# Supplementary material for: Integrating Machine Learning with Metabolic Models for Precision Trauma Care: Personalized ENDOTYPE Stratification and Metabolic Target Identification
Source: Research Square preprint supplement (doi:10.21203/rs.3.rs-6258357/v1), 2025-03-27
Supplement: Supplementary file 1 [file 2055298ca3221b62a15d501a.xlsx]

## Sheet: Sheet1
Reaction Index	Reaction ID	Reaction Name	Pathway	EC number	GPR	lb	ub	Confidence Scores	Notes	References
1	10FTHF7GLUtl	7-glutamyl-10FTHF transport, lysosomal	Transport, Lysosomal			0	1000	2	carrier-mediated transport - but which and how is unknown IT	Suh JR, Herbig AK, Stover PJ. #TITLE:New perspectives on folate catabolism. #JOURNAL:Annu Rev Nutr.#YEAR:2001#PUBMED:11375437#
2	10FTHF7GLUtm	7-glutamyl-10FTHF transport, mitochondrial	Transport, Mitochondrial			0	1000	2	mechanism is unknown IT	Suh JR, Herbig AK, Stover PJ. #TITLE:New perspectives on folate catabolism. #JOURNAL:Annu Rev Nutr.#YEAR:2001#PUBMED:11375437#
3	10FTHFtl	10-Formyltetrahydrofolate lysosomal transport via diffusion	Transport, Lysosomal			-1000	1000	2	NCD, IT	Suh JR, Herbig AK, Stover PJ. #TITLE:New perspectives on folate catabolism. #JOURNAL:Annu Rev Nutr.#YEAR:2001#PUBMED:11375437#
4	10FTHFtm	10-Formyltetrahydrofolate mitochondrial transport via diffusion	Transport, Mitochondrial			-1000	1000	2	NCD	Suh JR, Herbig AK, Stover PJ. #TITLE:New perspectives on folate catabolism. #JOURNAL:Annu Rev Nutr.#YEAR:2001#PUBMED:11375437#
5	13DAMPPOX	1,3-Diaminopropane:oxygen oxidoreductase (deaminating)	beta-Alanine metabolism	1.4.3.6	( 8639.1 ) or ( 26.1 ) or ( 314.2 ) or ( 314.1 )	0	1000	1	SAB	Smith DJ, Salmi M, Bono P, Hellman J, Leu T, Jalkanen S.#TITLE:Cloning of vascular adhesion protein 1 reveals a novel multifunctional adhesion molecule#JOURNAL: J Exp Med#YEAR:1998#PUBMED:9653080#;Lyles GA#TITLE:Mammalian plasma and tissue-bound semicarbazide-sensitive amine oxidases: biochemical, pharmacological and toxicological aspects#JOURNAL:Int J Biochem Cell Biol#YEAR:1996#PUBMED:8920635#;…
6	1MNCAMti	N1-Methylnicotinamide transport	Transport, Extracellular			0	1000	2	IT based on information in Bender, 2003, 2nd Ed., Nutritional Biochemistry of the Vitamins, p. 206	Bender DA#TITLE:Nutritional Biochemistry of the Vitamins#YEAR:2003#
7	1PPDCRp	delta1-piperideine-2-carboxylate reductase, perixosomal	Lysine Metabolism			0	1000	2	MM	IJlst L, de Kromme I, Oostheim W, Wanders RJ.#TITLE:Molecular cloning and expression of human L-pipecolate oxidase.#YEAR:2000#PUBMED:10772957#;Murthy SN, Janardanasarma MK.#TITLE:Identification of L-amino acid/L-lysine alpha-amino oxidase in mouse brain.#YEAR:1999#PUBMED:10485319#
8	24,25DHVITD2t	24,25-Dihydroxyvitamin D2 transport from cytoplasm	Transport, Extracellular			0	0	2	is found in blood --&gt; subsequently has to be transported but how? based on Vitamins, G.F.M. Ball,2004, Blackwell publishing, 1st ed (book) pg.193 IT	Ball, G.F.M#TITLE:Vitamins: Their Role in the Human Body#YEAR:2004#
9	24,25DHVITD2tm	24,25-Dihydroxyvitamin D2 transport from mitochondria	Transport, Mitochondrial			0	0	2	is found in blood --&gt; subsequently has to be transported but how? based on Vitamins, G.F.M. Ball,2004, Blackwell publishing, 1st ed (book) pg.193 IT	Ball, G.F.M#TITLE:Vitamins: Their Role in the Human Body#YEAR:2004#
10	24,25DHVITD3t	24,25-Dihydroxyvitamin D3 transport from cytoplasm	Transport, Extracellular			0	0	2	is found in blood --&gt; subsequently has to be transported but how? based on Vitamins, G.F.M. Ball,2004, Blackwell publishing, 1st ed (book) pg.193 IT	Ball, G.F.M#TITLE:Vitamins: Their Role in the Human Body#YEAR:2004#
11	24,25DHVITD3tm	24,25-Dihydroxyvitamin D3 transport from mitochondria	Transport, Mitochondrial			0	0	2	is found in blood --&gt; subsequently has to be transported but how? based on Vitamins, G.F.M. Ball,2004, Blackwell publishing, 1st ed (book) pg.193 IT	Ball, G.F.M#TITLE:Vitamins: Their Role in the Human Body#YEAR:2004#
12	24,25VITD2Hm	24R-Vitamin D-25-hydroxylase (D2)	Vitamin D		( 1591.1 )	0	0	4	based on Vitamins, G.F.M. Ball,2004, Blackwell publishing, 1st ed (book) pg.196 IT	Ball, G.F.M#TITLE:Vitamins: Their Role in the Human Body#YEAR:2004#;Kusudo T, Sakaki T, Abe D, Fujishima T, Kittaka A, Takayama H, Hatakeyama S, Ohta M, Inouye K.#TITLE:Metabolism of A-ring diastereomers of 1alpha,25-dihydroxyvitamin D3 by CYP24A1. #JOURNAL:Biochem Biophys Res Commun.#YEAR:2004#PUBMED:15358094#;Labuda M, Lemieux N, Tihy F, Prinster C, Glorieux FH.#TITLE:Human 25-hydroxyvitamin D …
13	24,25VITD3Hm	24R-Vitamin D-25-hydroxylase (D3)	Vitamin D		( 1591.1 )	0	0	4	based on Vitamins, G.F.M. Ball,2004, Blackwell publishing, 1st ed (book) pg.196 IT	Ball, G.F.M#TITLE:Vitamins: Their Role in the Human Body#YEAR:2004#;Kusudo T, Sakaki T, Abe D, Fujishima T, Kittaka A, Takayama H, Hatakeyama S, Ohta M, Inouye K.#TITLE:Metabolism of A-ring diastereomers of 1alpha,25-dihydroxyvitamin D3 by CYP24A1. #JOURNAL:Biochem Biophys Res Commun.#YEAR:2004#PUBMED:15358094#;Labuda M, Lemieux N, Tihy F, Prinster C, Glorieux FH.#TITLE:Human 25-hydroxyvitamin D …
14	25HVITD2tin	25-hydroxyvitamin D2 transport in cytoplasm	Transport, Extracellular			0	0	2	is found in blood --&gt; subsequently has to be transported but how? based on Vitamins, G.F.M. Ball,2004, Blackwell publishing, 1st ed (book) pg.193 IT	Ball, G.F.M#TITLE:Vitamins: Their Role in the Human Body#YEAR:2004#
15	25HVITD2tin_m	25-hydroxyvitamin D2 transport in mitochondria	Transport, Mitochondrial			0	0	2	is found in blood --&gt; subsequently has to be transported but how? based on Vitamins, G.F.M. Ball,2004, Blackwell publishing, 1st ed (book) pg.193 IT	Ball, G.F.M#TITLE:Vitamins: Their Role in the Human Body#YEAR:2004#
16	2AMACHYD	2-Aminoacrylate hydrolysis	Glycine, Serine, and Threonine Metabolism			0	1000	4	SAB see PMID 500639: this reaction is spontaneous	Gavaret JM, Cahnmann HJ, Nunez J#TITLE:The fate of the &quot;lost side chain&quot; during thyroid hormonogenesis#JOURNAL:J Biol Chem#YEAR:1979#PUBMED:500639#
17	2AMACSULT	2-Aminoacrylate sulfotransferase	Cysteine Metabolism			0	1000	2	-this is a lumped rxn w/ an inferred reduction rxn that occurs in conjunction w/ sulfotransferase step; this reduction step has to occur in order for the transformation (2amac--&gt;Lcyst) to be valid -used NADPH as electron donor since it is a common cofactor involved in biosynthetic steps utilizing oxygen (see Neema for further explanations) MM	Cooper AJ#TITLE:Biochemistry of sulfur-containing amino acids.#YEAR:1983#PUBMED:6351723#;Weinstein CL, Griffith OW.#TITLE:Cysteinesulfonate and beta-sulfopyruvate metabolism. Partitioning between decarboxylation, transamination, and reduction pathways.#YEAR:1988#PUBMED:3346220#
18	2AMADPTm	L-2-aminoadipate shuttle (cytosol/mitochondria)	Lysine Metabolism		( 89874.1 )	-1000	1000	4	SAB PMID 11083877	Fiermonte G, Dolce V, Palmieri L, Ventura M, Runswick MJ, Palmieri F, Walker JE#TITLE:Identification of the human mitochondrial oxodicarboxylate carrier. Bacterial expression, reconstitution, functional characterization, tissue distribution, and chromosomal location#JOURNAL:J Biol Chem#YEAR:2001#PUBMED:11083877#
19	2HBO	2-Hydroxybutyrate:NAD+ oxidoreductase	Propanoate Metabolism	1.1.1.27	( 92483.1 ) or ( 3948.2 ) or ( 55293.1 ) or ( 3945.1 and 3939.1 ) or ( 3939.1 ) or ( 160287.1 ) or ( 3945.1 ) or ( 3948.1 )	-1000	1000	4	NCD	Komoda T, Sakagishi Y, Mizushima H#TITLE:Determination of isoenzyme contents of lactic dehydrogenase activity and 2-hydroxybutyric dehydrogenase activity in lactic dehydrogenase preparations#JOURNAL:Clin Chim Acta#YEAR:1976#PUBMED:10108#;Naghizadeh F#TITLE:Oxidation of alpha-hydroxybutyrate by human serum#JOURNAL:Clin Chim Acta#YEAR:1977#PUBMED:21765#
20	2HBt2	2-hydroxybutyrate cotransport with proton	Transport, Extracellular		( 9123.1 ) or ( 9194.1 ) or ( 6566.1 )	-1000	1000	4	NCD	Lin RY, Vera JC, Chaganti RS, Golde DW#TITLE:Human monocarboxylate transporter 2 (MCT2) is a high affinity pyruvate transporter#JOURNAL:J Biol Chem#YEAR:1998#PUBMED:9786900#;Halestrap AP, Price NT#TITLE:The proton-linked monocarboxylate transporter (MCT) family: structure, function and regulation#JOURNAL:Biochem J#YEAR:1999#PUBMED:10510291#;Garcia CK, Li X, Luna J, Francke U#TITLE:cDNA cloning of…
21	2HCO3_NAt	bicarbonate transport (Na/HCO3 1:2 cotransport)	Transport, Extracellular		( 57835.3 ) or ( 8671.1 ) or ( 57835.2 ) or ( 57835.1 ) or ( 57835.4 )	0	0	4	MM	Romero MF, Fulton CM, Boron WF.#TITLE:The SLC4 family of HCO 3 - transporters.#YEAR:2004#PUBMED:14722772#
22	2MCITt	2-methylcitrate transport via diffusion	Transport, Extracellular			-1000	1000	2	MM	Weidman SW, Drysdale GR.#TITLE:he biosynthesis of methylcitrate.#JOURNAL:Biochem J#YEAR:1979#PUBMED:426765#
23	2OXOADOXm	2-Oxoadipate:lipoamde 2-oxidoreductase(decarboxylating and acceptor-succinylating) (mitochondria)	Lysine Metabolism	1.2.4.2	( 4967.1 ) and ( 1738.1 and 8050.1 ) and ( 1743.1 ) or ( 4967.2 ) and ( 1738.1 and 8050.1 ) and ( 1743.1 )	0	1000	2	SAB	Cox, RP#TITLE:Errors of lysine metabolism#JOURNAL:The Metabolic and Molecular Bases of Inherited Disease, 8th ed#YEAR:2001#
24	2OXOADPTm	2-oxoadipate shuttle (cytosol/mitochondria)	Tryptophan metabolism		( 89874.1 )	-1000	1000	4	SAB PMID 11083877	Fiermonte G, Dolce V, Palmieri L, Ventura M, Runswick MJ, Palmieri F, Walker JE#TITLE:Identification of the human mitochondrial oxodicarboxylate carrier. Bacterial expression, reconstitution, functional characterization, tissue distribution, and chromosomal location#JOURNAL:J Biol Chem#YEAR:2001#PUBMED:11083877#
25	34DHOXPEGOX	3,4-Dihydroxyphenylethyleneglycol:NAD+ oxidoreductase	Tyrosine metabolism	1.1.1.1	( 130.1 ) or ( 127.1 ) or ( 125.1 and 124.1 ) or ( 131.1 ) or ( 126.1 and 124.1 ) or ( 128.1 ) or ( 137872.1 ) or ( 125.1 and 126.1 )	-1000	1000	4	SAB	Mardh G, Dingley AL, Auld DS, Vallee BL#TITLE:Human class II (pi) alcohol dehydrogenase has a redox-specific function in norepinephrine metabolism#JOURNAL:Proc Natl Acad Sci U S A#YEAR:1986#PUBMED:3466164#
26	34DHOXPEGt	3,4-Dihydroxyphenylethyleneglycol transport (diffusion)	Transport, Extracellular			-1000	1000	2	SAB	Kurz T, Richardt G, Hagl S, Seyfarth M, Schomig A#TITLE:Two different mechanisms of noradrenaline release during normoxia and simulated ischemia in human cardiac tissue#JOURNAL:J Mol Cell Cardiol#YEAR:1995#PUBMED:7473774#
27	34DHPHEt	3,4-Dihydroxy-L-phenylalanine transport	Transport, Extracellular		( 117247.1 )	-1000	1000	4	NCD	Kim do K, Kanai Y, Matsuo H, Kim JY, Chairoungdua A, Kobayashi Y, Enomoto A, Cha SH, Goya T, Endou H#TITLE:The human T-type amino acid transporter-1: characterization, gene organization, and chromosomal location#JOURNAL:Genomics#YEAR:2002#PUBMED:11827462#
28	34DHPLACOX	3,4-Dihydroxyphenylacetaldehyde:NAD+ oxidoreductase	Tyrosine metabolism	1.2.1.5	( 218.1 ) or ( 222.1 ) or ( 220.1 ) or ( 221.1 )	0	1000	4	SAB	Ambroziak W, Pietruszko R#TITLE:Human aldehyde dehydrogenase. Activity with aldehyde metabolites of monoamines, diamines, and polyamines#JOURNAL:J Biol Chem#YEAR:1991#PUBMED:2071588#;Keung WM#TITLE:Biogenic aldehyde(s) derived from the action of monoamine oxidase may mediate the antidipsotropic effect of daidzin#JOURNAL:Chem Biol Interact#YEAR:2001#PUBMED:11306106#
29	34DHPLACOX(NADP)	3,4-Dihydroxyphenylacetaldehyde:NADP+ oxidoreductase	Tyrosine metabolism	1.2.1.5	( 222.1 ) or ( 221.1 ) or ( 218.1 )	-1000	1000	4	SAB	Ambroziak W, Pietruszko R#TITLE:Human aldehyde dehydrogenase. Activity with aldehyde metabolites of monoamines, diamines, and polyamines#JOURNAL:J Biol Chem#YEAR:1991#PUBMED:2071588#;Keung WM#TITLE:Biogenic aldehyde(s) derived from the action of monoamine oxidase may mediate the antidipsotropic effect of daidzin#JOURNAL:Chem Biol Interact#YEAR:2001#PUBMED:11306106#
30	34DHXMANDACOX	3,4-Dihydroxymandelaldehyde:NAD+ oxidoreductase	Tyrosine metabolism	1.2.1.5	( 221.1 ) or ( 218.1 ) or ( 220.1 )	0	1000	4	SAB	Sladek NE#TITLE:Human aldehyde dehydrogenases: potential pathological, pharmacological, and toxicological impact#JOURNAL:J Biochem Mol Toxicol#YEAR:2003#PUBMED:12616643#;Kawamura M, Eisenhofer G, Kopin IJ, Kador PF, Lee YS, Tsai JY, Fujisawa S, Lizak MJ, Sinz A, Sato S#TITLE:Aldose reductase, a key enzyme in the oxidative deamination of norepinephrine in rats#JOURNAL:Biochem Pharmacol#YEAR:1999#P…
31	34DHXMANDACOX(NADP)	3,4-Dihydroxymandelaldehyde:NADP+ oxidoreductase	Tyrosine metabolism	1.2.1.5	( 221.1 ) or ( 222.1 )	-1000	1000	4	SAB	Sladek NE#TITLE:Human aldehyde dehydrogenases: potential pathological, pharmacological, and toxicological impact#JOURNAL:J Biochem Mol Toxicol#YEAR:2003#PUBMED:12616643#;Kawamura M, Eisenhofer G, Kopin IJ, Kador PF, Lee YS, Tsai JY, Fujisawa S, Lizak MJ, Sinz A, Sato S#TITLE:Aldose reductase, a key enzyme in the oxidative deamination of norepinephrine in rats#JOURNAL:Biochem Pharmacol#YEAR:1999#P…
32	34HPPOR	4-Hydroxyphenylpyruvate:oxygen oxidoreductase	Tyrosine metabolism	1.13.11.27	( 3242.1 )	0	1000	4	NCD	Metzler, David E#TITLE:Biochemistry : the chemical reactions of living cells 2 ed vol 2#YEAR:2001#
33	35CGMPtn	35cGMP nuclear transport	Transport, Nuclear			-1000	1000	2	IT
34	3AIBTm	L-3-aminoisobutyrate transaminase, mitochondrial	Valine, Leucine, and Isoleucine Metabolism	2.6.1.22	( 18.1 ) or ( 18.2 )	-1000	1000	2	NCD	Orten JM, Neuhaus OW.#TITLE:Human Biochemistry#YEAR:1975#
35	3AIBt	3-amino-isobutyrate transport	Transport, Extracellular			0	1000	2	HOW? IT	Devlin, TM#TITLE:Textbook of Biochemistry with Clinical Correlations#YEAR:2001#;Orten JM, Neuhaus OW.#TITLE:Human Biochemistry#YEAR:1975#
36	3AIBtm	3-amino-isobutyrate transport, mitochondrial	Transport, Mitochondrial		( 18.1 ) or ( 18.2 )	0	1000	2	none	Orten JM, Neuhaus OW.#TITLE:Human Biochemistry#YEAR:1975#
37	3DSPHR	3-Dehydrosphinganine reductase	Sphingolipid Metabolism	1.1.1.102	( 2531.1 )	0	1000	4	NCD	Varki, Cummings, Esko, Freeze, Hart, Marth#TITLE:Essentials of Glycobiology#YEAR:1999#;Voet D, Voet JG#TITLE:Biochemistry#YEAR:1995#;Murray RK, Granner DK, Mayes PA, Rodwell VW#TITLE:Harper&apos;s Biochemistry#YEAR:1999#
38	3HAO	3-hydroxyanthranilate 3,4-dioxygenase	Tryptophan metabolism	1.13.11.6	( 23498.1 )	0	1000	4	NCD	Malherbe P, Kohler C, Da Prada M, Lang G, Kiefer V, Schwarcz R, Lahm HW, Cesura AM#TITLE:Molecular cloning and functional expression of human 3-hydroxyanthranilic-acid dioxygenase#JOURNAL:J Biol Chem#YEAR:1994#PUBMED:7514594#
39	3HBCOAHLm	3-hydroxyisobutyryl-CoA hydrolase, mitochondrial	Valine, Leucine, and Isoleucine Metabolism	3.1.2.4		0	1000	2	MM	Hawes JW, Jaskiewicz J, Shimomura Y, Huang B, Bunting J, Harper ET, Harris RA. #TITLE:Primary structure and tissue-specific expression of human beta-hydroxyisobutyryl-coenzyme A hydrolase. #JOURNAL:J Biol Chem#YEAR:1996#PUBMED:8824301#
40	3HCO3_NAt	bicarbonate transport (Na/HCO3 1:3 cotransport)	Transport, Extracellular			0	0	4	MM	Romero MF, Fulton CM, Boron WF.#TITLE:The SLC4 family of HCO 3 - transporters.#YEAR:2004#PUBMED:14722772#
41	3HKYNAKGAT	3-Hydroxy-L-kynurenine:2-oxoglutarate aminotransferase	Tryptophan metabolism	2.6.1.7	( 51166.1 ) or ( 883.1 ) or ( 51166.2 )	0	1000	2	SAB	BONNER DM, JAKOBY WB#TITLE:Kynurenine transaminase from neurospora#JOURNAL:J Biol Chem#YEAR:1956#PUBMED:13357462#
42	3MLDAt	3MLDA extracellular transport via diffusion	Transport, Extracellular			-1000	1000	2	SAB	Johansson AC, Lonnqvist B, Granerus G#TITLE:The relationship between body size and the urinary excretion of the main histamine metabolite tele-methylimidazoleacetic acid in man#JOURNAL:Inflamm Res#YEAR:2001#PUBMED:11411609#
43	3MOX4HOXPGALDOX	3-Methoxy-4-hydroxyphenylglycolaldehyde:NAD+ oxidoreductase	Tyrosine metabolism	1.2.1.5	( 222.1 ) or ( 220.1 ) or ( 221.1 ) or ( 218.1 )	0	1000	2	SAB	Metzler, David E#TITLE:Biochemistry : the chemical reactions of living cells 2 ed vol 2#YEAR:2001#
44	3MOX4HOXPGALDOX(NADP)	3-Methoxy-4-hydroxyphenylglycolaldehyde:NADP+ oxidoreductase	Tyrosine metabolism	1.2.1.5	( 222.1 ) or ( 220.1 ) or ( 221.1 ) or ( 218.1 )	-1000	1000	2	SAB	Metzler, David E#TITLE:Biochemistry : the chemical reactions of living cells 2 ed vol 2#YEAR:2001#
45	3SALAASPm	cysteinesulfinate-aspartate mitochondrial shuttle	Transport, Mitochondrial		( 10165.1 ) or ( 8604.1 )	-1000	1000	2	PMID:486467 MM	Palmieri, F.#TITLE: The mitochondrial transporter family (SLC25): physiological and pathological implications.#JOURNAL: Pflugers Archive#YEAR:2004#PUBMED:14598172#
46	3SALACBOXL	3-Sulfino-L-alanine carboxy-lyase	Taurine and hypotaurine metabolism	4.1.1.15	( 51380.1 ) or ( 2571.1 ) or ( 2572.1 ) or ( 2571.2 )	0	1000	4	SAB	Metzler, David E#TITLE:Biochemistry : the chemical reactions of living cells 2 ed vol 2#YEAR:2001#
47	3SALATAim	3-sulfino-alanine transaminase (irreversible), mitochondrial	Cysteine Metabolism		( 2806.1 )	0	1000	2	MM
48	3SPYRSPm	3-sulfinopyruvate hydrolase (spotaneous reaction), mitochondrial	Cysteine Metabolism			0	1000	2	MM	Weinstein CL, Griffith OW.#TITLE:Cysteinesulfonate and beta-sulfopyruvate metabolism. Partitioning between decarboxylation, transamination, and reduction pathways.#YEAR:1988#PUBMED:3346220#
49	41R1H2MAE12BOOX	4-[(1R)-1-Hydroxy-2-(methylamino)ethyl]-1,2-benzenediol:oxygen oxidoreductase(deaminating)(flavin-containing)	Tyrosine metabolism	1.4.3.4	( 4128.1 ) or ( 4129.1 )	0	1000	4	SAB	Smith DJ, Salmi M, Bono P, Hellman J, Leu T, Jalkanen S.#TITLE:Cloning of vascular adhesion protein 1 reveals a novel multifunctional adhesion molecule#JOURNAL: J Exp Med#YEAR:1998#PUBMED:9653080#;Lyles GA#TITLE:Mammalian plasma and tissue-bound semicarbazide-sensitive amine oxidases: biochemical, pharmacological and toxicological aspects#JOURNAL:Int J Biochem Cell Biol#YEAR:1996#PUBMED:8920635#;…
50	41R2A1H12BOOX	4-[(1R)-2-Amino-1-hydroxyethyl]-1,2-benzenediol:oxygen oxidoreductase(deaminating)(flavin-containing)	Tyrosine metabolism	1.4.3.4	( 4128.1 ) or ( 4129.1 )	0	1000	4	SAB	Smith DJ, Salmi M, Bono P, Hellman J, Leu T, Jalkanen S.#TITLE:Cloning of vascular adhesion protein 1 reveals a novel multifunctional adhesion molecule#JOURNAL: J Exp Med#YEAR:1998#PUBMED:9653080#;Lyles GA#TITLE:Mammalian plasma and tissue-bound semicarbazide-sensitive amine oxidases: biochemical, pharmacological and toxicological aspects#JOURNAL:Int J Biochem Cell Biol#YEAR:1996#PUBMED:8920635#;…
51	4ABUTtm	4-aminobutanoate mitochondrial transport via diffusion	Transport, Mitochondrial			-1000	1000	2	NCD	Medina-Kauwe LK, Tobin AJ, De Meirleir L, Jaeken J, Jakobs C, Nyhan WL, Gibson KM.#TITLE:_4-Aminobutyrate aminotransferase (GABA-transaminase) deficiency.#YEAR:1999#PUBMED:10407778#
52	4HDEBRISOQUINEte	xenobiotic transport	Transport, Extracellular			-1000	1000	2	unknown mechanism, related cyp P450 metabolism reactions NJ
53	4HOXPACDOX(NADP)	4-Hydroxyphenylacetaldehyde:NADP+ oxidoreductase	Tyrosine metabolism	1.2.1.5	( 222.1 ) or ( 220.1 ) or ( 221.1 ) or ( 218.1 )	-1000	1000	2	SAB	Shimamura M, Kamada S, Hayashi T, Naruse H, Iida Y.#TITLE:Sensitive determination of tyrosine metabolites, p-hydroxyphenylacetic acid, 4-hydroxy-3-methoxyphenyl-acetic acid and 4-hydroxy-3-methoxymandelic acid, by gas chromatography-negative-ion chemical-ionization mass spectrometry.#JOURNAL:J Chromatogr#YEAR:1986#PUBMED:3753983#
54	4NPHSFte	xenobiotic transport	Transport, Extracellular			-1000	1000	2	unknown mechanism, related cyp P450 metabolism reactions NJ
55	4NPHSULT	4-Nitrophenol Sulfotransferase	CYP Metabolism	2.8.2.1	( 6799.1 ) or ( 6817.3 ) or ( 6799.2 ) or ( 6818.2 ) or ( 6817.2 ) or ( 6818.1 ) or ( 6817.1 ) or ( 6817.4 ) or ( 6818.3 ) or ( 6817.5 )	0	1000	4	RS/TV (6/14/05)	Chapman E, Best MD, Hanson SR, Wong CH.#TITLE:Sulfotransferases: structure, mechanism, biological activity, inhibition, and synthetic utility.#JOURNAL:Angew Chem Int Ed Engl#YEAR:2004#PUBMED:15293241#;Glatt H, Boeing H, Engelke CE, Ma L, Kuhlow A, Pabel U, Pomplun D, Teubner W, Meinl W.#TITLE:Human cytosolic sulphotransferases: genetics, characteristics, toxicological aspects.#JOURNAL:Mutat Res#Y…
56	4NPHte	xenobiotic transport	Transport, Extracellular			-1000	1000	2	unknown mechanism, related cyp P450 metabolism reactions NJ
57	5ADTSTSTERONEGLCte	glucuronidated compound transport	Transport, Extracellular		( 4363.1 )	0	1000	2	presumed MDR transporter NJ
58	5ADTSTSTERONEGLCtr	glucuronidated compound transport	Transport, Endoplasmic Reticular			-1000	1000	2	unknown mechanism, however glucuronidated metabolites need to get out of the cell NJ
59	5ADTSTSTERONESULT	5alpha-Dihydrotestosterone sulfotransferase	Steroid Metabolism	2.8.2.2	( 6822.1 )	0	1000	4	NJ	Otterness DM, Wieben ED, Wood TC, Watson WG, Madden BJ, McCormick DJ, Weinshilboum RM.#TITLE:Human liver dehydroepiandrosterone sulfotransferase: molecular cloning and expression of cDNA.#JOURNAL:Mol Pharmacol#YEAR:1992#PUBMED:1588921#;Chatterjee B, Echchgadda I, Song CS#TITLE:Vitamin D receptor regulation of the steroid/bile acid sulfotransferase SULT2A1#JOURNAL:Methods Enzymol#YEAR:2005#PUBMED:…
60	5ADTSTSTERONESte	sulfonated testosterone transport	Transport, Extracellular			-1000	1000	1	unknown mechanism - presumed excretion of sulfonated testosterone NJ
61	5ADTSTSTERONEte	5 alpha dihydrotesterone transport	Transport, Extracellular			-1000	1000	1	specific mechanism not known, proton dependence for trans-mit transport has been suggested, however directionality and stoichiometry has not yet been elucidated. see PMID: 12770731 and others NJ
62	5ADTSTSTERONEtr	5 alpha dihydrotesterone intracellular transport	Transport, Endoplasmic Reticular			-1000	1000	2	specific mechanism not known, proton dependence for trans-mit transport has been suggested, however directionality and stoichiometry has not yet been elucidated. see PMID: 12770731 and others NJ
63	5AOPtm	5-Aminolevulinate mitochondrial transport	Heme Biosynthesis			-1000	1000	2	NCD
64	5FTHFt2	5-formyltetrahydrofolate transport via anion exchange	Transport, Extracellular		( 6573.1 ) or ( 6573.2 )	-1000	1000	4	IT	Ball, G.F.M#TITLE:Vitamins: Their Role in the Human Body#YEAR:2004#;Ganapathy V, Smith SB, Prasad PD.#TITLE:SLC19: the folate/thiamine transporter family.#JOURNAL:Pflugers Arch. #YEAR:2004#PUBMED:14770311#;Suh JR, Herbig AK, Stover PJ. #TITLE:New perspectives on folate catabolism. #JOURNAL:Annu Rev Nutr.#YEAR:2001#PUBMED:11375437#
65	5HTRPVESSEC	5-hydroxy-L-tryptophan secretion via secretory vesicle (ATP driven)	Transport, Extracellular		( 6570.1 ) or ( 6571.1 )	0	1000	4	SAB This reaction represents the ATP driven secretion of 5htrp from the cell. It leaves out the vesicle because that is not a compartment. ATP:H ratio is assumed as 1:3 for vacuolar ATPase and substrate:h ratio is 1:2. This gives a 3:2 ratio for substrate:ATP	Wagner CA, Finberg KE, Breton S, Marshansky V, Brown D, Geibel JP#TITLE:Renal vacuolar H+-ATPase#JOURNAL:Physiol Rev#YEAR:2004#PUBMED:15383652#;Eiden LE, Schafer MK, Weihe E, Schutz B#TITLE:The vesicular amine transporter family (SLC18): amine/proton antiporters required for vesicular accumulation and regulated exocytotic secretion of monoamines and acetylcholine#JOURNAL:Pflugers Arch#YEAR:2004#P…
66	5MTHFt	5-Methyltetrahydrofolate transport via receptor binding and protolysis	Transport, Extracellular		( 2348.5 ) or ( 2348.3 ) or ( 2348.1 ) or ( 2348.6 ) or ( 2352.1 ) or ( 2348.4 ) or ( 2348.2 )	-1000	1000	4	IT	Ball, G.F.M#TITLE:Vitamins: Their Role in the Human Body#YEAR:2004#
67	5MTHFt2	5-methyltetrahydrofolate transport via anion exchange	Transport, Extracellular		( 6573.1 ) or ( 6573.2 )	-1000	1000	4	IT	Ball, G.F.M#TITLE:Vitamins: Their Role in the Human Body#YEAR:2004#;Ganapathy V, Smith SB, Prasad PD.#TITLE:SLC19: the folate/thiamine transporter family.#JOURNAL:Pflugers Arch. #YEAR:2004#PUBMED:14770311#;Suh JR, Herbig AK, Stover PJ. #TITLE:New perspectives on folate catabolism. #JOURNAL:Annu Rev Nutr.#YEAR:2001#PUBMED:11375437#
68	7DHCHSTEROLtr	cholesterol precursor intracellular transport	Transport, Endoplasmic Reticular			0	0	2	specific mechanism not known, proton dependence for trans-mit transport has been suggested, however directionality and stoichiometry has not yet been elucidated. see PMID: 12770731 and others NJ
69	7DHFtl	7-glutamyl-DHF transport, lysosomal	Transport, Lysosomal			0	1000	2	carrier-mediated transport - but which and how is unknown IT	Suh JR, Herbig AK, Stover PJ. #TITLE:New perspectives on folate catabolism. #JOURNAL:Annu Rev Nutr.#YEAR:2001#PUBMED:11375437#
70	7DHFtm	7-glutamyl-DHF transport,m mitochondrial	Transport, Mitochondrial			0	1000	2	unknown mechanism. IT	Suh JR, Herbig AK, Stover PJ. #TITLE:New perspectives on folate catabolism. #JOURNAL:Annu Rev Nutr.#YEAR:2001#PUBMED:11375437#
71	7THFtl	7-glutamyl-THF transport, lysosomal	Transport, Lysosomal			0	1000	2	carrier-mediated transport - but which and how is unknown IT	Suh JR, Herbig AK, Stover PJ. #TITLE:New perspectives on folate catabolism. #JOURNAL:Annu Rev Nutr.#YEAR:2001#PUBMED:11375437#
72	7THFtm	7-glutamyl-THF transport,m mitochondrial	Transport, Mitochondrial			0	1000	2	unknown mechanism. IT	Suh JR, Herbig AK, Stover PJ. #TITLE:New perspectives on folate catabolism. #JOURNAL:Annu Rev Nutr.#YEAR:2001#PUBMED:11375437#
73	A4GALTg	Lactosylceramide 4-alpha-galactosyltransferase	Sphingolipid Metabolism		( 53947.1 )	0	1000	4	EC: 2.4.1.228 NJ	Kolter T, Sandhoff K#TITLE:Recent advances in the biochemistry of sphingolipidoses#JOURNAL:Brain Pathology#YEAR:1998#;Kojima Y, Fukumoto S, Furukawa K, Okajima T, Wiels J, Yokoyama K, Suzuki Y, Urano T, Ohta M, Furukawa K.#TITLE:Molecular cloning of globotriaosylceramide/CD77 synthase, a glycosyltransferase that initiates the synthesis of globo series glycosphingolipids.#JOURNAL:J Biol Chem#YEAR:…
74	A4GNT2g	alpha 1,4-N-acetylglucosaminyltransferase, Golgi apparatus	O-Glycan Biosynthesis		( 51146.1 )	0	1000	0	EC 2.4.1.- NCD	Nakayama J, Yeh JC, Misra AK, Ito S, Katsuyama T, Fukuda M.#TITLE:Expression cloning of a human alpha1, 4-N-acetylglucosaminyltransferase that forms GlcNAcalpha1--&gt;4Galbeta--&gt;R, a glycan specifically expressed in the gastric gland mucous cell-type mucin#JOURNAL:Proc Natl Acad Sci U S A.#YEAR:1999#PUBMED:10430883#
75	AACTOOR	Aminoacetone:oxygen oxidoreductase(deaminating)(flavin-containing)	Glycine, Serine, and Threonine Metabolism		( 8639.1 )	0	1000	4	MM	Dalfo E, Hernandez M, Lizcano JM, Tipton KF, Unzeta M.#TITLE:Activation of human lung semicarbazide sensitive amine oxidase by a low molecular weight component present in human plasma. #YEAR:2003#PUBMED:12878330#;Deng Y, Yu PH.#TITLE:Assessment of the deamination of aminoacetone, an endogenous substrate for semicarbazide-sensitive amine oxidase.#YEAR:1999#PUBMED:10328770#
76	AACTtm	Aminoacetone transport (mitochondrial)	Transport, Mitochondrial			0	1000	1	MM
77	AAPSAS	AAPSAS	Lysine Metabolism			0	1000	2	non-enzymatic reaction MM	IJlst L, de Kromme I, Oostheim W, Wanders RJ.#TITLE:Molecular cloning and expression of human L-pipecolate oxidase.#YEAR:2000#PUBMED:10772957#
78	AASAD3	L-aminoadipate-semialdehyde dehydrogenase (NADH)	Lysine Metabolism	1.2.1.31		0	1000	2	MM	Cox, RP#TITLE:Errors of lysine metabolism#JOURNAL:The Metabolic and Molecular Bases of Inherited Disease, 8th ed#YEAR:2001#
79	AASAD3m	L-aminoadipate-semialdehyde dehydrogenase (NADH), mitochondrial	Lysine Metabolism	1.2.1.31		0	1000	2	MM	Salway, JG#TITLE:Metabolism at a Glance, 2nd ed#YEAR:1999#
80	AATAi	2-aminoadipate transaminase, irreversible	Lysine Metabolism	2.6.1.39	( 51166.1 ) or ( 51166.2 )	0	1000	4	MM	Cox, RP#TITLE:Errors of lysine metabolism#JOURNAL:The Metabolic and Molecular Bases of Inherited Disease, 8th ed#YEAR:2001#;Goh,D.L.M., Patel,A., Thomas,G.H., Salomons,G.S., Schor,D.S.M., Jakobs,C., Geraghty,M.T., #TITLE:Characterization of the human gene encoding alpha-aminoadipate aminotransferase (AADAT). #YEAR:2002#PUBMED:12126930#
81	ABTArm	4-aminobutyrate transaminase, reversible (mitochondrial)	Glutamate metabolism	2.6.1.19	( 18.1 ) or ( 18.2 )	-1000	1000	4	kh 1/6/03	Medina-Kauwe LK, Tobin AJ, De Meirleir L, Jaeken J, Jakobs C, Nyhan WL, Gibson KM.#TITLE:_4-Aminobutyrate aminotransferase (GABA-transaminase) deficiency.#YEAR:1999#PUBMED:10407778#;Osei,Y.D. , Churchich,J.E. #TITLE:Screening and sequence determination of a cDNA encoding the human brain 4-aminobutyrate aminotransferase.#YEAR:1995#PUBMED:7721088#
82	ABUTD	Aminobutyraldehyde dehydrogenase	beta-Alanine metabolism	1.2.1.19	( 223.1 )	0	1000	4	JLR	Lin SW, Chen JC, Hsu LC, Hsieh CL, Yoshida A.#TITLE:Human gamma-aminobutyraldehyde dehydrogenase (ALDH9): cDNA sequence, genomic organization, polymorphism, chromosomal localization, and tissue expression.#YEAR:1996#PUBMED:8786138#
83	ABUTt2r	4-aminobutyrate reversible transport in via proton symport	Transport, Extracellular		( 206358.1 )	-1000	1000	2	SAB r	Sagne C, Agulhon C, Ravassard P, Darmon M, Hamon M, El Mestikawy S, Gasnier B, Giros B#TITLE:Identification and characterization of a lysosomal transporter for small neutral amino acids#JOURNAL:Proc Natl Acad Sci U S A#YEAR:2001#PUBMED:11390972#;Boll M, Foltz M, Rubio-Aliaga I, Kottra G, Daniel H#TITLE:Functional characterization of two novel mammalian electrogenic proton-dependent amino acid cot…
84	ABUTt4(2)r	4-aminobutyrate reversible transport in via sodium symport (1:2)	Transport, Extracellular		( 6529.1 ) or ( 6538.1 ) or ( 6540.1 ) or ( 6539.1 )	-1000	1000	4	SAB	Chen NH, Reith ME, Quick MW#TITLE:Synaptic uptake and beyond: the sodium- and chloride-dependent neurotransmitter transporter family SLC6#JOURNAL:Pflugers Arch#YEAR:2004#PUBMED:12719981#
85	ACACT1	acetyl-CoA C-acetyltransferase	Cholesterol Metabolism	2.3.1.9	( 39.1 )	0	1000	4	LOCUS:_39#TRANSCRIPT:1#ABBREVIATION:ACAT2#ECNUMBERS:2.3.1.9#	Voet D, Voet JG#TITLE:Biochemistry#YEAR:1995#;Olivier LM, Krisans SK#TITLE:Peroxisomal protein targeting and identification of peroxisomal targeting signals in cholesterol biosynthetic enzymes#JOURNAL:Biochimica et Biophysica Acta#YEAR:2000#
86	ACACT10m	acetyl-CoA C-acetyltransferase, mitochondrial	Valine, Leucine, and Isoleucine Metabolism	2.3.1.9	( 38.1 )	-1000	1000	4	MM
87	ACACT1rm	acetyl-CoA C-acetyltransferase, mitochondrial	Tryptophan metabolism	2.3.1.9	( 3030.1 ) and ( 3032.1 ) or ( 38.1 )	-1000	1000	0	TDV
88	ACACT5p	acetyl-CoA C-acyltransferase (decanoyl-CoA), peroxisomal	Fatty Acid Metabolism	2.3.1.16	( 30.1 )	0	1000	4	NCD	Bout A, Franse MM, Collins J, Blonden L, Tager JM, Benne R.#TITLE:Characterization of the gene encoding human peroxisomal 3-oxoacyl-CoA thiolase (ACAA). No large DNA rearrangement in a thiolase-deficient patient.#JOURNAL:Biochim Biophys Acta#YEAR:1991#PUBMED:1679347#
89	ACACT6p	acetyl-CoA C-acetyltransferase (dodecanoyl), peroxisomal	Fatty Acid Metabolism	2.3.1.16	( 30.1 )	0	1000	4	NCD	Bout A, Franse MM, Collins J, Blonden L, Tager JM, Benne R.#TITLE:Characterization of the gene encoding human peroxisomal 3-oxoacyl-CoA thiolase (ACAA). No large DNA rearrangement in a thiolase-deficient patient.#JOURNAL:Biochim Biophys Acta#YEAR:1991#PUBMED:1679347#
90	ACACt2	acetoacetate transport via proton symport	Transport, Extracellular		( 6566.1 ) or ( 9194.1 )	-1000	1000	4	originally named AACTP NCD	Lin RY, Vera JC, Chaganti RS, Golde DW#TITLE:Human monocarboxylate transporter 2 (MCT2) is a high affinity pyruvate transporter#JOURNAL:J Biol Chem#YEAR:1998#PUBMED:9786900#;Halestrap AP, Price NT#TITLE:The proton-linked monocarboxylate transporter (MCT) family: structure, function and regulation#JOURNAL:Biochem J#YEAR:1999#PUBMED:10510291#;Garcia CK, Li X, Luna J, Francke U#TITLE:cDNA cloning of…
91	ACACt2m	Acetoacetate mitochondrial transport via H+ symport	Transport, Mitochondrial		( 6566.1 )	-1000	1000	4	IT, TDV changed name from &quot;tm2&quot; to &quot;t2m&quot; - NCD	Pande SV, Parvin R.#TITLE:Pyruvate and acetoacetate transport in mitochondria. A reappraisal.#JOURNAL:J Biol Chem#YEAR:1975#PUBMED:627555#;Halestrap AP.#TITLE:Pyruvate and ketone-body transport across the mitochondrial membrane. Exchange properties, pH-dependence and mechanism of the carrier.#JOURNAL:Biochem J#YEAR:1978#PUBMED:28726#
92	ACALDtm	acetaldehyde mitochondrial diffusion	Transport, Mitochondrial			0	0	2	NCD	Lieber CS#TITLE:Ethanol metabolism, cirrhosis and alcoholism#JOURNAL:Clin Chim Acta#YEAR:1997#PUBMED:9028626#
93	ACCOAC	acetyl-CoA carboxylase	Fatty Acid Metabolism	6.4.1.2	( 31.1 and 32.1 )	0	1000	4	A biotinyl-protein. Step 1: biotin + ATP + HCO3 -&gt; carboxy-biotin + ADP + Pi. Step 2: carboxy-biotin + ACCOA -&gt; MALCOA bacteria have separate enzymes for each step and a biotin-carrier protein; in yeast a single protein carries out all activities NCD
94	ACCOAL	acetate-CoA ligase (ADP-forming)	Propanoate Metabolism	6.2.1.13	( 55902.1 ) or ( 55902.2 )	0	1000	4	JLR- also acts on propanoate	Luong A, Hannah VC, Brown MS, Goldstein JL#TITLE:Molecular characterization of human acetyl-CoA synthetase, an enzyme regulated by sterol regulatory element-binding proteins#JOURNAL:J Biol Chem#YEAR:2000#PUBMED:10843999#
95	ACCOAgt	acetyl-coa transport	Transport, Extracellular		( 9197.1 )	-1000	1000	4	transport between cytosol and Golgi/ER presumed presumed facilitated transport, but unknown co-substrates, see PMID: 12739170, Hirabayashi et al NJ	Hirabayashi Y, Kanamori A, Nomura KH, Nomura K.#TITLE:The acetyl-CoA transporter family SLC33.#JOURNAL:Pflugers Arch.#YEAR:2004#PUBMED:12739170#
96	ACCOAtn	acetyl-CoA transport, nuclear	Transport, Nuclear			-1000	1000	1	NCD
97	ACETONEt2	acetone transport via proton symport	Transport, Extracellular		( 6566.1 ) or ( 9123.1 ) or ( 9194.1 )	-1000	1000	4	NCD	Lin RY, Vera JC, Chaganti RS, Golde DW#TITLE:Human monocarboxylate transporter 2 (MCT2) is a high affinity pyruvate transporter#JOURNAL:J Biol Chem#YEAR:1998#PUBMED:9786900#;Halestrap AP, Price NT#TITLE:The proton-linked monocarboxylate transporter (MCT) family: structure, function and regulation#JOURNAL:Biochem J#YEAR:1999#PUBMED:10510291#;Garcia CK, Li X, Luna J, Francke U#TITLE:cDNA cloning of…
98	ACETONEt2m	acetone mitochondrial transport via proton symport	Transport, Mitochondrial		( 6566.1 )	-1000	1000	0	NCD
99	ACGAGBSIDEtg	acgagbside hs intracellular transport	Transport, Golgi Apparatus			-1000	1000	1	unknown mechanism for transport - however must get to other intracellular compartments (e.g. lysosome for degradation) NJ	Perry RJ, Ridgway ND.#TITLE:Molecular mechanisms and regulation of ceramide transport.#JOURNAL:Biochim Biophys Acta#YEAR:2005#PUBMED:15907394#
100	ACGAGBSIDEtl	acgagbside hs intracellular transport	Transport, Lysosomal			-1000	1000	1	unknown mechanism for transport - however must get to other intracellular compartments (e.g. lysosome for degradation) NJ	Perry RJ, Ridgway ND.#TITLE:Molecular mechanisms and regulation of ceramide transport.#JOURNAL:Biochim Biophys Acta#YEAR:2005#PUBMED:15907394#
101	ACGALK2	N-acetylgalactosamine kinase (ITP)	Aminosugar Metabolism			0	1000	2	NCD	Varki, Cummings, Esko, Freeze, Hart, Marth#TITLE:Essentials of Glycobiology#YEAR:1999#
102	ACGALtlg	N-acetyl-galactosamine intracellular transport	Transport, Golgi Apparatus			-1000	1000	2	unknown mechanism - may be vesicular NJ
103	ACGALtly	N-acetyl-galactosamine lysosomal efflux	Transport, Lysosomal			0	1000	2	NCD	Rome LH, Hill DF#TITLE:Lysosomal degradation of glycoproteins and glycosaminoglycans. Efflux and recycling of sulphate and N-acetylhexosamines#JOURNAL:Biochem J#YEAR:1986#PUBMED:3753439#;Jonas AJ, Speller RJ, Conrad PB, Dubinsky WP#TITLE:Transport of N-acetyl-D-glucosamine and N-acetyl-D-galactosamine by rat liver lysosomes#JOURNAL:J Biol Chem#YEAR:1989#PUBMED:2784441#
104	ACGAM2E	N-acetylglucosamine 2-epimerase	Aminosugar Metabolism	5.1.3.8	( 5973.1 )	-1000	1000	4	NCD	Luchansky SJ, Yarema KJ, Takahashi S, Bertozzi CR#TITLE:GlcNAc 2-epimerase can serve a catabolic role in sialic acid metabolism#JOURNAL:J Biol Chem#YEAR:2003#PUBMED:12499362#
105	ACGAM6PSi	N-acetylglucosamine-6-phosphate synthase	Aminosugar Metabolism	2.3.1.4	( 64841.1 )	0	1000	2	NCD	Varki, Cummings, Esko, Freeze, Hart, Marth#TITLE:Essentials of Glycobiology#YEAR:1999#;Devlin, TM#TITLE:Textbook of Biochemistry with Clinical Correlations#YEAR:2001#;Orten JM, Neuhaus OW.#TITLE:Human Biochemistry#YEAR:1975#
106	ACGAMK	N-acetylglucosamine kinase	Aminosugar Metabolism	2.7.1.59	( 55577.1 )	0	1000	4	LOCUS:_55577#TRANSCRIPT:1#ABBREVIATION:NAGK#ECNUMBERS:2.7.1.59#	Varki, Cummings, Esko, Freeze, Hart, Marth#TITLE:Essentials of Glycobiology#YEAR:1999#;Hinderlich S, Berger M, Schwarzkopf M, Effertz K, Reutter W#TITLE:Molecular cloning and characterization of murine and human N-acetylglucosamine kinase#JOURNAL:Eur J Biochem#YEAR:2000#PUBMED:10824116#
107	ACGAMPM	phosphoacetylglucosamine mutase	Aminosugar Metabolism	5.4.2.3	( 5238.1 )	-1000	1000	4	NCD	Varki, Cummings, Esko, Freeze, Hart, Marth#TITLE:Essentials of Glycobiology#YEAR:1999#;Devlin, TM#TITLE:Textbook of Biochemistry with Clinical Correlations#YEAR:2001#;Orten JM, Neuhaus OW.#TITLE:Human Biochemistry#YEAR:1975#;Mio T, Yamada-Okabe T, Arisawa M, Yamada-Okabe H#TITLE:Functional cloning and mutational analysis of the human cDNA for phosphoacetylglucosamine mutase: identification of the…
108	ACGAMtly	N-acetyl-glucosamine lysosomal efflux	Transport, Lysosomal			0	1000	2	NCD	Rome LH, Hill DF#TITLE:Lysosomal degradation of glycoproteins and glycosaminoglycans. Efflux and recycling of sulphate and N-acetylhexosamines#JOURNAL:Biochem J#YEAR:1986#PUBMED:3753439#;Jonas AJ, Speller RJ, Conrad PB, Dubinsky WP#TITLE:Transport of N-acetyl-D-glucosamine and N-acetyl-D-galactosamine by rat liver lysosomes#JOURNAL:J Biol Chem#YEAR:1989#PUBMED:2784441#
109	ACGBGBSIDEtg	acgbgbside hs intracellular transport	Transport, Golgi Apparatus			-1000	1000	1	unknown mechanism for transport - however must get to other intracellular compartments (e.g. lysosome for degradation) NJ	Perry RJ, Ridgway ND.#TITLE:Molecular mechanisms and regulation of ceramide transport.#JOURNAL:Biochim Biophys Acta#YEAR:2005#PUBMED:15907394#
110	ACGBGBSIDEtl	acgbgbside hs intracellular transport	Transport, Lysosomal			-1000	1000	1	unknown mechanism for transport - however must get to other intracellular compartments (e.g. lysosome for degradation) NJ	Perry RJ, Ridgway ND.#TITLE:Molecular mechanisms and regulation of ceramide transport.#JOURNAL:Biochim Biophys Acta#YEAR:2005#PUBMED:15907394#
111	ACGPID	N-acetylglucosaminylphosphatidylinositol deacetylase	Glycosylphosphatidylinositol (GPI)-anchor biosynthesis	3.5.1.89	( 9487.1 )	0	1000	4	NCD	Pottekat A, Menon AK#TITLE:Subcellular localization and targeting of N-acetylglucosaminyl phosphatidylinositol de-N-acetylase, the second enzyme in the glycosylphosphatidylinositol biosynthetic pathway#JOURNAL:J Biol Chem#YEAR:2004#PUBMED:14742432#;Watanabe R, Ohishi K, Maeda Y, Nakamura N, Kinoshita T#TITLE:Mammalian PIG-L and its yeast homologue Gpi12p are N-acetylglucosaminylphosphatidylinosit…
112	ACHEe	Acetylcholinesterase	Glycerophospholipid Metabolism	3.1.1.7	( 43.1 ) or ( 43.2 )	0	1000	4	NJ	Shafferman A, Kronman C, Flashner Y, Leitner M, Grosfeld H, Ordentlich A, Gozes Y, Cohen S, Ariel N, Barak D, et al.#TITLE:Mutagenesis of human acetylcholinesterase. Identification of residues involved in catalytic activity and in polypeptide folding.#JOURNAL:J Biol Chem#YEAR:1992#PUBMED:1517212#;Soreq H, Seidman S.#TITLE:Acetylcholinesterase--new roles for an old actor.#JOURNAL:Nat Rev Neurosci#…
113	ACHVESSEC	Acetylcholine secretion via secretory vesicle (ATP driven)	Transport, Extracellular		( 6572.1 )	0	1000	4	SAB This reaction represents the ATP driven secretion of ach from the cell. It leaves out the vesicle because that is not a compartment. ATP:H ratio is assumed as 1:3 for vacuolar ATPase and substrate:h ratio is 1:2. This gives a 3:2 ratio for substrate:ATP	Wagner CA, Finberg KE, Breton S, Marshansky V, Brown D, Geibel JP#TITLE:Renal vacuolar H+-ATPase#JOURNAL:Physiol Rev#YEAR:2004#PUBMED:15383652#;Eiden LE, Schafer MK, Weihe E, Schutz B#TITLE:The vesicular amine transporter family (SLC18): amine/proton antiporters required for vesicular accumulation and regulated exocytotic secretion of monoamines and acetylcholine#JOURNAL:Pflugers Arch#YEAR:2004#P…
114	ACHtn	Acetylcholin transport, nuclear trhough pores	Transport, Nuclear			-1000	1000	1	it
115	ACITL	ATP-Citrate lyase	Citric Acid Cycle		( 47.1 ) or ( 47.2 )	0	100	0	ATP dependent citrate lyase. Reaction is reversible in KEGG (new EC 2.3.3.8) NCD	Elshourbagy NA, Near JC, Kmetz PJ, Sathe GM, Southan C, Strickler JE, Gross M, Young JF, Wells TN, Groot PH.#TITLE:Rat ATP citrate-lyase. Molecular cloning and sequence analysis of a full-length cDNA and mRNA abundance as a function of diet, organ, and age#JOURNAL:J Biol Chem#YEAR:1990#PUBMED:2295639#
116	ACN13ACNGALGBSIDEte	acn13acngalgbside hs transport	Transport, Extracellular			-1000	1000	1	unknown mechanism for transport - intracellular transport occurs, most details are unknown - see for example Varki glycobiology text or numerous reviews (PMID: 8206147) - extracellular transport is also made available since metabolites can get to outer plasma membrane NJ	Varki, Cummings, Esko, Freeze, Hart, Marth#TITLE:Essentials of Glycobiology#YEAR:1999#;Sandhoff K, Klein A.#TITLE:Intracellular trafficking of glycosphingolipids: role of sphingolipid activator proteins in the topology of endocytosis and lysosomal digestion.#JOURNAL:FEBS Lett.#YEAR:1994#PUBMED:8206147#
117	ACN13ACNGALGBSIDEtg	acn13acngalgbside hs intracellular transport	Transport, Golgi Apparatus			-1000	1000	1	unknown mechanism for transport - intracellular transport occurs, most details are unknown - see for example Varki glycobiology text or numerous reviews (PMID: 8206147) NJ	Varki, Cummings, Esko, Freeze, Hart, Marth#TITLE:Essentials of Glycobiology#YEAR:1999#;Sandhoff K, Klein A.#TITLE:Intracellular trafficking of glycosphingolipids: role of sphingolipid activator proteins in the topology of endocytosis and lysosomal digestion.#JOURNAL:FEBS Lett.#YEAR:1994#PUBMED:8206147#
118	ACN23ACNGALGBSIDEte	acn23acngalgbside transport	Transport, Extracellular			-1000	1000	1	unknown mechanism for transport - intracellular transport occurs, most details are unknown - see for example Varki glycobiology text or numerous reviews (PMID: 8206147) - extracellular transport is also made available since metabolites can get to outer plasma membrane NJ	Varki, Cummings, Esko, Freeze, Hart, Marth#TITLE:Essentials of Glycobiology#YEAR:1999#;Sandhoff K, Klein A.#TITLE:Intracellular trafficking of glycosphingolipids: role of sphingolipid activator proteins in the topology of endocytosis and lysosomal digestion.#JOURNAL:FEBS Lett.#YEAR:1994#PUBMED:8206147#
119	ACN23ACNGALGBSIDEtg	acn23acngalgbside intracellular transport	Transport, Golgi Apparatus			-1000	1000	1	unknown mechanism for transport - intracellular transport occurs, most details are unknown - see for example Varki glycobiology text or numerous reviews (PMID: 8206147) NJ	Varki, Cummings, Esko, Freeze, Hart, Marth#TITLE:Essentials of Glycobiology#YEAR:1999#
120	ACNACNGAL14ACGLCGALGLUSIDEte	blood group intracellular transport	Transport, Extracellular			-1000	1000	2	unknown mechanism, however these blood groups need to make it to the extracellular surface of cells NJ
121	ACNACNGAL14ACGLCGALGLUSIDEtg	blood group intracellular transport	Transport, Golgi Apparatus			-1000	1000	2	unknown mechanism, however these blood groups need to make it to the extracellular surface of cells NJ
122	ACNAM9PL	N-Acetylneuraminate 9-phosphate pyruvate-lyase (pyruvate-phosphorylating)	Aminosugar Metabolism		( 54187.1 )	0	1000	4	EC-2.5.1.56 NCD	Varki, Cummings, Esko, Freeze, Hart, Marth#TITLE:Essentials of Glycobiology#YEAR:1999#;Devlin, TM#TITLE:Textbook of Biochemistry with Clinical Correlations#YEAR:2001#;Orten JM, Neuhaus OW.#TITLE:Human Biochemistry#YEAR:1975#;Lawrence SM, Huddleston KA, Pitts LR, Nguyen N, Lee YC, Vann WF, Coleman TA, Betenbaugh MJ#TITLE:Cloning and expression of the human N-acetylneuraminic acid phosphate synthas…
123	ACNAM9PL2	N-Acetylneuraminate 9-phosphate pyruvate-lyase (pyruvate-phosphorylating)	Aminosugar Metabolism		( 54187.1 )	0	1000	4	EC-2.5.1.56 NCD	Lawrence SM, Huddleston KA, Pitts LR, Nguyen N, Lee YC, Vann WF, Coleman TA, Betenbaugh MJ#TITLE:Cloning and expression of the human N-acetylneuraminic acid phosphate synthase gene with 2-keto-3-deoxy-D-glycero- D-galacto-nononic acid biosynthetic ability#JOURNAL:J Biol Chem#YEAR:2000#PUBMED:10749855#
124	ACNAMPH	N-Acetylneuraminate 9-phosphate phosphohydrolase	Aminosugar Metabolism	3.1.3.29		0	1000	2	NCD	Varki, Cummings, Esko, Freeze, Hart, Marth#TITLE:Essentials of Glycobiology#YEAR:1999#
125	ACNAMlt	N-acetylneuraminate transport into lysososme	Transport, Lysosomal		( 26503.1 )	-1000	1000	4	H symport into lysososome. See PMID: 2768261 and PMID: 10581036 ( for human evidence). Sialic acid storage disorders (due to transporter mutations) require import and export e.g. PMID: 2768266 NJ	Mancini GM, de Jonge HR, Galjaard H, Verheijen FW.#TITLE:Characterization of a proton-driven carrier for sialic acid in the lysosomal membrane. Evidence for a group-specific transport system for acidic monosaccharides.#JOURNAL:J Biol Chem#YEAR:1989#PUBMED:2768261#;Verheijen FW, Verbeek E, Aula N, Beerens CE, Havelaar AC, Joosse M, Peltonen L, Aula P, Galjaard H, van der Spek PJ, Mancini GM.#TITLE…
126	ACNAMtn	N-acetylneuraminate nuclear import	Transport, Nuclear			0	1000	1	NCD	Varki, Cummings, Esko, Freeze, Hart, Marth#TITLE:Essentials of Glycobiology#YEAR:1999#
127	ACNGALACGLCGAL14ACGLCGALGLUSIDEte	blood group intracellular transport	Transport, Extracellular			-1000	1000	2	unknown mechanism, however these blood groups need to make it to the extracellular surface of cells NJ
128	ACNGALACGLCGAL14ACGLCGALGLUSIDEtg	blood group intracellular transport	Transport, Golgi Apparatus			-1000	1000	2	unknown mechanism, however these blood groups need to make it to the extracellular surface of cells NJ
129	ACNMLr	N-Acetylneuraminate lyase (reversible)	Aminosugar Metabolism	4.1.3.3		-1000	1000	2	JLR	Varki, Cummings, Esko, Freeze, Hart, Marth#TITLE:Essentials of Glycobiology#YEAR:1999#
130	ACOAD10m	acyl-CoA dehydrogenase (2-methylbutanoyl-CoA), mitochondrial	Valine, Leucine, and Isoleucine Metabolism	1.3.99.12	( 36.1 ) or ( 34.1 )	0	1000	4	MM	Andresen,B.S., Christensen,E., Corydon,T.J., Bross,P., etc.#TITLE:Isolated 2-methylbutyrylglycinuria caused by short/branched-chain acyl-CoA dehydrogenase deficiency....#YEAR:2000#PUBMED:11013134#
131	ACOAD1fm	acyl-CoA dehydrogenase (butanoyl-CoA), mitochondrial	Butanoate Metabolism	1.3.99.2	( 80724.1 ) or ( 36.1 ) or ( 35.1 ) or ( 34.1 ) or ( 84129.1 ) or ( 27034.1 ) or ( 28976.1 )	0	1000	4	Assume NAD/NADH as acceptors Lumped long-chain acyl-CoA dehydrogenase (EC 1.3.99.13) This reaction is therefore equilivalent to trans-2-enoyl-CoA reductase (NAD) (EC 1.3.1.44)	Naito E, Ozasa H, Ikeda Y, Tanaka K.#TITLE:Molecular cloning and nucleotide sequence of complementary DNAs encoding human short chain acyl-coenzyme A dehydrogenase and the study of the molecular basis of human short chain acyl-coenzyme A dehydrogenase deficiency.#JOURNAL:J Clin Invest#YEAR:1985#PUBMED:2565344#
132	ACOAD8m	acyl-CoA dehydrogenase (isovaleryl-CoA), mitochondrial	Valine, Leucine, and Isoleucine Metabolism	1.3.99.10	( 3712.1 )	0	1000	4	MM	Tiffany,K.A., Roberts,D.L., Wang,M., Paschke,R., Mohsen,A.W., Vockley,J., Kim,J.-J.P., #TITLE:Structure of human isovaleryl-CoA dehydrogenase at 2.6-A resolution: structural basis for substrate specificity. .#YEAR:1997#PUBMED:9214289#;Vockley J, Nagao M, Parimoo B, Tanaka K. #TITLE:The variant human isovaleryl-CoA dehydrogenase gene responsible...#YEAR:1992#
133	ACOAD9m	acyl-CoA dehydrogenase (isobutyryl-CoA), mitochondrial	Valine, Leucine, and Isoleucine Metabolism	1.3.99.12	( 34.1 ) or ( 27034.1 )	0	1000	4	MM	Andresen,B.S., Christensen,E., Corydon,T.J., Bross,P., etc.#TITLE:Isolated 2-methylbutyrylglycinuria caused by short/branched-chain acyl-CoA dehydrogenase deficiency....#YEAR:2000#PUBMED:11013134#
134	ACOAHi	acetyl-CoA hydrolase	Pyruvate Metabolism	3.1.2.1	( 134526.1 )	0	1000	0	NCD
135	ACOAO7p	acyl-CoA oxidase (hexadecanoyl-CoA), peroxisomal	Fatty Acid Metabolism	1.3.3.6	( 51.1 ) or ( 51.2 )	0	1000	4	NCD	Varanasi U, Chu R, Chu S, Espinosa R, LeBeau MM, Reddy JK.#TITLE:Isolation of the human peroxisomal acyl-CoA oxidase gene: organization, promoter analysis, and chromosomal localization.#JOURNAL:Proc Natl Acad Sci#YEAR:1994#PUBMED:8159712#;Chu R, Varanasi U, Chu S, Lin Y, Usuda N, Rao MS, Reddy JK.#TITLE:Overexpression and characterization of the human peroxisomal acyl-CoA oxidase in insect cells.…
136	ACONTm	Aconitate hydratase	Citric Acid Cycle	4.2.1.3	( 50.1 )	-1000	1000	0	IF
137	ACOX22x	acyl-Coenzyme A oxidase 2, branched chain	Bile Acid Biosynthesis	1.3.3.6	( 8309.1 )	0	1000	2	noted in uniprot to have FAD as cofactor - further reaction specific lit evidence not found to support or contradict, see Baumgart et al PNAS (1996) 93: 13748-13753 analog as per KEGG added NJ	Russell DW#TITLE:The enzymes, regulation, and genetics of bile acid synthesis#JOURNAL:Annu Rev Biochem#YEAR:2003#;Baumgartner MR, Almashanu S, Suormala T, Obie C, Cole RN, Packman S, Baumgartner ER, Valle D. #TITLE:The molecular basis of human 3-methylcrotonyl-CoA carboxylase deficiency.#YEAR:2001#PUBMED:11181649#
138	ACOX2x	acyl-Coenzyme A oxidase 2, branched chain	Bile Acid Biosynthesis	1.3.3.6	( 8309.1 )	0	1000	4	noted in uniprot to have FAD as cofactor - further reaction specific lit evidence not found to support or contradict, see Baumgart et al PNAS (1996) 93: 13748-13753 NJ	Russell DW#TITLE:The enzymes, regulation, and genetics of bile acid synthesis#JOURNAL:Annu Rev Biochem#YEAR:2003#;Baumgart E, Vanhooren JCT, Fransen M, Marynen P, Puype M, Vandekerckhove J, Leunissen JAM, Fahimi HD, Mannaerts GP, Veldhoven PP#TITLE:Molecular characterization of the human peroxisomal branched-chain acyl-CoA oxidase#JOURNAL:Proc Natl Acad Sci#YEAR:1996#
139	ACP1_FMN	acid phosphatase (FMN)	Riboflavin Metabolism	3.1.3.2	( 52.1 ) or ( 52.3 ) or ( 52.2 )	0	1000	2	LOCUS:_52#TRANSCRIPT:1#ABBREVIATION:ACP1#ECNUMBERS:3.1.3.2#
140	ACRNtm	O-acetylcarnintine transport into mitochondria via diffusion	Transport, Mitochondrial		( 788.1 )	0	1000	4	NCD	Palmieri, F.#TITLE: The mitochondrial transporter family (SLC25): physiological and pathological implications.#JOURNAL: Pflugers Archive#YEAR:2004#PUBMED:14598172#;Pande SV, Parvin R.#TITLE:Characterization of carnitine acylcarnitine translocase system of heart mitochondria.#JOURNAL:J Biol Chem#YEAR:1976#PUBMED:977593#
141	ACS	acetyl-CoA synthetase	Glycolysis/Gluconeogenesis	6.2.1.1	( 65985.1 ) or ( 55902.2 ) or ( 55902.1 )	0	1000	4	LOCUS:_65985#TRANSCRIPT:1#ABBREVIATION:AACS#ECNUMBERS:6.2.1.16#	Ohgami M, Takahashi N, Yamasaki M, Fukui T#TITLE:Expression of acetoacetyl-CoA synthetase, a novel cytosolic ketone body-utilizing enzyme, in human brain#JOURNAL:Biochem Pharmacol#YEAR:2003#PUBMED:12623130#;Luong A, Hannah VC, Brown MS, Goldstein JL#TITLE:Molecular characterization of human acetyl-CoA synthetase, an enzyme regulated by sterol regulatory element-binding proteins#JOURNAL:J Biol Che…
142	ACS2	acetyl-CoA synthase (propionate)	Propanoate Metabolism	6.2.1.1	( 55902.1 ) or ( 65985.1 ) or ( 55902.2 )	0	1000	4	AMF	Ohgami M, Takahashi N, Yamasaki M, Fukui T#TITLE:Expression of acetoacetyl-CoA synthetase, a novel cytosolic ketone body-utilizing enzyme, in human brain#JOURNAL:Biochem Pharmacol#YEAR:2003#PUBMED:12623130#;Devlin, TM#TITLE:Textbook of Biochemistry with Clinical Correlations#YEAR:2001#;Luong A, Hannah VC, Brown MS, Goldstein JL#TITLE:Molecular characterization of human acetyl-CoA synthetase, an e…
143	ACTNMO	acetone monooxygenase	Pyruvate Metabolism		( 1571.1 )	0	1000	4	stoichiometry described in Thornalley PJ. Gen Pharmacol. 1996 Jun;27(4):565-73. PMID: 8853285 NCD	Vander Jagt DL, Robinson B, Taylor KK, Hunsaker LA.#TITLE:Reduction of trioses by NADPH-dependent aldo-keto reductases. Aldose reductase, methylglyoxal, and diabetic complications#JOURNAL:J Biol Chem#YEAR:1992#PUBMED:1537826#;Thornalley PJ#TITLE:Pharmacology of methylglyoxal: formation, modification of proteins and nucleic acids, and enzymatic detoxification--a role in pathogenesis and antiprolif…
144	ACt2m	acetate mitochondrial transport via proton symport	Transport, Mitochondrial			0	0	2	NCD	Casal M, Paiva S, Andrade RP, Gancedo C, Leao C.#TITLE:The lactate-proton symport of Saccharomyces cerevisiae is encoded by JEN1.#JOURNAL:J Bacteriol#YEAR:1999#PUBMED:10198029#;Wolfe AJ.#TITLE:The acetate switch#JOURNAL:Microbiol Mol Biol Rev#YEAR:2005#PUBMED:15755952#
145	ACtg	acetate transport, Golgi apparatus	Transport, Golgi Apparatus			-1000	1000	2	NCD	Wolfe AJ.#TITLE:The acetate switch#JOURNAL:Microbiol Mol Biol Rev#YEAR:2005#PUBMED:15755952#
146	ADA	Adenosine deaminase	Purine Catabolism	3.5.4.4	( 100.1 )	0	0	4	Added EC- JLR	Gonzalez-Gronow M, Hershfield MS, Arredondo-Vega FX, Pizzo SV.#TITLE:Cell surface adenosine deaminase binds and stimulates plasminogen activation on 1-LN human prostate cancer cells.#JOURNAL:J Biol Chem#YEAR:2004#PUBMED:15016824#;Iwaki-Egawa S, Watanabe Y.#TITLE:Characterization and purification of adenosine deaminase 1 from human and chicken liver.#JOURNAL:Comp Biochem Physiol B Biochem Mol Biol…
147	ADAe	Adenosine deaminase, extracellular	Nucleotides	3.5.4.4	( 100.1 )	0	0	4	adenosine deaminase has been found on cell surface in human (Gonzales-Gronow et al, JBC, 2004,279,20993-20998). IT	Gonzalez-Gronow M, Hershfield MS, Arredondo-Vega FX, Pizzo SV.#TITLE:Cell surface adenosine deaminase binds and stimulates plasminogen activation on 1-LN human prostate cancer cells.#JOURNAL:J Biol Chem#YEAR:2004#PUBMED:15016824#;Iwaki-Egawa S, Watanabe Y.#TITLE:Characterization and purification of adenosine deaminase 1 from human and chicken liver.#JOURNAL:Comp Biochem Physiol B Biochem Mol Biol…
148	ADCim	Acetoacetate decarboxylation (irreversible), mitochondrial	Propanoate Metabolism	4.1.1.4		0	1000	2	TDV (Voet &amp; Voet pg 581) Non-enzymatic decarboxylation; spontaneous reaction added &quot;m&quot; suffix - NCD	Devlin, TM#TITLE:Textbook of Biochemistry with Clinical Correlations#YEAR:2001#;Orten JM, Neuhaus OW.#TITLE:Human Biochemistry#YEAR:1975#
149	ADEt	adenine reversible transport, cytosol	Transport, Extracellular		( 3177.1 )	-1000	1000	4	NCD	Baldwin SA, Beal PR, Yao SY, King AE, Cass CE, Young JD.#TITLE:The equilibrative nucleoside transporter family, SLC29.#JOURNAL:Pflugers Arch. #YEAR:2004#PUBMED:12838422#;Yao SY, Ng AM, Vickers MF, Sundaram M, Cass CE, Baldwin SA, Young JD.#TITLE:Functional and molecular characterization of nucleobase transport by recombinant human and rat equilibrative nucleoside transporters 1 and 2.#JOURNAL:J B…
150	ADK1	adenylate kinase	Nucleotides	2.7.4.3	( 122481.1 ) or ( 203.1 ) or ( 26289.1 ) or ( 26289.2 )	-1000	1000	4	Inorganic triphosphate can also act as donor	Matsuura S, Igarashi M, Tanizawa Y, Yamada M, Kishi F, Kajii T, Fujii H, Miwa S, Sakurai M, Nakazawa A.#TITLE:Human adenylate kinase deficiency associated with hemolytic anemia. A single base substitution affecting solubility and catalytic activity of the cytosolic adenylate kinase.#JOURNAL:J Biol Chem. #YEAR:1989#PUBMED:2542324#;Zuffardi O, Caiulo A, Maraschio P, Tupler R, Bianchi E, Amisano P, …
151	ADK1m	adenylate kinase, mitochondrial	Nucleotides	2.7.4.3	( 205.3 ) or ( 205.1 ) or ( 204.1 ) or ( 204.3 ) or ( 204.2 ) or ( 205.2 )	-1000	1000	4	NCD	Noma T, Song S, Yoon YS, Tanaka S, Nakazawa A. #TITLE:cDNA cloning and tissue-specific expression of the gene encoding human adenylate kinase isozyme 2. #JOURNAL:Biochim Biophys Acta. #YEAR:1998#PUBMED:9434148#;Lee Y, Kim JW, Lee IA, Kang HB, Choe YK, Lee HG, Lim JS, Kim HJ, Park C, Choe IS.#TITLE:Cloning and characterization of cDNA for human adenylate kinase 2A.#JOURNAL:Biochem Mol Biol Int. #Y…
152	ADK3m	adentylate kinase (GTP)	Nucleotides		( 50808.1 )	-1000	1000	4	NCD	Noma T, Fujisawa K, Yamashiro Y, Shinohara M, Nakazawa A, Gondo T, Ishihara T, Yoshinobu K.#TITLE:Structure and expression of human mitochondrial adenylate kinase targeted to the mitochondrial matrix. #JOURNAL:Biochem J.#YEAR:2001#PUBMED:11485571#
153	ADMDC	adenosylmethionine decarboxylase	Arginine and Proline Metabolism	4.1.1.50	( 262.1 )	0	1000	4	LOCUS:_262#TRANSCRIPT:1#ABBREVIATION:AMD1#ECNUMBERS:4.1.1.50#	Pajunen A, Crozat A, Janne OA, Ihalainen R, Laitinen PH, Stanley B, Madhubala R, Pegg AE#TITLE:Structure and regulation of mammalian S-adenosylmethionine decarboxylase#JOURNAL:J Biol Chem#YEAR:1988#PUBMED:2460457#
154	ADNCYC	adenylate cyclase	Nucleotides	4.6.1.1	( 112.1 ) or ( 55811.1 ) or ( 109.1 ) or ( 112.2 ) or ( 114.1 ) or ( 108.1 ) or ( 113.1 ) or ( 107.1 ) or ( 196883.1 ) or ( 115.1 ) or ( 111.1 )	0	1000	4	JLR	Ding Q, Gros R, Chorazyczewski J, Ferguson SS, Feldman RD. #TITLE:Isoform-specific regulation of adenylyl cyclase function by disruption of membrane trafficking.#JOURNAL:Mol Pharmacol.#YEAR:2005#PUBMED:15547246#;Ludwig MG, Seuwen K. #TITLE:Characterization of the human adenylyl cyclase gene family: cDNA, gene structure, and tissue distribution of the nine isoforms. #JOURNAL:J Recept Signal Transd…
155	ADNK1	adenosine kinase	Nucleotides	2.7.1.20	( 132.1 ) or ( 132.2 )	0	1000	4	_2-Aminoadenosine can also act as acceptor	McNally T, Helfrich RJ, Cowart M, Dorwin SA, Meuth JL, Idler KB, Klute KA, Simmer RL, Kowaluk EA, Halbert DN. #TITLE:Cloning and expression of the adenosine kinase gene from rat and human tissues.#JOURNAL:Biochem Biophys Res Commun#YEAR:1997#PUBMED:9070863#
156	ADNt	adenosine facilated transport in cytosol	Transport, Extracellular		( 3177.1 ) or ( 2030.1 )	-1000	1000	4	IT	Baldwin SA, Beal PR, Yao SY, King AE, Cass CE, Young JD.#TITLE:The equilibrative nucleoside transporter family, SLC29.#JOURNAL:Pflugers Arch. #YEAR:2004#PUBMED:12838422#;Ward JL, Sherali A, Mo ZP, Tse CM.#TITLE:Kinetic and pharmacological properties of cloned human equilibrative nucleoside transporters, ENT1 and ENT2, stably expressed in nucleoside transporter-deficient PK15 cells.#JOURNAL:J Biol…
157	ADNt4	adenosine transport (Na/Adn cotransport)	Transport, Extracellular		( 9154.2 ) or ( 9154.1 ) or ( 64078.1 ) or ( 9153.1 )	0	1000	4	MM	Gray JH, Owen RP, Giacomini KM.#TITLE:The concentrative nucleoside transporter family, SLC28. #YEAR:2004#PUBMED:12856181#
158	ADNtm	adenosine facilated transport in mitochondria	Transport, Mitochondrial		( 2030.1 )	-1000	1000	4	IT	Lai Y, Tse CM, Unadkat JD.#TITLE:Mitochondrial expression of the human equilibrative nucleoside transporter 1 (hENT1) results in enhanced mitochondrial toxicity of antiviral drugs.#JOURNAL:J Biol Chem. #YEAR:2004#PUBMED:14607828#;Baldwin SA, Beal PR, Yao SY, King AE, Cass CE, Young JD.#TITLE:The equilibrative nucleoside transporter family, SLC29.#JOURNAL:Pflugers Arch. #YEAR:2004#PUBMED:12838422#…
159	ADPGLC	ADPglucose diphosphatase	Nucleotides	3.6.1.21	( 11164.1 )	0	1000	4	Based on Yang et al, JBC, 2000, 275, 8844-8853	Yang H, Slupska MM, Wei YF, Tai JH, Luther WM, Xia YR, Shih DM, Chiang JH, Baikalov C, Fitz-Gibbon S, Phan IT, Conrad A, Miller JH.#TITLE:Cloning and characterization of a new member of the Nudix hydrolases from human and mouse.#JOURNAL:J Biol Chem#YEAR:2000#PUBMED:10722730#;Ishibashi T, Hayakawa H, Sekiguchi M.#TITLE:A novel mechanism for preventing mutations caused by oxidation of guanine nucle…
160	ADPMAN	ADPmannose diphosphatase	Nucleotides	3.6.1.21	( 11164.1 )	0	1000	4	Based on Yang et al, JBC, 2000, 275, 8844-8853 IT	Yang H, Slupska MM, Wei YF, Tai JH, Luther WM, Xia YR, Shih DM, Chiang JH, Baikalov C, Fitz-Gibbon S, Phan IT, Conrad A, Miller JH.#TITLE:Cloning and characterization of a new member of the Nudix hydrolases from human and mouse.#JOURNAL:J Biol Chem#YEAR:2000#PUBMED:10722730#;Ishibashi T, Hayakawa H, Sekiguchi M.#TITLE:A novel mechanism for preventing mutations caused by oxidation of guanine nucle…
161	ADPRDP	ADPribose diphosphatase	Nucleotides	3.6.1.13	( 11164.1 )	0	1000	4	LOCUS:_11164#TRANSCRIPT:1#ABBREVIATION:NUDT5#	Yang H, Slupska MM, Wei YF, Tai JH, Luther WM, Xia YR, Shih DM, Chiang JH, Baikalov C, Fitz-Gibbon S, Phan IT, Conrad A, Miller JH.#TITLE:Cloning and characterization of a new member of the Nudix hydrolases from human and mouse.#JOURNAL:J Biol Chem#YEAR:2000#PUBMED:10722730#;Ishibashi T, Hayakawa H, Sekiguchi M.#TITLE:A novel mechanism for preventing mutations caused by oxidation of guanine nucle…
162	ADPtx	ADP transporter, peroxisomal	Transport, Peroxisomal			-1000	1000	1	most likely NOT physiological - detailed information about the peroxisomal transporters has not yet been achieved - this transport is most likely dependent on a concomitant energy consuming reaction (human ABC peroxisomal transporters: PEX family - check in future for new research articles describing biochemistry and stoichiometry) NJ
163	ADRNCOAtx	fatty acid intracellular transport	Transport, Peroxisomal			-1000	1000	2	interaction between peroxisomes and ER (some enzymes on the outer membrane) NJ	Sprecher H#TITLE:An update on the pathways of polyunsaturated fatty acid metabolism#JOURNAL:Curr Opn in Clinical Nutrition and Metabolic Care#YEAR:1999#
164	ADRNCPT1	carnitine O-palmitoyltransferase	Carnitine shuttle	2.3.1.21	( 1375.1 ) or ( 1375.3 ) or ( 1375.4 ) or ( 126129.1 ) or ( 1374.1 ) or ( 1375.2 )	0	1000	4	NJ
165	ADRNCPT2	carnitine transferase	Carnitine shuttle		( 1376.1 )	0	1000	4	NJ
166	ADRNCRNt	transport into the mitochondria (carnitine)	Carnitine shuttle		( 788.1 ) or ( 788.1 )	0	1000	4	NJ
167	ADRNLPVESSEC	Adrenaline secretion via secretory vesicle (ATP driven)	Transport, Extracellular		( 6570.1 ) or ( 6571.1 )	0	1000	4	SAB This reaction represents the ATP driven secretion of adrnl from the cell. It leaves out the vesicle because that is not a compartment. ATP:H ratio is assumed as 1:3 for vacuolar ATPase and substrate:h ratio is 1:2. This gives a 3:2 ratio for substrate:ATP	Wagner CA, Finberg KE, Breton S, Marshansky V, Brown D, Geibel JP#TITLE:Renal vacuolar H+-ATPase#JOURNAL:Physiol Rev#YEAR:2004#PUBMED:15383652#;Eiden LE, Schafer MK, Weihe E, Schutz B#TITLE:The vesicular amine transporter family (SLC18): amine/proton antiporters required for vesicular accumulation and regulated exocytotic secretion of monoamines and acetylcholine#JOURNAL:Pflugers Arch#YEAR:2004#P…
168	ADSK	adenylyl-sulfate kinase	Nucleotides	2.7.1.25	( 9060.1 ) or ( 9061.1 )	0	1000	4	LOCUS:_9061#TRANSCRIPT:1#ABBREVIATION:PAPSS1#ECNUMBERS:2.7.1.25,2.7.7.4#	Venkatachalam KV.#TITLE:Human 3&apos;-phosphoadenosine 5&apos;-phosphosulfate (PAPS) synthase: biochemistry, molecular biology and genetic deficiency.#JOURNAL:IUBMB Life. #YEAR:2003#PUBMED:12716056#;Fuda H, Shimizu C, Lee YC, Akita H, Strott CA.#TITLE:Characterization and expression of human bifunctional 3&apos;-phosphoadenosine 5&apos;-phosphosulphate synthase isoforms. #JOURNAL:Biochem J.#YEAR:…
169	ADSL1	adenylosuccinate lyase	Nucleotides	4.3.2.2	( 158.1 ) or ( 158.2 )	0	1000	4	LOCUS:_158#TRANSCRIPT:1#ABBREVIATION:ADSL#ECNUMBERS:4.3.2.2#	Barton JW, Hart IM, Patterson D.#TITLE:Mapping of a locus correcting lack of phosphoribosylaminoimidazole carboxylase activity in Chinese hamster ovary cell Ade-D mutants to human chromosome 4. #JOURNAL:Genomics#YEAR:1991#PUBMED:2004782#;Stone RL, Aimi J, Barshop BA, Jaeken J, Van den Berghe G, Zalkin H, Dixon JE.#TITLE:A mutation in adenylosuccinate lyase associated with mental retardation and a…
170	ADSL2	adenylosuccinate lyase	IMP Biosynthesis	4.3.2.2	( 158.1 ) or ( 158.2 )	0	1000	4	LOCUS:_158#TRANSCRIPT:1#ABBREVIATION:ADSL#ECNUMBERS:4.3.2.2#	Barton JW, Hart IM, Patterson D.#TITLE:Mapping of a locus correcting lack of phosphoribosylaminoimidazole carboxylase activity in Chinese hamster ovary cell Ade-D mutants to human chromosome 4. #JOURNAL:Genomics#YEAR:1991#PUBMED:2004782#;Stone RL, Aimi J, Barshop BA, Jaeken J, Van den Berghe G, Zalkin H, Dixon JE.#TITLE:A mutation in adenylosuccinate lyase associated with mental retardation and a…
171	ADSS	adenylosuccinate synthase	Nucleotides	6.3.4.4	( 159.1 ) or ( 122622.1 ) or ( 122622.2 )	0	1000	2	LOCUS:_159#TRANSCRIPT:1#ABBREVIATION:ADSS#ECNUMBERS:6.3.4.4#
172	AFLATOXINte	xenobiotic transport	Transport, Extracellular			-1000	1000	2	unknown mechanism, related cyp P450 metabolism reactions NJ
173	AG13T1g	N-acetyllactosaminide beta-1,3-N-acetylglucosaminyltransferase, Golgi apparatus	Keratan sulfate biosynthesis	2.4.1.149	( 11041.1 ) or ( 10678.1 ) or ( 93010.1 ) or ( 374907.2 ) or ( 374907.1 ) or ( 146712.1 ) or ( 10331.1 ) or ( 10678.2 ) or ( 79369.1 )	0	1000	4	NCD	Varki, Cummings, Esko, Freeze, Hart, Marth#TITLE:Essentials of Glycobiology#YEAR:1999#;Shiraishi N, Natsume A, Togayachi A, Endo T, Akashima T, Yamada Y, Imai N, Nakagawa S, Koizumi S, Sekine S, Narimatsu H, Sasaki K#TITLE:Identification and characterization of three novel beta 1,3-N-acetylglucosaminyltransferases structurally related to the beta 1,3-galactosyltransferase family#JOURNAL:J Biol Ch…
174	AG13T2g	N-acetyllactosaminide beta-1,3-N-acetylglucosaminyltransferase, Golgi apparatus	Keratan sulfate biosynthesis	2.4.1.149	( 79369.1 ) or ( 374907.1 ) or ( 11041.1 ) or ( 146712.1 ) or ( 374907.2 ) or ( 93010.1 ) or ( 10331.1 ) or ( 10678.1 ) or ( 10678.2 )	0	1000	4	NCD	Varki, Cummings, Esko, Freeze, Hart, Marth#TITLE:Essentials of Glycobiology#YEAR:1999#;Shiraishi N, Natsume A, Togayachi A, Endo T, Akashima T, Yamada Y, Imai N, Nakagawa S, Koizumi S, Sekine S, Narimatsu H, Sasaki K#TITLE:Identification and characterization of three novel beta 1,3-N-acetylglucosaminyltransferases structurally related to the beta 1,3-galactosyltransferase family#JOURNAL:J Biol Ch…
175	AG13T3g	N-acetyllactosaminide beta-1,3-N-acetylglucosaminyltransferase, Golgi apparatus	Keratan sulfate biosynthesis	2.4.1.149	( 10331.1 ) or ( 11041.1 ) or ( 374907.2 ) or ( 10678.1 ) or ( 79369.1 ) or ( 374907.1 ) or ( 10678.2 ) or ( 93010.1 ) or ( 146712.1 )	0	1000	4	NCD	Varki, Cummings, Esko, Freeze, Hart, Marth#TITLE:Essentials of Glycobiology#YEAR:1999#;Shiraishi N, Natsume A, Togayachi A, Endo T, Akashima T, Yamada Y, Imai N, Nakagawa S, Koizumi S, Sekine S, Narimatsu H, Sasaki K#TITLE:Identification and characterization of three novel beta 1,3-N-acetylglucosaminyltransferases structurally related to the beta 1,3-galactosyltransferase family#JOURNAL:J Biol Ch…
176	AGMTm	agmatinase (m)	Arginine and Proline Metabolism	3.5.3.11	( 79814.1 )	0	1000	4	SAB m	Mistry SK, Burwell TJ, Chambers RM, Rudolph-Owen L, Spaltmann F, Cook WJ, Morris SM Jr.#TITLE:Cloning of human agmatinase. An alternate path for polyamine synthesis induced in liver by hepatitis B virus.#JOURNAL:Am J Physiol Gastrointest Liver Physiol#YEAR:2002#PUBMED:11804860#;Iyer RK, Kim HK, Tsoa RW, Grody WW, Cederbaum SD.#TITLE:Cloning and characterization of human agmatinase.#JOURNAL:Mol Ge…
177	AGPAT1	1-acylglycerol-3-phosphate O-acyltransferase 1	Triacylglycerol Synthesis	2.3.1.51	( 10555.1 ) or ( 137964.1 ) or ( 56895.1 ) or ( 56894.2 ) or ( 56894.1 ) or ( 55326.1 ) or ( 10554.1 )	0	1000	4	FULLR corresponds to acyl/R groups in texts. NJ	Voet D, Voet JG#TITLE:Biochemistry#YEAR:1995#;Coleman RA, Lee DP#TITLE:Enzymes of triacylglycerol synthesis and their regulation#JOURNAL:Prog in Lipid Research#YEAR:2004#
178	AGTim	alanine-glyoxylate transaminase (irreversible), mitochondrial	Alanine and Aspartate Metabolism	2.6.1.44	( 64902.1 ) or ( 64850.1 )	0	0	4	NCD	Holmes RP, Assimos DG#TITLE:Glyoxylate synthesis, and its modulation and influence on oxalate synthesis#JOURNAL:J Urol#YEAR:1998#PUBMED:9783918#;Baker PR, Cramer SD, Kennedy M, Assimos DG, Holmes RP.#TITLE:Glycolate and glyoxylate metabolism in HepG2 cells.#YEAR:2004#PUBMED:15240345#;Poore RE, Hurst CH, Assimos DG, Holmes RP#TITLE:Pathways of hepatic oxalate synthesis and their regulation#JOURNAL…
179	AGTix	alanine-glyoxylate transaminase (irreversible), (peroxisomal)	Alanine and Aspartate Metabolism	2.6.1.44	( 189.1 )	0	1000	4	NCD	Holmes RP, Assimos DG#TITLE:Glyoxylate synthesis, and its modulation and influence on oxalate synthesis#JOURNAL:J Urol#YEAR:1998#PUBMED:9783918#;Purdue PE, Takada Y, Danpure CJ.#TITLE:Identification of mutations associated with peroxisome-to-mitochondrion mistargeting of alanine/glyoxylate aminotransferase in primary hyperoxaluria type 1.#YEAR:1990#PUBMED:1703535#;Poore RE, Hurst CH, Assimos DG, …
180	AHC	adenosylhomocysteinase	Methionine and cysteine metabolism	3.3.1.1	( 191.1 ) or ( 10768.2 ) or ( 10768.1 )	-1000	1000	4	LOCUS:_191#TRANSCRIPT:1#ABBREVIATION:AHCY#ECNUMBERS:3.3.1.1#	Yang X, Hu Y, Yin DH, Turner MA, Wang M, Borchardt RT, Howell PL, Kuczera K, Schowen RL.#TITLE:Catalytic strategy of S-adenosyl-L-homocysteine hydrolase: transition-state stabilization and the avoidance of abortive reactions.#YEAR:2003#PUBMED:12590576#;Coulter-Karis DE, Hershfield MS.#TITLE:Sequence of full length cDNA for human S-adenosylhomocysteine hydrolase.#YEAR:1989#PUBMED:2596825#
181	AHEXASE2ly	beta-N-acetylhexosaminidase, lysosomal	N-Glycan Degradation	3.2.1.52	( 3074.1 ) or ( 3073.1 ) or ( 3073.1 and 3074.1 )	0	1000	4	NCD	Maier T, Strater N, Schuette CG, Klingenstein R, Sandhoff K, Saenger W.#TITLE:The X-ray crystal structure of human beta-hexosaminidase B provides new insights into Sandhoff disease#JOURNAL:J Mol Biol#YEAR:2003#PUBMED:12706724#;Liu B, Ahmad W, Aronson NN Jr#TITLE:Structure of the human gene for lysosomal di-N-acetylchitobiase#JOURNAL:Glycobiology#YEAR:1999#PUBMED:10336991#;Hepbildikler ST, Sandhof…
182	AHEXASEly	beta-N-acetylhexosaminidase, lysosomal	N-Glycan Degradation	3.2.1.52	( 3073.1 ) or ( 3074.1 ) or ( 3073.1 and 3074.1 )	0	1000	4	NCD	Maier T, Strater N, Schuette CG, Klingenstein R, Sandhoff K, Saenger W.#TITLE:The X-ray crystal structure of human beta-hexosaminidase B provides new insights into Sandhoff disease#JOURNAL:J Mol Biol#YEAR:2003#PUBMED:12706724#;Liu B, Ahmad W, Aronson NN Jr#TITLE:Structure of the human gene for lysosomal di-N-acetylchitobiase#JOURNAL:Glycobiology#YEAR:1999#PUBMED:10336991#;Hepbildikler ST, Sandhof…
183	AICART	phosphoribosylaminoimidazolecarboxamide formyltransferase	IMP Biosynthesis	2.1.2.3	( 471.1 )	-1000	1000	4	LOCUS:_471#TRANSCRIPT:1#ABBREVIATION:ATIC#	Cheong CG, Wolan DW, Greasley SE, Horton PA, Beardsley GP, Wilson IA.#TITLE:Crystal structures of human bifunctional enzyme aminoimidazole-4-carboxamide ribonucleotide transformylase/IMP cyclohydrolase in complex with potent sulfonyl-containing antifolates.#JOURNAL:J Biol Chem#YEAR:2004#PUBMED:14966129#;Bulock KG, Beardsley GP, Anderson KS.#TITLE:The kinetic mechanism of the human bifunctional en…
184	AIRCr	phosphoribosylaminoimidazole carboxylase	IMP Biosynthesis	4.1.1.21	( 10606.1 )	-1000	1000	4	NCD	Brayton KA, Chen Z, Zhou G, Nagy PL, Gavalas A, Trent JM, Deaven LL, Dixon JE, Zalkin H. #TITLE:Two genes for de novo purine nucleotide synthesis on human chromosome 4 are closely linked and divergently transcribed.#JOURNAL:J Biol Chem. #YEAR:1994#PUBMED:8106516#;Minet M, Lacroute F.#TITLE:Cloning and sequencing of a human cDNA coding for a multifunctional polypeptide of the purine pathway by com…
185	AKGDm	2-oxoglutarate dehydrogenase	Citric Acid Cycle	1.2.4.2	( 4967.2 ) and ( 1738.1 and 8050.1 ) and ( 1743.1 ) or ( 4967.1 ) and ( 1738.1 and 8050.1 ) and ( 1743.1 )	0	1000	0	EC taken from Ligand TV	Orten JM, Neuhaus OW.#TITLE:Human Biochemistry#YEAR:1975#
186	AKR1C41	aldo-keto reductase family 1, member C4 (chlordecone reductase; 3-alpha hydroxysteroid dehydrogenase, type I; dihydrodiol dehydrogenase 4)	Bile Acid Biosynthesis	1.1.1.50	( 1109.1 )	0	1000	4	NJ	Russell DW#TITLE:The enzymes, regulation, and genetics of bile acid synthesis#JOURNAL:Annu Rev Biochem#YEAR:2003#
187	AKR1C42	aldo-keto reductase family 1, member C4 (chlordecone reductase; 3-alpha hydroxysteroid dehydrogenase, type I; dihydrodiol dehydrogenase 4)	Bile Acid Biosynthesis	1.1.1.50	( 1109.1 )	0	1000	4	NJ	Russell DW#TITLE:The enzymes, regulation, and genetics of bile acid synthesis#JOURNAL:Annu Rev Biochem#YEAR:2003#
188	AKR1D	aldo-keto reductase family 1, member D1 (delta 4-3-ketosteroid-5-beta-reductase)	Bile Acid Biosynthesis		( 6718.1 )	0	1000	4	refs: uniprot, KEGG DW Russell bile acid synthesis review paper (see human recon journal citations) NJ	Russell DW#TITLE:The enzymes, regulation, and genetics of bile acid synthesis#JOURNAL:Annu Rev Biochem#YEAR:2003#
189	AKR1D2	aldo-keto reductase family 1, member D1 (delta 4-3-ketosteroid-5-beta-reductase)	Bile Acid Biosynthesis		( 6718.1 )	0	1000	4	refs: uniprot, KEGG DW Russell bile acid synthesis review paper (see human recon journal citations) NJ	Russell DW#TITLE:The enzymes, regulation, and genetics of bile acid synthesis#JOURNAL:Annu Rev Biochem#YEAR:2003#
190	ALADGLYexR	D-alanine/glycine reversible exchange	Transport, Extracellular		( 56301.1 ) and ( 6520.1 )	0	0	2	SAB many other exchanges possible	Verrey F, Closs EI, Wagner CA, Palacin M, Endou H, Kanai Y#TITLE:CATs and HATs: the SLC7 family of amino acid transporters#JOURNAL:Pflugers Arch#YEAR:2004#PUBMED:14770310#;Fukasawa Y, Segawa H, Kim JY, Chairoungdua A, Kim DK, Matsuo H, Cha SH, Endou H, Kanai Y#TITLE:Identification and characterization of a Na(+)-independent neutral amino acid transporter that associates with the 4F2 heavy chain a…
191	ALAR	alanine racemase	Alanine and Aspartate Metabolism	5.1.1.1	( 11212.1 )	-1000	1000	1	LOCUS:_11212#TRANSCRIPT:1#ABBREVIATION:PROSC#
192	ALASm	5-aminolevulinate synthase	Glycine, Serine, and Threonine Metabolism	2.3.1.37	( 212.1 ) or ( 23464.1 ) or ( 211.2 ) or ( 211.1 )	0	1000	2	NCD	Bishop DF.#TITLE:Two different genes encode delta-aminolevulinate synthase in humans: nucleotide sequences of cDNAs for the housekeeping and erythroid genes. #YEAR:1990#PUBMED:2263504#
193	ALATA_L	L-alanine transaminase	Glutamate metabolism	2.6.1.2	( 2875.1 ) or ( 84706.1 )	0	100	4	LOCUS:_2875#TRANSCRIPT:1#ABBREVIATION:GPT1#ECNUMBERS:2.6.1.2#	Yang RZ, Blaileanu G, Hansen BC, Shuldiner AR, Gong DW.#TITLE:cDNA cloning, genomic structure, chromosomal mapping, and functional expression of a novel human alanine aminotransferase.#JOURNAL:Genomics#YEAR:2002#PUBMED:11863375#
194	ALAt2r	L-alanine reversible transport via proton symport	Transport, Extracellular		( 206358.1 )	-1000	1000	2	NCD	Sagne C, Agulhon C, Ravassard P, Darmon M, Hamon M, El Mestikawy S, Gasnier B, Giros B#TITLE:Identification and characterization of a lysosomal transporter for small neutral amino acids#JOURNAL:Proc Natl Acad Sci U S A#YEAR:2001#PUBMED:11390972#;Boll M, Foltz M, Rubio-Aliaga I, Kottra G, Daniel H#TITLE:Functional characterization of two novel mammalian electrogenic proton-dependent amino acid cot…
195	ALAt4	Alanine-Sodium symporter	Transport, Extracellular		( 54407.1 ) or ( 6542.1 ) or ( 11254.1 ) or ( 6541.1 ) or ( 81539.1 ) or ( 55089.1 ) or ( 84889.1 )	0	1000	4	tv Mendz pg. 201 Reversibility is unclear.	Gu S, Adan-Rice D, Leach RJ, Jiang JX#TITLE:A novel human amino acid transporter, hNAT3: cDNA cloning, chromosomal mapping, genomic structure, expression, and functional characterization#JOURNAL:Genomics#YEAR:2001#PUBMED:11414754#;Hatanaka T, Huang W, Ling R, Prasad PD, Sugawara M, Leibach FH, Ganapathy V#TITLE:Evidence for the transport of neutral as well as cationic amino acids by ATA3, a novel…
196	ALAtN1	Alanine transport (Na, H coupled)	Transport, Extracellular		( 92745.1 ) or ( 10991.1 )	-1000	1000	4	SAB based om PMID 10823827	Fei YJ, Sugawara M, Nakanishi T, Huang W, Wang H, Prasad PD, Leibach FH, Ganapathy V#TITLE:Primary structure, genomic organization, and functional and electrogenic characteristics of human system N 1, a Na+- and H+-coupled glutamine transporter#JOURNAL:J Biol Chem#YEAR:2000#PUBMED:10823827#;Mackenzie B, Erickson JD#TITLE:Sodium-coupled neutral amino acid (System N/A) transporters of the SLC38 gen…
197	ALCD1	alcohol dehydrogenase (methanol)	Miscellaneous		( 124.1 ) or ( 131.1 ) or ( 130.1 ) or ( 125.1 and 124.1 ) or ( 125.1 and 126.1 ) or ( 128.1 ) or ( 127.1 ) or ( 126.1 and 124.1 ) or ( 125.1 ) or ( 137872.1 ) or ( 284273.1 ) or ( 126.1 ) or ( 284273.2 )	-1000	1000	4	LOCUS:_130#TRANSCRIPT:1#ABBREVIATION:ADH6#ECNUMBERS:1.1.1.1#	Deng Y, Wang Z, Gu S, Ji C, Ying K, Xie Y, Mao Y#TITLE:Cloning and characterization of a novel human alcohol dehydrogenase gene (ADHFe1)#JOURNAL:DNA Seq#YEAR:2002#PUBMED:12592711#;Ramchandani VA, Bosron WF, Li TK#TITLE:Research advances in ethanol metabolism#JOURNAL:Pathol Biol (Paris)#YEAR:2001#PUBMED:11762128#;Salway, JG#TITLE:Metabolism at a Glance, 2nd ed#YEAR:1999#;Dawidek-Pietryka K, Szczep…
198	ALCD21_D	alcohol dehydrogenase (D-1,2-propanediol)	Pyruvate Metabolism		( 127.1 ) or ( 284273.2 ) or ( 125.1 ) or ( 128.1 ) or ( 131.1 ) or ( 125.1 and 124.1 ) or ( 124.1 ) or ( 130.1 ) or ( 137872.1 ) or ( 125.1 and 126.1 ) or ( 126.1 and 124.1 ) or ( 284273.1 ) or ( 126.1 )	0	1000	2	NCD	Ewaschuk JB, Naylor JM, Zello GA#TITLE:D-lactate in human and ruminant metabolism#JOURNAL:J Nutr#YEAR:2005#PUBMED:15987839#;Christopher MM, Eckfeldt JH, Eaton JW.#TITLE:Propylene glycol ingestion causes D-lactic acidosis#JOURNAL:Lab Invest.#YEAR:1990#PUBMED:2296157#
199	ALCD21_L	alcohol dehydrogenase (L-1,2-propanediol)	Pyruvate Metabolism		( 130.1 ) or ( 125.1 ) or ( 125.1 and 124.1 ) or ( 128.1 ) or ( 126.1 ) or ( 284273.2 ) or ( 137872.1 ) or ( 127.1 ) or ( 124.1 ) or ( 126.1 and 124.1 ) or ( 284273.1 ) or ( 125.1 and 126.1 ) or ( 131.1 )	0	1000	2	NCD	Ewaschuk JB, Naylor JM, Zello GA#TITLE:D-lactate in human and ruminant metabolism#JOURNAL:J Nutr#YEAR:2005#PUBMED:15987839#;Christopher MM, Eckfeldt JH, Eaton JW.#TITLE:Propylene glycol ingestion causes D-lactic acidosis#JOURNAL:Lab Invest.#YEAR:1990#PUBMED:2296157#
200	ALCD22_D	alcohol dehydrogenase (D-lactaldehyde)	Pyruvate Metabolism	1.1.1.78	( 126.1 ) or ( 137872.1 ) or ( 126.1 and 124.1 ) or ( 127.1 ) or ( 130.1 ) or ( 284273.1 ) or ( 125.1 and 124.1 ) or ( 128.1 ) or ( 124.1 ) or ( 125.1 ) or ( 284273.2 ) or ( 131.1 ) or ( 125.1 and 126.1 )	0	1000	2	NCD	Ewaschuk JB, Naylor JM, Zello GA#TITLE:D-lactate in human and ruminant metabolism#JOURNAL:J Nutr#YEAR:2005#PUBMED:15987839#;Christopher MM, Eckfeldt JH, Eaton JW.#TITLE:Propylene glycol ingestion causes D-lactic acidosis#JOURNAL:Lab Invest.#YEAR:1990#PUBMED:2296157#
201	ALCD22_L	alcohol dehydrogenase (L-lactaldehyde)	Pyruvate Metabolism	1.2.1.49	( 126.1 ) or ( 137872.1 ) or ( 126.1 and 124.1 ) or ( 127.1 ) or ( 130.1 ) or ( 284273.1 ) or ( 125.1 and 124.1 ) or ( 128.1 ) or ( 124.1 ) or ( 125.1 ) or ( 284273.2 ) or ( 131.1 ) or ( 125.1 and 126.1 )	0	1000	2	NCD	Ewaschuk JB, Naylor JM, Zello GA#TITLE:D-lactate in human and ruminant metabolism#JOURNAL:J Nutr#YEAR:2005#PUBMED:15987839#;Christopher MM, Eckfeldt JH, Eaton JW.#TITLE:Propylene glycol ingestion causes D-lactic acidosis#JOURNAL:Lab Invest.#YEAR:1990#PUBMED:2296157#
202	ALCD2if	alcohol dehydrogenase, forward rxn (ethanol -> acetaldehyde)	Glycolysis/Gluconeogenesis	1.1.1.1	( 125.1 and 126.1 ) or ( 137872.1 ) or ( 125.1 and 124.1 ) or ( 127.1 ) or ( 130.1 ) or ( 284273.1 ) or ( 126.1 ) or ( 124.1 ) or ( 128.1 ) or ( 125.1 ) or ( 126.1 ) or ( 284273.2 ) or ( 131.1 ) or ( 126.1 and 124.1 )	0	1000	0	NCD	Deng Y, Wang Z, Gu S, Ji C, Ying K, Xie Y, Mao Y#TITLE:Cloning and characterization of a novel human alcohol dehydrogenase gene (ADHFe1)#JOURNAL:DNA Seq#YEAR:2002#PUBMED:12592711#;Ramchandani VA, Bosron WF, Li TK#TITLE:Research advances in ethanol metabolism#JOURNAL:Pathol Biol (Paris)#YEAR:2001#PUBMED:11762128#
203	ALDD19x	aldehyde dehydrogenase (phenylacetaldehyde, NAD)	Phenylalanine metabolism	1.2.1.39	( 222.1 ) or ( 218.1 ) or ( 221.1 ) or ( 220.1 )	0	1000	2	JLR	Jeremy M. Berg, John L. Tymoczko, Lubert Stryer, Neil D. Clarke#TITLE:Biochemistry#YEAR:2002#
204	ALDD19x(P)	aldehyde dehydrogenase (phenylacetaldehyde, NADP)	Phenylalanine metabolism	1.2.1.39	( 222.1 ) or ( 218.1 ) or ( 221.1 ) or ( 220.1 )	0	1000	2	JLR SAB
205	ALDD2x	aldehyde dehydrogenase (acetaldehyde, NAD)	Glycolysis/Gluconeogenesis	1.2.1.3	( 218.1 ) or ( 501.1 ) or ( 8854.2 ) or ( 224.1 ) or ( 222.1 ) or ( 8854.1 ) or ( 221.1 ) or ( 216.1 ) or ( 8854.3 ) or ( 223.1 ) or ( 220.1 )	0	1000	0	Only acetaldehyde considered for now. See also 1.2.1.4. Wide specificity, including oxidation of D-glucuronolactone to D-glucarate. Formerly EC 1.1.1.70	Sladek NE#TITLE:Human aldehyde dehydrogenases: potential pathological, pharmacological, and toxicological impact#JOURNAL:J Biochem Mol Toxicol#YEAR:2003#PUBMED:12616643#
206	ALDD2xm	aldehyde dehydrogenase (acetylaldehyde, NAD), mitochondrial	Glycolysis/Gluconeogenesis	1.2.1.3	( 219.1 ) or ( 217.1 )	0	0	0	NCD
207	ALDD2y	aldehyde dehydrogenase (acetaldehyde, NADP)	Glycolysis/Gluconeogenesis	1.2.1.4	( 223.1 ) or ( 221.1 ) or ( 218.1 ) or ( 8854.1 ) or ( 8854.3 ) or ( 222.1 ) or ( 8854.2 ) or ( 224.1 )	0	1000	0	See also ALDH1 (1.2.1.3)	Sladek NE#TITLE:Human aldehyde dehydrogenases: potential pathological, pharmacological, and toxicological impact#JOURNAL:J Biochem Mol Toxicol#YEAR:2003#PUBMED:12616643#
208	ALOX5	Arachidonate 5-lipoxygenase	Eicosanoid Metabolism	1.13.11.34	( 240.1 )	0	1000	4	cofactors + usage still not clear see version ALOX5b for ATP concomittant hydrolysis - literature notes in vitro requirement for Ca and ATP for activity in addition to Fe	Voet D, Voet JG#TITLE:Biochemistry#YEAR:1995#;Matsumoto T, Funk CD, Radmark O, Hoog JO, Jornvall H, Samuelsson B.#TITLE:Molecular cloning and amino acid sequence of human 5-lipoxygenase.#JOURNAL:Proc Natl Acad Sci#YEAR:1988#PUBMED:2829172#
209	ALOX52	Arachidonate 5-lipoxygenase	Eicosanoid Metabolism		( 240.1 )	0	1000	4	cofactors + usage still not clear unknown mechanism - biochemistry supported by PMID: 2829172, 11160764	Leff AR.#TITLE:Regulation of leukotrienes in the management of asthma: biology and clinical therapy.#JOURNAL:Annu Rev Med#YEAR:2001#PUBMED:11160764#
210	ALR3	aldose reductase (acetol)	Pyruvate Metabolism		( 10327.2 ) or ( 8574.1 ) or ( 10327.1 ) or ( 231.1 )	0	1000	4	NCD	Vander Jagt DL, Robinson B, Taylor KK, Hunsaker LA.#TITLE:Reduction of trioses by NADPH-dependent aldo-keto reductases. Aldose reductase, methylglyoxal, and diabetic complications#JOURNAL:J Biol Chem#YEAR:1992#PUBMED:1537826#;Kelly VP, Sherratt PJ, Crouch DH, Hayes JD#TITLE:Novel homodimeric and heterodimeric rat gamma-hydroxybutyrate synthases that associate with the Golgi apparatus define a dis…
211	AMACR2p	alpha-methylacyl-CoA racemase (reductase)	Bile Acid Biosynthesis	5.1.99.4	( 23600.1 ) or ( 23600.2 )	0	1000	2	should be analogous to AMACRp as per KEGG - in this case: reductase not a racemase NJ	Russell DW#TITLE:The enzymes, regulation, and genetics of bile acid synthesis#JOURNAL:Annu Rev Biochem#YEAR:2003#
212	AMACRp	alpha-methylacyl-CoA racemase	Bile Acid Biosynthesis	5.1.99.4	( 23600.2 ) or ( 23600.1 )	0	1000	4	see Russell bile acid biosynthesis review uniprot NJ	Russell DW#TITLE:The enzymes, regulation, and genetics of bile acid synthesis#JOURNAL:Annu Rev Biochem#YEAR:2003#;VanVeldhoven PP, Croes K, Casteels M, Mannaerts GP#TITLE:_2-methylacyl racemase: a couple assay based on the use of pristanoyl-CoA oxidase/peroxidase and reinvestigation of its subcellular distribution in rat and human liver#JOURNAL:Biochimica et Biophysica Acta#YEAR:1997#
213	AMANK	N-acetyl-D-mannosamine kinase	Aminosugar Metabolism	2.7.1.60	( 10020.1 ) or ( 55577.1 )	0	1000	4	JLR - Kegg R02705	Varki, Cummings, Esko, Freeze, Hart, Marth#TITLE:Essentials of Glycobiology#YEAR:1999#;Devlin, TM#TITLE:Textbook of Biochemistry with Clinical Correlations#YEAR:2001#;Seppala R, Lehto VP, Gahl WA#TITLE:Mutations in the human UDP-N-acetylglucosamine 2-epimerase gene define the disease sialuria and the allosteric site of the enzyme#JOURNAL:Am J Hum Genet#YEAR:1999#PUBMED:10330343#;Lucka L, Krause M…
214	AMETt2m	S-Adenosyl-L-methionine reversible transport, mitochondrial	Transport, Mitochondrial		( 115286.3 ) or ( 115286.2 ) or ( 115286.1 )	-1000	1000	4	Added by RS/TV (6/17/05)	Agrimi G, Di Noia MA, Marobbio CM, Fiermonte G, Lasorsa FM, Palmieri F#TITLE:Identification of the human mitochondrial S-adenosylmethionine transporter: bacterial expression, reconstitution, functional characterization and tissue distribution#JOURNAL:Biochem J#YEAR:2004#PUBMED:14674884#
215	AMPDA	Adenosine monophosphate deaminase	Nucleotides		( 271.2 ) or ( 270.1 ) or ( 271.1 ) or ( 272.1 ) or ( 271.3 )	0	1000	4	LOCUS:_272#TRANSCRIPT:1#ABBREVIATION:AMPD3#ECNUMBERS:3.5.4.6#	Mahnke-Zizelman DK, Sabina RL.#TITLE:Cloning of human AMP deaminase isoform E cDNAs. Evidence for a third AMPD gene exhibiting alternatively spliced 5&apos;-exons. #JOURNAL:J Biol Chem. #YEAR:1992#PUBMED:1400401#;Sabina RL, Morisaki T, Clarke P, Eddy R, Shows TB, Morton CC, Holmes EW. #TITLE:Characterization of the human and rat myoadenylate deaminase genes. #JOURNAL:J Biol Chem.#YEAR:1990#PUBMED…
216	AMPTASECG	alanyl aminopeptidase (cys-gly)	Glutathione Metabolism	3.4.11.2	( 290.1 )	0	1000	1	SAB	Metzler, David E #TITLE:Biochemistry : the chemical reactions of living cells 2 ed vol 1#YEAR:2001#
217	AMPTASECGe	alanyl aminopeptidase (cys-gly) (e)	Glutathione Metabolism	3.4.11.2	( 290.1 )	0	1000	4	SAB	Metzler, David E #TITLE:Biochemistry : the chemical reactions of living cells 2 ed vol 1#YEAR:2001#
218	AMY1e	alpha-amylase, extracellular (strch1 -> strch2)	Starch and Sucrose Metabolism	3.2.1.1	( 6520.1 ) or ( 280.1 ) or ( 278.1 ) or ( 276.1 ) or ( 277.1 ) or ( 6519.1 and 11136.1 ) or ( 276.2 ) or ( 279.1 )	0	1000	0	NCD
219	AMY2e	alpha-amylase, extracellular (glygn2 -> glygn4)	Starch and Sucrose Metabolism	3.2.1.1	( 6520.1 ) or ( 280.1 ) or ( 278.1 ) or ( 276.1 ) or ( 277.1 ) or ( 6519.1 and 11136.1 ) or ( 276.2 ) or ( 279.1 )	0	1000	0	NCD
220	ANDRSTRNGLCte	glucuronidated compound transport	Transport, Extracellular		( 4363.1 )	0	1000	2	for MDR transport mechanism NJ
221	ANDRSTRNte	androsterone transport	Transport, Extracellular			-1000	1000	1	specific mechanism not known, proton dependence for trans-mit transport has been suggested, however directionality and stoichiometry has not yet been elucidated. see PMID: 12770731 and others NJ
222	ANDRSTRNtr	androsterone intracellular transport	Transport, Endoplasmic Reticular			-1000	1000	2	specific mechanism not known, proton dependence for trans-mit transport has been suggested, however directionality and stoichiometry has not yet been elucidated. see PMID: 12770731 and others NJ
223	AOBUTDsm	L-2-amino-3-oxobutanoate decarboxylation, mitochondrial (spontaneous)	Glycine, Serine, and Threonine Metabolism			0	1000	2	Spontaneous reaction	Edgar AJ. #TITLE:Molecular cloning and tissue distribution of mammalian L-threonine 3-dehydrogenases.#YEAR:2002#PUBMED:12097150#
224	APAT2rm	3-Aminopropanoate:2-oxoglutarate aminotransferase (m)	beta-Alanine metabolism	2.6.1.19	( 18.1 ) or ( 18.2 )	-1000	1000	1	SAB	Ohyama T, Matsuda K, Tachibana H, Fujimoto Sakata S, Mori M, Horiuchi M, Tamaki N#TITLE:Purification and expression of a processing protease on beta-alanine-oxoglutarate aminotransferase from rat liver mitochondria#JOURNAL:FEBS Lett#YEAR:2004#PUBMED:15304357#
225	ARACHCOAtx	fatty acid intracellular transport	Transport, Peroxisomal			-1000	1000	2	interaction between peroxisomes and ER (some enzymes on the outer membrane) NJ
226	ARACHCPT1	carnitine transferase	Carnitine shuttle	2.3.1.21	( 1375.3 ) or ( 1374.1 ) or ( 1375.2 ) or ( 1375.4 ) or ( 1375.1 ) or ( 126129.1 )	0	1000	4	NJ
227	ARACHCPT2	carnitine transferase	Carnitine shuttle		( 1376.1 )	0	1000	4	NJ
228	ARACHCRNt	transport into the mitochondria (carnitine)	Carnitine shuttle		( 788.1 )	0	1000	4	NJ
229	ARACHDCOAtx	fatty acid intracellular transport	Transport, Peroxisomal			-1000	1000	2	interaction between peroxisomes and ER (some enzymes on the outer membrane) NJ
230	ARACHDtr	intracellular transport	Transport, Endoplasmic Reticular			-1000	1000	1	unknown mechanism, presumed diffusion NJ
231	ARGDCm	arginine decarboxylase (m)	Arginine and Proline Metabolism	4.1.1.19	( 113451.1 )	0	1000	4	SAB m	Zhu MY, Iyo A, Piletz JE, Regunathan S#TITLE:Expression of human arginine decarboxylase, the biosynthetic enzyme for agmatine#JOURNAL:Biochim Biophys Acta#YEAR:2004#;Grillo MA, Colombatto S#TITLE:Metabolism and function in animal tissues of agmatine, a biogenic amine formed from arginine#JOURNAL:Amino Acids#YEAR:2004#PUBMED:14752610#
232	ARGN	arginase	Urea cycle/amino group metabolism	3.5.3.1	( 383.1 )	0	1000	4	LOCUS:_383#TRANSCRIPT:1#ABBREVIATION:ARG1#ECNUMBERS:3.5.3.1#	Voet D, Voet JG#TITLE:Biochemistry#YEAR:1995#
233	ARGSL	argininosuccinate lyase	Alanine and Aspartate Metabolism	4.3.2.1	( 435.1 )	-1000	1000	4	LOCUS:_435#TRANSCRIPT:1#ABBREVIATION:ASL#ECNUMBERS:4.3.2.1#	O&apos;Brien WE, McInnes R, Kalumuck K, Adcock M.#TITLE:Cloning and sequence analysis of cDNA for human argininosuccinate lyase.#JOURNAL:Proc Natl Acad Sci U S A#YEAR:1986#PUBMED:3463959#;Kleijer WJ et al.#TITLE:Clinical, enzymatic, and molecular genetic characterization of a biochemical variant type of argininosuccinic aciduria: prenatal and postnatal diagnosis in five unrelated families.#YEAR:2…
234	ARGSS	argininosuccinate synthase	Alanine and Aspartate Metabolism	6.3.4.5	( 445.1 ) or ( 445.2 )	0	1000	4	LOCUS:_445#TRANSCRIPT:1#ABBREVIATION:ASS#ECNUMBERS:6.3.4.5#	Metzler, David E#TITLE:Biochemistry : the chemical reactions of living cells 2 ed vol 2#YEAR:2001#
235	ARGtiDF	L-arginine transport via diffusion (extracellular to cytosol)	Transport, Extracellular		( 6541.1 ) or ( 6542.1 ) or ( 55089.1 ) or ( 84889.1 )	-0.31855	-0.26063	4	SAB	Gu S, Adan-Rice D, Leach RJ, Jiang JX#TITLE:A novel human amino acid transporter, hNAT3: cDNA cloning, chromosomal mapping, genomic structure, expression, and functional characterization#JOURNAL:Genomics#YEAR:2001#PUBMED:11414754#;Hatanaka T, Huang W, Ling R, Prasad PD, Sugawara M, Leibach FH, Ganapathy V#TITLE:Evidence for the transport of neutral as well as cationic amino acids by ATA3, a novel…
236	ARGtm	arginine mitochondrial transport via ornithine carrier	Transport, Mitochondrial		( 83884.1 ) or ( 10166.1 )	-1000	1000	4	TDV	Palmieri, F.#TITLE: The mitochondrial transporter family (SLC25): physiological and pathological implications.#JOURNAL: Pflugers Archive#YEAR:2004#PUBMED:14598172#
237	ARSA	Arylsulfatase A	Sphingolipid Metabolism	3.1.6.8	( 410.1 )	0	1000	4	NJ	Stein C, Gieselmann V, Kreysing J, Schmidt B, Pohlmann R, Waheed A, Meyer HE, O&apos;Brien JS, von Figura K.#TITLE:Cloning and expression of human arylsulfatase A.#JOURNAL:J Biol Chem#YEAR:1989#PUBMED:2562955#
238	ARTFR13	R group artificial flux	R Group Synthesis			0	1000	0	Carbon stoichiometry normalized wrt C16:0 The concomitant oxidation of fadh2 is to account for the normalization to a saturated fatty acid (later in the mitochondria, the full beta oxidation cycle will occur, and the additional round of fad reduction will be balanced to account for the respective degree of desaturation). For example a 9,15 fatty acid would have 2fadh2(m) -&gt; 2fad(m). The concom…
239	ARTFR202	R group artificial flux (C18:3, n-3)	R Group Synthesis			0	1000	0	Carbon stoichiometry normalized wrt C16:0 The concomitant oxidation of fadh2 is to account for the normalization to a saturated fatty acid (later in the mitochondria, the full beta oxidation cycle will occur, and the additional round of fad reduction will be balanced to account for the respective degree of desaturation). For example a 9,15 fatty acid would have 2fadh2(m) -&gt; 2fad(m). The concom…
240	ARTFR31	R group artificial flux	R Group Synthesis			0	1000	0	Carbon stoichiometry normalized wrt C16:0 The concomitant oxidation of fadh2 is to account for the normalization to a saturated fatty acid (later in the mitochondria, the full beta oxidation cycle will occur, and the additional round of fad reduction will be balanced to account for the respective degree of desaturation). For example a 9,15 fatty acid would have 2fadh2(m) -&gt; 2fad(m). The concom…
241	ARTFR42	R group artificial flux	R Group Synthesis			0	0	0	Carbon stoichiometry normalized wrt C16:0 The concomitant oxidation of fadh2 is to account for the normalization to a saturated fatty acid (later in the mitochondria, the full beta oxidation cycle will occur, and the additional round of fad reduction will be balanced to account for the respective degree of desaturation). For example a 9,15 fatty acid would have 2fadh2(m) -&gt; 2fad(m). The concom…
242	ARTFR44	R group artificial flux	R Group Synthesis			0	0	0	Carbon stoichiometry normalized wrt C16:0 The concomitant oxidation of fadh2 is to account for the normalization to a saturated fatty acid (later in the mitochondria, the full beta oxidation cycle will occur, and the additional round of fad reduction will be balanced to account for the respective degree of desaturation). For example a 9,15 fatty acid would have 2fadh2(m) -&gt; 2fad(m). The concom…
243	ARTFR46	R group artificial flux	R Group Synthesis			0	0	0	Carbon stoichiometry normalized wrt C16:0 The concomitant oxidation of fadh2 is to account for the normalization to a saturated fatty acid (later in the mitochondria, the full beta oxidation cycle will occur, and the additional round of fad reduction will be balanced to account for the respective degree of desaturation). For example a 9,15 fatty acid would have 2fadh2(m) -&gt; 2fad(m). The concom…
244	ARTPLM1m	R group to palmitate conversion	R Group Synthesis			-1000	1000	0	cytosolic conversion of pooled FA into palmitate (so subsequent transport into mit w/ FA oxidation can occur). Since Carbon stoichiometry normalized wrt C16 ratio between Rgroupcoa and pmtcoa is 1:1 HR fatty acid metabolism - R groups = acyl groups, Rtotal, Rtotal2, Rtotal3 correspond to three possible acyl groups added to glycerol R1 - C16 groups R2 - essential FA + associated derivatives R3 - n…
245	ARTPLM2m	R group to palmitate conversion	R Group Synthesis			-1000	1000	0	cytosolic conversion of pooled FA into palmitate (so subsequent transport into mit w/ FA oxidation can occur). Since Carbon stoichiometry normalized wrt C16 ratio between Rgroupcoa and pmtcoa is 1:1 HR fatty acid metabolism - R groups = acyl groups, Rtotal, Rtotal2, Rtotal3 correspond to three possible acyl groups added to glycerol R1 - C16 groups R2 - essential FA + associated derivatives R3 - n…
246	ARTPLM3m	R group to palmitate conversion	R Group Synthesis			-1000	1000	0	cytosolic conversion of pooled FA into palmitate (so subsequent transport into mit w/ FA oxidation can occur). Since Carbon stoichiometry normalized wrt C16 ratio between Rgroupcoa and pmtcoa is 1:1 HR fatty acid metabolism - R groups = acyl groups, Rtotal, Rtotal2, Rtotal3 correspond to three possible acyl groups added to glycerol R1 - C16 groups R2 - essential FA + associated derivatives R3 - n…
247	ASAH1	N-acylsphingosine amidohydrolase	Sphingolipid Metabolism	3.5.1.23	( 427.1 ) or ( 427.2 )	0	1000	4	NJ	Koch J, Gartner S, Li CM, Quintern LE, Bernardo K, Levran O, Schnabel D, Desnick RJ, Schuchman EH, Sandhoff K.#TITLE:Molecular cloning and characterization of a full-length complementary DNA encoding human acid ceramidase. Identification Of the first molecular lesion causing Farber disease.#JOURNAL:J Biol Chem#YEAR:1996#PUBMED:8955159#
248	ASCBt4	L-ascorbate transport via proton symport	Transport, Extracellular		( 9962.2 ) or ( 9963.1 ) or ( 9962.1 ) or ( 9963.2 )	-1000	1000	4	NCD	Ball, G.F.M#TITLE:Vitamins: Their Role in the Human Body#YEAR:2004#;Daruwala R, Song J, Koh WS, Rumsey SC, Levine M#TITLE:Cloning and functional characterization of the human sodium-dependent vitamin C transporters hSVCT1 and hSVCT2#JOURNAL:FEBS Lett#YEAR:1999#PUBMED:10556521#;Wang Y, Mackenzie B, Tsukaguchi H, Weremowicz S, Morton CC, Hediger MA#TITLE:Human vitamin C (L-ascorbic acid) transporte…
249	ASNS1	asparagine synthase (glutamine-hydrolysing)	Alanine and Aspartate Metabolism	6.3.5.4	( 440.1 ) or ( 440.3 ) or ( 440.2 )	0	1000	4	LOCUS:_440#TRANSCRIPT:1#ABBREVIATION:ASNS#ECNUMBERS:6.3.5.4#	Van Heeke G, Schuster SM.#TITLE:Expression of human asparagine synthetase in Escherichia coli.#YEAR:1989#PUBMED:2564390#;Andrulis IL, Chen J, Ray PN.#TITLE:Isolation of human cDNAs for asparagine synthetase and expression in Jensen rat sarcoma cells. #YEAR:1987#PUBMED:2886907#
250	ASNtN1	Asparagine transport (Na, H coupled)	Transport, Extracellular		( 92745.1 ) or ( 10991.1 )	-1000	1000	4	SAB based om PMID 10823827	Fei YJ, Sugawara M, Nakanishi T, Huang W, Wang H, Prasad PD, Leibach FH, Ganapathy V#TITLE:Primary structure, genomic organization, and functional and electrogenic characteristics of human system N 1, a Na+- and H+-coupled glutamine transporter#JOURNAL:J Biol Chem#YEAR:2000#PUBMED:10823827#;Mackenzie B, Erickson JD#TITLE:Sodium-coupled neutral amino acid (System N/A) transporters of the SLC38 gen…
251	ASP1DC	aspartate 1-decarboxylase	beta-Alanine metabolism	4.1.1.11	( 2571.1 ) or ( 2571.2 )	0	1000	1	The E. coli enzyme contains a pyruvoyl group.
252	ASPCTr	aspartate carbamoyltransferase (reversible)	Pyrimidine Biosynthesis	2.1.3.2	( 790.1 )	0	0	4	LOCUS:_790#TRANSCRIPT:1#ABBREVIATION:CAD1#ECNUMBERS:6.3.5.5,2.1.3.2,3.5.2.3#	Iwahana H, Fujimura M, Ii S, Kondo M, Moritani M, Takahashi Y, Yamaoka T, Yoshimoto K, Itakura M.#TITLE:Molecular cloning of a human cDNA encoding a trifunctional enzyme of carbamoyl-phosphate synthetase-aspartate transcarbamoylase-dihydroorotase in de Novo pyrimidine synthesis. #JOURNAL:Biochem Biophys Res Commun.#YEAR:1996#PUBMED:8619816#;Chen KC, Vannais DB, Jones C, Patterson D, Davidson JN.#…
253	ASPGLUm	aspartate-glutamate mitochondrial shuttle	Transport, Mitochondrial		( 8604.1 ) or ( 10165.1 )	-1000	1000	4	TDV	Palmieri, F.#TITLE: The mitochondrial transporter family (SLC25): physiological and pathological implications.#JOURNAL: Pflugers Archive#YEAR:2004#PUBMED:14598172#
254	ASPNATm	aspartate N-acetyltransferase, mitochondrial	Alanine and Aspartate Metabolism	2.3.1.17		0	1000	4	MM	Moreno A, Ross BD, Bluml S.#TITLE:Direct determination of the N-acetyl-L-aspartate synthesis rate in the human brain by (13)C MRS and [1-(13)C]glucose infusion.#YEAR:2001#PUBMED:11279290#
255	ASPTAm	aspartate transaminase	Alanine and Aspartate Metabolism	2.6.1.1	( 2806.1 )	500	1000	4	NCD	Ford GC, Eichele G, Jansonius JN.#TITLE:Three-dimensional structure of a pyridoxal-phosphate-dependent enzyme, mitochondrial aspartate aminotransferase.#JOURNAL:Proc Natl Acad Sci U S A.#YEAR:1980#PUBMED:6930651#
256	ASPt6	L-aspartate transport via Na, H symport and K antiport	Transport, Extracellular		( 6511.1 ) or ( 6505.1 ) or ( 6507.1 ) or ( 6506.1 ) or ( 6512.1 )	0	1000	4	SAB see Kanai and Hediger 2003	Kanai Y, Hediger MA#TITLE:The glutamate/neutral amino acid transporter family SLC1: molecular, physiological and pharmacological aspects#JOURNAL:Pflugers Arch#YEAR:2004#PUBMED:14530974#
257	ATP1ter	ADP/ATP transporter, endoplasmic reticulum	Transport, Endoplasmic Reticular			-1000	1000	2	NCD	Varki, Cummings, Esko, Freeze, Hart, Marth#TITLE:Essentials of Glycobiology#YEAR:1999#
258	ATP2ter	AMP/ATP transporter, endoplasmic reticulum	Transport, Endoplasmic Reticular			-1000	1000	2	NCD	Varki, Cummings, Esko, Freeze, Hart, Marth#TITLE:Essentials of Glycobiology#YEAR:1999#
259	ATPH1e	ATP diphosphohydrolase	Nucleotides	3.6.1.5	( 954.1 ) or ( 954.2 ) or ( 953.1 ) or ( 956.1 ) or ( 955.1 ) or ( 957.1 )	0	1000	4	IT	Kaczmarek E, Koziak K, Sevigny J, Siegel JB, Anrather J, Beaudoin AR, Bach FH, Robson SC.#TITLE:Identification and characterization of CD39/vascular ATP diphosphohydrolase.#JOURNAL:J Biol Chem.#YEAR:1996#PUBMED:8955160#;Chadwick BP, Frischauf AM.#TITLE:The CD39-like gene family: identification of three new human members (CD39L2, CD39L3, and CD39L4), their murine homologues, and a member of the ge…
260	ATPH2e	ATP diphosphohydrolase	Nucleotides	3.6.1.5	( 954.2 ) or ( 954.1 ) or ( 953.1 ) or ( 956.1 ) or ( 955.1 ) or ( 957.1 )	0	1000	4	IT	Kaczmarek E, Koziak K, Sevigny J, Siegel JB, Anrather J, Beaudoin AR, Bach FH, Robson SC.#TITLE:Identification and characterization of CD39/vascular ATP diphosphohydrolase.#JOURNAL:J Biol Chem.#YEAR:1996#PUBMED:8955160#;Chadwick BP, Frischauf AM.#TITLE:The CD39-like gene family: identification of three new human members (CD39L2, CD39L3, and CD39L4), their murine homologues, and a member of the ge…
261	ATPS4m	ATP synthase (four protons for one ATP)	Oxidative Phosphorylation	3.6.3.14	( 513.1 and 498.2 and 506.1 and 509.2 and 514.1 or 498.2 and 513.2 and 514.2 and 506.1 and 509.2 or 513.1 and 509.1 and 498.1 and 514.2 and 506.1 or 498.2 and 513.2 and 506.1 and 509.2 and 514.1 or 513.2 and 498.1 and 514.2 and 506.1 and 509.2 or 513.1 and 498.1 and 506.1 and 509.2 and 514.1 or 513.1 and 498.2 and 514.2 and 506.1 and 509.2 or 513.1 and 498.2 and 509.1 and 506.1 and 514.1 or 498.2…	0	1000	4	IF TV
262	ATPasel	V-type ATPase, H+ transporting, lysosomal	Transport, Lysosomal	3.6.3.14	( 50617.1 and 533.1 and 527.1 and 8992.1 and 245972.1 or 50617.1 and 533.1 and 527.1 and 8992.1 and 9114.1 or 533.1 and 527.1 and 8992.1 and 535.1 and 245972.1 or 533.1 and 527.1 and 8992.1 and 535.1 and 9114.1 or 533.1 and 527.1 and 8992.1 and 50617.3 and 245972.1 or 533.1 and 527.1 and 8992.1 and 10312.1 and 9114.1 or 533.1 and 527.1 and 8992.1 and 245972.1 and 50617.2 or 533.1 and 527.1 and 89…	0	1000	4	RS/DK	Eskelinen EL, Tanaka Y, Saftig P.#TITLE:At the acidic edge: emerging functions for lysosomal membrane proteins#JOURNAL:Trends Cell Biol#YEAR:2003#PUBMED:12628346#;Forgac M.#TITLE:Structure and properties of the vacuolar (H+)-ATPases#JOURNAL:J Biol Chem#YEAR:1999#PUBMED:10224039#
263	ATPtm	ADP/ATP transporter, mitochondrial	Transport, Mitochondrial		( 291.1 ) or ( 293.1 ) or ( 292.1 )	0	1000	4	NCD	Palmieri, F.#TITLE: The mitochondrial transporter family (SLC25): physiological and pathological implications.#JOURNAL: Pflugers Archive#YEAR:2004#PUBMED:14598172#
264	ATPtx	ATP transporter, peroxisomal	Transport, Peroxisomal			-1000	1000	1	most likely NOT physiological - detailed information about the peroxisomal transporters has not yet been achieved - this transport is most likely dependent on a concomitant energy consuming reaction (human ABC peroxisomal transporters: PEX family - check in future for new research articles describing biochemistry and stoichiometry) NJ
265	A_MANASEly	alpha-mannosidase, lysosomal	N-Glycan Degradation	3.2.1.24	( 4125.1 )	0	1000	0	NCD	Liao YF, Lal A, Moremen KW.#TITLE:Cloning, expression, purification, and characterization of the human broad specificity lysosomal acid alpha-mannosidase#JOURNAL:J Biol Chem#YEAR:1996#PUBMED:8910458#
266	B3GALT3g	Beta-1,3-galactosyltransferase 3	Sphingolipid Metabolism	2.4.1.79	( 8706.4 ) or ( 8706.1 ) or ( 8706.3 ) or ( 8706.2 )	0	1000	4	NJ	Kolter T, Sandhoff K#TITLE:Recent advances in the biochemistry of sphingolipidoses#JOURNAL:Brain Pathology#YEAR:1998#;Amado M, Almeida R, Carneiro F, Levery ST, Holmes EH, Nomoto M, Hollingsworth MA, Hassan H, Schwientek T, Nielsen PA, Bennett EP, Clausen H#TITLE:A family of human beta3-galactosyltransferases#JOURNAL:The Journal of Biological Chemistry#YEAR:1998#
267	B3GALT41g	Beta-1,3-galactosyltransferase 4	Sphingolipid Metabolism	2.4.1.62	( 8705.1 )	0	1000	4	NJ	Kolter T, Sandhoff K#TITLE:Recent advances in the biochemistry of sphingolipidoses#JOURNAL:Brain Pathology#YEAR:1998#;Amado M, Almeida R, Carneiro F, Levery ST, Holmes EH, Nomoto M, Hollingsworth MA, Hassan H, Schwientek T, Nielsen PA, Bennett EP, Clausen H#TITLE:A family of human beta3-galactosyltransferases#JOURNAL:The Journal of Biological Chemistry#YEAR:1998#
268	B3GALT42g	Beta-1,3-galactosyltransferase 4	Sphingolipid Metabolism	2.4.1.62	( 8705.1 )	0	1000	4	NJ	Kolter T, Sandhoff K#TITLE:Recent advances in the biochemistry of sphingolipidoses#JOURNAL:Brain Pathology#YEAR:1998#;Amado M, Almeida R, Carneiro F, Levery ST, Holmes EH, Nomoto M, Hollingsworth MA, Hassan H, Schwientek T, Nielsen PA, Bennett EP, Clausen H#TITLE:A family of human beta3-galactosyltransferases#JOURNAL:The Journal of Biological Chemistry#YEAR:1998#
269	B3GALT43g	Beta-1,3-galactosyltransferase 4	Sphingolipid Metabolism	2.4.1.62	( 8705.1 )	0	1000	4	NJ	Kolter T, Sandhoff K#TITLE:Recent advances in the biochemistry of sphingolipidoses#JOURNAL:Brain Pathology#YEAR:1998#;Amado M, Almeida R, Carneiro F, Levery ST, Holmes EH, Nomoto M, Hollingsworth MA, Hassan H, Schwientek T, Nielsen PA, Bennett EP, Clausen H#TITLE:A family of human beta3-galactosyltransferases#JOURNAL:The Journal of Biological Chemistry#YEAR:1998#
270	B3GALT44g	Beta-1,3-galactosyltransferase 4	Sphingolipid Metabolism	2.4.1.62	( 8705.1 )	0	1000	4	NJ	Kolter T, Sandhoff K#TITLE:Recent advances in the biochemistry of sphingolipidoses#JOURNAL:Brain Pathology#YEAR:1998#;Amado M, Almeida R, Carneiro F, Levery ST, Holmes EH, Nomoto M, Hollingsworth MA, Hassan H, Schwientek T, Nielsen PA, Bennett EP, Clausen H#TITLE:A family of human beta3-galactosyltransferases#JOURNAL:The Journal of Biological Chemistry#YEAR:1998#
271	B3GALT5g	Beta-1,3-galactosyltransferase 5	Sphingolipid Metabolism		( 10317.4 ) or ( 10317.1 ) or ( 10317.3 ) or ( 10317.2 ) or ( 10317.5 )	0	1000	4	NJ	Kolter T, Sandhoff K#TITLE:Recent advances in the biochemistry of sphingolipidoses#JOURNAL:Brain Pathology#YEAR:1998#;Amado M, Almeida R, Carneiro F, Levery ST, Holmes EH, Nomoto M, Hollingsworth MA, Hassan H, Schwientek T, Nielsen PA, Bennett EP, Clausen H#TITLE:A family of human beta3-galactosyltransferases#JOURNAL:The Journal of Biological Chemistry#YEAR:1998#
272	B3GNT11g	UDP-GlcNAc:betaGal beta-1,3-N-acetylglucosaminyltransferase 1	Blood Group Biosynthesis		( 10678.1 )	0	1000	4	NJ	Isshiki S, Kudo T, Nishihara S, Ikehara Y, Togayachi A, Furuya A, Shitara K, Kubota T, Watanabe M, Kitajima M, Narimatsu H.#TITLE:Lewis type 1 antigen synthase (beta3Gal-T5) is transcriptionally regulated by homeoproteins.#YEAR:2003#PUBMED:12855703#
273	B3GNT310g	UDP-GlcNAc:betaGal beta-1,3-N-acetylglucosaminyltransferase 3, Golgi apparatus	Blood Group Biosynthesis		( 10331.1 )	0	1000	2	NJ	Yokoyama-Kobayashi M, Yamaguchi T, Sekine S, Kato S.#TITLE:Selection of cDNAs encoding putative type II membrane proteins on the cell surface from a human full-length cDNA bank.#JOURNAL:Gene#YEAR:1999#PUBMED:10072769#
274	B3GNT312g	UDP-GlcNAc:betaGal beta-1,3-N-acetylglucosaminyltransferase 3, Golgi apparatus	Blood Group Biosynthesis		( 10331.1 )	0	1000	2	NJ	Yokoyama-Kobayashi M, Yamaguchi T, Sekine S, Kato S.#TITLE:Selection of cDNAs encoding putative type II membrane proteins on the cell surface from a human full-length cDNA bank.#JOURNAL:Gene#YEAR:1999#PUBMED:10072769#
275	B3GNT31g	UDP-GlcNAc:betaGal beta-1,3-N-acetylglucosaminyltransferase 3, Golgi apparatus	Sphingolipid Metabolism		( 10331.1 )	0	1000	4	NJ	Kolter T, Sandhoff K#TITLE:Recent advances in the biochemistry of sphingolipidoses#JOURNAL:Brain Pathology#YEAR:1998#;Zhou D, Dinter A, Gutierrez Gallego R, Kamerling JP, Vliegenthart JF, Berger EG, Hennet T. #TITLE:A beta-1,3-N-acetylglucosaminyltransferase with poly-N-acetyllactosamine synthase activity is structurally related to beta-1,3-galactosyltransferases. #JOURNAL:Proc Natl Acad Sci#YEAR…
276	B3GNT32g	UDP-GlcNAc:betaGal beta-1,3-N-acetylglucosaminyltransferase 3, Golgi apparatus	Sphingolipid Metabolism		( 10331.1 )	0	1000	4	NJ	Kolter T, Sandhoff K#TITLE:Recent advances in the biochemistry of sphingolipidoses#JOURNAL:Brain Pathology#YEAR:1998#;Zhou D, Dinter A, Gutierrez Gallego R, Kamerling JP, Vliegenthart JF, Berger EG, Hennet T. #TITLE:A beta-1,3-N-acetylglucosaminyltransferase with poly-N-acetyllactosamine synthase activity is structurally related to beta-1,3-galactosyltransferases. #JOURNAL:Proc Natl Acad Sci#YEAR…
277	B3GNT33g	UDP-GlcNAc:betaGal beta-1,3-N-acetylglucosaminyltransferase 3, Golgi apparatus	Sphingolipid Metabolism		( 10331.1 )	0	1000	4	NJ	Kolter T, Sandhoff K#TITLE:Recent advances in the biochemistry of sphingolipidoses#JOURNAL:Brain Pathology#YEAR:1998#;Zhou D, Dinter A, Gutierrez Gallego R, Kamerling JP, Vliegenthart JF, Berger EG, Hennet T. #TITLE:A beta-1,3-N-acetylglucosaminyltransferase with poly-N-acetyllactosamine synthase activity is structurally related to beta-1,3-galactosyltransferases. #JOURNAL:Proc Natl Acad Sci#YEAR…
278	B3GNT34g	UDP-GlcNAc:betaGal beta-1,3-N-acetylglucosaminyltransferase 3, Golgi apparatus	Sphingolipid Metabolism		( 10331.1 )	0	1000	4	NJ	Kolter T, Sandhoff K#TITLE:Recent advances in the biochemistry of sphingolipidoses#JOURNAL:Brain Pathology#YEAR:1998#
279	B3GNT35g	UDP-GlcNAc:betaGal beta-1,3-N-acetylglucosaminyltransferase 3, Golgi apparatus	Sphingolipid Metabolism		( 10331.1 )	0	1000	4	NJ	Kolter T, Sandhoff K#TITLE:Recent advances in the biochemistry of sphingolipidoses#JOURNAL:Brain Pathology#YEAR:1998#
280	B3GNT36g	UDP-GlcNAc:betaGal beta-1,3-N-acetylglucosaminyltransferase 3, Golgi apparatus	Sphingolipid Metabolism		( 10331.1 )	0	1000	4	NJ	Kolter T, Sandhoff K#TITLE:Recent advances in the biochemistry of sphingolipidoses#JOURNAL:Brain Pathology#YEAR:1998#;Zhou D, Dinter A, Gutierrez Gallego R, Kamerling JP, Vliegenthart JF, Berger EG, Hennet T. #TITLE:A beta-1,3-N-acetylglucosaminyltransferase with poly-N-acetyllactosamine synthase activity is structurally related to beta-1,3-galactosyltransferases. #JOURNAL:Proc Natl Acad Sci#YEAR…
281	B3GNT37g	UDP-GlcNAc:betaGal beta-1,3-N-acetylglucosaminyltransferase 3, Golgi apparatus	Sphingolipid Metabolism		( 10331.1 )	0	1000	4	NJ	Kolter T, Sandhoff K#TITLE:Recent advances in the biochemistry of sphingolipidoses#JOURNAL:Brain Pathology#YEAR:1998#
282	B3GNT38g	UDP-GlcNAc:betaGal beta-1,3-N-acetylglucosaminyltransferase 3, Golgi apparatus	Sphingolipid Metabolism		( 10331.1 )	0	1000	4	NJ	Kolter T, Sandhoff K#TITLE:Recent advances in the biochemistry of sphingolipidoses#JOURNAL:Brain Pathology#YEAR:1998#
283	B3GNT39g	UDP-GlcNAc:betaGal beta-1,3-N-acetylglucosaminyltransferase 3, Golgi apparatus	Sphingolipid Metabolism		( 10331.1 )	0	1000	4	NJ	Kolter T, Sandhoff K#TITLE:Recent advances in the biochemistry of sphingolipidoses#JOURNAL:Brain Pathology#YEAR:1998#
284	B3GNT51g	UDP-GlcNAc:betaGal beta-1,3-N-acetylglucosaminyltransferase 5	Blood Group Biosynthesis		( 84002.1 )	0	1000	2	NJ
285	BAAT2x	bile acid Coenzyme A: amino acid N-acyltransferase	Bile Acid Biosynthesis	2.3.1.65	( 570.1 )	0	1000	4	glycine or taurine as substrates, produces glycocholic or taurocholic acids respectively NJ	Russell DW#TITLE:The enzymes, regulation, and genetics of bile acid synthesis#JOURNAL:Annu Rev Biochem#YEAR:2003#;Falany CN, Johnson MR, Barnes S, Diasio RB#TITLE:Glycine and taurine conugation of bile acids by a single enzyme#JOURNAL:Journal of Biological Chemistry#YEAR:1994#
286	BAAT3x	bile acid Coenzyme A: amino acid N-acyltransferase	Bile Acid Biosynthesis	2.3.1.65	( 570.1 )	0	1000	2	third version analog added as per KEGG NJ	Russell DW#TITLE:The enzymes, regulation, and genetics of bile acid synthesis#JOURNAL:Annu Rev Biochem#YEAR:2003#;Falany CN, Johnson MR, Barnes S, Diasio RB#TITLE:Glycine and taurine conugation of bile acids by a single enzyme#JOURNAL:Journal of Biological Chemistry#YEAR:1994#
287	BAAT5x	bile acid Coenzyme A: amino acid N-acyltransferase	Bile Acid Biosynthesis	2.3.1.65	( 570.1 )	0	1000	2	fifth version added in analogy to BAAT1x and BAAT2x NJ	Russell DW#TITLE:The enzymes, regulation, and genetics of bile acid synthesis#JOURNAL:Annu Rev Biochem#YEAR:2003#;Falany CN, Johnson MR, Barnes S, Diasio RB#TITLE:Glycine and taurine conugation of bile acids by a single enzyme#JOURNAL:Journal of Biological Chemistry#YEAR:1994#
288	BALAVECSEC	B-alanine secretion via secretory vesicle (ATP driven)	Transport, Extracellular		( 140679.1 )	0	1000	4	SAB This reaction represents the ATP driven secretion of glu from the cell. It leaves out the vesicle because a compartment is not available for that. ATP demand is not known for sure stoichiometrically, but 1:1 H coupling ratio is assumed, which could translate to 3 b-ala/ATP.	Gasnier B#TITLE:The SLC32 transporter, a key protein for the synaptic release of inhibitory amino acids#JOURNAL:Pflugers Arch#YEAR:2004#PUBMED:12750892#;Wagner CA, Finberg KE, Breton S, Marshansky V, Brown D, Geibel JP#TITLE:Renal vacuolar H+-ATPase#JOURNAL:Physiol Rev#YEAR:2004#PUBMED:15383652#
289	BALAtmr	Beta-alanine reversible mitochondrial transport (diffusion)	Transport, Mitochondrial			-1000	1000	1	SAB	Ohyama T, Matsuda K, Tachibana H, Fujimoto Sakata S, Mori M, Horiuchi M, Tamaki N#TITLE:Purification and expression of a processing protease on beta-alanine-oxoglutarate aminotransferase from rat liver mitochondria#JOURNAL:FEBS Lett#YEAR:2004#PUBMED:15304357#
290	BAMPPALDOX	beta-Aminopropion aldehyde:NAD+ oxidoreductase	beta-Alanine metabolism	1.2.1.3	( 8854.2 ) or ( 501.1 ) or ( 216.1 ) or ( 224.1 ) or ( 8854.3 ) or ( 223.1 ) or ( 8854.1 )	0	1000	1	SAB	White WH, Skatrud PL, Xue Z, Toyn JH#TITLE:Specialization of function among aldehyde dehydrogenases: the ALD2 and ALD3 genes are required for beta-alanine biosynthesis in Saccharomyces cerevisiae#JOURNAL:Genetics#YEAR:2003#PUBMED:12586697#
291	BDHm	(R)-3-Hydroxybutanoate:NAD+ oxidoreductase	Butanoate Metabolism	1.1.1.30	( 622.2 ) or ( 622.3 ) or ( 622.1 )	-1000	1000	4	IT	Marks AR, McIntyre JO, Duncan TM, Erdjument-Bromage H, Tempst P, Fleischer S#TITLE:Molecular cloning and characterization of (R)-3-hydroxybutyrate dehydrogenase from human heart#JOURNAL:J Biol Chem#YEAR:1992#PUBMED:1639787#;Green D, Marks AR, Fleischer S, McIntyre JO#TITLE:Wild type and mutant human heart (R)-3-hydroxybutyrate dehydrogenase expressed in insect cells#JOURNAL:Biochemistry#YEAR:1996…
292	BDMT_L	GDPmannose:chitobiosyldiphosphodolichol beta-D-mannosyltransferase (liver)	N-Glycan Biosynthesis	2.4.1.142	( 56052.1 )	0	1000	0	NCD
293	BDMT_U	GDPmannose:chitobiosyldiphosphodolichol beta-D-mannosyltransferase (uterus)	N-Glycan Biosynthesis	2.4.1.142	( 56052.1 )	0	1000	0	NCD
294	BETALDHx	betaine-aldehyde dehydrogenase	Glycine, Serine, and Threonine Metabolism	1.2.1.8	( 223.1 )	0	1000	4	JLR	Chern MK, Pietruszko R.#TITLE:Human aldehyde dehydrogenase E3 isozyme is a betaine aldehyde dehydrogenase. #YEAR:1995#PUBMED:7646513#;Craig SA.#TITLE:Betaine in human nutrition.#YEAR:2004#PUBMED:15321791#
295	BETALDHxm	betaine-aldehyde dehydrogenase, mitochondrial	Glycine, Serine, and Threonine Metabolism	1.2.1.8		0	1000	2	MM	Craig SA.#TITLE:Betaine in human nutrition.#YEAR:2004#PUBMED:15321791#
296	BHBtm	(R)-3-Hydroxybutanoate mitochondrial transport via H+ symport	Transport, Mitochondrial			-1000	1000	4	IT, TDV	Latruffe N.#TITLE:Transport of D-beta-hydroxybutyrate across rat liver mitochondrial membranes. #JOURNAL:Comp Biochem Physiol B#YEAR:1987#PUBMED:3427918#
297	BHMT	betaine-homocysteine S-methyltransferase	Glycine, Serine, and Threonine Metabolism	2.1.1.5	( 23743.1 ) or ( 635.1 )	0	1000	4	LOCUS:_635#TRANSCRIPT:1#ABBREVIATION:BHMT#ECNUMBERS:2.1.1.5#	Sunden SL, Renduchintala MS, Park EI, Miklasz SD, Garrow TA.#TITLE:Betaine-homocysteine methyltransferase expression in porcine and human tissues and chromosomal localization of the human gene.#YEAR:1997#PUBMED:9281325#
298	BILDGLCURte	bilirubin beta-diglucuronide transport MDR	Transport, Extracellular		( 4363.1 )	-1000	1000	2	NJ
299	BILDGLCURtr	glucuronidated compound transport	Transport, Endoplasmic Reticular			0	0	2	unknown mechanism, however glucuronidated metabolites need to get out of the cell NJ
300	BILGLCURt	bilirubin monoglucuronide transport via bicarbonate countertransport	Transport, Extracellular		( 10599.1 ) or ( 28234.1 )	-1000	1000	4	NJ	Hagenbuch B, Meier PJ.#TITLE:The superfamily of organic anion transporting polypeptides.#JOURNAL:Biochim Biophys Acta.#YEAR:2003#PUBMED:12507753#;Satlin LM, Amin V, Wolkoff AW.#TITLE:Organic anion transporting polypeptide mediates organic anion/HCO3- exchange.#JOURNAL:J Biol Chem.#YEAR:1997#PUBMED:9334206#;Abe T, Kakyo M, Tokui T, Nakagomi R, Nishio T, Nakai D, Nomura H, Unno M, Suzuki M, Naitoh …
301	BILGLCURte	bilirubin monoglucuronide transport MDR	Transport, Extracellular		( 4363.1 )	-1000	1000	2	NJ
302	BILIRED	Nad(p)h biliverdin reductase	Heme Degradation	1.3.1.24	( 645.1 ) or ( 644.1 )	0	1000	0	TDV	Baranano DE, Rao M, Ferris CD, Snyder SH.#TITLE:Biliverdin reductase: a major physiologic cytoprotectant. #JOURNAL:Proc Natl Acad Sci U S A#YEAR:2002#PUBMED:12456881#;Chikuba K, Yubisui T, Shirabe K, Takeshita M.#TITLE:Cloning and nucleotide sequence of a cDNA of the human erythrocyte NADPH-flavin reductase. #JOURNAL:Biochem Biophys Res Commun. #YEAR:1994#PUBMED:8117274#;Saito F, Yamaguchi T, Kom…
303	BMTer_L	B mannosyltransferase, endoplasmic reticulum	Glycosylphosphatidylinositol (GPI)-anchor biosynthesis		( 9488.1 )	0	0	4	NCD	Varki, Cummings, Esko, Freeze, Hart, Marth#TITLE:Essentials of Glycobiology#YEAR:1999#;Takahashi M, Inoue N, Ohishi K, Maeda Y, Nakamura N, Endo Y, Fujita T, Takeda J, Kinoshita T#TITLE:PIG-B, a membrane protein of the endoplasmic reticulum with a large lumenal domain, is involved in transferring the third mannose of the GPI anchor#JOURNAL:EMBO J#YEAR:1996#PUBMED:8861954#
304	BPNT	3',5'-bisphosphate nucleotidase	Nucleotides	3.1.3.7	( 10380.1 )	0	1000	4	LOCUS:_10380#TRANSCRIPT:1#ABBREVIATION:BPNT1#ECNUMBERS:3.1.3.7#	Spiegelberg BD, Xiong JP, Smith JJ, Gu RF, York JD.#TITLE:Cloning and characterization of a mammalian lithium-sensitive bisphosphate 3&apos;-nucleotidase inhibited by inositol 1,4-bisphosphate#JOURNAL:J Biol Chem#YEAR:1999#PUBMED:10224133#
305	BPNT2	3',5'-bisphosphate nucleotidase (paps)	Nucleotides	3.1.3.7	( 10380.1 )	0	1000	4	LOCUS:_10380#TRANSCRIPT:1#ABBREVIATION:BPNT1#ECNUMBERS:3.1.3.7#	Spiegelberg BD, Xiong JP, Smith JJ, Gu RF, York JD.#TITLE:Cloning and characterization of a mammalian lithium-sensitive bisphosphate 3&apos;-nucleotidase inhibited by inositol 1,4-bisphosphate#JOURNAL:J Biol Chem#YEAR:1999#PUBMED:10224133#
306	BTNt2	Biotin reversible transport via proton symport	Transport, Extracellular		( 6566.1 )	-1000	1000	4	NCD	Daberkow RL, White BR, Cederberg RA, Griffin JB, Zempleni J.#TITLE:Monocarboxylate transporter 1 mediates biotin uptake in human peripheral blood mononuclear cells.#JOURNAL:J Nutr. #YEAR:2003#;Halestrap AP, Price NT#TITLE:The proton-linked monocarboxylate transporter (MCT) family: structure, function and regulation#JOURNAL:Biochem J#YEAR:1999#PUBMED:10510291#;Garcia CK, Li X, Luna J, Francke U#TI…
307	BTNt3i	Biotin transport via sodium symport	Transport, Extracellular		( 8884.1 )	0	1000	4	_01-25-05 based on Wang et al., 1999, JBC, 274(21), 14875-14888. IT 03-07-05:replaced IT: now based on Balamurugan et al, 2005, Am J Physiol Renal Physiol, 288, F823-831,2005	Prasad PD, Wang H, Kekuda R, Fujita T, Fei YJ, Devoe LD, Leibach FH, Ganapathy V.#TITLE:Cloning and functional expression of a cDNA encoding a mammalian sodium-dependent vitamin transporter mediating the uptake of pantothenate, biotin, and lipoate.#JOURNAL: J Biol Chem.#YEAR:1998#PUBMED:9516450#;Balamurugan K, Ortiz A, Said HM.#TITLE:Biotin uptake by human intestinal and liver epithelial cells: r…
308	BTNt4i	Biotin uptake (antiport)	Transport, Extracellular		( 80704.1 )	0	1000	4	IT	Vlasova TI, Stratton SL, Wells AM, Mock NI, Mock DM.#TITLE:Biotin deficiency reduces expression of SLC19A3, a potential biotin transporter, in leukocytes from human blood.#JOURNAL:J Nutr.#YEAR:2005#PUBMED:15623830#;Ganapathy V, Smith SB, Prasad PD.#TITLE:SLC19: the folate/thiamine transporter family.#JOURNAL:Pflugers Arch. #YEAR:2004#PUBMED:14770311#
309	BUP2	beta-ureidopropionase (D-3-amino-isobutanoate forming)	Pyrimidine Catabolism	3.5.1.6	( 51733.1 )	0	1000	4	MM	Devlin, TM#TITLE:Textbook of Biochemistry with Clinical Correlations#YEAR:2001#;Orten JM, Neuhaus OW.#TITLE:Human Biochemistry#YEAR:1975#;Sakamoto T, Sakata SF, Matsuda K, Horikawa Y, Tamaki N.#TITLE:Expression and properties of human liver beta-ureidopropionase.#JOURNAL:J Nutr Sci Vitaminol (Tokyo). #YEAR:2001#PUBMED:11508704#;Kakimoto Y, Taniguchi K, Sano I.#TITLE:D-beta-aminoisobutyrate:pyruva…
310	BUTt2m	Butyrate mitochondrial transport via proton symport, reversible	Transport, Mitochondrial		( 6566.1 )	-1000	1000	0	NCD
311	BUTt2r	Butyrate transport via proton symport, reversible	Transport, Extracellular		( 6566.1 )	-1000	1000	4	JLR	Halestrap AP, Price NT#TITLE:The proton-linked monocarboxylate transporter (MCT) family: structure, function and regulation#JOURNAL:Biochem J#YEAR:1999#PUBMED:10510291#;Garcia CK, Li X, Luna J, Francke U#TITLE:cDNA cloning of the human monocarboxylate transporter 1 and chromosomal localization of the SLC16A1 locus to 1p13.2-p12#JOURNAL:Genomics#YEAR:1994#PUBMED:7835905#;Poole RC, Halestrap AP#TIT…
312	B_MANNASEly	beta-mannosidase, lysosomal	N-Glycan Degradation	3.2.1.25	( 4126.1 )	0	1000	0	NCD	Alkhayat AH, Kraemer SA, Leipprandt JR, Macek M, Kleijer WJ, Friderici KH.#TITLE:Human beta-mannosidase cDNA characterization and first identification of a mutation associated with human beta-mannosidosis#JOURNAL:Hum Mol Genet#YEAR:1998#PUBMED:9384606#
313	C14STRr	C-14 sterol reductase	Cholesterol Metabolism	1.3.1.70	( 7108.1 )	0	1000	4	NCD ER version NJ	Marijanovic Z, Laubner D, Moller G, Gege C, Husenn B, Adamski J, Breitling R#TITLE:Closing the gap: Identification of human 3-ketosteroid reductase, the last unknown enzyme of mammalian cholesterol biosynthesis#JOURNAL:Molecular Endocrinology#YEAR:2005#
314	C160CPT1	carnitine O-palmitoyltransferase	Carnitine shuttle	2.3.1.21	( 126129.1 ) or ( 1375.3 ) or ( 1374.1 ) or ( 1375.2 ) or ( 1375.1 ) or ( 1375.4 )	0	1000	4	LOCUS:_1375#TRANSCRIPT:1#ABBREVIATION:CPT1B#	Finocchiaro G, Taroni F, Rocchi M, Martin AL, Colombo I, Tarelli GT, DiDonato S. #TITLE:cDNA cloning, sequence analysis, and chromosomal localization of the gene for human carnitine palmitoyltransferase. #JOURNAL:Proc Natl Acad Sci U S A.#YEAR:1991#PUBMED:1988962#
315	C160CPT2	C160 transport into the mitochondria	Carnitine shuttle		( 1376.1 )	0	1000	4	TV	Finocchiaro G, Taroni F, Rocchi M, Martin AL, Colombo I, Tarelli GT, DiDonato S. #TITLE:cDNA cloning, sequence analysis, and chromosomal localization of the gene for human carnitine palmitoyltransferase. #JOURNAL:Proc Natl Acad Sci U S A.#YEAR:1991#PUBMED:1988962#;Taroni F, Verderio E, Fiorucci S, Cavadini P, Finocchiaro G, Uziel G, Lamantea E, Gellera C, DiDonato S.#TITLE:Molecular characterizat…
316	C160CRNt	C160 transport into the mitochondria	Carnitine shuttle		( 788.1 )	0	1000	4	TV	Palmieri, F.#TITLE: The mitochondrial transporter family (SLC25): physiological and pathological implications.#JOURNAL: Pflugers Archive#YEAR:2004#PUBMED:14598172#
317	C161CPT1	carnitine O-palmitoyltransferase	Carnitine shuttle	2.3.1.21	( 1375.1 ) or ( 1375.3 ) or ( 1375.4 ) or ( 126129.1 ) or ( 1374.1 ) or ( 1375.2 )	0	1000	4	TDV
318	C161CPT12	carnitine O-palmitoyltransferase	Carnitine shuttle	2.3.1.21	( 126129.1 ) or ( 1375.3 ) or ( 1375.1 ) or ( 1375.2 ) or ( 1374.1 ) or ( 1375.4 )	0	1000	4	NJ
319	C161CPT2	C161 transport into the mitochondria	Carnitine shuttle		( 1376.1 )	0	1000	4	TDV
320	C161CPT22	C161 transport into the mitochondria	Carnitine shuttle		( 1376.1 )	0	1000	4	NJ
321	C161CRN2t	C161 transport into the mitochondria	Carnitine shuttle		( 788.1 )	0	1000	4	NJ
322	C161CRNt	C161 transport into the mitochondria	Carnitine shuttle		( 788.1 )	0	1000	4	TDV
323	C180CPT1	carnitine O-stearoyl transferase	Carnitine shuttle	2.3.1.21	( 1375.4 ) or ( 1375.2 ) or ( 126129.1 ) or ( 1375.1 ) or ( 1374.1 ) or ( 1375.3 )	0	1000	4	TV (see C160CRN)	Finocchiaro G, Taroni F, Rocchi M, Martin AL, Colombo I, Tarelli GT, DiDonato S. #TITLE:cDNA cloning, sequence analysis, and chromosomal localization of the gene for human carnitine palmitoyltransferase. #JOURNAL:Proc Natl Acad Sci U S A.#YEAR:1991#PUBMED:1988962#
324	C180CPT2	carnitine O-stearoyl transferase	Carnitine shuttle		( 1376.1 )	0	1000	4	TV	Finocchiaro G, Taroni F, Rocchi M, Martin AL, Colombo I, Tarelli GT, DiDonato S. #TITLE:cDNA cloning, sequence analysis, and chromosomal localization of the gene for human carnitine palmitoyltransferase. #JOURNAL:Proc Natl Acad Sci U S A.#YEAR:1991#PUBMED:1988962#;Taroni F, Verderio E, Fiorucci S, Cavadini P, Finocchiaro G, Uziel G, Lamantea E, Gellera C, DiDonato S.#TITLE:Molecular characterizat…
325	C180CRNt	C180 transport into the mitochondria	Carnitine shuttle		( 788.1 )	0	1000	4	TV	Palmieri, F.#TITLE: The mitochondrial transporter family (SLC25): physiological and pathological implications.#JOURNAL: Pflugers Archive#YEAR:2004#PUBMED:14598172#
326	C181CPT1	carnitine octadecenoyl transferase	Carnitine shuttle	2.3.1.21	( 126129.1 ) or ( 1375.3 ) or ( 1374.1 ) or ( 1375.2 ) or ( 1375.1 ) or ( 1375.4 )	0	1000	4	TDV	Finocchiaro G, Taroni F, Rocchi M, Martin AL, Colombo I, Tarelli GT, DiDonato S. #TITLE:cDNA cloning, sequence analysis, and chromosomal localization of the gene for human carnitine palmitoyltransferase. #JOURNAL:Proc Natl Acad Sci U S A.#YEAR:1991#PUBMED:1988962#
327	C181CPT2	carnitine octadecenoyl transferase	Carnitine shuttle		( 1376.1 )	0	1000	4	TDV	Finocchiaro G, Taroni F, Rocchi M, Martin AL, Colombo I, Tarelli GT, DiDonato S. #TITLE:cDNA cloning, sequence analysis, and chromosomal localization of the gene for human carnitine palmitoyltransferase. #JOURNAL:Proc Natl Acad Sci U S A.#YEAR:1991#PUBMED:1988962#;Taroni F, Verderio E, Fiorucci S, Cavadini P, Finocchiaro G, Uziel G, Lamantea E, Gellera C, DiDonato S.#TITLE:Molecular characterizat…
328	C181CRNt	C181 transport into the mitochondria	Carnitine shuttle		( 788.1 )	0	1000	4	TDV	Palmieri, F.#TITLE: The mitochondrial transporter family (SLC25): physiological and pathological implications.#JOURNAL: Pflugers Archive#YEAR:2004#PUBMED:14598172#
329	C204CPT1	carnitine C20:4 transferase	Carnitine shuttle	2.3.1.21	( 1374.1 ) or ( 1375.4 ) or ( 1375.1 ) or ( 1375.3 ) or ( 1375.2 ) or ( 126129.1 )	0	1000	4	TDV	Finocchiaro G, Taroni F, Rocchi M, Martin AL, Colombo I, Tarelli GT, DiDonato S. #TITLE:cDNA cloning, sequence analysis, and chromosomal localization of the gene for human carnitine palmitoyltransferase. #JOURNAL:Proc Natl Acad Sci U S A.#YEAR:1991#PUBMED:1988962#
330	C204CPT2	arachidonic acid transport into the mitochondria	Carnitine shuttle		( 1376.1 )	0	1000	4	TDV C20:4 transport	Finocchiaro G, Taroni F, Rocchi M, Martin AL, Colombo I, Tarelli GT, DiDonato S. #TITLE:cDNA cloning, sequence analysis, and chromosomal localization of the gene for human carnitine palmitoyltransferase. #JOURNAL:Proc Natl Acad Sci U S A.#YEAR:1991#PUBMED:1988962#;Taroni F, Verderio E, Fiorucci S, Cavadini P, Finocchiaro G, Uziel G, Lamantea E, Gellera C, DiDonato S.#TITLE:Molecular characterizat…
331	C204CRNt	arachidonic acid transport into the mitochondria	Carnitine shuttle			0	1000	4	TDV C20:4 transport	Palmieri, F.#TITLE: The mitochondrial transporter family (SLC25): physiological and pathological implications.#JOURNAL: Pflugers Archive#YEAR:2004#PUBMED:14598172#
332	C226COAtx	fatty acid intracellular transport	Transport, Peroxisomal			-1000	1000	2	interaction between peroxisomes and ER (some enzymes on the outer membrane) NJ	Sprecher H#TITLE:An update on the pathways of polyunsaturated fatty acid metabolism#JOURNAL:Curr Opn in Clinical Nutrition and Metabolic Care#YEAR:1999#
333	C226CPT1	carnitine C22:6 transferase	Carnitine shuttle	2.3.1.21	( 126129.1 ) or ( 1375.3 ) or ( 1374.1 ) or ( 1375.2 ) or ( 1375.1 ) or ( 1375.4 )	0	1000	4	TDV	Finocchiaro G, Taroni F, Rocchi M, Martin AL, Colombo I, Tarelli GT, DiDonato S. #TITLE:cDNA cloning, sequence analysis, and chromosomal localization of the gene for human carnitine palmitoyltransferase. #JOURNAL:Proc Natl Acad Sci U S A.#YEAR:1991#PUBMED:1988962#
334	C226CPT2	C226 transport into the mitochondria	Carnitine shuttle		( 1376.1 )	0	1000	4	TDV	Finocchiaro G, Taroni F, Rocchi M, Martin AL, Colombo I, Tarelli GT, DiDonato S. #TITLE:cDNA cloning, sequence analysis, and chromosomal localization of the gene for human carnitine palmitoyltransferase. #JOURNAL:Proc Natl Acad Sci U S A.#YEAR:1991#PUBMED:1988962#;Taroni F, Verderio E, Fiorucci S, Cavadini P, Finocchiaro G, Uziel G, Lamantea E, Gellera C, DiDonato S.#TITLE:Molecular characterizat…
335	C226CRNt	C226 transport into the mitochondria	Carnitine shuttle			0	1000	4	TDV	Palmieri, F.#TITLE: The mitochondrial transporter family (SLC25): physiological and pathological implications.#JOURNAL: Pflugers Archive#YEAR:2004#PUBMED:14598172#
336	C3STDH1r	C-3 sterol dehydrogenase (4-methylzymosterol)	Cholesterol Metabolism	5.3.3.1	( 50814.1 )	0	0	4	NCD ER version NJ	Marijanovic Z, Laubner D, Moller G, Gege C, Husenn B, Adamski J, Breitling R#TITLE:Closing the gap: Identification of human 3-ketosteroid reductase, the last unknown enzyme of mammalian cholesterol biosynthesis#JOURNAL:Molecular Endocrinology#YEAR:2005#
337	C3STKR2r	C-3 sterol keto reductase (zymosterol)	Cholesterol Metabolism		( 3295.1 )	0	1000	4	NCD ER - NJ	Marijanovic Z, Laubner D, Moller G, Gege C, Husenn B, Adamski J, Breitling R#TITLE:Closing the gap: Identification of human 3-ketosteroid reductase, the last unknown enzyme of mammalian cholesterol biosynthesis#JOURNAL:Molecular Endocrinology#YEAR:2005#
338	C4STMO1r	C-4 sterol methyl oxidase (4,4-dimethylzymosterol)	Cholesterol Metabolism		( 6307.1 )	0	1000	4	EC 1.-.-.- NCD ER version NJ	Marijanovic Z, Laubner D, Moller G, Gege C, Husenn B, Adamski J, Breitling R#TITLE:Closing the gap: Identification of human 3-ketosteroid reductase, the last unknown enzyme of mammalian cholesterol biosynthesis#JOURNAL:Molecular Endocrinology#YEAR:2005#
339	C4STMO2r	C-4 methyl sterol oxidase	Cholesterol Metabolism		( 6307.1 ) or ( 50814.1 )	0	1000	4	double check rxn specifics - see lit ref: Marijanovic, Molecular Endocrinology 2003 17:1715-1725 ER version NJ	Marijanovic Z, Laubner D, Moller G, Gege C, Husenn B, Adamski J, Breitling R#TITLE:Closing the gap: Identification of human 3-ketosteroid reductase, the last unknown enzyme of mammalian cholesterol biosynthesis#JOURNAL:Molecular Endocrinology#YEAR:2005#
340	CAATPS	Ca ATPase	Transport, Extracellular	3.6.3.6	( 492.1 ) or ( 491.1 ) or ( 490.1 ) or ( 493.1 )	0	1000	4	plasma membrane version (SR and ER versions also exist) stoichiometry actually varies (number of Ca/ATP transported). See PMID: 7876199 NJ	Hilfiker H, Strehler-Page MA, Stauffer TP, Carafoli E, Strehler EE.#TITLE:Structure of the gene encoding the human plasma membrane calcium pump isoform 1.#JOURNAL:J Biol Chem#YEAR:1993#PUBMED:8396145#;Yu X, Inesi G.#TITLE:Variable stoichiometric efficiency of Ca2+ and Sr2+ transport by the sarcoplasmic reticulum ATPase.#JOURNAL:J Biol Chem#YEAR:1995#PUBMED:7876199#
341	CAMPt	cAMP transport (ATP-dependent)	Transport, Extracellular		( 10257.1 ) or ( 10057.2 ) or ( 10057.1 )	0	1000	4	IT	Chen ZS, Lee K, Kruh GD.#TITLE:Transport of cyclic nucleotides and estradiol 17-beta-D-glucuronide by multidrug resistance protein 4. Resistance to 6-mercaptopurine and 6-thioguanine.#JOURNAL:J Biol Chem. #YEAR:2001#PUBMED:11447229#;Reid G, Wielinga P, Zelcer N, van der Heijden I, Kuil A, de Haas M, Wijnholds J, Borst P. #TITLE:The human multidrug resistance protein MRP4 functions as a prostaglan…
342	CATm	catalase	ROS Detoxification	1.11.1.6	( 847.1 )	0	1000	4	TV	Radi R, Turrens JF, Chang LY, Bush KM, Crapo JD, Freeman BA.#TITLE:Detection of catalase in rat heart mitochondria.#JOURNAL:J Biol Chem#YEAR:1991#PUBMED:1657986#;Quan F, Korneluk RG, Tropak MB, Gravel RA.#TITLE:Isolation and characterization of the human catalase gene.#JOURNAL:Nucleic Acids Res#YEAR:1986#PUBMED:3755525#
343	CATp	catalase A, peroxisomal	Miscellaneous	1.11.1.6	( 847.1 )	0	1000	0	NCD
344	CAt7r	calcium / sodium antiporter (1:3), reversible	Transport, Extracellular		( 6547.6 ) or ( 6547.4 ) or ( 6547.2 ) or ( 6546.1 ) or ( 6547.1 ) or ( 6547.5 ) or ( 6543.1 ) or ( 6547.3 )	-1000	1000	4	MM	Gabellini,N., Bortoluzzi,S., Danieli,G.A., Carafoli,E., #TITLE:The human SLC8A3 gene and the tissue-specific Na+/Ca2+ exchanger 3 isoforms. #YEAR:2002#PUBMED:12406570#;Schnetkamp PP.#TITLE:Na-Ca or Na-Ca-K exchange in rod photoreceptors.#YEAR:1989#PUBMED:2484986#
345	CBPPer	Carbamoyl phosphate phosphotransferase, endoplasmic reticulum	Glycolysis/Gluconeogenesis		( 2538.1 ) or ( 57818.1 ) or ( 92579.1 )	0	1000	2	See PMID: 11946414 NCD	Orten JM, Neuhaus OW.#TITLE:Human Biochemistry#YEAR:1975#;Lueck JD, Nordlie RC.#TITLE:The utilization of intramitochondrially generated carbamyl phosphate for microsomal glucose 6-phosphate biosynthesis.#JOURNAL:FEBS Lett#YEAR:1972#PUBMED:11946414#;Lucius RW, Waddell ID, Burchell A, Nordlie RC#TITLE:The hepatic glucose-6-phosphatase system in Ehrlich-ascites-tumour-bearing mice#JOURNAL:Biochem J.…
346	CBPS	carbamoyl-phosphate synthase (glutamine-hydrolysing)	Pyrimidine Biosynthesis	6.3.5.5	( 790.1 )	0	1000	4	LOCUS:_790#TRANSCRIPT:1#ABBREVIATION:CAD1#ECNUMBERS:6.3.5.5,2.1.3.2,3.5.2.3#	Iwahana H, Fujimura M, Ii S, Kondo M, Moritani M, Takahashi Y, Yamaoka T, Yoshimoto K, Itakura M.#TITLE:Molecular cloning of a human cDNA encoding a trifunctional enzyme of carbamoyl-phosphate synthetase-aspartate transcarbamoylase-dihydroorotase in de Novo pyrimidine synthesis. #JOURNAL:Biochem Biophys Res Commun.#YEAR:1996#PUBMED:8619816#;Chen KC, Vannais DB, Jones C, Patterson D, Davidson JN.#…
347	CBPSam	carbamoyl-phosphate synthase (ammonia) (mitochondria	Glutamate metabolism	6.3.4.16	( 1373.1 ) or ( 1373.2 )	0	1000	4	MM	Summar ML, Hall LD, Eeds AM, Hutcheson HB, Kuo AN, Willis AS, Rubio V, Arvin MK, Schofield JP, Dawson EP.#TITLE:Characterization of genomic structure and polymorphisms in the human carbamyl phosphate synthetase I gene.#JOURNAL:Gene#YEAR:2003#PUBMED:12853138#;Uriarte M, Marina A, Ramon-Maiques S, Fita I, Rubio V.#TITLE:The carbamoyl-phosphate synthetase of Pyrococcus furiosus is enzymologically an…
348	CBPter	carbamoyl phosphate transport, endoplasmic reticulum	Transport, Endoplasmic Reticular			-1000	1000	2	NCD	Lucius RW, Waddell ID, Burchell A, Nordlie RC#TITLE:The hepatic glucose-6-phosphatase system in Ehrlich-ascites-tumour-bearing mice#JOURNAL:Biochem J.#YEAR:1993#PUBMED:8384451#;Foster JD, Nordlie RC#TITLE:The biochemistry and molecular biology of the glucose-6-phosphatase system.#JOURNAL:Exp Biol Med (Maywood)#YEAR:2002#PUBMED:12192101#
349	CBR2	Carbonyl reductase [NADPH] 1	Eicosanoid Metabolism		( 873.1 )	0	1000	4	multiple EC EC 1.1.1.189 EC 1.1.1.197 NJ	Watanabe K, Sugawara C, Ono A, Fukuzumi Y, Itakura S, Yamazaki M, Tashiro H, Osoegawa K, Soeda E, Nomura T.#TITLE:Mapping of a novel human carbonyl reductase, CBR3, and ribosomal pseudogenes to human chromosome 21q22.2.#JOURNAL:Genomics#YEAR:1998#PUBMED:9740676#;Okita RT, Okita JR.#TITLE:Prostaglandin-metabolizing enzymes during pregnancy: characterization of NAD(+)-dependent prostaglandin dehydr…
350	CDIPTr	phosphatidylinositol synthase (Homo sapiens)	Glycerophospholipid Metabolism	2.7.8.11	( 10423.1 ) or ( 10423.2 )	-1000	1000	4	NJ - reversibility of enzyme found in lit by NCD	Voet D, Voet JG#TITLE:Biochemistry#YEAR:1995#;Murray RK, Granner DK, Mayes PA, Rodwell VW#TITLE:Harper&apos;s Biochemistry#YEAR:1999#;Kent C#TITLE:Eukaryotic phospholipid biosynthesis#JOURNAL:Annu Rev Biochem#YEAR:1995#;Lykidis A, Jackson PD, Rock CO, Jackowski S#TITLE:The role of CDP-diacylglycerol synthetase and phosphatidylinositol synthase activity levels in the regulation of cellular phospha…
351	CDPDAGtm	intracellular transport	Transport, Mitochondrial			-1000	1000	1	unknown mechanism, presumed diffusion NJ
352	CDS	phosphatidate cytidylyltransferase	Glycerophospholipid Metabolism	2.7.7.41	( 1040.1 )	0	1000	4	ER membrane - but on cytosolic surface NJ	Murray RK, Granner DK, Mayes PA, Rodwell VW#TITLE:Harper&apos;s Biochemistry#YEAR:1999#;Kent C#TITLE:Eukaryotic phospholipid biosynthesis#JOURNAL:Annu Rev Biochem#YEAR:1995#;Halford S, Dulai KS, Daw SC, Fitzgibbon J, Hunt DM#TITLE:Isolation and chromosomal localization of two human cdp-diacylglycerol synthase genes#JOURNAL:Genomics#YEAR:1998#;Weeks R, Dowhan W, Shen H, Balantac N, Meengs B, Nudel…
353	CDSm	phosphatidate cytidylyltransferase	Glycerophospholipid Metabolism	2.7.7.41	( 8760.1 )	0	1000	4	inner mitochondrial membrane NJ	Murray RK, Granner DK, Mayes PA, Rodwell VW#TITLE:Harper&apos;s Biochemistry#YEAR:1999#;Kent C#TITLE:Eukaryotic phospholipid biosynthesis#JOURNAL:Annu Rev Biochem#YEAR:1995#;Halford S, Dulai KS, Daw SC, Fitzgibbon J, Hunt DM#TITLE:Isolation and chromosomal localization of two human cdp-diacylglycerol synthase genes#JOURNAL:Genomics#YEAR:1998#;Weeks R, Dowhan W, Shen H, Balantac N, Meengs B, Nudel…
354	CEPTC	choline phosphotransferase	Glycerophospholipid Metabolism		( 10390.1 ) or ( 56994.1 )	0	1000	4	NJ	Voet D, Voet JG#TITLE:Biochemistry#YEAR:1995#;Murray RK, Granner DK, Mayes PA, Rodwell VW#TITLE:Harper&apos;s Biochemistry#YEAR:1999#;Henneberry AL, McMaster CR#TITLE:Cloning and expression of a human choline/ethanolaminephosphotransferase: synthesis of phosphatidylcholine and phosphatidylethanolamine#JOURNAL:Biochem J#YEAR:1999#
355	CEPTE	ethanolamine phosphotransferase	Glycerophospholipid Metabolism		( 10390.1 )	0	1000	4	NJ	Voet D, Voet JG#TITLE:Biochemistry#YEAR:1995#;Murray RK, Granner DK, Mayes PA, Rodwell VW#TITLE:Harper&apos;s Biochemistry#YEAR:1999#;Henneberry AL, McMaster CR#TITLE:Cloning and expression of a human choline/ethanolaminephosphotransferase: synthesis of phosphatidylcholine and phosphatidylethanolamine#JOURNAL:Biochem J#YEAR:1999#
356	CERK	Ceramide kinase	Sphingolipid Metabolism	2.7.1.138	( 64781.1 ) or ( 64781.2 )	0	1000	4	NJ	Sugiura M, Kono K, Liu H, Shimizugawa T, Minekura H, Spiegel S, Kohama T. #TITLE:Ceramide kinase, a novel lipid kinase. Molecular cloning and functional characterization.#JOURNAL:J Biol Chem#YEAR:2002#PUBMED:11956206#
357	CERT1gt	ceramide transport protein	Transport, Golgi Apparatus		( 10087.1 )	-1000	1000	2	non-vesicular intracellular transport of ceramide	Kumagai K, Yasuda S, Okemoto K, Nishijima M, Kobayashi S, Hanada K.#TITLE:CERT mediates intermembrane transfer of various molecular species of ceramides.#JOURNAL:J Biol Chem#YEAR:2005#PUBMED:15596449#;Hanada K, Kumagai K, Yasuda S, Miura Y, Kawano M, Fukasawa M, Nishijima M.#TITLE:Molecular machinery for non-vesicular trafficking of ceramide.#JOURNAL:Nature#YEAR:2003#PUBMED:14685229#;Perry RJ, Ri…
358	CERT1rt	ceramide transport protein	Transport, Endoplasmic Reticular		( 10087.1 )	-1000	1000	2	non-vesicular intracellular transport of ceramide	Kumagai K, Yasuda S, Okemoto K, Nishijima M, Kobayashi S, Hanada K.#TITLE:CERT mediates intermembrane transfer of various molecular species of ceramides.#JOURNAL:J Biol Chem#YEAR:2005#PUBMED:15596449#;Hanada K, Kumagai K, Yasuda S, Miura Y, Kawano M, Fukasawa M, Nishijima M.#TITLE:Molecular machinery for non-vesicular trafficking of ceramide.#JOURNAL:Nature#YEAR:2003#PUBMED:14685229#;Perry RJ, Ri…
359	CERT2gt	ceramide transport protein	Transport, Golgi Apparatus		( 10087.1 )	-1000	1000	2	non-vesicular intracellular transport of glucocerebroside	Kumagai K, Yasuda S, Okemoto K, Nishijima M, Kobayashi S, Hanada K.#TITLE:CERT mediates intermembrane transfer of various molecular species of ceramides.#JOURNAL:J Biol Chem#YEAR:2005#PUBMED:15596449#;Hanada K, Kumagai K, Yasuda S, Miura Y, Kawano M, Fukasawa M, Nishijima M.#TITLE:Molecular machinery for non-vesicular trafficking of ceramide.#JOURNAL:Nature#YEAR:2003#PUBMED:14685229#;Perry RJ, Ri…
360	CERT2rt	ceramide transport protein	Transport, Endoplasmic Reticular		( 10087.1 )	-1000	1000	2	non-vesicular intracellular transport of glucocerebroside	Kumagai K, Yasuda S, Okemoto K, Nishijima M, Kobayashi S, Hanada K.#TITLE:CERT mediates intermembrane transfer of various molecular species of ceramides.#JOURNAL:J Biol Chem#YEAR:2005#PUBMED:15596449#;Hanada K, Kumagai K, Yasuda S, Miura Y, Kawano M, Fukasawa M, Nishijima M.#TITLE:Molecular machinery for non-vesicular trafficking of ceramide.#JOURNAL:Nature#YEAR:2003#PUBMED:14685229#;Perry RJ, Ri…
361	CGLYt3(2)	Cys-Gly transport in via proton symport	Transport, Extracellular		( 6565.1 )	0	1000	2	SAB	Daniel H, Kottra G#TITLE:The proton oligopeptide cotransporter family SLC15 in physiology and pharmacology#JOURNAL:Pflugers Arch#YEAR:2004#PUBMED:12905028#
362	CGMPt	cGMP transport (ATP-dependent)	Transport, Extracellular		( 10257.1 ) or ( 10057.2 ) or ( 10057.1 )	0	1000	4	IT	Chen ZS, Lee K, Kruh GD.#TITLE:Transport of cyclic nucleotides and estradiol 17-beta-D-glucuronide by multidrug resistance protein 4. Resistance to 6-mercaptopurine and 6-thioguanine.#JOURNAL:J Biol Chem. #YEAR:2001#PUBMED:11447229#;Reid G, Wielinga P, Zelcer N, van der Heijden I, Kuil A, de Haas M, Wijnholds J, Borst P. #TITLE:The human multidrug resistance protein MRP4 functions as a prostaglan…
363	CH25H	cholesterol 25-hydroxylase	Bile Acid Biosynthesis		( 9023.1 )	0	1000	4	NJ	Russell DW#TITLE:The enzymes, regulation, and genetics of bile acid synthesis#JOURNAL:Annu Rev Biochem#YEAR:2003#
364	CHAT	Choline O-acetyltransferase	Glycerophospholipid Metabolism		( 1103.4 ) or ( 1103.2 ) or ( 1103.3 ) or ( 1103.1 )	-1000	1000	4	rev by uniprot NJ	Dobransky T, Davis WL, Xiao GH, Rylett RJ.#TITLE:Expression, purification and characterization of recombinant human choline acetyltransferase: phosphorylation of the enzyme regulates catalytic activity.#JOURNAL:Biochem J#YEAR:2000#PUBMED:10861222#
365	CHATn	Choline O-acetyltransferase	Glycerophospholipid Metabolism		( 1103.4 ) or ( 1103.1 ) or ( 1103.3 ) or ( 1103.2 )	-1000	1000	4	NJ	Dobransky T, Davis WL, Xiao GH, Rylett RJ.#TITLE:Expression, purification and characterization of recombinant human choline acetyltransferase: phosphorylation of the enzyme regulates catalytic activity.#JOURNAL:Biochem J#YEAR:2000#PUBMED:10861222#
366	CHLP	choline phosphate phosphatase	Glycerophospholipid Metabolism	2.7.7.15	( 162466.1 )	0	1000	0	no high energy phosphate compounds found associated w/ rxn NJ	Roberts SJ, Stewart AJ, Sadler PJ, Farquharson C.#TITLE:Human PHOSPHO1 exhibits high specific phosphoethanolamine and phosphocholine phosphatase activities.#JOURNAL:Biochem J#YEAR:2004#PUBMED:15175005#
367	CHLPCTD	choline phosphate cytididyltransferase	Glycerophospholipid Metabolism	2.7.7.15	( 5130.1 ) or ( 9468.1 )	0	1000	4	NCD	Voet D, Voet JG#TITLE:Biochemistry#YEAR:1995#;Murray RK, Granner DK, Mayes PA, Rodwell VW#TITLE:Harper&apos;s Biochemistry#YEAR:1999#;Kent C#TITLE:Eukaryotic phospholipid biosynthesis#JOURNAL:Annu Rev Biochem#YEAR:1995#
368	CHOLATEt	cholate transport via bicarbonate countertransport	Transport, Extracellular		( 6579.1 ) or ( 10599.1 )	-1000	1000	4	NJ	Kullak-Ublick GA, Beuers U, Meier PJ, Domdey H, Paumgartner G.#TITLE:Assignment of the human organic anion transporting polypeptide (OATP) gene to chromosome 12p12 by fluorescence in situ hybridization.#JOURNAL:J Hepatol.#YEAR:1996#PUBMED:9007731#;Hagenbuch B, Meier PJ.#TITLE:The superfamily of organic anion transporting polypeptides.#JOURNAL:Biochim Biophys Acta.#YEAR:2003#PUBMED:12507753#;Satli…
369	CHOLATEt3	ABC bile acid transporter	Transport, Extracellular		( 8714.3 ) or ( 8647.1 ) or ( 8714.2 ) or ( 8714.1 )	0	1000	4	for bile acid secretion into bile NJ	Strautnieks SS, Bull LN, Knisely AS, Kocoshis SA, Dahl N, Arnell H, Sokal E, Dahan K, Childs S, Ling V, Tanner MS, Kagalwalla AF, Nemeth A, Pawlowska J, Baker A, Mieli-Vergani G, Freimer NB, Gardiner RM, Thompson RJ.#TITLE:A gene encoding a liver-specific ABC transporter is mutated in progressive familial intrahepatic cholestasis.#JOURNAL:Nat Genet.#YEAR:1998#PUBMED:9806540#;Kiuchi Y, Suzuki H, H…
370	CHOLD2m	choline dehydrogenase (FAD acceptor), mitochondrial	Glycine, Serine, and Threonine Metabolism	1.1.99.1	( 55349.1 )	0	1000	4	LOCUS:_55349#TRANSCRIPT:1#ABBREVIATION:CHDH#ECNUMBERS:1.1.99.1#	Craig SA.#TITLE:Betaine in human nutrition.#YEAR:2004#PUBMED:15321791#
371	CHOLK	Choline kinase	Glycerophospholipid Metabolism	2.7.1.32	( 1120.2 ) or ( 1119.1 ) or ( 1120.1 ) or ( 1119.2 )	0	1000	4	NCD	Voet D, Voet JG#TITLE:Biochemistry#YEAR:1995#;Activity and tissue distribution of splice variants of alpha6-fucosyltransferase in human embryogenesis.#TITLE:Martinez-Duncker I, Michalski JC, Bauvy C, Candelier JJ, Mennesson B, Codogno P, Oriol R, Mollicone R.#JOURNAL:Glycobiology#YEAR:2004#PUBMED:14514715#;Kent C#TITLE:Eukaryotic phospholipid biosynthesis#JOURNAL:Annu Rev Biochem#YEAR:1995#
372	CHOLPtg	choline phosphate intracellular transport	Transport, Golgi Apparatus			-1000	1000	1	unknown mechanism for transport - no strong evidence to indicate further lysosomal or golgi metabolism NJ
373	CHOLPtl	choline phosphate intracellular transport	Transport, Lysosomal			-1000	1000	1	unknown mechanism for transport - no strong evidence to indicate further lysosomal or golgi metabolism NJ
374	CHOLt4	choline, sodium cotransport	Transport, Extracellular		( 60482.1 )	0	0	4	NCD	Okuda T, Haga T#TITLE:High-affinity choline transporter#JOURNAL:Neurochem Res#YEAR:2003#PUBMED:12675135#;Okuda T, Haga T.#TITLE:Functional characterization of the human high-affinity choline transporter#JOURNAL:FEBS Lett#YEAR:2000#PUBMED:11068039#;Apparsundaram S, Ferguson SM, George AL Jr, Blakely RD#TITLE:Molecular cloning of a human, hemicholinium-3-sensitive choline transporter#JOURNAL:Bioche…
375	CHOLtn	Choline transport, nuclear through pores	Transport, Nuclear			-1000	1000	2	it
376	CHOLtu	Choline uniport	Transport, Extracellular		( 6582.1 ) or ( 6584.1 ) or ( 6582.2 )	-1000	1000	4	SAB electrogenic, Na indepdendent &amp; rev	Koepsell H, Endou H#TITLE:The SLC22 drug transporter family#JOURNAL:Pflugers Arch#YEAR:2004#PUBMED:12883891#
377	CHSTEROLSULT	steroid sulfotransferase	Steroid Metabolism	2.8.2.2	( 6820.1 )	0	1000	4	NJ	Her C, Wood TC, Eichler EE, Mohrenweiser HW, Ramagli LS, Siciliano MJ, Weinshilboum RM.#TITLE:Human hydroxysteroid sulfotransferase SULT2B1: two enzymes encoded by a single chromosome 19 gene.#JOURNAL:Genomics#YEAR:1998#PUBMED:9799594#;Fuda H, Lee YC, Shimizu C, Javitt NB, Strott CA.#TITLE:Mutational analysis of human hydroxysteroid sulfotransferase SULT2B1 isoforms reveals that exon 1B of the SU…
378	CHSTEROLt1	cholesterol intracellular transport	Transport, Mitochondrial		( 10948.1 )	-1000	1000	2	specific mechanism not known, proton dependence for trans-mit transport has been suggested, however directionality and stoichiometry has not yet been elucidated. see PMID: 12770731 and others NJ	Zhang M, Liu P, Dwyer NK, Christenson LK, Fujimoto T, Martinez F, Comly M, Hanover JA, Blanchette-Mackie EJ, Strauss JF 3rd.#TITLE:MLN64 mediates mobilization of lysosomal cholesterol to steroidogenic mitochondria.#JOURNAL:J Biol Chem#YEAR:2002#PUBMED:12070139#;Jefcoate C.#TITLE:High-flux mitochondrial cholesterol trafficking, a specialized function of the adrenal cortex.#JOURNAL:J Clin Invest#YE…
379	CHSTEROLt2	cholesterol intracellular transport	Transport, Mitochondrial			-1000	1000	2	specific mechanism not known, proton dependence for trans-mit transport has been suggested, however directionality and stoichiometry has not yet been elucidated. see PMID: 12770731 and others NJ	Jefcoate C.#TITLE:High-flux mitochondrial cholesterol trafficking, a specialized function of the adrenal cortex.#JOURNAL:J Clin Invest#YEAR:2002#PUBMED:12370263#;Strauss JF 3rd, Kishida T, Christenson LK, Fujimoto T, Hiroi H.#TITLE:START domain proteins and the intracellular trafficking of cholesterol in steroidogenic cells.#JOURNAL:Mol Cell Endocrinol#YEAR:2003#PUBMED:12770731#
380	CHTNASEe	chitinase, extracellular	Aminosugar Metabolism	3.2.1.14	( 27159.2 )	0	1000	4	NCD	Boot RG, Blommaart EF, Swart E, Ghauharali-van der Vlugt K, Bijl N, Moe C, Place A, Aerts JM#TITLE:Identification of a novel acidic mammalian chitinase distinct from chitotriosidase#JOURNAL:J Biol Chem#YEAR:2001#PUBMED:11085997#
381	CITL	Citrate lyase	Citric Acid Cycle	4.1.3.6	( 171425.1 ) or ( 171425.2 )	0	1000	0	JLR	Morikawa J, Nishimura Y, Uchida A, Tanaka T#TITLE:Molecular cloning of novel mouse and human putative citrate lyase beta-subunit#JOURNAL:Biochem Biophys Res Commun#YEAR:2001#PUBMED:11741334#
382	CITRtm	citrulline mitochondrial transport via proton antiport	Transport, Mitochondrial		( 83884.1 ) or ( 10166.1 )	-1000	1000	4	TDV	Palmieri, F.#TITLE: The mitochondrial transporter family (SLC25): physiological and pathological implications.#JOURNAL: Pflugers Archive#YEAR:2004#PUBMED:14598172#
383	CITt4_2	citrate transport via sodium symport	Transport, Extracellular		( 9058.1 )	-1000	1000	4	NCD	Pajor AM, Sun N#TITLE:Functional differences between rabbit and human Na(+)-dicarboxylate cotransporters, NaDC-1 and hNaDC-1.#JOURNAL:Am J Physiol#YEAR:1996#PUBMED:8946005#;Pajor AM#TITLE:Molecular cloning and functional expression of a sodium-dicarboxylate cotransporter from human kidney#JOURNAL:Am J Physiol#YEAR:1996#PUBMED:8967342#
384	CITtam	citrate transport, mitochondrial	Transport, Mitochondrial		( 6576.1 )	0	0	4	antiport with malate IF	Palmieri, F.#TITLE: The mitochondrial transporter family (SLC25): physiological and pathological implications.#JOURNAL: Pflugers Archive#YEAR:2004#PUBMED:14598172#
385	CITtbm	citrate transport, mitochondrial	Transport, Mitochondrial		( 6576.1 )	-1000	1000	4	antiport with PEP IF	Palmieri, F.#TITLE: The mitochondrial transporter family (SLC25): physiological and pathological implications.#JOURNAL: Pflugers Archive#YEAR:2004#PUBMED:14598172#
386	CK	ATP Creatine kinase	Urea cycle/amino group metabolism	2.7.3.2	( 1159.1 ) or ( 1160.1 )	-1000	1000	4	kegg C02305 MJC	Haas RC, Korenfeld C, Zhang ZF, Perryman B, Roman D, Strauss AW.#TITLE:Isolation and characterization of the gene and cDNA encoding human mitochondrial creatine kinase.#JOURNAL:J Biol Chem. #YEAR:1989#PUBMED:2914937#;Klein SC, Haas RC, Perryman MB, Billadello JJ, Strauss AW.#TITLE:Regulatory element analysis and structural characterization of the human sarcomeric mitochondrial creatine kinase gen…
387	CKc	ATP Creatine kinase (c)	Urea cycle/amino group metabolism	2.7.3.2	( 1152.1 ) or ( 1158.1 ) and ( 1152.1 ) or ( 1158.1 )	-1000	1000	4	kegg C02305 MJC SAB c	Villarreal-Levy G, Ma TS, Kerner SA, Roberts R, Perryman MB#TITLE:Human creatine kinase: isolation and sequence analysis of cDNA clones for the B subunit, development of subunit specific probes and determination of gene copy number#JOURNAL:Biochem Biophys Res Commun#YEAR:1987#PUBMED:3034271#;Kaye FJ, McBride OW, Battey JF, Gazdar AF, Sausville EA#TITLE:Human creatine kinase-B complementary DNA. N…
388	CLFORtex2	chloride transport via formate countertransport (2:1)	Transport, Extracellular		( 65010.1 ) or ( 65010.3 ) or ( 65010.2 )	0	1000	2	SAB	Mount DB, Romero MF#TITLE:The SLC26 gene family of multifunctional anion exchangers#JOURNAL:Pflugers Arch#YEAR:2004#PUBMED:12759755#
389	CLHCO3tex2	chloride transport via bicarbonate countertransport (2:1)	Transport, Extracellular		( 65010.1 ) or ( 65010.3 ) or ( 65010.2 )	0	1000	2	SAB	Mount DB, Romero MF#TITLE:The SLC26 gene family of multifunctional anion exchangers#JOURNAL:Pflugers Arch#YEAR:2004#PUBMED:12759755#
390	CLHCOtex	chloride transport via bicarbonate countertransport	Transport, Extracellular		( 116369.1 ) or ( 5172.1 ) or ( 116369.2 ) or ( 115019.2 ) or ( 1811.1 ) or ( 115019.1 ) or ( 1836.1 ) or ( 115111.1 ) or ( 115111.2 )	0	1000	2	SAB	Mount DB, Romero MF#TITLE:The SLC26 gene family of multifunctional anion exchangers#JOURNAL:Pflugers Arch#YEAR:2004#PUBMED:12759755#
391	CLOHtex2	chloride transport via hydroxide countertransport (2:1)	Transport, Extracellular		( 65010.1 ) or ( 65010.3 ) or ( 65010.2 )	0	1000	2	SAB	Mount DB, Romero MF#TITLE:The SLC26 gene family of multifunctional anion exchangers#JOURNAL:Pflugers Arch#YEAR:2004#PUBMED:12759755#
392	CLOXAtex2	chloride transport via oxalate countertransport (2:1)	Transport, Extracellular		( 65010.1 ) or ( 65010.3 ) or ( 65010.2 )	0	1000	2	SAB	Mount DB, Romero MF#TITLE:The SLC26 gene family of multifunctional anion exchangers#JOURNAL:Pflugers Arch#YEAR:2004#PUBMED:12759755#
393	CLS_hs	cardiolipin synthase (homo sapiens)	Glycerophospholipid Metabolism		( 54675.1 )	0	1000	0	NJ	Schlame M, Rua D, Greenberg ML.#TITLE:The biosynthesis and functional role of cardiolipin.#JOURNAL:Prog Lipid Res.#YEAR:2000#PUBMED:10799718#
394	CMPACNAtg	CMP-Sia Golgi transport via CMP antiport	Transport, Golgi Apparatus		( 10559.1 )	-1000	1000	4	NCD	Ishida N, Ito M, Yoshioka S, Sun-Wada GH, Kawakita M#TITLE:Functional expression of human golgi CMP-sialic acid transporter in the Golgi complex of a transporter-deficient Chinese hamster ovary cell mutant#JOURNAL:J Biochem (Tokyo)#YEAR:1998#PUBMED:9644260#;Ishida N, Miura N, Yoshioka S, Kawakita M#TITLE:Molecular cloning and characterization of a novel isoform of the human UDP-galactose transpor…
395	CMPACNAtn	CMP-Sia nuclear export	Transport, Nuclear			0	1000	2	NCD	Varki, Cummings, Esko, Freeze, Hart, Marth#TITLE:Essentials of Glycobiology#YEAR:1999#
396	CMPSAS	CMP sialic acid synthase	Aminosugar Metabolism	2.7.7.43	( 55907.1 )	0	1000	2	NCD	Varki, Cummings, Esko, Freeze, Hart, Marth#TITLE:Essentials of Glycobiology#YEAR:1999#;Devlin, TM#TITLE:Textbook of Biochemistry with Clinical Correlations#YEAR:2001#;Orten JM, Neuhaus OW.#TITLE:Human Biochemistry#YEAR:1975#;Munster AK, Eckhardt M, Potvin B, Muhlenhoff M, Stanley P, Gerardy-Schahn R#TITLE:Mammalian cytidine 5&apos;-monophosphate N-acetylneuraminic acid synthetase: a nuclear prote…
397	CMPSASn	CMP sialic acid synthase, nuclear	Aminosugar Metabolism	2.7.7.43	( 55907.1 )	0	1000	2	NCD	Varki, Cummings, Esko, Freeze, Hart, Marth#TITLE:Essentials of Glycobiology#YEAR:1999#;Devlin, TM#TITLE:Textbook of Biochemistry with Clinical Correlations#YEAR:2001#;Orten JM, Neuhaus OW.#TITLE:Human Biochemistry#YEAR:1975#;Munster AK, Eckhardt M, Potvin B, Muhlenhoff M, Stanley P, Gerardy-Schahn R#TITLE:Mammalian cytidine 5&apos;-monophosphate N-acetylneuraminic acid synthetase: a nuclear prote…
398	CO2ter	CO2 endoplasmic reticular transport via diffusion	Transport, Endoplasmic Reticular			-1000	1000	1	NCD
399	CO2tg	CO2 Golgi transport	Transport, Golgi Apparatus			-1000	1000	1	NCD
400	CO2tm	CO2 transport (diffusion), mitochondrial	Transport, Mitochondrial			0	0	4	IF	Balboni E, Lehninger AL.#TITLE:Entry and exit pathways of CO2 in rat liver mitochondria respiring in a bicarbonate buffer system.#JOURNAL:J Biol Chem#YEAR:1968#PUBMED:3081508#
401	CO2tp	CO2 peroxisomal transport	Transport, Peroxisomal			-1000	1000	1	NCD
402	COAtl	CoA transport in lysosome via diffusion	Transport, Lysosomal			-1000	1000	2	IT	Bender DA#TITLE:Nutritional Biochemistry of the Vitamins#YEAR:2003#;Seetharam B, Alpers DH.#TITLE:Absorption and transport of cobalamin (vitamin B12).#JOURNAL:Annu Rev Nutr.#YEAR:1982#PUBMED:6313022#
403	COAtm	CoA transporter	Transport, Mitochondrial		( 8034.1 )	-1000	1000	4	TV May not a &quot;real&quot; transporter, use in heart mitochondria model only	Palmieri, F.#TITLE: The mitochondrial transporter family (SLC25): physiological and pathological implications.#JOURNAL: Pflugers Archive#YEAR:2004#PUBMED:14598172#
404	COAtn	coenzyme A transport, nuclear	Transport, Nuclear			-1000	1000	2	NCD
405	COAtp	coenzyme A transport, peroxisomal	Transport, Peroxisomal			-1000	1000	1	NCD
406	COAtr	COA transporter, endoplasmic reticulum	Transport, Endoplasmic Reticular			-1000	1000	1	diffusion NJ
407	COUMARINte	xenobiotic transport	Transport, Extracellular			-1000	1000	2	unknown mechanism, related cyp P450 metabolism reactions NJ
408	COt	CO transporter via diffusion	Transport, Extracellular			-1000	1000	2	TDV
409	CPPPGO	coproporphyrinogen oxidase (O2 required)	Heme Biosynthesis	1.3.3.3	( 1371.1 )	0	1000	2	JLR	Kohno H, Furukawa T, Yoshinaga T, Tokunaga R, Taketani S.#TITLE:Coproporphyrinogen oxidase. Purification, molecular cloning, and induction of mRNA during erythroid differentiation.#JOURNAL:J Biol Chem#YEAR:1995#PUBMED:8407975#
410	CREATt4(2)r	Creatine transport (sodium symport) (2:1)	Transport, Extracellular		( 6535.1 ) or ( 6537.1 )	-1000	1000	4	SAB	Chen NH, Reith ME, Quick MW#TITLE:Synaptic uptake and beyond: the sodium- and chloride-dependent neurotransmitter transporter family SLC6#JOURNAL:Pflugers Arch#YEAR:2004#PUBMED:12719981#
411	CREATtmdiffir	Creatine transport to/from mitochondria via diffusion	Urea cycle/amino group metabolism			0	1000	2	SAB	Bessman SP, Carpenter CL#TITLE:The creatine-creatine phosphate energy shuttle#JOURNAL:Annu Rev Biochem#YEAR:1985#PUBMED:3896131#;Speer O, Neukomm LJ, Murphy RM, Zanolla E, Schlattner U, Henry H, Snow RJ, Wallimann T#TITLE:Creatine transporters: a reappraisal#JOURNAL:Mol Cell Biochem#YEAR:2004#PUBMED:14977199#
412	CRMPte	crmp hs transport	Transport, Extracellular			-1000	1000	2	unknown mechanism for transport, may be vesicular/caveolar/other ... intracellular transport and extracellular export mechanisms must exist - see for example: PMID: 15585321 NJ	Baumruker T, Bornancin F, Billich A.#TITLE:The role of sphingosine and ceramide kinases in inflammatory responses.#JOURNAL:Immunol Lett.#YEAR:2005#PUBMED:15585321#
413	CRNCAR3tp	carnitine-propcarnitine carrier, peroxisomal	Transport, Peroxisomal			0	1000	0	copied from NCD&apos;s CRNCARtp NJ
414	CRNCARtp	carnitine-acetylcarnitine carrier, peroxisomal	Transport, Peroxisomal			0	1000	0	NCD
415	CRNt	L-carnitine reversible transport	Transport, Extracellular		( 6584.1 )	-1000	1000	4	NCD	Koepsell H, Endou H#TITLE:The SLC22 drug transporter family#JOURNAL:Pflugers Arch#YEAR:2004#PUBMED:12883891#;Verhaagh S, Schweifer N, Barlow DP, Zwart R.#TITLE:Cloning of the mouse and human solute carrier 22a3 (Slc22a3/SLC22A3) identifies a conserved cluster of three organic cation transporters on mouse chromosome 17 and human 6q26-q27.#JOURNAL:Genomics#YEAR:1999#PUBMED:9933568#;Koepsell H, Schm…
416	CRNtHa	L-carnitine outward transport (H+ antiport)	Transport, Extracellular		( 6583.1 )	0	1000	4	SAB H+ stoichiometry unknown	Koepsell H, Endou H#TITLE:The SLC22 drug transporter family#JOURNAL:Pflugers Arch#YEAR:2004#PUBMED:12883891#
417	CRNtim	L-carnitine transport out of mitochondria via diffusion	Transport, Mitochondrial		( 788.1 )	0	1000	4	NCD	Palmieri, F.#TITLE: The mitochondrial transporter family (SLC25): physiological and pathological implications.#JOURNAL: Pflugers Archive#YEAR:2004#PUBMED:14598172#
418	CSAPASEly	chondroitin sulfate A proteoglycan protease, lysosome (endosome)	Chondroitin sulfate degradation			0	1000	1	Note that this reaction occurs in the endosome during endocytosis, but has been compartmentalized as lysosomal. NCD	Winchester BG#TITLE:Lysosomal metabolism of glycoconjugates#JOURNAL:Subcell Biochem#YEAR:1996#PUBMED:8993162#
419	CSBPASEly	chondroitin sulfate B proteoglycan protease, lysosome (endosome)	Chondroitin sulfate degradation			0	1000	1	Note that this reaction occurs in the endosome during endocytosis, but has been compartmentalized as lysosomal. NCD	Winchester BG#TITLE:Lysosomal metabolism of glycoconjugates#JOURNAL:Subcell Biochem#YEAR:1996#PUBMED:8993162#
420	CSCPASEly	chondroitin sulfate C proteoglycan protease, lysosome (endosome)	Chondroitin sulfate degradation			0	1000	1	Note that this reaction occurs in the endosome during endocytosis, but has been compartmentalized as lysosomal. NCD	Winchester BG#TITLE:Lysosomal metabolism of glycoconjugates#JOURNAL:Subcell Biochem#YEAR:1996#PUBMED:8993162#
421	CSDPASEly	chondroitin sulfate D proteoglycan protease, lysosome (endosome)	Chondroitin sulfate degradation			0	1000	1	Note that this reaction occurs in the endosome during endocytosis, but has been compartmentalized as lysosomal. NCD	Winchester BG#TITLE:Lysosomal metabolism of glycoconjugates#JOURNAL:Subcell Biochem#YEAR:1996#PUBMED:8993162#
422	CSEPASEly	chondroitin sulfate E proteoglycan protease, lysosome (endosome)	Chondroitin sulfate degradation			0	1000	1	Note that this reaction occurs in the endosome during endocytosis, but has been compartmentalized as lysosomal. NCD	Winchester BG#TITLE:Lysosomal metabolism of glycoconjugates#JOURNAL:Subcell Biochem#YEAR:1996#PUBMED:8993162#
423	CSNAT2m	carnitine O-aceyltransferase, mitochondrial	Carnitine shuttle	2.3.1.7	( 1384.1 )	-1000	1000	4	TDV	Lysiak W, Toth PP, Suelter CH, Bieber LL.#TITLE:Quantitation of the efflux of acylcarnitines from rat heart, brain, and liver mitochondria.#JOURNAL:J Biol Chem#YEAR:1986#PUBMED:3759988#;Ramsay, Gandour, van der Leij#TITLE:Molecular enzymology of carnitine transfer and transport#JOURNAL:Biochim Biophys Acta#YEAR:2001#PUBMED:11257506#
424	CSNAT3x	carnitine O-aceyltransferase, peroxisomal	Carnitine shuttle	2.3.1.7	( 1384.2 )	-1000	1000	4	NJ	Corti O, Finocchiaro G, Rossi E, Zuffardi O, DiDonato S.#TITLE:Molecular cloning of cDNAs encoding human carnitine acetyltransferase and mapping of the corresponding gene to chromosome 9q34.1.#JOURNAL:Genomics#YEAR:1994#PUBMED:7829107#;Jakobs BS, Wanders RJ.#TITLE:Fatty acid beta-oxidation in peroxisomes and mitochondria: the first, unequivocal evidence for the involvement of carnitine in shuttli…
425	CSNATm	carnitine O-aceyltransferase, mitochondrial	Fatty Acid Metabolism	2.3.1.7	( 1384.1 )	0	100	4	TDV	Lysiak W, Toth PP, Suelter CH, Bieber LL.#TITLE:Quantitation of the efflux of acylcarnitines from rat heart, brain, and liver mitochondria.#JOURNAL:J Biol Chem#YEAR:1986#PUBMED:3759988#
426	CSNATp	carnitine O-acetyltransferase, reverse direction, peroxisomal	Fatty Acid Metabolism	2.3.1.7	( 1384.2 )	-1000	1000	2	NCD	Corti O, Finocchiaro G, Rossi E, Zuffardi O, DiDonato S.#TITLE:Molecular cloning of cDNAs encoding human carnitine acetyltransferase and mapping of the corresponding gene to chromosome 9q34.1.#JOURNAL:Genomics#YEAR:1994#PUBMED:7829107#
427	CSND	Cytosine deaminase	Pyrimidine Catabolism	3.5.4.1		0	1000	2	JLR	Devlin, TM#TITLE:Textbook of Biochemistry with Clinical Correlations#YEAR:2001#;Orten JM, Neuhaus OW.#TITLE:Human Biochemistry#YEAR:1975#
428	CSNt	cytosine transport via facilated diffusion	Transport, Extracellular		( 3177.1 )	-1000	1000	4	IT	Baldwin SA, Beal PR, Yao SY, King AE, Cass CE, Young JD.#TITLE:The equilibrative nucleoside transporter family, SLC29.#JOURNAL:Pflugers Arch. #YEAR:2004#PUBMED:12838422#;Yao SY, Ng AM, Vickers MF, Sundaram M, Cass CE, Baldwin SA, Young JD.#TITLE:Functional and molecular characterization of nucleobase transport by recombinant human and rat equilibrative nucleoside transporters 1 and 2.#JOURNAL:J B…
429	CSPG_At	chondroitin sulfate A transport, golgi to extracellular	Transport, Extracellular			0	1000	2	NCD	Varki, Cummings, Esko, Freeze, Hart, Marth#TITLE:Essentials of Glycobiology#YEAR:1999#
430	CSPG_Atly	chondroitin sulfate A transport, extracellular to lysosome	Transport, Lysosomal			0	1000	2	NCD	Varki, Cummings, Esko, Freeze, Hart, Marth#TITLE:Essentials of Glycobiology#YEAR:1999#
431	CSPG_Bt	chondroitin sulfate B transport, golgi to extracellular	Transport, Extracellular			0	1000	2	NCD	Varki, Cummings, Esko, Freeze, Hart, Marth#TITLE:Essentials of Glycobiology#YEAR:1999#
432	CSPG_Btly	chondroitin sulfate B transport, extracellular to lysosome	Transport, Lysosomal			0	1000	2	NCD	Varki, Cummings, Esko, Freeze, Hart, Marth#TITLE:Essentials of Glycobiology#YEAR:1999#
433	CSPG_Ct	chondroitin sulfate C transport, golgi to extracellular	Transport, Extracellular			0	1000	2	NCD	Varki, Cummings, Esko, Freeze, Hart, Marth#TITLE:Essentials of Glycobiology#YEAR:1999#
434	CSPG_Ctly	chondroitin sulfate C transport, extracellular to lysosome	Transport, Lysosomal			0	1000	2	NCD	Varki, Cummings, Esko, Freeze, Hart, Marth#TITLE:Essentials of Glycobiology#YEAR:1999#
435	CSPG_Dt	chondroitin sulfate D transport, golgi to extracellular	Transport, Extracellular			0	1000	2	NCD	Varki, Cummings, Esko, Freeze, Hart, Marth#TITLE:Essentials of Glycobiology#YEAR:1999#
436	CSPG_Dtly	chondroitin sulfate D transport, extracellular to lysosome	Transport, Lysosomal			0	1000	2	NCD	Varki, Cummings, Esko, Freeze, Hart, Marth#TITLE:Essentials of Glycobiology#YEAR:1999#
437	CSPG_Et	chondroitin sulfate E transport, golgi to extracellular	Transport, Extracellular			0	1000	2	NCD	Varki, Cummings, Esko, Freeze, Hart, Marth#TITLE:Essentials of Glycobiology#YEAR:1999#
438	CSPG_Etly	chondroitin sulfate E transport, extracellular to lysosome	Transport, Lysosomal			0	1000	2	NCD	Varki, Cummings, Esko, Freeze, Hart, Marth#TITLE:Essentials of Glycobiology#YEAR:1999#
439	CSm	citrate synthase	Citric Acid Cycle		( 1431.1 ) or ( 1431.2 )	100	500	0	IF old EC number (4.1.3.7) is obsolete -- transferred to 2.3.3.1 NCD	Orten JM, Neuhaus OW.#TITLE:Human Biochemistry#YEAR:1975#
440	CTPS1	CTP synthase (NH3)	Nucleotides	6.3.4.2	( 1503.1 )	0	1000	2	LOCUS:_1503#TRANSCRIPT:1#ABBREVIATION:CTPS#ECNUMBERS:6.3.4.2#	Takahashi E, Yamauchi M, Tsuji H, Hitomi A, Meuth M, Hori T.#TITLE:Chromosome mapping of the human cytidine-5&apos;-triphosphate synthetase (CTPS) gene to band 1p34.1-p34.3 by fluorescence in situ hybridization.#JOURNAL:Hum Genet.#YEAR:1991#PUBMED:1959918#
441	CTPS2	CTP synthase (glutamine)	Pyrimidine Biosynthesis	6.3.4.2	( 56474.1 ) or ( 56474.2 )	0	1000	4	LOCUS:_56474#TRANSCRIPT:1#ABBREVIATION:CTPS2#	Orten JM, Neuhaus OW.#TITLE:Human Biochemistry#YEAR:1975#;van Kuilenburg AB, Meinsma R, Vreken P, Waterham HR, van Gennip AH. #TITLE:Identification of a cDNA encoding an isoform of human CTP synthetase.#JOURNAL:Biochim Biophys Acta.#YEAR:2000#PUBMED:10899599#
442	CTPtn	CTP diffusion in nucleus	Transport, Nuclear			-1000	1000	2	IT
443	CYANSTm	Cyanide sulfurtransferase, mitochondrial	Cysteine Metabolism	2.8.1.1	( 7263.1 )	0	1000	4	MM	Horowitz PM, Butler M, McClure GD Jr.#TITLE:Reducing sugars can induce the oxidative inactivation of rhodanese.#YEAR:1992#PUBMED:1429701#;Aita N, Ishii K, Akamatsu Y, Ogasawara Y, Tanabe S.#TITLE:Cloning and expression of human liver rhodanese cDNA.#YEAR:1997#PUBMED:9070219#
444	CYANt	Cyanide transport via diffusion (extracellular to cytosol)	Transport, Extracellular			-1000	1000	2	assumed to be readily diffusible MM
445	CYANtm	Cyanide transport via diffusion (mitochondrial)	Transport, Mitochondrial			-1000	1000	0	assumed to be readily diffusible MM
446	CYOOm3	cytochrome c oxidase, mitochondrial Complex IV	Oxidative Phosphorylation	1.9.3.1	( 1351.1 ) and ( 1347.1 ) and ( 1329.1 ) and ( 1327.1 ) and ( 341947.1 ) and ( 9167.1 ) and ( 1350.1 ) and ( 4512.1 ) and ( 1349.1 ) and ( 1339.1 ) and ( 1345.1 ) and ( 4513.1 ) and ( 9377.1 ) and ( 125965.1 ) and ( 4514.1 ) and ( 170712.1 ) and ( 1346.1 ) and ( 1340.1 ) and ( 84701.1 ) and ( 1337.1 )	0	1000	4	TV, 2% O2 lost in O2-
447	CYOR_u10m	ubiquinol-6 cytochrome c reductase, Complex III	Oxidative Phosphorylation	1.10.2.2	( 8876.1 ) and ( 8875.2 ) and ( 55350.3 ) or ( 8876.1 ) and ( 8875.2 ) and ( 55350.2 ) or ( 8876.1 ) and ( 8875.1 ) and ( 55350.1 ) or ( 8876.1 ) and ( 55350.2 ) and ( 8875.1 ) or ( 8875.2 ) and ( 8876.1 ) and ( 55350.1 ) or ( 8876.1 ) and ( 55350.3 ) and ( 8875.1 ) or ( AA081045.1 ) or ( AI620219.1 ) or ( 219.1 ) or ( 217.1 ) or ( 224.1 ) or ( 501.1 ) or ( 223.1 ) or ( AU149534.1 ) or ( T83654.1…	0	1000	4	TV
448	CYSAMO	Cysteamine oxygenase	Taurine and hypotaurine metabolism			0	1000	2	IT	Bender DA#TITLE:Nutritional Biochemistry of the Vitamins#YEAR:2003#
449	CYSGLTH	Glutathione:cystine oxidoreductase	Cysteine Metabolism	1.8.4.4		-1000	1000	4	reaction according to KEGG MM	Stipanuk MH#TITLE:Sulfur amino acid metabolism: pathways for production and removal of homocysteine and cysteine#JOURNAL:Annu Rev Nutr#YEAR:2004#PUBMED:15189131#;Oshima RG, Rhead WJ, Thoene JG, Schneider JA.#TITLE:Cystine metabolism in human fibroblasts. Comparison of normal, cystinotic, and gamma-glutamylcysteine synethetase-deficient cells.#YEAR:1976#PUBMED:932033#
450	CYSO	cysteine oxidase	Taurine and hypotaurine metabolism	1.13.11.20	( 1036.1 )	0	1000	4	IT	Millard J, Parsons RB, Waring RH, Williams AC, Ramsden DB#TITLE:Expression of cysteine dioxygenase (EC 1.13.11.20) and sulfite oxidase in the human lung: a potential role for sulfate production in the protection from airborne xenobiotica#JOURNAL:Mol Pathol#YEAR:2003#PUBMED:14514920#
451	CYSTA	cysteine transaminase	Cysteine Metabolism	2.6.1.3	( 2805.1 )	-1000	1000	2	MM	Stipanuk MH#TITLE:Sulfur amino acid metabolism: pathways for production and removal of homocysteine and cysteine#JOURNAL:Annu Rev Nutr#YEAR:2004#PUBMED:15189131#;Akagi R.#TITLE:Purification and characterization of cysteine aminotransferase from rat liver cytosol. #YEAR:1982#PUBMED:7113743#
452	CYSTGL	cystathionine g-lyase	Cysteine Metabolism	4.4.1.1	( 1491.1 ) or ( 1491.2 )	0	1000	4	NCD	Stipanuk MH#TITLE:Sulfur amino acid metabolism: pathways for production and removal of homocysteine and cysteine#JOURNAL:Annu Rev Nutr#YEAR:2004#PUBMED:15189131#;Levonen AL, Lapatto R, Saksela M, Raivio KO.#TITLE:Human cystathionine gamma-lyase: developmental and in vitro expression of two isoforms.#YEAR:2000#PUBMED:10727430#
453	CYSTS	cystathionine beta-synthase	Methionine and cysteine metabolism	4.2.1.22	( 875.1 )	0	1000	4	NCD	Kraus JP, Oliveriusova J, Sokolova J, Kraus E, Vlcek C, de Franchis R#TITLE:The human cystathionine beta-synthase (CBS) gene: complete sequence, alternative splicing, and polymorphisms.#YEAR:1998#PUBMED:9790750#;Kraus J, Packman S, Fowler B, Rosenberg LE.#TITLE:Purification and properties of cystathionine beta-synthase from human liver. Evidence for identical subunits.#YEAR:1978#PUBMED:681363#
454	CYSTSERex	L-cystine/glycine exchanger (cystine in)	Transport, Extracellular		( 6519.1 and 11136.1 )	0	1000	4	SAB see PMID 14770310
455	CYTDK1	cytidine kinase (ATP)	Nucleotides		( 7371.1 ) or ( 83549.1 )	0	1000	2	LOCUS:_7371#TRANSCRIPT:1#ABBREVIATION:UCK2#ECNUMBERS:2.7.4.*#	Kashuba E, Kashuba V, Sandalova T, Klein G, Szekely L#TITLE:Epstein-Barr virus encoded nuclear protein EBNA-3 binds a novel human uridine kinase/uracil phosphoribosyltransferase. #JOURNAL:BMC Cell Biol.#YEAR:2002#PUBMED:12199906#;Ozaki K, Kuroki T, Hayashi S, Nakamura Y.#TITLE:Isolation of three testis-specific genes (TSA303, TSA806, TSA903) by a differential mRNA display method. #JOURNAL:Genomic…
456	CYTDK2m	cytidine kinase (ATP), mitochondrial	Nucleotides			0	1000	1	IT
457	CYTDt	cytidine facilated transport in cytosol	Transport, Extracellular		( 3177.1 ) or ( 2030.1 )	-1000	1000	4	IT	Baldwin SA, Beal PR, Yao SY, King AE, Cass CE, Young JD.#TITLE:The equilibrative nucleoside transporter family, SLC29.#JOURNAL:Pflugers Arch. #YEAR:2004#PUBMED:12838422#;Ward JL, Sherali A, Mo ZP, Tse CM.#TITLE:Kinetic and pharmacological properties of cloned human equilibrative nucleoside transporters, ENT1 and ENT2, stably expressed in nucleoside transporter-deficient PK15 cells.#JOURNAL:J Biol…
458	CYTDt4	cytidine transport in via sodium symport	Transport, Extracellular		( 9154.1 ) or ( 9154.2 ) or ( 64078.1 )	0	1000	4	SAB	Gray JH, Owen RP, Giacomini KM.#TITLE:The concentrative nucleoside transporter family, SLC28. #YEAR:2004#PUBMED:12856181#
459	CYTDtm	cytidine facilated transport in mitochondria	Transport, Mitochondrial		( 2030.1 )	-1000	1000	4	IT	Lai Y, Tse CM, Unadkat JD.#TITLE:Mitochondrial expression of the human equilibrative nucleoside transporter 1 (hENT1) results in enhanced mitochondrial toxicity of antiviral drugs.#JOURNAL:J Biol Chem. #YEAR:2004#PUBMED:14607828#;Baldwin SA, Beal PR, Yao SY, King AE, Cass CE, Young JD.#TITLE:The equilibrative nucleoside transporter family, SLC29.#JOURNAL:Pflugers Arch. #YEAR:2004#PUBMED:12838422#…
460	CYTK11n	cytidylate kinase (dCMP,dGTP),nuclear	Nucleotides	2.7.4.14	( 51727.1 )	-1000	1000	4	LOCUS:_51727#TRANSCRIPT:1#ABBREVIATION:UMP-CMPK#ECNUMBERS:2.7.4.14#	Van Rompay AR, Johansson M, Karlsson A.#TITLE:Phosphorylation of deoxycytidine analog monophosphates by UMP-CMP kinase: molecular characterization of the human enzyme. #JOURNAL:Mol Pharmacol. #YEAR:1999#PUBMED:10462544#;Liou JY, Dutschman GE, Lam W, Jiang Z, Cheng YC.#TITLE:Characterization of human UMP/CMP kinase and its phosphorylation of D- and L-form deoxycytidine analogue monophosphates.#JOU…
461	CYTK12	cytidylate kinase (dCMP,dCTP)	Nucleotides	2.7.4.14	( 51727.1 )	0	0	4	LOCUS:_51727#TRANSCRIPT:1#ABBREVIATION:UMP-CMPK#ECNUMBERS:2.7.4.14#	Van Rompay AR, Johansson M, Karlsson A.#TITLE:Phosphorylation of deoxycytidine analog monophosphates by UMP-CMP kinase: molecular characterization of the human enzyme. #JOURNAL:Mol Pharmacol. #YEAR:1999#PUBMED:10462544#;Liou JY, Dutschman GE, Lam W, Jiang Z, Cheng YC.#TITLE:Characterization of human UMP/CMP kinase and its phosphorylation of D- and L-form deoxycytidine analogue monophosphates.#JOU…
462	CYTK13n	cytidylate kinase (dCMP,dATP),nuclear	Nucleotides	2.7.4.14	( 51727.1 )	-1000	1000	4	LOCUS:_51727#TRANSCRIPT:1#ABBREVIATION:UMP-CMPK#ECNUMBERS:2.7.4.14#	Van Rompay AR, Johansson M, Karlsson A.#TITLE:Phosphorylation of deoxycytidine analog monophosphates by UMP-CMP kinase: molecular characterization of the human enzyme. #JOURNAL:Mol Pharmacol. #YEAR:1999#PUBMED:10462544#;Liou JY, Dutschman GE, Lam W, Jiang Z, Cheng YC.#TITLE:Characterization of human UMP/CMP kinase and its phosphorylation of D- and L-form deoxycytidine analogue monophosphates.#JOU…
463	CYTK1m	cytidylate kinase (CMP),mitochondrial	Nucleotides	2.7.4.14		-1000	1000	1	none
464	CYTK2n	cytidylate kinase (dCMP),nuclear	Nucleotides	2.7.4.14	( 51727.1 )	-1000	1000	4	LOCUS:_51727#TRANSCRIPT:1#ABBREVIATION:UMP-CMPK#ECNUMBERS:2.7.4.14#	Van Rompay AR, Johansson M, Karlsson A.#TITLE:Phosphorylation of deoxycytidine analog monophosphates by UMP-CMP kinase: molecular characterization of the human enzyme. #JOURNAL:Mol Pharmacol. #YEAR:1999#PUBMED:10462544#;Liou JY, Dutschman GE, Lam W, Jiang Z, Cheng YC.#TITLE:Characterization of human UMP/CMP kinase and its phosphorylation of D- and L-form deoxycytidine analogue monophosphates.#JOU…
465	CYTK3n	cytidylate kinase (dCMP,CTP),nuclear	Nucleotides	2.7.4.14	( 51727.1 )	-1000	1000	4	LOCUS:_51727#TRANSCRIPT:1#ABBREVIATION:UMP-CMPK#ECNUMBERS:2.7.4.14#	Van Rompay AR, Johansson M, Karlsson A.#TITLE:Phosphorylation of deoxycytidine analog monophosphates by UMP-CMP kinase: molecular characterization of the human enzyme. #JOURNAL:Mol Pharmacol. #YEAR:1999#PUBMED:10462544#;Liou JY, Dutschman GE, Lam W, Jiang Z, Cheng YC.#TITLE:Characterization of human UMP/CMP kinase and its phosphorylation of D- and L-form deoxycytidine analogue monophosphates.#JOU…
466	CYTK4n	cytidylate kinase (dCMP,GTP),nuclear	Nucleotides	2.7.4.14	( 51727.1 )	-1000	1000	4	LOCUS:_51727#TRANSCRIPT:1#ABBREVIATION:UMP-CMPK#ECNUMBERS:2.7.4.14#	Van Rompay AR, Johansson M, Karlsson A.#TITLE:Phosphorylation of deoxycytidine analog monophosphates by UMP-CMP kinase: molecular characterization of the human enzyme. #JOURNAL:Mol Pharmacol. #YEAR:1999#PUBMED:10462544#;Liou JY, Dutschman GE, Lam W, Jiang Z, Cheng YC.#TITLE:Characterization of human UMP/CMP kinase and its phosphorylation of D- and L-form deoxycytidine analogue monophosphates.#JOU…
467	CYTK9	cytidylate kinase (CMP,dCTP)	Nucleotides	2.7.4.14	( 51727.1 )	0	0	4	LOCUS:_51727#TRANSCRIPT:1#ABBREVIATION:UMP-CMPK#ECNUMBERS:2.7.4.14#	Van Rompay AR, Johansson M, Karlsson A.#TITLE:Phosphorylation of deoxycytidine analog monophosphates by UMP-CMP kinase: molecular characterization of the human enzyme. #JOURNAL:Mol Pharmacol. #YEAR:1999#PUBMED:10462544#;Liou JY, Dutschman GE, Lam W, Jiang Z, Cheng YC.#TITLE:Characterization of human UMP/CMP kinase and its phosphorylation of D- and L-form deoxycytidine analogue monophosphates.#JOU…
468	DADA	Deoxyadenosine deaminase	Nucleotides		( 100.1 )	0	0	4	JLR	Gonzalez-Gronow M, Hershfield MS, Arredondo-Vega FX, Pizzo SV.#TITLE:Cell surface adenosine deaminase binds and stimulates plasminogen activation on 1-LN human prostate cancer cells.#JOURNAL:J Biol Chem#YEAR:2004#PUBMED:15016824#;Iwaki-Egawa S, Watanabe Y.#TITLE:Characterization and purification of adenosine deaminase 1 from human and chicken liver.#JOURNAL:Comp Biochem Physiol B Biochem Mol Biol…
469	DADAe	Deoxyadenosine deaminase, extracellular	Nucleotides		( 100.1 )	0	0	4	adenosine deaminase has been found on cell surface in human (Gonzales-Gronow et al, JBC, 2004,279,20993-20998). IT	Gonzalez-Gronow M, Hershfield MS, Arredondo-Vega FX, Pizzo SV.#TITLE:Cell surface adenosine deaminase binds and stimulates plasminogen activation on 1-LN human prostate cancer cells.#JOURNAL:J Biol Chem#YEAR:2004#PUBMED:15016824#;Iwaki-Egawa S, Watanabe Y.#TITLE:Characterization and purification of adenosine deaminase 1 from human and chicken liver.#JOURNAL:Comp Biochem Physiol B Biochem Mol Biol…
470	DAGK_hs	Diacylglycerol phosphate kinase (homo sapiens)	Glycerophospholipid Metabolism	2.7.1.107	( 9162.1 ) or ( 1607.1 ) or ( 8525.2 ) or ( 160851.1 ) or ( 1608.1 ) or ( 1607.2 ) or ( 8525.1 ) or ( 8527.1 ) or ( 1606.1 ) or ( 160851.2 ) or ( 8526.1 ) or ( 8525.3 ) or ( 1607.1 ) or ( 8527.2 ) or ( 1609.1 )	-1000	1000	4	NJ	Voet D, Voet JG#TITLE:Biochemistry#YEAR:1995#;Tang W, Bunting M, Zimmerman GA, McIntyre TM, Prescott SM#TITLE:Molecular cloning of a novel human diacylglycerol kinase highly selective for arachidonate-containing substrates#JOURNAL:Journal of Biological Chemistry#YEAR:1996#
471	DAGKn_hs	Diacylglycerol phosphate kinase (homo sapiens)	Glycerophospholipid Metabolism	2.7.1.107	( 8525.1 ) or ( 9162.1 )	-1000	1000	4	NJ	Voet D, Voet JG#TITLE:Biochemistry#YEAR:1995#;Tang W, Bunting M, Zimmerman GA, McIntyre TM, Prescott SM#TITLE:Molecular cloning of a novel human diacylglycerol kinase highly selective for arachidonate-containing substrates#JOURNAL:Journal of Biological Chemistry#YEAR:1996#
472	DAG_HSter	diacylglycerol ER export	Transport, Endoplasmic Reticular			0	1000	1	NCD
473	DALAOXx	D-Alanine Oxidase (x)	D-alanine metabolism	1.4.3.3	( 1610.1 )	0	1000	4	SAB	Vanoni MA, Cosma A, Mazzeo D, Mattevi A, Todone F, Curti B#TITLE:Limited proteolysis and X-ray crystallography reveal the origin of substrate specificity and of the rate-limiting product release during oxidation of D-amino acids catalyzed by mammalian D-amino acid oxidase#JOURNAL:Biochemistry#YEAR:1997#PUBMED:9153402#
474	DALAt2r	D-alanine transport via proton symport	Transport, Extracellular		( 206358.1 )	-1000	1000	2	JLR	Sagne C, Agulhon C, Ravassard P, Darmon M, Hamon M, El Mestikawy S, Gasnier B, Giros B#TITLE:Identification and characterization of a lysosomal transporter for small neutral amino acids#JOURNAL:Proc Natl Acad Sci U S A#YEAR:2001#PUBMED:11390972#;Boll M, Foltz M, Rubio-Aliaga I, Kottra G, Daniel H#TITLE:Functional characterization of two novel mammalian electrogenic proton-dependent amino acid cot…
475	DALAxt	D-Alanine transport to perixosome	D-alanine metabolism			0	1000	1	SAB
476	DASCBR	dehydroascorbate reductase	Ascorbate and Aldarate Metabolism	1.6.5.4	( 2745.1 ) or ( 51022.2 ) or ( 51022.1 )	0	1000	4	NCD	Lundberg M, Johansson C, Chandra J, Enoksson M, Jacobsson G, Ljung J, Johansson M, Holmgren A.#TITLE:Cloning and expression of a novel human glutaredoxin (Grx2) with mitochondrial and nuclear isoforms#JOURNAL:J Biol Chem#YEAR:2001#PUBMED:11297543#
477	DATPtn	dATP diffusion in nucleus	Transport, Nuclear			-1000	1000	2	IT
478	DCK1n	Deoxycytidine kinase, nuclear (ATP)	Nucleotides	2.7.1.74	( 1633.1 )	-1000	1000	4	IT (2.7.1.74)	Turk B, Awad R, Usova EV, Bjork I, Eriksson S. #TITLE:A pre-steady-state kinetic analysis of substrate binding to human recombinant deoxycytidine kinase: a model for nucleoside kinase action. #JOURNAL:Biochemistry#YEAR:1999#PUBMED:10387103#;Johansson M, Brismar S, Karlsson A.#TITLE:Human deoxycytidine kinase is located in the cell nucleus.#JOURNAL:Proc Natl Acad Sci U S A.#YEAR:1997#PUBMED:934234…
479	DCK2n	Deoxycytidine kinase, nuclear (UTP)	Nucleotides	2.7.1.74	( 1633.1 )	-1000	1000	4	IT (2.7.1.74)	Turk B, Awad R, Usova EV, Bjork I, Eriksson S. #TITLE:A pre-steady-state kinetic analysis of substrate binding to human recombinant deoxycytidine kinase: a model for nucleoside kinase action. #JOURNAL:Biochemistry#YEAR:1999#PUBMED:10387103#;Johansson M, Brismar S, Karlsson A.#TITLE:Human deoxycytidine kinase is located in the cell nucleus.#JOURNAL:Proc Natl Acad Sci U S A.#YEAR:1997#PUBMED:934234…
480	DCMPDA	dCMP deaminase	Pyrimidine Catabolism	3.5.4.12	( 1635.1 )	-1000	1000	2	NCD	Weiner KX, Ciesla J, Jaffe AB, Ketring R, Maley F, Maley GF.#TITLE:Chromosomal location and structural organization of the human deoxycytidylate deaminase gene.#JOURNAL:J Biol Chem#YEAR:1995#PUBMED:7642519#;Weiner KX, Weiner RS, Maley F, Maley GF.#TITLE:Primary structure of human deoxycytidylate deaminase and overexpression of its functional protein in Escherichia coli.#JOURNAL:J Biol Chem.#YEAR:…
481	DCSPTN1COAtx	fatty acid intracellular transport	Transport, Peroxisomal			0	0	2	interaction between peroxisomes and ER (some enzymes on the outer membrane) NJ	Sprecher H#TITLE:An update on the pathways of polyunsaturated fatty acid metabolism#JOURNAL:Curr Opn in Clinical Nutrition and Metabolic Care#YEAR:1999#
482	DCSPTN1CPT1	carnitine O-palmitoyltransferase	Carnitine shuttle	2.3.1.21	( 1375.1 ) or ( 1375.3 ) or ( 1375.4 ) or ( 126129.1 ) or ( 1374.1 ) or ( 1375.2 )	0	1000	4	NJ
483	DCSPTN1CPT2	carnitine transferase	Carnitine shuttle		( 1376.1 )	0	1000	4	NJ
484	DCSPTN1CRNt	transport into the mitochondria (carnitine)	Carnitine shuttle		( 788.1 )	0	1000	4	NJ
485	DCSPTN1t	fatty acid transport via diffusion	Transport, Extracellular			-1000	1000	2	NJ	Schaffer JE.#TITLE:Fatty acid transport: the roads taken.#JOURNAL:Am J Physiol Endocrinol Metab.#YEAR:2002#PUBMED:11788354#;Pownall HJ, Hamilton JA.#TITLE:Energy translocation across cell membranes and membrane models.#JOURNAL:Acta Physiol Scand#YEAR:2003#PUBMED:12864740#
486	DCT	Dopachrome tautomerase	Tyrosine metabolism	5.3.3.12	( 1638.1 )	-1000	1000	4	ISOMERASE SAB added EC and adjusted compounds for balance	Metzler, David E#TITLE:Biochemistry : the chemical reactions of living cells 2 ed vol 2#YEAR:2001#;Yokoyama K, Suzuki H, Yasumoto K, Tomita Y, Shibahara S#TITLE:Molecular cloning and functional analysis of a cDNA coding for human DOPAchrome tautomerase/tyrosinase-related protein-2#JOURNAL:Biochim Biophys Acta#YEAR:1994#PUBMED:8148378#
487	DCTPtn	dCTP diffusion in nucleus	Transport, Nuclear			-1000	1000	2	IT
488	DCYTD	deoxycytidine deaminase	Pyrimidine Catabolism	3.5.4.14	( 978.1 ) or ( 57379.1 )	0	1000	2	LOCUS:_978#TRANSCRIPT:1#ABBREVIATION:CDA#ECNUMBERS:3.5.4.5#	Kuhn K, Bertling WM, Emmrich F.#TITLE:Cloning of a functional cDNA for human cytidine deaminase (CDD) and its use as a marker of monocyte/macrophage differentiation.#JOURNAL:Biochem Biophys Res Commun.#YEAR:1993#PUBMED:8422236#;Saccone S, Besati C, Andreozzi L, Della Valle G, Garattini E, Terao M.#TITLE:Assignment of the human cytidine deaminase (CDA) gene to chromosome 1 band p35-p36.2.#JOURNAL:…
489	DCYTDn	deoxycytidine deaminase, nuclear	Nucleotides	3.5.4.14	( 57379.1 )	0	1000	2	IT	Brar SS, Watson M, Diaz M.#TITLE:Activation-induced cytosine deaminase (AID) is actively exported out of the nucleus but retained by the induction of DNA breaks.#JOURNAL:J Biol Chem.#YEAR:2004#PUBMED:15087440#
490	DDPGAm	2-dehydro-3-deoxy-phosphogluconate aldolase, mitochondrial	Arginine and Proline Metabolism	4.1.2.14		-1000	1000	2	IT rxn is done by 4.1.2.14 and 4.1.3.16 mitochondrial isozyme - NCD	Holmes RP, Assimos DG#TITLE:Glyoxylate synthesis, and its modulation and influence on oxalate synthesis#JOURNAL:J Urol#YEAR:1998#PUBMED:9783918#;Takayama T, Fujita K, Suzuki K, Sakaguchi M, Fujie M, Nagai E, Watanabe S, Ichiyama A, Ogawa Y#TITLE:Control of oxalate formation from L-hydroxyproline in liver mitochondria#JOURNAL:J Am Soc Nephrol#YEAR:2003#PUBMED:12660328#;MAITRA U, DEKKER EE#TITLE:PU…
491	DEBRISOQUINEt	debrisoquine uniport	Transport, Extracellular		( 6582.1 ) or ( 6582.2 )	-1000	1000	4	electrogenic, Na indepdendent &amp; rev NJ	Koepsell H, Endou H#TITLE:The SLC22 drug transporter family#JOURNAL:Pflugers Arch#YEAR:2004#PUBMED:12883891#;Koepsell H, Schmitt BM, Gorboulev V.#TITLE:Organic cation transporters.#JOURNAL:Rev Physiol Biochem Pharmacol#YEAR:2003#PUBMED:12827517#;Zhang L, Dresser MJ, Gray AT, Yost SC, Terashita S, Giacomini KM.#TITLE:Cloning and functional expression of a human liver organic cation transporter.#JO…
492	DESAT16_2	palmitoyl-CoA desaturase (n-C16:0CoA -> n-C16:1CoA)	Fatty acid elongation	1.14.19.1	( 6319.1 )	0	1000	4	for homo sapiens, noted to actually be NADH-cyt b5, using NADH at present NJ	Voet D, Voet JG#TITLE:Biochemistry#YEAR:1995#;Horrobin DF#TITLE:Omega-6 Essential Fatty Acids#YEAR:1990#;Leonard AE, Bobik EG, Dorado J, Kroeger PE, Chuang LT, Thurmond JM, Parker-Barnes JM, Das T, Huang YS, Mukerji P#TITLE:Cloning of a human cDNA encoding a novel enzyme involved in the elongation of long-chain polyunsaturated fatty acids#JOURNAL:Biochem J#YEAR:2000#;Zhang L, Ge L, Parimoo S, Ste…
493	DESAT18_10	fatty acyl-CoA desaturase (n-C18:2CoA -> n-C18:3CoA)	Fatty acid elongation	1.14.19.1	( 9415.1 )	0	1000	4	for homo sapiens, noted to actually be NADH-cyt b5, using NADH at present NJ	Horrobin DF#TITLE:Omega-6 Essential Fatty Acids#YEAR:1990#;Leonard AE, Bobik EG, Dorado J, Kroeger PE, Chuang LT, Thurmond JM, Parker-Barnes JM, Das T, Huang YS, Mukerji P#TITLE:Cloning of a human cDNA encoding a novel enzyme involved in the elongation of long-chain polyunsaturated fatty acids#JOURNAL:Biochem J#YEAR:2000#;Cho HP, Nakamura MT, Clarke SD#TITLE:Cloning, expression, and nutritional r…
494	DESAT18_3	stearoyl-CoA desaturase (n-C18:0CoA -> n-C18:1CoA)	Fatty acid elongation	1.14.19.1	( 6319.1 )	0	0	4	for homo sapiens, noted to actually be NADH-cyt b5, using NADH at present NJ	Voet D, Voet JG#TITLE:Biochemistry#YEAR:1995#;Murray RK, Granner DK, Mayes PA, Rodwell VW#TITLE:Harper&apos;s Biochemistry#YEAR:1999#;Horrobin DF#TITLE:Omega-6 Essential Fatty Acids#YEAR:1990#;Leonard AE, Bobik EG, Dorado J, Kroeger PE, Chuang LT, Thurmond JM, Parker-Barnes JM, Das T, Huang YS, Mukerji P#TITLE:Cloning of a human cDNA encoding a novel enzyme involved in the elongation of long-chai…
495	DESAT18_4	stearoyl-CoA desaturase (n-C18:0CoA -> n-C18:1CoA)	Fatty acid elongation	1.14.19.1	( 6319.1 )	0	1000	4	for homo sapiens, noted to actually be NADH-cyt b5, using NADH at present NJ	Voet D, Voet JG#TITLE:Biochemistry#YEAR:1995#;Murray RK, Granner DK, Mayes PA, Rodwell VW#TITLE:Harper&apos;s Biochemistry#YEAR:1999#;Horrobin DF#TITLE:Omega-6 Essential Fatty Acids#YEAR:1990#;Leonard AE, Bobik EG, Dorado J, Kroeger PE, Chuang LT, Thurmond JM, Parker-Barnes JM, Das T, Huang YS, Mukerji P#TITLE:Cloning of a human cDNA encoding a novel enzyme involved in the elongation of long-chai…
496	DESAT18_5	stearoyl-CoA desaturase (n-C18:0CoA -> n-C18:1CoA)	Fatty acid elongation	1.14.19.1	( 6319.1 )	0	1000	4	for homo sapiens, noted to actually be NADH-cyt b5, using NADH at present NJ	Voet D, Voet JG#TITLE:Biochemistry#YEAR:1995#;Murray RK, Granner DK, Mayes PA, Rodwell VW#TITLE:Harper&apos;s Biochemistry#YEAR:1999#;Horrobin DF#TITLE:Omega-6 Essential Fatty Acids#YEAR:1990#;Leonard AE, Bobik EG, Dorado J, Kroeger PE, Chuang LT, Thurmond JM, Parker-Barnes JM, Das T, Huang YS, Mukerji P#TITLE:Cloning of a human cDNA encoding a novel enzyme involved in the elongation of long-chai…
497	DESAT18_6	fatty acyl-CoA desaturase (n-C18:1CoA -> n-C18:2CoA)	Fatty acid elongation	1.14.19.1	( 9415.1 )	0	1000	4	for homo sapiens, noted to actually be NADH-cyt b5, using NADH at present NJ	Voet D, Voet JG#TITLE:Biochemistry#YEAR:1995#;Horrobin DF#TITLE:Omega-6 Essential Fatty Acids#YEAR:1990#;Leonard AE, Bobik EG, Dorado J, Kroeger PE, Chuang LT, Thurmond JM, Parker-Barnes JM, Das T, Huang YS, Mukerji P#TITLE:Cloning of a human cDNA encoding a novel enzyme involved in the elongation of long-chain polyunsaturated fatty acids#JOURNAL:Biochem J#YEAR:2000#;Cho HP, Nakamura MT, Clarke S…
498	DESAT18_7	fatty acyl-CoA desaturase (n-C18:1CoA -> n-C18:2CoA)	Fatty acid elongation	1.14.19.1	( 9415.1 )	0	1000	4	for homo sapiens, noted to actually be NADH-cyt b5, using NADH at present NJ	Voet D, Voet JG#TITLE:Biochemistry#YEAR:1995#;Horrobin DF#TITLE:Omega-6 Essential Fatty Acids#YEAR:1990#;Leonard AE, Bobik EG, Dorado J, Kroeger PE, Chuang LT, Thurmond JM, Parker-Barnes JM, Das T, Huang YS, Mukerji P#TITLE:Cloning of a human cDNA encoding a novel enzyme involved in the elongation of long-chain polyunsaturated fatty acids#JOURNAL:Biochem J#YEAR:2000#;Cho HP, Nakamura MT, Clarke S…
499	DESAT18_8	fatty acyl-CoA desaturase (n-C18:1CoA -> n-C18:2CoA)	Fatty acid elongation	1.14.19.1	( 9415.1 )	0	1000	4	for homo sapiens, noted to actually be NADH-cyt b5, using NADH at present NJ	Voet D, Voet JG#TITLE:Biochemistry#YEAR:1995#;Horrobin DF#TITLE:Omega-6 Essential Fatty Acids#YEAR:1990#;Leonard AE, Bobik EG, Dorado J, Kroeger PE, Chuang LT, Thurmond JM, Parker-Barnes JM, Das T, Huang YS, Mukerji P#TITLE:Cloning of a human cDNA encoding a novel enzyme involved in the elongation of long-chain polyunsaturated fatty acids#JOURNAL:Biochem J#YEAR:2000#;Cho HP, Nakamura MT, Clarke S…
500	DESAT18_9	fatty acyl-CoA desaturase (n-C18:2CoA -> n-C18:3CoA)	Fatty acid elongation	1.14.19.1	( 9415.1 )	0	1000	4	for homo sapiens, noted to actually be NADH-cyt b5, using NADH at present NJ	Voet D, Voet JG#TITLE:Biochemistry#YEAR:1995#;Horrobin DF#TITLE:Omega-6 Essential Fatty Acids#YEAR:1990#;Leonard AE, Bobik EG, Dorado J, Kroeger PE, Chuang LT, Thurmond JM, Parker-Barnes JM, Das T, Huang YS, Mukerji P#TITLE:Cloning of a human cDNA encoding a novel enzyme involved in the elongation of long-chain polyunsaturated fatty acids#JOURNAL:Biochem J#YEAR:2000#;Cho HP, Nakamura MT, Clarke S…
501	DESAT22_2p	fatty acyl-CoA desaturase (n-C22:5CoA -> n-C22:6CoA)	Fatty acid elongation	1.14.19.1		0	1000	4	for homo sapiens, noted to actually be NADH-cyt b5, using NADH at present Sprecher &quot;An update on the pathways of polyunsaturated fatty acid metabolism&quot; among others describe peroxisomal localization (inner side) n-3 NJ	Sprecher H#TITLE:An update on the pathways of polyunsaturated fatty acid metabolism#JOURNAL:Curr Opn in Clinical Nutrition and Metabolic Care#YEAR:1999#;Horrobin DF#TITLE:Omega-6 Essential Fatty Acids#YEAR:1990#;Leonard AE, Bobik EG, Dorado J, Kroeger PE, Chuang LT, Thurmond JM, Parker-Barnes JM, Das T, Huang YS, Mukerji P#TITLE:Cloning of a human cDNA encoding a novel enzyme involved in the elon…
502	DESAT24_1	fatty acyl-CoA desaturase (n-C24:5CoA -> n-C24:6CoA)	Fatty acid elongation	1.14.19.1	( 9415.1 )	0	1000	4	for homo sapiens, noted to actually be NADH-cyt b5, using NADH at present NJ	Voet D, Voet JG#TITLE:Biochemistry#YEAR:1995#;Murray RK, Granner DK, Mayes PA, Rodwell VW#TITLE:Harper&apos;s Biochemistry#YEAR:1999#;Leonard AE, Bobik EG, Dorado J, Kroeger PE, Chuang LT, Thurmond JM, Parker-Barnes JM, Das T, Huang YS, Mukerji P#TITLE:Cloning of a human cDNA encoding a novel enzyme involved in the elongation of long-chain polyunsaturated fatty acids#JOURNAL:Biochem J#YEAR:2000#;…
503	DGCHOLtx	bile acid intracellular transport	Transport, Peroxisomal			-1000	1000	2	unknown mechanism, however bile acids need to be secreted out of the cell NJ
504	DGK1	deoxyguanylate kinase (dGMP:ATP)	Nucleotides	2.7.4.8	( 2987.1 )	-1000	1000	4	Added EC- JLR	Brady WA, Kokoris MS, Fitzgibbon M, Black ME. #TITLE:Cloning, characterization, and modeling of mouse and human guanylate kinases.#JOURNAL:J Biol Chem#YEAR:1996#PUBMED:8663313#
505	DGK2m	deoxyguanylate kinase (dGMP:dATP) (mitochondrial)	Nucleotides	2.7.4.8		-1000	1000	2	Added EC- JLR IT
506	DGNSKm	deoxyguanosine kinase	Nucleotides	2.7.1.113	( 1716.5 ) or ( 1716.1 ) or ( 1716.4 ) or ( 1716.2 ) or ( 1716.3 )	0	1000	4	LOCUS:_1716#TRANSCRIPT:1#ABBREVIATION:DGUOK#ECNUMBERS:2.7.1.113#	Krawiec K, Kierdaszuk B, Shugar D.#TITLE:Inorganic tripolyphosphate (PPP(i)) as a phosphate donor for human deoxyribonucleoside kinases. #JOURNAL:Biochem Biophys Res Commun. #YEAR:2003#PUBMED:12535661#;Johansson M, Karlsson A.#TITLE:Cloning and expression of human deoxyguanosine kinase cDNA. #JOURNAL:Proc Natl Acad Sci U S A. #YEAR:1996#PUBMED:8692979#
507	DGSNtm	deoyguanosine transport in mitochondria	Transport, Mitochondrial			-1000	1000	2	none	Watkins LF, Lewis RA.#TITLE:The metabolism of deoxyguanosine in mitochondria. Characterization of the uptake process.#JOURNAL:Mol Cell Biochem.#YEAR:1987#PUBMED:3696164#
508	DGTPtn	dGTP diffusion in nucleus	Transport, Nuclear			-1000	1000	2	IT
509	DGULND	dehydro-L-gulonate decarboxylase	Pentose and Glucuronate Interconversions	4.1.1.34		-1000	1000	2	NCD	Devlin, TM#TITLE:Textbook of Biochemistry with Clinical Correlations#YEAR:2001#;Wang YM, van Eys J#TITLE:Nutritional significance of fructose and sugar alcohols#JOURNAL:Annu Rev Nutr.#YEAR:1981#PUBMED:6821187#
510	DHCHOLESTANATEtm	lipid, flip-flop intracellular transport	Transport, Peroxisomal			-1000	1000	2	cholesterol precursor, transport by &quot;diffusion&quot; -&gt; actually beleived to be flip-flop mechanism (PMID: 12840657). NJ	Hamilton JA.#TITLE:Fast flip-flop of cholesterol and fatty acids in membranes: implications for membrane transport proteins.#JOURNAL:Curr Opin Lipidol. #YEAR:2003#PUBMED:12840657#
511	DHCR243r	24-dehydrocholesterol reductase [Precursor]	Cholesterol Metabolism		( 1718.1 )	0	0	4	lanosterol -&gt; cholesterol pathway FAD known to be cofactor, other details missing NJ	Marijanovic Z, Laubner D, Moller G, Gege C, Husenn B, Adamski J, Breitling R#TITLE:Closing the gap: Identification of human 3-ketosteroid reductase, the last unknown enzyme of mammalian cholesterol biosynthesis#JOURNAL:Molecular Endocrinology#YEAR:2005#
512	DHCR71r	7-dehydrocholesterol reductase	Cholesterol Metabolism	1.3.1.21	( 1717.1 )	0	0	4	lanosterol -&gt; cholesterol pathway see paper refs Moebius et al PNAS 95:1899-1902 - check/re-check lit for more specific details (NADPH known to be cofactor - also NADH?, possibly rev?) NJ	Marijanovic Z, Laubner D, Moller G, Gege C, Husenn B, Adamski J, Breitling R#TITLE:Closing the gap: Identification of human 3-ketosteroid reductase, the last unknown enzyme of mammalian cholesterol biosynthesis#JOURNAL:Molecular Endocrinology#YEAR:2005#;Moebius FF, Fitzky BU, Lee, JN, Paik YK, Glossmann H#TITLE:Molecular cloning and expression of the human delta-7-sterol reductase#JOURNAL:PNAS#YE…
513	DHCR72r	7-dehydrocholesterol reductase	Cholesterol Metabolism	1.3.1.21	( 1717.1 )	0	1000	4	lanosterol -&gt; cholesterol pathway see paper refs Moebius et al PNAS 95:1899-1902 - check/re-check lit for more specific details (NADPH known to be cofactor - also NADH?, possibly rev?) NJ	Marijanovic Z, Laubner D, Moller G, Gege C, Husenn B, Adamski J, Breitling R#TITLE:Closing the gap: Identification of human 3-ketosteroid reductase, the last unknown enzyme of mammalian cholesterol biosynthesis#JOURNAL:Molecular Endocrinology#YEAR:2005#;Moebius FF, Fitzky BU, Lee, JN, Paik YK, Glossmann H#TITLE:Molecular cloning and expression of the human delta-7-sterol reductase#JOURNAL:PNAS#YE…
514	DHCRD1	dihydroceramide desaturase	Sphingolipid Metabolism		( 8560.1 ) or ( 8560.2 )	0	1000	4	NJ	Varki, Cummings, Esko, Freeze, Hart, Marth#TITLE:Essentials of Glycobiology#YEAR:1999#;Voet D, Voet JG#TITLE:Biochemistry#YEAR:1995#;Murray RK, Granner DK, Mayes PA, Rodwell VW#TITLE:Harper&apos;s Biochemistry#YEAR:1999#;Cadena DL, Kurten RC, Gill GN.#TITLE:The product of the MLD gene is a member of the membrane fatty acid desaturase family: overexpression of MLD inhibits EGF receptor biosynthesi…
515	DHCRD2	dihydroceramide desaturase	Sphingolipid Metabolism		( 8560.1 ) or ( 8560.2 )	0	1000	4	NJ	Varki, Cummings, Esko, Freeze, Hart, Marth#TITLE:Essentials of Glycobiology#YEAR:1999#;Voet D, Voet JG#TITLE:Biochemistry#YEAR:1995#;Murray RK, Granner DK, Mayes PA, Rodwell VW#TITLE:Harper&apos;s Biochemistry#YEAR:1999#;Cadena DL, Kurten RC, Gill GN.#TITLE:The product of the MLD gene is a member of the membrane fatty acid desaturase family: overexpression of MLD inhibits EGF receptor biosynthesi…
516	DHEASULT	Dehydroepiandrosterone sulfotransferase	Steroid Metabolism	2.8.2.2	( 6783.1 ) or ( 6822.1 )	0	1000	4	NJ	Otterness DM, Wieben ED, Wood TC, Watson WG, Madden BJ, McCormick DJ, Weinshilboum RM.#TITLE:Human liver dehydroepiandrosterone sulfotransferase: molecular cloning and expression of cDNA.#JOURNAL:Mol Pharmacol#YEAR:1992#PUBMED:1588921#;Glatt H, Boeing H, Engelke CE, Ma L, Kuhlow A, Pabel U, Pomplun D, Teubner W, Meinl W.#TITLE:Human cytosolic sulphotransferases: genetics, characteristics, toxicol…
517	DHFR	dihydrofolate reductase	Folate Metabolism	1.5.1.3	( 1719.1 )	-1000	1000	2	The enzyme from animals and some micro-organisms also slowly reduces folate to 5,6,7,8-tetrahydrofolate	Ball, G.F.M#TITLE:Vitamins: Their Role in the Human Body#YEAR:2004#;Funanage VL, Myoda TT, Moses PA, Cowell HR.#TITLE:Assignment of the human dihydrofolate reductase gene to the q11----q22 region of chromosome 5.#JOURNAL:Mol Cell Biol. #YEAR:1984#PUBMED:6504041#
518	DHFtl	dihydrofolate reversible lysosomal transport	Transport, Lysosomal			-1000	1000	2	NCD,IT	Suh JR, Herbig AK, Stover PJ. #TITLE:New perspectives on folate catabolism. #JOURNAL:Annu Rev Nutr.#YEAR:2001#PUBMED:11375437#
519	DHFtm	dihydrofolate reversible mitochondrial transport	Transport, Mitochondrial			-1000	1000	2	NCD	Suh JR, Herbig AK, Stover PJ. #TITLE:New perspectives on folate catabolism. #JOURNAL:Annu Rev Nutr.#YEAR:2001#PUBMED:11375437#
520	DHORD9	dihydoorotic acid dehydrogenase (quinone10)	Pyrimidine Biosynthesis		( 1723.1 )	0	0	4	_06-15-05 - EC 1.3.3.1 IT based on Bader et al, 1998, Prot. Expr. Purif,., 13,414-422 (I guess it is ubiquinone but i am not sure ) (needs FMN as cofactor) v(enzyme is located in inner-membrane of mitochondria, reaction take place in cytosol (Fig. 8 Rawls et al PMID: 10727948 )	Bader B, Knecht W, Fries M, Loffler M.#TITLE: Expression, purification, and characterization of histidine-tagged rat and human flavoenzyme dihydroorotate dehydrogenase.#JOURNAL:Protein Expr Purif.#YEAR:1998#PUBMED:9693067#;Loffler M, Jockel J, Schuster G, Becker C.#TITLE:Dihydroorotat-ubiquinone oxidoreductase links mitochondria in the biosynthesis of pyrimidine nucleotides.#JOURNAL:Mol Cell Bioc…
521	DHORTS	dihydroorotase	Pyrimidine Biosynthesis	3.5.2.3	( 790.1 )	0	0	4	LOCUS:_790#TRANSCRIPT:1#ABBREVIATION:CAD1#ECNUMBERS:6.3.5.5,2.1.3.2,3.5.2.3#	Iwahana H, Fujimura M, Ii S, Kondo M, Moritani M, Takahashi Y, Yamaoka T, Yoshimoto K, Itakura M.#TITLE:Molecular cloning of a human cDNA encoding a trifunctional enzyme of carbamoyl-phosphate synthetase-aspartate transcarbamoylase-dihydroorotase in de Novo pyrimidine synthesis. #JOURNAL:Biochem Biophys Res Commun.#YEAR:1996#PUBMED:8619816#;Chen KC, Vannais DB, Jones C, Patterson D, Davidson JN.#…
522	DHPM1	dihydropyrimidinase (5,6-dihydrouracil)	Pyrimidine Catabolism	3.5.2.2	( 1807.1 ) or ( 1809.1 ) or ( 1808.1 )	0	1000	4	LOCUS:_1807#TRANSCRIPT:1#ABBREVIATION:DPYS#	Hamajima N, Matsuda K, Sakata S, Tamaki N, Sasaki M, Nonaka M. #TITLE:A novel gene family defined by human dihydropyrimidinase and three related proteins with differential tissue distribution. #JOURNAL:Gene#YEAR:1996#PUBMED:8973361#
523	DHPM2	dihydropyrimidinase (dihydrothymine)	Pyrimidine Catabolism	3.5.2.2		0	1000	2	Also acts on dihydrothymine and hydantoin	Devlin, TM#TITLE:Textbook of Biochemistry with Clinical Correlations#YEAR:2001#;Orten JM, Neuhaus OW.#TITLE:Human Biochemistry#YEAR:1975#
524	DHPR	6,7-dihydropteridine reductase	Tetrahydrobiopterin		( 5860.1 )	0	1000	4	IT EC 1.5.1.34	Thony B, Auerbach G, Blau N.#TITLE:Tetrahydrobiopterin biosynthesis, regeneration and functions.#JOURNAL:Biochem J#YEAR:2000#PUBMED:10727395#
525	DIDPtn	dIDP nuclear transport	Transport, Nuclear			-1000	1000	2	NCD
526	DIGALSIDEtg	digalside hs intracellular transport	Transport, Golgi Apparatus			-1000	1000	1	unknown mechanism for transport - however must get to other intracellular compartments (e.g. lysosome for degradation) NJ
527	DIGALSIDEtl	digalside hs intracellular transport	Transport, Lysosomal			-1000	1000	1	unknown mechanism for transport - however must get to other intracellular compartments (e.g. lysosome for degradation) NJ
528	DINt	deoxyinosine transport via diffusion	Transport, Extracellular			-1000	1000	2	none	Rampazzo C, Gallinaro L, Milanesi E, Frigimelica E, Reichard P, Bianchi V#TITLE:A deoxyribonucleotidase in mitochondria: involvement in regulation of dNTP pools and possible link to genetic disease.#JOURNAL:Proc Natl Acad Sci U S A.#YEAR:2000#PUBMED:10899995#
529	DITPtn	dITP nuclear transport	Transport, Nuclear			-1000	1000	2	NCD
530	DKMPPD	2,3-diketo-5-methylthio-1-phosphopentane degradation reaction	Arginine and Proline Metabolism			0	1000	2	JLR- based on B. subtilis and K. pneumoniae reactions (not sure about the h2o and h)	Myers RW, Abeles RH#TITLE:Conversion of 5-S-ethyl-5-thio-D-ribose to ethionine in Klebsiella pneumoniae. Basis for the selective toxicity of 5-S-ethyl-5-thio-D-ribose#JOURNAL:J Biol Chem#YEAR:1989#PUBMED:2543672#
531	DLNLCGCPT1	carnitine O-palmitoyltransferase	Carnitine shuttle	2.3.1.21	( 1375.1 ) or ( 1375.3 ) or ( 1375.4 ) or ( 126129.1 ) or ( 1374.1 ) or ( 1375.2 )	0	1000	4	NJ
532	DLNLCGCPT2	carnitine transferase	Carnitine shuttle		( 1376.1 )	0	1000	4	NJ
533	DLNLCGCRNt	transport into the mitochondria (carnitine)	Carnitine shuttle		( 788.1 )	0	1000	4	NJ
534	DMATTx	dimethylallyltranstransferase	Cholesterol Metabolism	2.5.1.1	( 2224.1 )	0	1000	4	peroxisomal version - NJ	Biardi L, Krisans K#TITLE:Compartmentalization of cholesterol biosynthesis#JOURNAL:Journal of Biological Chemistry#YEAR:1996#;Voet D, Voet JG#TITLE:Biochemistry#YEAR:1995#;Olivier LM, Krisans SK#TITLE:Peroxisomal protein targeting and identification of peroxisomal targeting signals in cholesterol biosynthetic enzymes#JOURNAL:Biochimica et Biophysica Acta#YEAR:2000#
535	DMGDHm	dimethylglycine dehydrogenase, mitochondrial	Glycine, Serine, and Threonine Metabolism	1.5.99.2	( 29958.1 )	0	1000	4	MM	Binzak BA, Wevers RA, Moolenaar SH#TITLE:Cloning of dimethylglycine dehydrogenase and a new human inborn error of metabolism, dimethylglycine dehydrogenase deficiency.#YEAR:2001#PUBMED:1123190#;Binzak,B.A. , Vockley,J.G. , Jenkins,R.B. , Vockley,J. #TITLE:Structure and analysis of the human dimethylglycine dehydrogenase gene.#YEAR:2000#PUBMED:10767172#
536	DMGtm	dimethylglycine transport via diffusion (cytosol to mitochondria)	Transport, Mitochondrial			-1000	1000	2	MM
537	DM_dctp(m)	dCTP demand	Miscellaneous			0	0	0	none
538	DM_dgtp(m)	DM dgtp(m)	Miscellaneous			0	0	0	IT
539	DM_dttp(m)	dTTP demand	Miscellaneous			0	0	0	none
540	DM_gpi_sig(er)	DM gpi sig(er)	Miscellaneous			0	0	0	NCD
541	DM_kdn_c	DM kdn(c)	Miscellaneous			0	0	0	NCD
542	DM_melanin_c	DM melanin(c)	Miscellaneous			0	0	0	SAB demand for melanin in cytosol because there is no specific melanosome compartment
543	DM_sprm_c	DM sprm(c)	Miscellaneous			0	0	0	SAB potential &quot;biomass&quot; component--may associate with DNA
544	DNADDP	Deaminido NAD diphosphatase	NAD Metabolism	3.6.1.9	( 5167.1 ) or ( 5169.1 ) or ( 5168.1 )	0	1000	2	LOCUS:_5167#TRANSCRIPT:1#ABBREVIATION:ENPP1#ECNUMBERS:3.1.4.1,3.6.1.9#	Funakoshi I, Kato H, Horie K, Yano T, Hori Y, Kobayashi H, Inoue T, Suzuki H, Fukui S, Tsukahara M, et al.#TITLE:Molecular cloning of cDNAs for human fibroblast nucleotide pyrophosphatase.#JOURNAL:Arch Biochem Biophys.#YEAR:1992#PUBMED:1315502#
545	DNDPt11m	dADP transport via dGDP antiport	Transport, Mitochondrial		( 60386.1 )	0	1000	4	IT	Dolce V, Fiermonte G, Runswick MJ, Palmieri F, Walker JE. #TITLE:The human mitochondrial deoxynucleotide carrier and its role in the toxicity of nucleoside antivirals.#JOURNAL:Proc Natl Acad Sci U S A.#YEAR:2001#PUBMED:11226231#
546	DNDPt28m	dCDP transport via dGDP antiport	Transport, Mitochondrial		( 60386.1 )	0	1000	4	IT	Dolce V, Fiermonte G, Runswick MJ, Palmieri F, Walker JE. #TITLE:The human mitochondrial deoxynucleotide carrier and its role in the toxicity of nucleoside antivirals.#JOURNAL:Proc Natl Acad Sci U S A.#YEAR:2001#PUBMED:11226231#
547	DOLASNT_Ler	Dolichyl-diphosphooligosaccharide:protein-L-asparagine oligopolysaccharidotransferase (liver)	N-Glycan Biosynthesis	2.4.1.119	( 6185.1 and 1650.1 and 6184.1 and 1603.1 )	0	1000	0	NCD
548	DOLASNT_Uer	Dolichyl-diphosphooligosaccharide:protein-L-asparagine oligopolysaccharidotransferase (uterus)	N-Glycan Biosynthesis	2.4.1.119	( 6185.1 and 1650.1 and 6184.1 and 1603.1 )	0	1000	0	NCD	Nakashima T, Sekiguchi T, Kuraoka A, Fukushima K, Shibata Y, Komiyama S, Nishimoto T.#TITLE:Molecular cloning of a human cDNA encoding a novel protein, DAD1, whose defect causes apoptotic cell death in hamster BHK21 cells.#JOURNAL:Mol Cell Biol#YEAR:1993#PUBMED:8413235#;Yamagata T, Tsuru T, Momoi MY, Suwa K, Nozaki Y, Mukasa T, Ohashi H, Fukushima Y, Momoi T#TITLE:Genome organization of human 48-…
549	DOLDPP_Ler	Dolichyl-diphosphate phosphohydrolase, human (liver)	N-Glycan Biosynthesis	3.6.1.43	( 57171.1 )	0	1000	0	NCD	Helenius J, Aebi M.#TITLE:Transmembrane movement of dolichol linked carbohydrates during N-glycoprotein biosynthesis in the endoplasmic reticulum#JOURNAL:Semin Cell Dev Biol#YEAR:2002#PUBMED:12137737#
550	DOLDPP_Uer	Dolichyl-diphosphate phosphohydrolase, human (uterus)	N-Glycan Biosynthesis	3.6.1.43	( 57171.1 )	0	1000	0	NCD	Helenius J, Aebi M.#TITLE:Transmembrane movement of dolichol linked carbohydrates during N-glycoprotein biosynthesis in the endoplasmic reticulum#JOURNAL:Semin Cell Dev Biol#YEAR:2002#PUBMED:12137737#
551	DOLGLCP_Lter	Dolichyl beta-D-glucosyl phosphate flippase (liver)	N-Glycan Biosynthesis			0	1000	0	NCD	Helenius J, Aebi M.#TITLE:Transmembrane movement of dolichol linked carbohydrates during N-glycoprotein biosynthesis in the endoplasmic reticulum#JOURNAL:Semin Cell Dev Biol#YEAR:2002#PUBMED:12137737#
552	DOLGLCP_Uter	Dolichyl beta-D-glucosyl phosphate flippase (uterus)	N-Glycan Biosynthesis			0	1000	0	NCD	Helenius J, Aebi M.#TITLE:Transmembrane movement of dolichol linked carbohydrates during N-glycoprotein biosynthesis in the endoplasmic reticulum#JOURNAL:Semin Cell Dev Biol#YEAR:2002#PUBMED:12137737#
553	DOLMANP_Lter	dolichol-phosphate mannose flippase (liver)	N-Glycan Biosynthesis			0	1000	0	NCD	Helenius J, Aebi M.#TITLE:Transmembrane movement of dolichol linked carbohydrates during N-glycoprotein biosynthesis in the endoplasmic reticulum#JOURNAL:Semin Cell Dev Biol#YEAR:2002#PUBMED:12137737#
554	DOLMANP_Uter	dolichol-phosphate mannose flippase (uterus)	N-Glycan Biosynthesis			0	1000	0	NCD	Helenius J, Aebi M.#TITLE:Transmembrane movement of dolichol linked carbohydrates during N-glycoprotein biosynthesis in the endoplasmic reticulum#JOURNAL:Semin Cell Dev Biol#YEAR:2002#PUBMED:12137737#
555	DOLPGT1_Ler	dolichyl-phosphate-glucose-glycolipid alpha-glucosyltransferase (liver)	N-Glycan Biosynthesis		( 29929.1 )	0	1000	0	EC 2.4.1.- NCD	Varki, Cummings, Esko, Freeze, Hart, Marth#TITLE:Essentials of Glycobiology#YEAR:1999#
556	DOLPGT1_Uer	dolichyl-phosphate-glucose-glycolipid alpha-glucosyltransferase (uterus)	N-Glycan Biosynthesis		( 29929.1 )	0	1000	0	EC 2.4.1.- NCD	Varki, Cummings, Esko, Freeze, Hart, Marth#TITLE:Essentials of Glycobiology#YEAR:1999#;Imbach T, Burda P, Kuhnert P, Wevers RA, Aebi M, Berger EG, Hennet T.#TITLE:A mutation in the human ortholog of the Saccharomyces cerevisiae ALG6 gene causes carbohydrate-deficient glycoprotein syndrome type-Ic.#JOURNAL:Proc Natl Acad Sci USA#YEAR:1999#PUBMED:10359825#
557	DOLPGT2_Ler	dolichyl-phosphate-glucose-glycolipid alpha-glucosyltransferase (liver)	N-Glycan Biosynthesis		( 79053.1 ) or ( 79053.3 ) or ( 79053.2 )	0	1000	0	EC 2.4.1.- NCD	Varki, Cummings, Esko, Freeze, Hart, Marth#TITLE:Essentials of Glycobiology#YEAR:1999#
558	DOLPGT2_Uer	dolichyl-phosphate-glucose-glycolipid alpha-glucosyltransferase (uterus)	N-Glycan Biosynthesis		( 79053.1 ) or ( 79053.3 ) or ( 79053.2 )	0	1000	0	EC 2.4.1.- NCD	Varki, Cummings, Esko, Freeze, Hart, Marth#TITLE:Essentials of Glycobiology#YEAR:1999#
559	DOLPGT3_Ler	dolichyl-phosphate-glucose-glycolipid alpha-glucosyltransferase (liver)	N-Glycan Biosynthesis		( 84920.1 )	0	1000	0	EC 2.4.1.- NCD	Varki, Cummings, Esko, Freeze, Hart, Marth#TITLE:Essentials of Glycobiology#YEAR:1999#
560	DOLPGT3_Uer	dolichyl-phosphate-glucose-glycolipid alpha-glucosyltransferase (uterus)	N-Glycan Biosynthesis		( 84920.1 )	0	1000	0	EC 2.4.1.- NCD	Varki, Cummings, Esko, Freeze, Hart, Marth#TITLE:Essentials of Glycobiology#YEAR:1999#
561	DOLPMT1_Ler	dolichyl-phosphate-mannose-glycolipid alpha-mannosyltransferase (liver)	N-Glycan Biosynthesis	2.4.1.130	( 10195.4 ) or ( 10195.1 ) or ( 10195.3 ) or ( 10195.2 )	0	1000	0	NCD	Varki, Cummings, Esko, Freeze, Hart, Marth#TITLE:Essentials of Glycobiology#YEAR:1999#
562	DOLPMT1_Uer	dolichyl-phosphate-mannose-glycolipid alpha-mannosyltransferase (uterus)	N-Glycan Biosynthesis	2.4.1.130	( 10195.4 ) or ( 10195.1 ) or ( 10195.3 ) or ( 10195.2 )	0	1000	0	NCD	Varki, Cummings, Esko, Freeze, Hart, Marth#TITLE:Essentials of Glycobiology#YEAR:1999#
563	DOLPMT2_Ler	dolichyl-phosphate-mannose-glycolipid alpha-mannosyltransferase (liver)	N-Glycan Biosynthesis	2.4.1.130		0	1000	0	NCD	Varki, Cummings, Esko, Freeze, Hart, Marth#TITLE:Essentials of Glycobiology#YEAR:1999#
564	DOLPMT2_Uer	dolichyl-phosphate-mannose-glycolipid alpha-mannosyltransferase (uterus)	N-Glycan Biosynthesis	2.4.1.130		0	1000	0	NCD	Varki, Cummings, Esko, Freeze, Hart, Marth#TITLE:Essentials of Glycobiology#YEAR:1999#
565	DOLPMT3_Ler	dolichyl-phosphate-mannose-glycolipid alpha-mannosyltransferase (liver)	N-Glycan Biosynthesis	2.4.1.130	( 79087.1 )	0	1000	0	NCD	Varki, Cummings, Esko, Freeze, Hart, Marth#TITLE:Essentials of Glycobiology#YEAR:1999#
566	DOLPMT3_Uer	dolichyl-phosphate-mannose-glycolipid alpha-mannosyltransferase (uterus)	N-Glycan Biosynthesis	2.4.1.130	( 79087.1 )	0	1000	0	NCD	Varki, Cummings, Esko, Freeze, Hart, Marth#TITLE:Essentials of Glycobiology#YEAR:1999#
567	DOLPMT4_Ler	dolichyl-phosphate-mannose-glycolipid alpha-mannosyltransferase (liver)	N-Glycan Biosynthesis	2.4.1.130		0	1000	0	NCD	Varki, Cummings, Esko, Freeze, Hart, Marth#TITLE:Essentials of Glycobiology#YEAR:1999#
568	DOLPMT4_Uer	dolichyl-phosphate-mannose-glycolipid alpha-mannosyltransferase (uterus)	N-Glycan Biosynthesis	2.4.1.130		0	1000	0	NCD	Varki, Cummings, Esko, Freeze, Hart, Marth#TITLE:Essentials of Glycobiology#YEAR:1999#
569	DOLPMT_L	Dolichyl-phosphate D-mannosyltransferase (liver)	N-Glycan Biosynthesis	2.4.1.83	( 54344.2 and 8818.1 and 8813.1 ) or ( 8818.2 and 54344.1 and 8813.1 ) or ( 8818.1 and 54344.1 and 8813.1 ) or ( 54344.2 and 8818.2 and 8813.1 )	0	1000	0	NCD	Manos EJ, Kim ML, Kassis J, Chang PY, Wells A, Jones DA.#TITLE:Dolichol-phosphate-mannose-3 (DPM3)/prostin-1 is a novel phospholipase C-gamma regulated gene negatively associated with prostate tumor invasion.#JOURNAL:Oncogene#YEAR:2001#PUBMED:11420690#
570	DOLPMT_U	Dolichyl-phosphate D-mannosyltransferase (uterus)	N-Glycan Biosynthesis	2.4.1.83	( 54344.2 and 8818.1 and 8813.1 ) or ( 8818.2 and 54344.1 and 8813.1 ) or ( 8818.1 and 54344.1 and 8813.1 ) or ( 54344.2 and 8818.2 and 8813.1 )	0	1000	0	NCD	Manos EJ, Kim ML, Kassis J, Chang PY, Wells A, Jones DA.#TITLE:Dolichol-phosphate-mannose-3 (DPM3)/prostin-1 is a novel phospholipase C-gamma regulated gene negatively associated with prostate tumor invasion.#JOURNAL:Oncogene#YEAR:2001#PUBMED:11420690#
571	DOLP_Lter	dolichol phosphate flippase (liver)	N-Glycan Biosynthesis			0	1000	0	NCD	Helenius J, Aebi M.#TITLE:Transmembrane movement of dolichol linked carbohydrates during N-glycoprotein biosynthesis in the endoplasmic reticulum#JOURNAL:Semin Cell Dev Biol#YEAR:2002#PUBMED:12137737#
572	DOLP_Uter	dolichol phosphate flippase (uterus)	N-Glycan Biosynthesis			0	1000	0	NCD	Helenius J, Aebi M.#TITLE:Transmembrane movement of dolichol linked carbohydrates during N-glycoprotein biosynthesis in the endoplasmic reticulum#JOURNAL:Semin Cell Dev Biol#YEAR:2002#PUBMED:12137737#
573	DOPABMO	dopamine beta-monooxygenase	Tyrosine metabolism	1.14.17.1	( 26002.1 ) or ( 1621.1 )	0	1000	4	SAB	Metzler, David E#TITLE:Biochemistry : the chemical reactions of living cells 2 ed vol 2#YEAR:2001#
574	DOPACHRMISO	L-dopachrome isomerase 1	Tyrosine metabolism		( 7299.1 )	0	1000	4	SAB	Metzler, David E#TITLE:Biochemistry : the chemical reactions of living cells 2 ed vol 2#YEAR:2001#;Aaron Bunsen Lerner, Thomas B. Fitzpatrick, Evan Calkins, and William H. Summerson#TITLE:MAMMALIAN TYROSINASE: PREPARATION AND PROPERTIES#JOURNAL:J. Biol. Chem#YEAR:1949#;Pomerantz SH#TITLE:The tyrosine hydroxylase activity of mammalian tyrosinase#JOURNAL:J Biol Chem#YEAR:1968#PUBMED:5294951#
575	DOPAQNISO1	Dopaquinone isomerase 1	Tyrosine metabolism			-1000	1000	4	SAB	Metzler, David E#TITLE:Biochemistry : the chemical reactions of living cells 2 ed vol 2#YEAR:2001#;Aaron Bunsen Lerner, Thomas B. Fitzpatrick, Evan Calkins, and William H. Summerson#TITLE:MAMMALIAN TYROSINASE: PREPARATION AND PROPERTIES#JOURNAL:J. Biol. Chem#YEAR:1949#;Pomerantz SH#TITLE:The tyrosine hydroxylase activity of mammalian tyrosinase#JOURNAL:J Biol Chem#YEAR:1968#PUBMED:5294951#
576	DOPASFt	Dopamine 3-0-sulfate transport (diffusion)	Transport, Extracellular			0	1000	1	SAB excretion of dopamine sulfate
577	DOPASULT	Dopamine Sulfotransferase	Tyrosine metabolism	2.8.2.1	( 6799.1 ) or ( 6817.3 ) or ( 6799.2 ) or ( 6818.2 ) or ( 6817.2 ) or ( 6818.1 ) or ( 6817.1 ) or ( 6817.4 ) or ( 6818.3 ) or ( 6817.5 )	0	1000	4	RS/TV (6/14/2005)	Chapman E, Best MD, Hanson SR, Wong CH.#TITLE:Sulfotransferases: structure, mechanism, biological activity, inhibition, and synthetic utility.#JOURNAL:Angew Chem Int Ed Engl#YEAR:2004#PUBMED:15293241#;Glatt H, Boeing H, Engelke CE, Ma L, Kuhlow A, Pabel U, Pomplun D, Teubner W, Meinl W.#TITLE:Human cytosolic sulphotransferases: genetics, characteristics, toxicological aspects.#JOURNAL:Mutat Res#Y…
578	DOPAVESSEC	Dopamine secretion via secretory vesicle (ATP driven)	Transport, Extracellular		( 6570.1 ) or ( 6571.1 )	0	1000	4	SAB This reaction represents the ATP driven secretion of dopa from the cell. It leaves out the vesicle because that is not a compartment. ATP:H ratio is assumed as 1:3 for vacuolar ATPase and substrate:h ratio is 1:2. This gives a 3:2 ratio for substrate:ATP	Wagner CA, Finberg KE, Breton S, Marshansky V, Brown D, Geibel JP#TITLE:Renal vacuolar H+-ATPase#JOURNAL:Physiol Rev#YEAR:2004#PUBMED:15383652#;Eiden LE, Schafer MK, Weihe E, Schutz B#TITLE:The vesicular amine transporter family (SLC18): amine/proton antiporters required for vesicular accumulation and regulated exocytotic secretion of monoamines and acetylcholine#JOURNAL:Pflugers Arch#YEAR:2004#P…
579	DOPAt4(2)r	Dopamine reversible transport in via sodium symport (1:2)	Transport, Extracellular		( 6530.1 ) or ( 6531.1 )	-1000	1000	4	SAB	Chen NH, Reith ME, Quick MW#TITLE:Synaptic uptake and beyond: the sodium- and chloride-dependent neurotransmitter transporter family SLC6#JOURNAL:Pflugers Arch#YEAR:2004#PUBMED:12719981#
580	DOPAtu	Dopamine uniport	Transport, Extracellular		( 6581.1 ) or ( 6582.2 ) or ( 6582.1 )	-1000	1000	4	SAB electrogenic, Na indepdendent &amp; rev NJ	Koepsell H, Endou H#TITLE:The SLC22 drug transporter family#JOURNAL:Pflugers Arch#YEAR:2004#PUBMED:12883891#
581	DPCOAPP	pyrophasphatase (dephospho-CoA)	CoA Catabolism			0	1000	2	IT	Bender DA#TITLE:Nutritional Biochemistry of the Vitamins#YEAR:2003#
582	DPCOAtl	dephospho-CoA transport from lysosome via diffusion	Transport, Lysosomal			-1000	1000	2	IT	Bender DA#TITLE:Nutritional Biochemistry of the Vitamins#YEAR:2003#;Seetharam B, Alpers DH.#TITLE:Absorption and transport of cobalamin (vitamin B12).#JOURNAL:Annu Rev Nutr.#YEAR:1982#PUBMED:6313022#
583	DPGM	Diphosphoglyceromutase	Glycolysis/Gluconeogenesis		( 669.1 ) or ( 5223.1 ) or ( 5224.2 ) or ( 5224.1 ) or ( 669.2 )	-1000	1000	0	LOCUS:_669#TRANSCRIPT:1#ABBREVIATION:BPGM#ECNUMBERS:5.4.2.4#
584	DPGase	Diphosphoglycerate phosphatase	Glycolysis/Gluconeogenesis	3.1.3.13	( 669.2 ) or ( 5223.1 ) or ( 5224.2 ) or ( 5224.1 ) or ( 669.1 )	0	1000	0	added EC num; also EC 5.4.2.4 -- NCD
585	DPMVDx	diphosphomevalonate decarboxylase	Cholesterol Metabolism	4.1.1.33	( 4597.1 )	0	1000	4	peroxisomal version - NJ	Iglesias J, Gonzalez-Pacanowska D, Caamano G, Garcia-Peregrin E#TITLE:Mevalonate 5-pyrophosphate decarboxylase in isolated villus and crypt cells of chick intestine#JOURNAL:Lipids#YEAR:1988#;Voet D, Voet JG#TITLE:Biochemistry#YEAR:1995#;Olivier LM, Krisans SK#TITLE:Peroxisomal protein targeting and identification of peroxisomal targeting signals in cholesterol biosynthetic enzymes#JOURNAL:Biochim…
586	DPROOp	D-proline oxidase, perixosomal	Arginine and Proline Metabolism		( 1610.1 )	0	1000	4	MM
587	DSAT	dihydrosphingosine N-acyltransferase	Sphingolipid Metabolism			0	1000	2	CoA transfer not explicitly in rxn (accounted for in Rtotal rxn -&gt; ARTF) NJ	Varki, Cummings, Esko, Freeze, Hart, Marth#TITLE:Essentials of Glycobiology#YEAR:1999#;Voet D, Voet JG#TITLE:Biochemistry#YEAR:1995#;Murray RK, Granner DK, Mayes PA, Rodwell VW#TITLE:Harper&apos;s Biochemistry#YEAR:1999#
588	DTDPtn	dTDP nuclear transport	Transport, Nuclear			-1000	1000	2	NCD
589	DTMPK	dTMP kinase	Nucleotides	2.7.4.9	( 1841.1 )	-1000	1000	4	LOCUS:_1841#TRANSCRIPT:1#ABBREVIATION:DTYMK#ECNUMBERS:2.7.4.9#	Su JY, Sclafani RA.#TITLE:Molecular cloning and expression of the human deoxythymidylate kinase gene in yeast.#JOURNAL:Nucleic Acids Res.#YEAR:1991#PUBMED:2017365#;Huang SH, Tang A, Drisco B, Zhang SQ, Seeger R, Li C, Jong A.#TITLE:Human dTMP kinase: gene expression and enzymatic activity coinciding with cell cycle progression and cell growth.#JOURNAL:DNA Cell Biol.#YEAR:1994#PUBMED:8024690#
590	DTTPtn	dTTP diffusion in nucleus	Transport, Nuclear			-1000	1000	2	IT
591	DUDPtn	dUDP nuclear transport	Transport, Nuclear			-1000	1000	2	IT
592	DUMPtn	dUMP nuclear transport	Transport, Nuclear			-1000	1000	2	NCD
593	DURAD	dihydrouracil dehydrogenase (NADP)	Pyrimidine Catabolism	1.3.1.2	( 1806.1 )	-1000	1000	4	_01-26-05 IT based on Lu et al., JBC,1992,24,17102-17109	Lu Z, Zhang R, Diasio RB. #TITLE:Dihydropyrimidine dehydrogenase activity in human peripheral blood mononuclear cells and liver: population characteristics, newly identified deficient patients, and clinical implication in 5-fluorouracil chemotherapy. #JOURNAL:Cancer Res.#YEAR:1993#PUBMED:8221682#;Lu ZH, Zhang R, Diasio RB.#TITLE:Purification and characterization of dihydropyrimidine dehydrogenase…
594	DURAD2	dihydrothymin dehydrogenase (NADP)	Pyrimidine Catabolism	1.3.1.2	( 1806.1 )	-1000	1000	4	_01-26-05 IT based on Lu et al., JBC,1992,24,17102-17109	Lu Z, Zhang R, Diasio RB. #TITLE:Dihydropyrimidine dehydrogenase activity in human peripheral blood mononuclear cells and liver: population characteristics, newly identified deficient patients, and clinical implication in 5-fluorouracil chemotherapy. #JOURNAL:Cancer Res.#YEAR:1993#PUBMED:8221682#;Lu ZH, Zhang R, Diasio RB.#TITLE:Purification and characterization of dihydropyrimidine dehydrogenase…
595	DURIK1	deoxyuridine kinase (ATP:Deoxyuridine)	Nucleotides		( 7083.1 ) or ( 7084.1 )	0	1000	2	LOCUS:_7083#TRANSCRIPT:1#ABBREVIATION:TK1#ECNUMBERS:2.7.1.21#	Johansson M, Brismar S, Karlsson A.#TITLE:Human deoxycytidine kinase is located in the cell nucleus.#JOURNAL:Proc Natl Acad Sci U S A.#YEAR:1997#PUBMED:9342341#;Krawiec K, Kierdaszuk B, Shugar D.#TITLE:Inorganic tripolyphosphate (PPP(i)) as a phosphate donor for human deoxyribonucleoside kinases. #JOURNAL:Biochem Biophys Res Commun. #YEAR:2003#PUBMED:12535661#
596	DURIK1m	deoxyuridine kinase (ATP:Deoxyuridine), mitochondrial	Nucleotides		( 7084.1 )	0	1000	2	LOCUS:_7084#TRANSCRIPT:1#ABBREVIATION:TK2#ECNUMBERS:2.7.1.21#	Johansson M, Brismar S, Karlsson A.#TITLE:Human deoxycytidine kinase is located in the cell nucleus.#JOURNAL:Proc Natl Acad Sci U S A.#YEAR:1997#PUBMED:9342341#;Krawiec K, Kierdaszuk B, Shugar D.#TITLE:Inorganic tripolyphosphate (PPP(i)) as a phosphate donor for human deoxyribonucleoside kinases. #JOURNAL:Biochem Biophys Res Commun. #YEAR:2003#PUBMED:12535661#
597	DURIPP	deoxyuridine phosphorylase	Nucleotides		( 4860.1 ) or ( 151531.1 )	-1000	1000	4	JLR	Erion MD, Stoeckler JD, Guida WC, Walter RL, Ealick SE.#TITLE:Purine nucleoside phosphorylase. 2. Catalytic mechanism. #JOURNAL:Biochemistry#YEAR:1997#PUBMED:9305963#;Williams SR, Goddard JM, Martin DW Jr. #TITLE:Human purine nucleoside phosphorylase cDNA sequence and genomic clone characterization.#JOURNAL:Nucleic Acids Res.#YEAR:1984#PUBMED:6087295#;Russell RL, Cao D, Zhang D, Handschumacher RE…
598	DURItn	deoxyuridine transport in nucleus	Transport, Nuclear			-1000	1000	2	IT
599	DUTPDPm	dUTP diphosphatase	Nucleotides	3.6.1.23	( 1854.1 )	0	1000	4	LOCUS:_1854#TRANSCRIPT:1#ABBREVIATION:DUT#ECNUMBERS:3.6.1.23#	Tinkelenberg BA, Fazzone W, Lynch FJ, Ladner RD. #TITLE:Identification of sequence determinants of human nuclear dUTPase isoform localization.#JOURNAL:Exp Cell Res#YEAR:2003#PUBMED:12799180#;Cohen D, Heng HH, Shi XM, McIntosh EM, Tsui LC, Pearlman RE.#TITLE:Assignment of the human dUTPase gene (DUT) to chromosome 15q15-q21. 1 by fluorescence in situ hybridization. #JOURNAL:Genomics#YEAR:1997#PUBM…
600	DUTPDPn	dUTP diphosphatase, nuclear	Nucleotides	3.6.1.23	( 1854.1 )	0	1000	4	LOCUS:_1854#TRANSCRIPT:1#ABBREVIATION:DUT#ECNUMBERS:3.6.1.23#	Tinkelenberg BA, Fazzone W, Lynch FJ, Ladner RD. #TITLE:Identification of sequence determinants of human nuclear dUTPase isoform localization.#JOURNAL:Exp Cell Res#YEAR:2003#PUBMED:12799180#;Cohen D, Heng HH, Shi XM, McIntosh EM, Tsui LC, Pearlman RE.#TITLE:Assignment of the human dUTPase gene (DUT) to chromosome 15q15-q21. 1 by fluorescence in situ hybridization. #JOURNAL:Genomics#YEAR:1997#PUBM…
601	D_3AIBt	D-3-amino-isobutyrate transport	Transport, Extracellular			0	1000	2	MM
602	D_LACt2	D-lactate transport via proton symport	Transport, Extracellular		( 9194.1 ) or ( 23539.1 ) or ( 6566.1 ) or ( 9123.1 )	-1000	1000	4	JLR	Devlin, TM#TITLE:Textbook of Biochemistry with Clinical Correlations#YEAR:2001#;Lin RY, Vera JC, Chaganti RS, Golde DW#TITLE:Human monocarboxylate transporter 2 (MCT2) is a high affinity pyruvate transporter#JOURNAL:J Biol Chem#YEAR:1998#PUBMED:9786900#;Champe, P.C., Harvey, R.A., Ferrier D.R.#TITLE:Biochemistry, 3rd edition#YEAR:2005#;Halestrap AP, Price NT#TITLE:The proton-linked monocarboxylat…
603	EAFLATOXINte	xenobiotic transport	Transport, Extracellular			-1000	1000	2	unknown mechanism, related cyp P450 metabolism reactions NJ
604	EBASTINEOHte	xenobiotic transport	Transport, Extracellular			-1000	1000	2	unknown mechanism, related cyp P450 metabolism reactions NJ
605	EBASTINEOHtr	xenobiotic transport	Transport, Endoplasmic Reticular			-1000	1000	0	unknown mechanism, related cyp P450 metabolism reactions NJ
606	EBASTINEte	xenobiotic transport	Transport, Extracellular			-1000	1000	2	unknown mechanism, related cyp P450 metabolism reactions NJ
607	EBASTINEtr	xenobiotic transport	Transport, Endoplasmic Reticular			-1000	1000	2	unknown mechanism, related cyp P450 metabolism reactions NJ
608	EBP2r	3-beta-hydroxysteroid-delta(8),delta(7)-isomerase	Cholesterol Metabolism	5.3.3.5	( 10682.1 )	0	1000	4	involved in lanosterol -&gt; cholesterol pathway NJ	Marijanovic Z, Laubner D, Moller G, Gege C, Husenn B, Adamski J, Breitling R#TITLE:Closing the gap: Identification of human 3-ketosteroid reductase, the last unknown enzyme of mammalian cholesterol biosynthesis#JOURNAL:Molecular Endocrinology#YEAR:2005#;Braverman N, Lin P, Moebius FF, Obie C, Moser A, Glossmann H, Wilcox WR, Rimoin DL, Smith M, Kratz L, Kelley RI, Valle D#TITLE:Mutations in the g…
609	ECOAH12m	3-hydroxyacyl-CoA dehydratase (3-hydroxyisobutyryl-CoA) (mitochondria)	Valine, Leucine, and Isoleucine Metabolism	4.2.1.17	( 1892.1 ) or ( 3030.1 ) and ( 3032.1 )	-1000	1000	2	MM	Sweetman, L, Williams, JC#TITLE:Branched chain organic acidurias#JOURNAL:The Metabolic and Molecular Bases of Inherited Disease, 8th ed (Scriver CR, et al., editors)#YEAR:2001#
610	ECOAH1m	3-hydroxyacyl-CoA dehydratase (3-hydroxybutanoyl-CoA) (mitochondria)	Tryptophan metabolism	4.2.1.17	( 549.1 ) or ( 3030.1 ) and ( 3032.1 ) or ( 1892.1 )	-1000	1000	2	SAB for mito	FitzPatrick DR, Germain-Lee E, Valle D.#TITLE:Isolation and characterization of rat and human cDNAs encoding a novel putative peroxisomal enoyl-CoA hydratase. #YEAR:1995#PUBMED:7558027#
611	ECOAH9m	2-Methylprop-2-enoyl-CoA (2-Methylbut-2-enoyl-CoA), mitochondrial	Valine, Leucine, and Isoleucine Metabolism	4.2.1.17	( 1892.1 ) or ( 3030.1 ) and ( 3032.1 )	-1000	1000	2	MM	Sweetman, L, Williams, JC#TITLE:Branched chain organic acidurias#JOURNAL:The Metabolic and Molecular Bases of Inherited Disease, 8th ed (Scriver CR, et al., editors)#YEAR:2001#
612	EHGLAT2m	L-erythro-4-Hydroxyglutamate:2-oxoglutarate aminotransferase 2, mitochondrial	Arginine and Proline Metabolism	2.6.1.21	( 2806.1 )	0	1000	2	NCD SAB oaa -&gt; asp-L	Takayama T, Fujita K, Suzuki K, Sakaguchi M, Fujie M, Nagai E, Watanabe S, Ichiyama A, Ogawa Y#TITLE:Control of oxalate formation from L-hydroxyproline in liver mitochondria#JOURNAL:J Am Soc Nephrol#YEAR:2003#PUBMED:12660328#;Knight J, Holmes RP#TITLE:Mitochondrial hydroxyproline metabolism: implications for primary hyperoxaluria#JOURNAL:Am J Nephrol#YEAR:2005#PUBMED:15849464#
613	EHGLATm	L-erythro-4-Hydroxyglutamate:2-oxoglutarate aminotransferase, mitochondrial	Arginine and Proline Metabolism	2.6.1.1	( 2806.1 )	-564.809	1000	1	NCD	Knight J, Holmes RP#TITLE:Mitochondrial hydroxyproline metabolism: implications for primary hyperoxaluria#JOURNAL:Am J Nephrol#YEAR:2005#PUBMED:15849464#
614	EICOSTETCPT1	carnitine O-palmitoyltransferase	Carnitine shuttle	2.3.1.21	( 1375.1 ) or ( 1375.3 ) or ( 1375.4 ) or ( 126129.1 ) or ( 1374.1 ) or ( 1375.2 )	0	1000	4	NJ
615	EICOSTETCPT2	carnitine transferase	Carnitine shuttle		( 1376.1 )	0	1000	4	NJ
616	EICOSTETCRNt	transport into the mitochondria (carnitine)	Carnitine shuttle		( 788.1 )	0	1000	4	NJ
617	EICOSTETt	fatty acid transport via diffusion	Transport, Extracellular			-1000	1000	2	NJ	Schaffer JE.#TITLE:Fatty acid transport: the roads taken.#JOURNAL:Am J Physiol Endocrinol Metab.#YEAR:2002#PUBMED:11788354#;Pownall HJ, Hamilton JA.#TITLE:Energy translocation across cell membranes and membrane models.#JOURNAL:Acta Physiol Scand#YEAR:2003#PUBMED:12864740#
618	ELAIDCPT1	carnitine O-palmitoyltransferase	Carnitine shuttle	2.3.1.21	( 1375.1 ) or ( 1375.3 ) or ( 1375.4 ) or ( 126129.1 ) or ( 1374.1 ) or ( 1375.2 )	0	1000	4	NJ
619	ELAIDCPT2	carnitine transferase	Carnitine shuttle		( 1376.1 )	0	1000	4	NJ
620	ELAIDCRNt	transport into the mitochondria (carnitine)	Carnitine shuttle		( 788.1 )	0	1000	4	NJ
621	ENGASE	endo-beta-N-acetylglucosaminidase	N-Glycan Degradation	3.2.1.96	( 64772.1 )	0	1000	0	NCD	Suzuki T, Yano K, Sugimoto S, Kitajima K, Lennarz WJ, Inoue S, Inoue Y, Emori Y#TITLE:Endo-beta-N-acetylglucosaminidase, an enzyme involved in processing of free oligosaccharides in the cytosol#JOURNAL:Proc Natl Acad Sci U S A#YEAR:2002#PUBMED:12114544#
622	ENGASE2	endo-beta-N-acetylglucosaminidase	N-Glycan Degradation	3.2.1.96	( 64772.1 )	0	1000	0	NCD	Suzuki T, Yano K, Sugimoto S, Kitajima K, Lennarz WJ, Inoue S, Inoue Y, Emori Y#TITLE:Endo-beta-N-acetylglucosaminidase, an enzyme involved in processing of free oligosaccharides in the cytosol#JOURNAL:Proc Natl Acad Sci U S A#YEAR:2002#PUBMED:12114544#
623	ENGASE3ly	endo-beta-N-acetylglucosaminidase, lysosomal	Keratan sulfate degradation	3.2.1.96		0	1000	0	NCD
624	ENGASEly	endo-beta-N-acetylglucosaminidase, lysosomal	N-Glycan Degradation	3.2.1.96		0	1000	0	NCD
625	ENMAN3g	Endomannosidase (glc3man-producing), Golgi apparatus	N-Glycan Biosynthesis			0	1000	0	NCD	Spiro RG#TITLE:Glucose residues as key determinants in the biosynthesis and quality control of glycoproteins with N-linked oligosaccharides.#JOURNAL:J Biol Chem#YEAR:2000#PUBMED:11007802#;Roth J, Ziak M, Zuber C.#TITLE:The role of glucosidase II and endomannosidase in glucose trimming of asparagine-linked oligosaccharides.#JOURNAL:Biochimie#YEAR:2003#PUBMED:12770767#
626	ENMAN5g	Endomannosidase (m6masnB2-producing), Golgi apparatus	N-Glycan Biosynthesis			0	1000	0	NCD
627	ENO	enolase	Glycolysis/Gluconeogenesis	4.2.1.11	( 2023.1 ) or ( 2027.2 ) or ( 2027.1 ) or ( 2026.1 )	-171.068	0	0	SMP
628	ESTRADIOLGLCt	estradiol glucuronide transport via bicarbonate countertransport	Transport, Extracellular		( 28234.1 ) or ( 28231.1 ) or ( 10599.1 ) or ( 6579.1 ) or ( 53919.1 )	-1000	1000	4	NJ	Kullak-Ublick GA, Beuers U, Meier PJ, Domdey H, Paumgartner G.#TITLE:Assignment of the human organic anion transporting polypeptide (OATP) gene to chromosome 12p12 by fluorescence in situ hybridization.#JOURNAL:J Hepatol.#YEAR:1996#PUBMED:9007731#;Hagenbuch B, Meier PJ.#TITLE:The superfamily of organic anion transporting polypeptides.#JOURNAL:Biochim Biophys Acta.#YEAR:2003#PUBMED:12507753#;Satli…
629	ESTRADIOLGLCt2	17-beta-D-glucuronide transport (ATP-dependent)	Transport, Extracellular		( 10257.1 )	0	1000	4	IT	Chen ZS, Lee K, Kruh GD.#TITLE:Transport of cyclic nucleotides and estradiol 17-beta-D-glucuronide by multidrug resistance protein 4. Resistance to 6-mercaptopurine and 6-thioguanine.#JOURNAL:J Biol Chem. #YEAR:2001#PUBMED:11447229#;Reid G, Wielinga P, Zelcer N, van der Heijden I, Kuil A, de Haas M, Wijnholds J, Borst P. #TITLE:The human multidrug resistance protein MRP4 functions as a prostaglan…
630	ESTRADIOLtr	estradiol intracellular transport	Transport, Endoplasmic Reticular			-1000	1000	2	specific mechanism not known, proton dependence for trans-mit transport has been suggested, however directionality and stoichiometry has not yet been elucidated. see PMID: 12770731 and others NJ
631	ESTRONEGLCt	ABC transporter	Transport, Extracellular		( 8714.1 ) or ( 8714.3 ) or ( 8714.2 )	0	1000	4	for bile acid secretion into bile NJ	Kiuchi Y, Suzuki H, Hirohashi T, Tyson CA, Sugiyama Y.#TITLE:cDNA cloning and inducible expression of human multidrug resistance associated protein 3 (MRP3).#JOURNAL:FEBS Lett.#YEAR:1998#PUBMED:9738950#;Uchiumi T, Hinoshita E, Haga S, Nakamura T, Tanaka T, Toh S, Furukawa M, Kawabe T, Wada M, Kagotani K, Okumura K, Kohno K, Akiyama S, Kuwano M.#TITLE:Isolation of a novel human canalicular multisp…
632	ESTRONEGLCtr	glucuronidated compound transport	Transport, Endoplasmic Reticular			-1000	1000	2	unknown mechanism, however glucuronidated metabolites need to get out of the cell NJ
633	ESTRONESt	estrone 3-sulfate transport via bicarbonate countertransport	Transport, Extracellular		( 11309.1 ) or ( 10599.1 ) or ( 53919.1 ) or ( 6579.1 ) or ( 28232.1 ) or ( 28231.1 ) or ( 28234.1 )	-1000	1000	4	NJ	Kullak-Ublick GA, Beuers U, Meier PJ, Domdey H, Paumgartner G.#TITLE:Assignment of the human organic anion transporting polypeptide (OATP) gene to chromosome 12p12 by fluorescence in situ hybridization.#JOURNAL:J Hepatol.#YEAR:1996#PUBMED:9007731#;Hagenbuch B, Meier PJ.#TITLE:The superfamily of organic anion transporting polypeptides.#JOURNAL:Biochim Biophys Acta.#YEAR:2003#PUBMED:12507753#;Satli…
634	ESTRONEtr	estrone intracellular transport	Transport, Endoplasmic Reticular			-1000	1000	2	specific mechanism not known, proton dependence for trans-mit transport has been suggested, however directionality and stoichiometry has not yet been elucidated. see PMID: 12770731 and others NJ
635	ESTSULT	Estrogen sulfotransferase	Steroid Metabolism	2.8.2.4	( 6783.1 ) or ( 6817.4 ) or ( 6817.1 ) or ( 6817.3 ) or ( 6817.2 ) or ( 6817.5 )	0	1000	4	NJ	Aksoy IA, Wood TC, Weinshilboum R.#TITLE:Human liver estrogen sulfotransferase: identification by cDNA cloning and expression.#JOURNAL:Biochem Biophys Res Commun#YEAR:1994#PUBMED:8185618#;Glatt H, Boeing H, Engelke CE, Ma L, Kuhlow A, Pabel U, Pomplun D, Teubner W, Meinl W.#TITLE:Human cytosolic sulphotransferases: genetics, characteristics, toxicological aspects.#JOURNAL:Mutat Res#YEAR:2001#PUBM…
636	ETF	electron transfer flavoprotein	Fatty acid oxidation		( 2109.2 ) and ( 2108.1 ) or ( 2109.1 ) and ( 2108.1 )	0	1000	4	TV (5/4/05) Voet p.571	Finocchiaro G, Ito M, Ikeda Y, Tanaka K.#TITLE:Molecular cloning and nucleotide sequence of cDNAs encoding the alpha-subunit of human electron transfer flavoprotein.#JOURNAL:J Biol Chem#YEAR:1988#PUBMED:3170610#;Thorpe C, Kim JJ.#TITLE:Structure and mechanism of action of the acyl-CoA dehydrogenases.#JOURNAL:FASEB J#YEAR:1995#PUBMED:7601336#
637	ETFQO	Electron transfer flavoprotein-ubiquinone oxidoreductase	Fatty acid oxidation	1.5.5.1	( 2110.1 )	0	1000	4	TV Ruzicka F, JBC, 1977	Simkovic M, Degala GD, Eaton SS, Frerman FE.#TITLE:Expression of human electron transfer flavoprotein-ubiquinone oxidoreductase from a baculovirus vector: kinetic and spectral characterization of the human protein.#JOURNAL:Biochem J#YEAR:2002#PUBMED:12049629#;Spector EB, Seltzer WK, Goodman SI.#TITLE:Assignment of electron transfer flavoprotein-ubiquinone oxidoreductase (ETF-QO) to human chromoso…
638	ETHAK	Ethanolamine kinase	Glycerophospholipid Metabolism	2.7.1.82	( 1119.2 ) or ( 55500.1 ) or ( 1119.1 ) or ( 55224.1 )	0	1000	4	NCD	Voet D, Voet JG#TITLE:Biochemistry#YEAR:1995#;Kent C#TITLE:Eukaryotic phospholipid biosynthesis#JOURNAL:Annu Rev Biochem#YEAR:1995#
639	ETOHt	ethanol reversible transport	Transport, Extracellular			-1000	1000	4	NCD
640	EX_10fthf7glu(e)	10-formyltetrahydrofolate-[Glu](7) exchange	Miscellaneous			0	0	0	none
641	EX_10fthf(e)	10-Formyltetrahydrofolate exchange	Miscellaneous			0	0	0	none
642	EX_1glyc_hs(e)	1 acyl phosphoglycerol exchange	Miscellaneous			0	0	0	none
643	EX_1mncam(e)	1-Methylnicotinamide exchange	Miscellaneous			0	0	0	none
644	EX_2425dhvitd2(e)	24R,25-Dihyoxyvitamin D2 exchange	Miscellaneous			0	0	0	none
645	EX_2425dhvitd3(e)	24R,25-Dihydroxyvitamin D3 exchange	Miscellaneous			0	0	0	none
646	EX_25hvitd2(e)	25-Hydroxyvitamin D2 exchange	Miscellaneous			0	0	0	none
647	EX_2hb(e)	2-Hydroxybutyrate exchange	Miscellaneous			0	0	0	none
648	EX_2mcit(e)	2-Methylcitrate exchange	Miscellaneous			0	0	0	none
649	EX_34dhoxpeg(e)	3,4-Dihydroxyphenylethyleneglycol exchange	Miscellaneous			0	0	0	none
650	EX_34dhphe(e)	3,4-Dihydroxy-L-phenylalanine exchange	Miscellaneous			0	0	0	none
651	EX_35cgmp(e)	3',5'-Cyclic GMP exchange	Miscellaneous			0	0	0	none
652	EX_3aib_D(e)	D-3-Amino-isobutanoate exchange	Miscellaneous			0	0	0	none
653	EX_3aib(e)	L-3-Amino-isobutanoate exchange	Miscellaneous			0	0	0	none
654	EX_3mlda(e)	3-Methylimidazoleacetic acid exchange	Miscellaneous			0	0	0	none
655	EX_4hdebrisoquine(e)	4 hydroxy debrisoquine exchange	Miscellaneous			0	0	0	none
656	EX_4hphac(e)	4-Hydroxyphenylacetate exchange	Miscellaneous			0	0	0	none
657	EX_4nph(e)	4-Nitrophenol exchange	Miscellaneous			0	0	0	none
658	EX_4nphsf(e)	4-Nitrophenyl sulfate exchange	Miscellaneous			0	0	0	none
659	EX_5adtststerone(e)	5alpha-Dihydrotestosterone exchange	Miscellaneous			0	0	0	none
660	EX_5adtststeroneglc(e)	5alpha-Dihydrotestosterone glucuronide exchange	Miscellaneous			0	0	0	none
661	EX_5adtststerones(e)	5alpha-Dihydrotestosterone sulfate exchange	Miscellaneous			0	0	0	none
662	EX_5fthf(e)	5-Formyltetrahydrofolate exchange	Miscellaneous			0	0	0	none
663	EX_5htrp(e)	5-Hydroxy-L-tryptophan exchange	Miscellaneous			0	0	0	none
664	EX_7dhf(e)	heptaglutamyl folate (DHF) exchange	Miscellaneous			0	0	0	none
665	EX_7thf(e)	heptaglutamyl folate (THF) exchange	Miscellaneous			0	0	0	none
666	EX_Lcystin(e)	L-Cystine exchange	Miscellaneous			-0.70536	0	0	none
667	EX_ac(e)	Acetate exchange	Miscellaneous			0	0	0	none
668	EX_acac(e)	Acetoacetate exchange	Miscellaneous			0	0	0	none
669	EX_acetone(e)	Acetone exchange	Miscellaneous			0	0	0	none
670	EX_ach(e)	Acetylcholine exchange	Miscellaneous			0	0	0	none
671	EX_acn13acngalgbside_hs(e)	sialyl (1,3) sialyl (2,6) galactosylgloboside (homo sapiens) exchange	Miscellaneous			0	0	0	none
672	EX_acn23acngalgbside_hs(e)	sialyl (2,3) sialyl (2,6) galactosylgloboside (homo sapiens) exchange	Miscellaneous			0	0	0	none
673	EX_acnacngal14acglcgalgluside_hs(e)	3',8'-LD1 exchange	Miscellaneous			0	0	0	none
674	EX_acngalacglcgal14acglcgalgluside_hs(e)	VI3NeuAc-nLc6Cer exchange	Miscellaneous			0	0	0	none
675	EX_ade(e)	Adenine exchange	Miscellaneous			0.0098019	0.01198	0	none
676	EX_adn(e)	Adenosine exchange	Miscellaneous			97.2695	99.1342	0	none
677	EX_adp	adp exchange	Miscellaneous			0	0	0	TV
678	EX_adrn(e)	adrenic acid exchange	Miscellaneous			-10	10	0	none
679	EX_adrnl(e)	Adrenaline exchange	Miscellaneous			0	0	0	none
680	EX_aflatoxin(e)	aflatoxin B1 exchange	Miscellaneous			0	0	0	none
681	EX_ala_L(e)	L-Alanine exchange	Miscellaneous			-10	10	0	none
682	EX_andrstrn(e)	Androsterone exchange	Miscellaneous			0	0	0	none
683	EX_andrstrnglc(e)	androsterone glucuronide exchange	Miscellaneous			0	0	0	none
684	EX_arachd(e)	nC20:4 exchange	Miscellaneous			-10	10	0	none
685	EX_arg_L(e)	L-Arginine exchange	Miscellaneous			4.9515	26.5961	0	none
686	EX_asn_L(e)	L-Asparagine exchange	Miscellaneous			0	0	0	none
687	EX_asp_L(e)	L-Aspartate exchange	Miscellaneous			0	0	0	none
688	EX_atp(e)	ATP exchange	Miscellaneous			-93.4865	0	0	none
689	EX_bhb(e)	(R)-3-Hydroxybutanoate transport via H+ symport	Miscellaneous			0	0	0	IT
690	EX_bilirub(e)	Bilirubin exchange	Miscellaneous			0	0.26787	0	none
691	EX_but(e)	Butyrate (n-C4:0) exchange	Miscellaneous			0	0	0	none
692	EX_camp(e)	cAMP exchange	Miscellaneous			0	0	0	none
693	EX_cgly(e)	Cys-Gly exchange	Miscellaneous			0	0	0	none
694	EX_chol(e)	Choline exchange	Miscellaneous			1.1252	1.3752	0	none
695	EX_chsterol(e)	Cholesterol exchange	Miscellaneous			0	2.5485	0	none
696	EX_chtn(e)	chitin exchange	Miscellaneous			0	0	0	none
697	EX_co(e)	Carbon monoxide exchange	Miscellaneous			0	1000	0	none
698	EX_coumarin(e)	coumarin exchange	Miscellaneous			0	0	0	none
699	EX_creat(e)	Creatine exchange	Miscellaneous			0	0	0	none
700	EX_crmp_hs(e)	Ceramide 1-phosphate exchange	Miscellaneous			0	0	0	none
701	EX_crvnc(e)	nC22:6 exchange	Miscellaneous			-10	10	0	none
702	EX_csn(e)	Cytosine exchange	Miscellaneous			0	0	0	none
703	EX_cyan(e)	Hydrogen cyanide exchange	Miscellaneous			0	0	0	none
704	EX_cytd(e)	Cytidine exchange	Miscellaneous			-0.0013946	0.053278	0	none
705	EX_dad_2(e)	Deoxyadenosine exchange	Miscellaneous			0	0	0	none
706	EX_dcsptn1(e)	docosa-4,7,10,13,16-pentaenoic acid (n-6) exchange	Miscellaneous			1.3473e-12	1.7816e-12	0	none
707	EX_debrisoquine(e)	debrisoquine exchange	Miscellaneous			0	0	0	none
708	EX_dgchol(e)	Chenodeoxyglycocholate exchange	Miscellaneous			0	0	0	none
709	EX_dhf(e)	7,8-Dihydrofolate exchange	Miscellaneous			0	0	0	none
710	EX_dlnlcg(e)	dihomo-gamma-linolenic acid (n-6) exchange	Miscellaneous			-10	10	0	none
711	EX_dopa(e)	Dopamine exchange	Miscellaneous			0	0	0	none
712	EX_dopasf(e)	Dopamine 3-O-sulfate exchange	Miscellaneous			0	0	0	none
713	EX_eaflatoxin(e)	8,9 epxoy aflatoxin B1 exchange	Miscellaneous			0	0	0	none
714	EX_ebastine(e)	ebastine exchange	Miscellaneous			0	0	0	none
715	EX_ebastineoh(e)	hydroxylated ebastine exchange	Miscellaneous			0	0	0	none
716	EX_eicostet(e)	eicosatetranoic acid exchange	Miscellaneous			0	0	0	none
717	EX_estroneglc(e)	estrone glucuronide exchange	Miscellaneous			0	0	0	none
718	EX_estrones(e)	Estrone 3-sulfate exchange	Miscellaneous			0	0	0	none
719	EX_etoh(e)	Ethanol exchange	Miscellaneous			0	0	0	none
720	EX_fol(e)	Folate exchange	Miscellaneous			0	0	0	none
721	EX_fuc_L(e)	L-Fucose exchange	Miscellaneous			0	0	0	none
722	EX_gal(e)	D-Galactose exchange	Miscellaneous			0	0	0	none
723	EX_galacglcgalgbside_hs(e)	Gal-GlcNAc-Gal globoside (homo sapiens) exchange	Miscellaneous			0	0	0	none
724	EX_galgalgalthcrm_hs(e)	Gal-Gal-Gal-Gal-Gal-Glc-Cer (homo sapiens) exchange	Miscellaneous			0	0	0	none
725	EX_gam(e)	D-Glucosamine exchange	Miscellaneous			0	0	0	none
726	EX_gbside_hs(e)	globoside (homo sapiens) exchange	Miscellaneous			0	0	0	none
727	EX_gd1b2_hs(e)	GD1beta (homo sapiens) exchange	Miscellaneous			0	0	0	none
728	EX_gd1c_hs(e)	GD1c (homo sapiens) exchange	Miscellaneous			0	0	0	none
729	EX_gln_L(e)	L-Glutamine exchange	Miscellaneous			-0.0017275	-0.0015101	0	none
730	EX_glu_L(e)	L-Glutamate exchange	Miscellaneous			88.7917	96.9356	0	none
731	EX_gly(e)	Glycine exchange	Miscellaneous			39.1672	79.1624	0	none
732	EX_glyb(e)	Glycine betaine exchange	Miscellaneous			0	0	0	none
733	EX_glyc_S(e)	(S)-Glycerate exchange	Miscellaneous			0	0	0	none
734	EX_glygn2(e)	glycogen, structure 2 (glycogenin-1,6-{7[1,4-Glc], 4[1,4-Glc]}) exchange	Miscellaneous			0	0	0	none
735	EX_glygn5(e)	glycogen, structure 5 (glycogenin-2[1,4-Glc]) exchange	Miscellaneous			0	0	0	none
736	EX_gp1c_hs(e)	GP1c (homo sapiens) exchange	Miscellaneous			0	0	0	none
737	EX_gp1calpha_hs(e)	GP1c alpha (homo sapiens) exchange	Miscellaneous			0	0	0	none
738	EX_gq1b_hs(e)	GQ1b (homo sapiens) exchange	Miscellaneous			0	0	0	none
739	EX_gq1balpha_hs(e)	GQ1balpha (homo sapiens) exchange	Miscellaneous			0	0	0	none
740	EX_gt1a_hs(e)	GT1a (homo sapiens) exchange	Miscellaneous			0	0	0	none
741	EX_gthox(e)	Oxidized glutathione exchange	Miscellaneous			0	0	0	none
742	EX_gtp(e)	GTP exchange	Miscellaneous			0	0	0	none
743	EX_gua(e)	Guanine exchange	Miscellaneous			0	0	0	none
744	EX_ha(e)	hyaluronan exchange	Miscellaneous			0	0	0	none
745	EX_hcoumarin(e)	hydroxy coumarin exchange	Miscellaneous			0	0	0	none
746	EX_hdca(e)	Hexadecanoate (n-C16:0) exchange	Miscellaneous			-57.2108	-22.7582	0	none
747	EX_hestratriol(e)	4,17 dihydroxy estradiol exchange	Miscellaneous			0	0	0	none
748	EX_hexc(e)	hexacosanoate (n-C26:0) exchange	Miscellaneous			0	0	0	none
749	EX_his_L(e)	L-Histidine exchange	Miscellaneous			-10	10	0	none
750	EX_hista(e)	Histamine exchange	Miscellaneous			0	0	0	none
751	EX_hpdca(e)	heptadecanoate exchange	Miscellaneous			0	0	0	none
752	EX_hxan(e)	Hypoxanthine exchange	Miscellaneous			-0.0014826	-0.0012262	0	none
753	EX_i(e)	Iodide exchange	Miscellaneous			-1000	1000	0	none
754	EX_idp(e)	IDP exchange	Miscellaneous			0	0	0	none
755	EX_ile_L(e)	L-Isoleucine exchange	Miscellaneous			-75.9306	-30.1797	0	none
756	EX_imp(e)	IMP exchange	Miscellaneous			0	0	0	none
757	EX_inost(e)	myo-Inositol exchange	Miscellaneous			-0.00055874	0	0	none
758	EX_ksi(e)	keratan sulfate I exchange	Miscellaneous			-0.01099	0	0	none
759	EX_ksii_core2(e)	keratan sulfate II (core 2-linked) exchange	Miscellaneous			-0.0027217	0	0	none
760	EX_ksii_core4(e)	keratan sulfate II (core 4-linked) exchange	Miscellaneous			-0.019257	0	0	none
761	EX_lac_D(e)	D-lactate exchange	Miscellaneous			0	0	0	JLR
762	EX_leu_L(e)	L-Leucine exchange	Miscellaneous			-0.014364	0.13658	0	none
763	EX_leuktrC4(e)	Leukotriene C4 exchange	Miscellaneous			0	0	0	none
764	EX_lgnc(e)	lignoceric acid exchange	Miscellaneous			0	0	0	none
765	EX_lnlc(e)	linoleic acid (all cis C18:2) exchange	Miscellaneous			-10	10	0	none
766	EX_lnlnca(e)	alpha-Linolenic acid exchange	Miscellaneous			-10	10	0	none
767	EX_lpchol_hs(e)	lysophosphatidylcholine (homo sapiens) exchange	Miscellaneous			0	0	0	none
768	EX_lys_L(e)	L-Lysine exchange	Miscellaneous			-11.5228	21.872	0	none
769	EX_malt(e)	Maltose exchange	Miscellaneous			0	0	0	none
770	EX_meoh(e)	methanol exchange	Miscellaneous			0	30.7536	0	none
771	EX_mercplaccys(e)	3-mercaptolactate-cysteine disulfide exchange	Miscellaneous			0	0	0	none
772	EX_met_L(e)	L-Methionine exchange	Miscellaneous			-0.0036681	-0.0005835	0	none
773	EX_n2m2nmasn(e)	N-Acetyl-beta-D-glucosaminyl-1,2-alpha-D-mannosyl-1,3-(N-acetyl-beta-D-glucosaminyl-1,2-alpha-D-mannosyl-1,6)-(N-acetyl-beta-D-glucosaminyl-1,4)-beta-D-mannosyl-1,4-N-acetyl-beta-D-glucosaminyl-R exchange	Miscellaneous			0	0	0	none
774	EX_no(e)	Nitric oxide exchange	Miscellaneous			-1000	1000	0	none
775	EX_npthl(e)	Naphthalene exchange	Miscellaneous			0	0	0	none
776	EX_nrpphr(e)	Norepinephrine exchange	Miscellaneous			0	0	0	none
777	EX_nrpphrsf(e)	Sulfate derivative of norepinephrine exchange	Miscellaneous			0	0	0	none
778	EX_nrvnc(e)	nervonic acid exchange	Miscellaneous			0	0	0	none
779	EX_oagd3_hs(e)	9-O-Acetylated GD3 (homo sapiens) exchange	Miscellaneous			0	0	0	none
780	EX_oagt3_hs(e)	9-O-Acetylated GT3 (homo sapiens) exchange	Miscellaneous			0	0	0	none
781	EX_ocdca(e)	octadecanoate (n-C18:0) exchange	Miscellaneous			-10	10	0	none
782	EX_ocdcea(e)	octadecenoate (n-C18:1) exchange	Miscellaneous			0	0	0	none
783	EX_octa(e)	octanoate (n-C8:0) exchange	Miscellaneous			0	0	0	none
784	EX_onpthl(e)	naphthalene epoxide exchange	Miscellaneous			0	0	0	none
785	EX_orn(e)	Ornithine exchange	Miscellaneous			0	0	0	none
786	EX_oxa(e)	Oxalate exchange	Miscellaneous			0	0	0	none
787	EX_pchol_hs(e)	Phosphatidylcholine (homo sapiens) exchange	Miscellaneous			-0.0045135	0	0	none
788	EX_pe_hs(e)	phosphatidylethanolamine (homo sapiens) exchange	Miscellaneous			-0.0014583	0	0	none
789	EX_pglyc_hs(e)	phosphatidylglycerol (homo sapiens) exchange	Miscellaneous			-0.00034922	0	0	none
790	EX_phe_L(e)	L-Phenylalanine exchange	Miscellaneous			-10	10	0	none
791	EX_pheacgln(e)	alpha-N-Phenylacetyl-L-glutamine exchange	Miscellaneous			0	0	0	none
792	EX_pnto_R(e)	(R)-Pantothenate exchange	Miscellaneous			0	5.3966	0	none
793	EX_ppa(e)	Propionate exchange	Miscellaneous			0	0	0	none
794	EX_pro_D(e)	D-Proline exchange	Miscellaneous			0	0	0	none
795	EX_pro_L(e)	L-Proline exchange	Miscellaneous			-10	10	0	none
796	EX_prostgd2(e)	Prostaglandin D2 exchange	Miscellaneous			-1000	1000	0	none
797	EX_prostge2(e)	Prostaglandin E2 exchange	Miscellaneous			-0.00043852	0.044173	0	none
798	EX_prostgf2(e)	Prostaglandin F2alpha exchange	Miscellaneous			0	0	0	none
799	EX_ps_hs(e)	phosphatidylserine (homo sapiens) exchange	Miscellaneous			0	0	0	none
800	EX_ptdca(e)	pentadecanoate exchange	Miscellaneous			0	0	0	none
801	EX_s2l2n2m2masn(e)	de-Fuc form of PA6 exchange	Miscellaneous			0	0	0	none
802	EX_ser_L(e)	L-Serine exchange	Miscellaneous			-4.6074	22.8413	0	none
803	EX_sl_L(e)	L-sulfolactate exchange	Miscellaneous			0	0	0	none
804	EX_so4(e)	Sulfate exchange	Miscellaneous			-1000	1000	0	none
805	EX_sph1p(e)	Sphinganine 1-phosphate exchange	Miscellaneous			0	0	0	none
806	EX_sphs1p(e)	Sphingosine 1-phosphate exchange	Miscellaneous			-29.3182	-28.9673	0	none
807	EX_strch1(e)	starch, structure 1 (1,6-{7[1,4-Glc], 4[1,4-Glc]}) exchange	Miscellaneous			0	0	0	none
808	EX_strdnc(e)	stearidonic acid exchange	Miscellaneous			0	0	0	none
809	EX_succ(e)	Succinate exchange	Miscellaneous			-10	10	0	none
810	EX_sucr(e)	Sucrose exchange	Miscellaneous			0	0	0	none
811	EX_tag_hs(e)	triacylglycerol (homo sapiens) exchange	Miscellaneous			0	0	0	none
812	EX_tagat_D(e)	D-Tagatose exchange	Miscellaneous			0	0	0	none
813	EX_taur(e)	Taurine exchange	Miscellaneous			0.039175	0.04788	0	none
814	EX_tchola(e)	Taurocholic acid exchange	Miscellaneous			0	6.3884	0	none
815	EX_tcynt(e)	Thiocyanate exchange	Miscellaneous			0	0	0	none
816	EX_tdchola(e)	taurochenodeoxycholate exchange	Miscellaneous			0	0	0	none
817	EX_tetpent3(e)	tetracosapentaenoic acid, n-3 exchange	Miscellaneous			0	0	0	none
818	EX_tetpent6(e)	tetracosapentaenoic acid, n-6 exchange	Miscellaneous			0	0	0	none
819	EX_tettet6(e)	tetracosatetraenoic acid n-6 exchange	Miscellaneous			0	0	0	none
820	EX_thm(e)	Thiamin exchange	Miscellaneous			-0.0052462	-0.0042924	0	none
821	EX_thmmp(e)	Thiamin monophosphate exchange	Miscellaneous			0	0	0	none
822	EX_thmtp(e)	Thiamin triphosphate exchange	Miscellaneous			0	0.0043353	0	none
823	EX_thr_L(e)	L-Threonine exchange	Miscellaneous			-0.31696	-0.31396	0	none
824	EX_thym(e)	Thymine exchange	Miscellaneous			0	0	0	none
825	EX_thymd(e)	Thymidine exchange	Miscellaneous			-0.00031372	0	0	none
826	EX_thyox_L(e)	L-Thyroxine exchange	Miscellaneous			0	0	0	none
827	EX_triodthysuf(e)	Triiodothyronine sulfate exchange	Miscellaneous			0	0	0	none
828	EX_trp_L(e)	L-Tryptophan exchange	Miscellaneous			-10	10	0	none
829	EX_tsul(e)	Thiosulfate exchange	Miscellaneous			0	0	0	none
830	EX_ttdca(e)	tetradecanoate (n-C14:0) exchange	Miscellaneous			0	0	0	none
831	EX_txa2(e)	Thromboxane A2 exchange	Miscellaneous			0	0	0	none
832	EX_tymsf(e)	Tyramine O-sulfate exchange	Miscellaneous			0	0	0	none
833	EX_tyr_L(e)	L-Tyrosine exchange	Miscellaneous			-10	10	0	none
834	EX_ura(e)	Uracil exchange	Miscellaneous			0	0	0	none
835	EX_urate(e)	Urate exchange	Miscellaneous			-38.8448	0.18599	0	none
836	EX_urea(e)	Urea exchange	Miscellaneous			0	1000	0	none
837	EX_utp(e)	UTP exchange	Miscellaneous			0	0	0	none
838	EX_val_L(e)	L-Valine exchange	Miscellaneous			-3.7343	44.734	0	none
839	EX_vitd3(e)	Vitamin D3 exchange	Miscellaneous			0	0	0	none
840	EX_xolest_hs(e)	cholesterol ester exchange	Miscellaneous			0	10.5203	0	none
841	EX_xyl_D(e)	D-Xylose exchange	Miscellaneous			0	0	0	none
842	FACOAL140i	fatty-acid--CoA ligase (tetradecanoate)	Fatty acid activation	6.2.1.3	( 2181.1 )	0	1000	4	JLR
843	FACOAL150	fatty-acid--CoA ligase	Fatty acid activation	6.2.1.3	( 22305.2 ) or ( 2182.1 ) or ( 2180.1 ) or ( 2181.2 ) or ( 2181.1 ) or ( 22305.1 )	-1000	1000	4	AR	Mashek DG, Bornfeldt KE, Coleman RA, Berger J, Bernlohr DA, Black P, DiRusso CC, Farber SA, Guo W, Hashimoto N, Khodiyar V, Kuypers FA, Maltais LJ, Nebert DW, Renieri A, Schaffer JE, Stahl A, Watkins PA, Vasiliou V, Yamamoto TT.#TITLE:Revised nomenclature for the mammalian long-chain acyl-CoA synthetase gene family.#JOURNAL:J Lipid Res#YEAR:2004#PUBMED:15292367#;Reich, Sel&apos;kov#TITLE:Energy m…
844	FACOAL160i	C160 fatty acid activation	Fatty acid activation	6.2.1.3	( 2181.2 ) or ( 22305.2 ) or ( 51703.1 ) or ( 22305.1 ) or ( 2180.1 ) or ( 2181.1 )	0	1000	4	TV catalyzed by acyl-CoA synthetases	Stanczak H, Stanczak JJ, Singh I.#TITLE:Chromosomal localization of the human gene for palmitoyl-CoA ligase (FACL1).#JOURNAL:Cytogenet Cell Genet.#YEAR:1992#PUBMED:1531127#
845	FACOAL170	fatty-acid--CoA ligase	Fatty acid activation	6.2.1.3	( 22305.2 ) or ( 2182.1 ) or ( 2180.1 ) or ( 2181.2 ) or ( 2181.1 ) or ( 22305.1 )	-1000	1000	4	AR	Mashek DG, Bornfeldt KE, Coleman RA, Berger J, Bernlohr DA, Black P, DiRusso CC, Farber SA, Guo W, Hashimoto N, Khodiyar V, Kuypers FA, Maltais LJ, Nebert DW, Renieri A, Schaffer JE, Stahl A, Watkins PA, Vasiliou V, Yamamoto TT.#TITLE:Revised nomenclature for the mammalian long-chain acyl-CoA synthetase gene family.#JOURNAL:J Lipid Res#YEAR:2004#PUBMED:15292367#;Reich, Sel&apos;kov#TITLE:Energy m…
846	FACOAL180i	C180 fatty acid activation	Fatty acid activation	6.2.1.3	( 22305.2 ) or ( 2181.2 ) or ( 51703.1 ) or ( 2181.1 ) or ( 2180.1 ) or ( 22305.1 )	0	1000	4	TV catalyzed by acyl-CoA synthetases
847	FACOAL181i	C181 fatty acid activation	Fatty acid activation	6.2.1.3	( 2180.1 ) or ( 2181.2 ) or ( 2181.1 )	0	1000	4	TV catalyzed by acyl-CoA synthetases
848	FACOAL1832	fatty-acid--CoA ligase	Fatty acid activation	6.2.1.3	( 2180.1 )	-1000	1000	4	NJ	Mashek DG, Bornfeldt KE, Coleman RA, Berger J, Bernlohr DA, Black P, DiRusso CC, Farber SA, Guo W, Hashimoto N, Khodiyar V, Kuypers FA, Maltais LJ, Nebert DW, Renieri A, Schaffer JE, Stahl A, Watkins PA, Vasiliou V, Yamamoto TT.#TITLE:Revised nomenclature for the mammalian long-chain acyl-CoA synthetase gene family.#JOURNAL:J Lipid Res#YEAR:2004#PUBMED:15292367#;Reich, Sel&apos;kov#TITLE:Energy m…
849	FACOAL191	fatty-acid--CoA ligase	Fatty acid activation	6.2.1.3	( 11001.1 )	0	1000	4	current models suggest COAL activity occurs on outer peroxisomal membrane NJ	Steinberg SJ, Wang SJ, Kim DG, Mihalik J, Watkins PA#TITLE:Human very-long-chain-acyl-CoA synthetase#JOURNAL:Biochemical and biophysical research communications#YEAR:1999#;Verhoeven NM, Jakobs C.#TITLE:Human metabolism of phytanic acid and pristanic acid.#JOURNAL:Prog Lipid Res#YEAR:2001#PUBMED:11591435#
850	FACOAL200	fatty-acid--CoA ligase	Fatty acid activation	6.2.1.3	( 2180.1 )	-1000	1000	4	NJ	Mashek DG, Bornfeldt KE, Coleman RA, Berger J, Bernlohr DA, Black P, DiRusso CC, Farber SA, Guo W, Hashimoto N, Khodiyar V, Kuypers FA, Maltais LJ, Nebert DW, Renieri A, Schaffer JE, Stahl A, Watkins PA, Vasiliou V, Yamamoto TT.#TITLE:Revised nomenclature for the mammalian long-chain acyl-CoA synthetase gene family.#JOURNAL:J Lipid Res#YEAR:2004#PUBMED:15292367#;Reich, Sel&apos;kov#TITLE:Energy m…
851	FACOAL203	fatty-acid--CoA ligase	Fatty acid activation	6.2.1.3	( 2180.1 )	-1000	1000	4	NJ	Mashek DG, Bornfeldt KE, Coleman RA, Berger J, Bernlohr DA, Black P, DiRusso CC, Farber SA, Guo W, Hashimoto N, Khodiyar V, Kuypers FA, Maltais LJ, Nebert DW, Renieri A, Schaffer JE, Stahl A, Watkins PA, Vasiliou V, Yamamoto TT.#TITLE:Revised nomenclature for the mammalian long-chain acyl-CoA synthetase gene family.#JOURNAL:J Lipid Res#YEAR:2004#PUBMED:15292367#;Reich, Sel&apos;kov#TITLE:Energy m…
852	FACOAL2042	fatty-acid--CoA ligase	Fatty acid activation	6.2.1.3	( 2180.1 )	-1000	1000	4	rev version so additional rxn doesn&apos;t need to be added to &quot;unload&quot; AA alternate to arachidonic acid (n-3 rather than n-6) NJ	Mashek DG, Bornfeldt KE, Coleman RA, Berger J, Bernlohr DA, Black P, DiRusso CC, Farber SA, Guo W, Hashimoto N, Khodiyar V, Kuypers FA, Maltais LJ, Nebert DW, Renieri A, Schaffer JE, Stahl A, Watkins PA, Vasiliou V, Yamamoto TT.#TITLE:Revised nomenclature for the mammalian long-chain acyl-CoA synthetase gene family.#JOURNAL:J Lipid Res#YEAR:2004#PUBMED:15292367#;Reich, Sel&apos;kov#TITLE:Energy m…
853	FACOAL224	fatty-acid--CoA ligase	Fatty acid activation	6.2.1.3	( 2180.1 )	-1000	1000	4	NJ	Mashek DG, Bornfeldt KE, Coleman RA, Berger J, Bernlohr DA, Black P, DiRusso CC, Farber SA, Guo W, Hashimoto N, Khodiyar V, Kuypers FA, Maltais LJ, Nebert DW, Renieri A, Schaffer JE, Stahl A, Watkins PA, Vasiliou V, Yamamoto TT.#TITLE:Revised nomenclature for the mammalian long-chain acyl-CoA synthetase gene family.#JOURNAL:J Lipid Res#YEAR:2004#PUBMED:15292367#;Reich, Sel&apos;kov#TITLE:Energy m…
854	FACOAL2251	fatty-acid--CoA ligase	Fatty acid activation	6.2.1.3	( 2180.1 )	-1000	1000	4	NJ	Mashek DG, Bornfeldt KE, Coleman RA, Berger J, Bernlohr DA, Black P, DiRusso CC, Farber SA, Guo W, Hashimoto N, Khodiyar V, Kuypers FA, Maltais LJ, Nebert DW, Renieri A, Schaffer JE, Stahl A, Watkins PA, Vasiliou V, Yamamoto TT.#TITLE:Revised nomenclature for the mammalian long-chain acyl-CoA synthetase gene family.#JOURNAL:J Lipid Res#YEAR:2004#PUBMED:15292367#;Reich, Sel&apos;kov#TITLE:Energy m…
855	FACOAL226	fatty-acid--CoA ligase	Fatty acid activation	6.2.1.3	( 2180.1 )	0	0	4	NJ	Mashek DG, Bornfeldt KE, Coleman RA, Berger J, Bernlohr DA, Black P, DiRusso CC, Farber SA, Guo W, Hashimoto N, Khodiyar V, Kuypers FA, Maltais LJ, Nebert DW, Renieri A, Schaffer JE, Stahl A, Watkins PA, Vasiliou V, Yamamoto TT.#TITLE:Revised nomenclature for the mammalian long-chain acyl-CoA synthetase gene family.#JOURNAL:J Lipid Res#YEAR:2004#PUBMED:15292367#;Reich, Sel&apos;kov#TITLE:Energy m…
856	FACOAL240	fatty-acid--CoA ligase	Fatty acid activation	6.2.1.3	( 2180.1 )	-1000	1000	4	NJ	Mashek DG, Bornfeldt KE, Coleman RA, Berger J, Bernlohr DA, Black P, DiRusso CC, Farber SA, Guo W, Hashimoto N, Khodiyar V, Kuypers FA, Maltais LJ, Nebert DW, Renieri A, Schaffer JE, Stahl A, Watkins PA, Vasiliou V, Yamamoto TT.#TITLE:Revised nomenclature for the mammalian long-chain acyl-CoA synthetase gene family.#JOURNAL:J Lipid Res#YEAR:2004#PUBMED:15292367#;Reich, Sel&apos;kov#TITLE:Energy m…
857	FACOAL241	fatty-acid--CoA ligase	Fatty acid activation	6.2.1.3	( 2180.1 )	-1000	1000	4	NJ	Mashek DG, Bornfeldt KE, Coleman RA, Berger J, Bernlohr DA, Black P, DiRusso CC, Farber SA, Guo W, Hashimoto N, Khodiyar V, Kuypers FA, Maltais LJ, Nebert DW, Renieri A, Schaffer JE, Stahl A, Watkins PA, Vasiliou V, Yamamoto TT.#TITLE:Revised nomenclature for the mammalian long-chain acyl-CoA synthetase gene family.#JOURNAL:J Lipid Res#YEAR:2004#PUBMED:15292367#;Reich, Sel&apos;kov#TITLE:Energy m…
858	FACOAL244_1	fatty-acid--CoA ligase	Fatty acid activation	6.2.1.3	( 2180.1 )	-1000	1000	4	NJ	Mashek DG, Bornfeldt KE, Coleman RA, Berger J, Bernlohr DA, Black P, DiRusso CC, Farber SA, Guo W, Hashimoto N, Khodiyar V, Kuypers FA, Maltais LJ, Nebert DW, Renieri A, Schaffer JE, Stahl A, Watkins PA, Vasiliou V, Yamamoto TT.#TITLE:Revised nomenclature for the mammalian long-chain acyl-CoA synthetase gene family.#JOURNAL:J Lipid Res#YEAR:2004#PUBMED:15292367#;Reich, Sel&apos;kov#TITLE:Energy m…
859	FACOAL245_1	fatty-acid--CoA ligase	Fatty acid activation	6.2.1.3	( 2180.1 )	-1000	1000	4	NJ	Mashek DG, Bornfeldt KE, Coleman RA, Berger J, Bernlohr DA, Black P, DiRusso CC, Farber SA, Guo W, Hashimoto N, Khodiyar V, Kuypers FA, Maltais LJ, Nebert DW, Renieri A, Schaffer JE, Stahl A, Watkins PA, Vasiliou V, Yamamoto TT.#TITLE:Revised nomenclature for the mammalian long-chain acyl-CoA synthetase gene family.#JOURNAL:J Lipid Res#YEAR:2004#PUBMED:15292367#;Reich, Sel&apos;kov#TITLE:Energy m…
860	FACOAL245_2	fatty-acid--CoA ligase	Fatty acid activation	6.2.1.3	( 2180.1 )	-1000	1000	4	NJ	Mashek DG, Bornfeldt KE, Coleman RA, Berger J, Bernlohr DA, Black P, DiRusso CC, Farber SA, Guo W, Hashimoto N, Khodiyar V, Kuypers FA, Maltais LJ, Nebert DW, Renieri A, Schaffer JE, Stahl A, Watkins PA, Vasiliou V, Yamamoto TT.#TITLE:Revised nomenclature for the mammalian long-chain acyl-CoA synthetase gene family.#JOURNAL:J Lipid Res#YEAR:2004#PUBMED:15292367#;Reich, Sel&apos;kov#TITLE:Energy m…
861	FACOAL260	fatty-acid--CoA ligase (n-C26:0)	Fatty acid activation	6.2.1.3	( 2180.1 )	-1000	1000	4	cytoplasmic version -NJ	Mashek DG, Bornfeldt KE, Coleman RA, Berger J, Bernlohr DA, Black P, DiRusso CC, Farber SA, Guo W, Hashimoto N, Khodiyar V, Kuypers FA, Maltais LJ, Nebert DW, Renieri A, Schaffer JE, Stahl A, Watkins PA, Vasiliou V, Yamamoto TT.#TITLE:Revised nomenclature for the mammalian long-chain acyl-CoA synthetase gene family.#JOURNAL:J Lipid Res#YEAR:2004#PUBMED:15292367#;Reich, Sel&apos;kov#TITLE:Energy m…
862	FACOAL40im	fatty-acid--CoA ligase (butanoate), mitochondrial	Fatty acid activation	6.2.1.2	( 116285.1 )	0	1000	4	JLR changed EC from 6.2.1.3 (long chain fatty-acyl CoA ligase) to 6.2.1.2 (butyrate-CoA ligase) - NCD	Fujino T, Takei YA, Sone H, Ioka RX, Kamataki A, Magoori K, Takahashi S, Sakai J, Yamamoto TT#TITLE:Molecular identification and characterization of two medium-chain acyl-CoA synthetases, MACS1 and the Sa gene product#JOURNAL:J Biol Chem#YEAR:2001#PUBMED:11470804#;Bugaut M#TITLE:Occurrence, absorption and metabolism of short chain fatty acids in the digestive tract of mammals#JOURNAL:Comp Biochem…
863	FACOAL80i	fatty-acid--CoA ligase (octanoate)	Fatty acid activation	6.2.1.2	( 2181.1 ) or ( 2181.2 )	0	1000	4	JLR Also 6.2.1.3
864	FADDP	FAD diphosphatase	Riboflavin Metabolism	3.6.1.9	( 5167.1 )	0	1000	2	LOCUS:_5167#TRANSCRIPT:1#ABBREVIATION:ENPP1#ECNUMBERS:3.1.4.1,3.6.1.9#	Funakoshi I, Kato H, Horie K, Yano T, Hori Y, Kobayashi H, Inoue T, Suzuki H, Fukui S, Tsukahara M, et al.#TITLE:Molecular cloning of cDNAs for human fibroblast nucleotide pyrophosphatase.#JOURNAL:Arch Biochem Biophys.#YEAR:1992#PUBMED:1315502#
865	FADH2tru	FADH2 transporter, endoplasmic reticulum	Transport, Endoplasmic Reticular			0	1000	1	diffusion - but unidirectional uptake into ER (to avoid loops w/ NAD/NADP) NJ
866	FADH2tx	FADH2 transporter, peroxisomal	Transport, Peroxisomal			-1000	1000	1	most likely NOT physiological - detailed information about the peroxisomal transporters has not yet been achieved - this transport is most likely dependent on a concomitant energy consuming reaction (human ABC peroxisomal transporters: PEX family - check in future for new research articles describing biochemistry and stoichiometry) NJ
867	FADtru	FAD transporter, endoplasmic reticulum	Transport, Endoplasmic Reticular			0	1000	1	diffusion - but unidirectional output from ER (to avoid loops w/ NAD/NADP) NJ
868	FADtx	FAD transporter, peroxisomal	Transport, Peroxisomal			-1000	1000	1	most likely NOT physiological - detailed information about the peroxisomal transporters has not yet been achieved - this transport is most likely dependent on a concomitant energy consuming reaction (human ABC peroxisomal transporters: PEX family - check in future for new research articles describing biochemistry and stoichiometry) NJ
869	FALDH	formaldehyde dehydrogenase	Tyrosine metabolism	1.2.1.1	( 128.1 )	0	0	4	NCD	Engeland K, Hoog JO, Holmquist B, Estonius M, Jornvall H, Vallee BL#TITLE:Mutation of Arg-115 of human class III alcohol dehydrogenase: a binding site required for formaldehyde dehydrogenase activity and fatty acid activation#JOURNAL:Proc Natl Acad Sci U S A#YEAR:1993#PUBMED:8460164#;Uotila L, Koivusalo M#TITLE:Purification and properties of S-formylglutathione hydrolase from human liver#JOURNAL:…
870	FALDtm	formaldehyde transport via diffusion (mitochondrial)	Transport, Mitochondrial			-1000	1000	1	MM
871	FAOXC140	Beta oxidation of long chain fatty acid	Fatty acid oxidation	1.3.99.3	( 35.1 ) or ( 34.1 )	0	0	4	TV Other enzymes: 1.3.3.6, 4.2.1.74, 4.2.1.17, 1.1.1.35, 1.1.1.211	Naito E, Ozasa H, Ikeda Y, Tanaka K.#TITLE:Molecular cloning and nucleotide sequence of complementary DNAs encoding human short chain acyl-coenzyme A dehydrogenase and the study of the molecular basis of human short chain acyl-coenzyme A dehydrogenase deficiency.#JOURNAL:J Clin Invest#YEAR:1985#PUBMED:2565344#
872	FAOXC150m	Beta oxidation of long chain fatty acid (odd chain)	Fatty acid oxidation	1.3.99.3	( 35.1 ) or ( 34.1 )	0	0	4	by extension from even chain lumped FAO - should double-check stoich in future NJ	Naito E, Ozasa H, Ikeda Y, Tanaka K.#TITLE:Molecular cloning and nucleotide sequence of complementary DNAs encoding human short chain acyl-coenzyme A dehydrogenase and the study of the molecular basis of human short chain acyl-coenzyme A dehydrogenase deficiency.#JOURNAL:J Clin Invest#YEAR:1985#PUBMED:2565344#
873	FAOXC160	Beta oxidation of long chain fatty acid	Fatty acid oxidation	1.3.99.3	( 34.1 ) or ( 35.1 )	0	0	4	TV Other enzymes: 1.3.3.6, 4.2.1.74, 4.2.1.17, 1.1.1.35, 1.1.1.211	Kelly DP, Kim JJ, Billadello JJ, Hainline BE, Chu TW, Strauss AW#TITLE:Nucleotide sequence of medium-chain acyl-CoA dehydrogenase mRNA and its expression in enzyme-deficient human tissue.#JOURNAL:Proc Natl Acad Sci U S A.#YEAR:1987#PUBMED:3035565#;Naito E, Ozasa H, Ikeda Y, Tanaka K.#TITLE:Molecular cloning and nucleotide sequence of complementary DNAs encoding human short chain acyl-coenzyme A d…
874	FAOXC16080m	Beta oxidation of long chain fatty acid	Fatty acid oxidation	1.3.99.3	( 35.1 ) or ( 34.1 )	0	0	4	_4 rounds of beta ox c16:0 -&gt; c8:0, 4 step FAO lumped for 2 rounds also includes EC 1.1.1.35, 1.1.1.211, 1.3.3.6, 4.2.1.17, 4.2.1.74 NJ
875	FAOXC16080x	Beta oxidation of long chain fatty acid	Fatty acid oxidation, peroxisome	1.3.99.3	( 51.1 and 3295.1 and 30.1 ) or ( 51.1 and 30.1 and 1962.1 ) or ( 30.1 and 51.2 and 1962.1 ) or ( 3295.1 and 30.1 and 51.2 )	0	1000	4	_4 rounds of beta ox - in peroxisome, no fad, 1ste set of beta-ox is by acyl-coa oxidase (passes electrons directly to o2 -&gt; h2o2) c16:0 -&gt; c8:0, 4 step FAO lumped for 2 rounds also includes EC 1.1.1.35, 1.1.1.211, 1.3.3.6, 4.2.1.17, 4.2.1.74 NJ
876	FAOXC161802m	Beta oxidation fatty acid	Fatty acid activation	1.3.99.3	( 34.1 ) or ( 35.1 )	0	1000	4	_4 rounds of beta ox, 1 loss of degree of unsat -&gt; only 3 fad oxidized c16:1 -&gt; c8:0 4 step FAO lumped for 2 rounds also includes EC 1.1.1.35, 1.1.1.211, 1.3.3.6, 4.2.1.17, 4.2.1.74 NJ
877	FAOXC16180m	Beta oxidation fatty acid	Fatty acid oxidation	1.3.99.3	( 35.1 ) or ( 34.1 )	0	1000	4	_4 rounds of beta ox, 1 loss of degree of unsat -&gt; only 3 fad oxidized c16:1 -&gt; c8:0 4 step FAO lumped for 2 rounds also includes EC 1.1.1.35, 1.1.1.211, 1.3.3.6, 4.2.1.17, 4.2.1.74 NJ
878	FAOXC180	Beta oxidation of long chain fatty acid	Fatty acid oxidation	1.3.99.3	( 34.1 ) or ( 34.1 ) or ( 35.1 ) or ( 35.1 )	0	1000	4	TV Other enzymes: 1.3.3.6, 4.2.1.74, 4.2.1.17, 1.1.1.35, 1.1.1.211	Kelly DP, Kim JJ, Billadello JJ, Hainline BE, Chu TW, Strauss AW#TITLE:Nucleotide sequence of medium-chain acyl-CoA dehydrogenase mRNA and its expression in enzyme-deficient human tissue.#JOURNAL:Proc Natl Acad Sci U S A.#YEAR:1987#PUBMED:3035565#;Naito E, Ozasa H, Ikeda Y, Tanaka K.#TITLE:Molecular cloning and nucleotide sequence of complementary DNAs encoding human short chain acyl-coenzyme A d…
879	FAOXC180x	Beta oxidation of long chain fatty acid	Fatty acid oxidation, peroxisome	1.3.99.3	( 51.1 and 3295.1 and 30.1 ) or ( 51.1 and 30.1 and 1962.1 ) or ( 30.1 and 51.2 and 1962.1 ) or ( 3295.1 and 30.1 and 51.2 )	0	1000	4	- in peroxisome, no fad, 1ste set of beta-ox is by acyl-coa oxidase (passes electrons directly to o2 -&gt; h2o2) NJ
880	FAOXC1811601m	Beta oxidation fatty acid	Fatty acid oxidation	1.3.99.3	( 35.1 ) or ( 34.1 )	0	1000	4	_5 rounds of beta ox, 1 loss of degree of unsat -&gt; 4 fad oxidized c18:1 -&gt; c8:0 4 step FAO lumped for 2 rounds also includes EC 1.1.1.35, 1.1.1.211, 1.3.3.6, 4.2.1.17, 4.2.1.74 NJ
881	FAOXC1811602m	Beta oxidation fatty acid	Fatty acid oxidation	1.3.99.3	( 35.1 ) or ( 34.1 )	0	1000	4	_5 rounds of beta ox, 1 loss of degree of unsat -&gt; 4 fad oxidized c18:1 -&gt; c8:0 4 step FAO lumped for 2 rounds also includes EC 1.1.1.35, 1.1.1.211, 1.3.3.6, 4.2.1.17, 4.2.1.74 NJ
882	FAOXC1811603m	Beta oxidation fatty acid	Fatty acid oxidation	1.3.99.3	( 34.1 ) or ( 35.1 )	0	1000	4	_5 rounds of beta ox, 1 loss of degree of unsat -&gt; 4 fad oxidized c18:1 -&gt; c8:0 4 step FAO lumped for 2 rounds also includes EC 1.1.1.35, 1.1.1.211, 1.3.3.6, 4.2.1.17, 4.2.1.74 NJ
883	FAOXC182806m	Beta oxidation of fatty acid	Fatty acid oxidation	1.3.99.3	( 34.1 ) or ( 35.1 )	0	1000	4	c18:2,n-6 -&gt; c8:0 - 5 rounds of beta ox, lose 2 degrees of unsat - only 3 fad oxidized 4 step FAO lumped also includes EC 1.1.1.35, 1.1.1.211, 1.3.3.6, 4.2.1.17, 4.2.1.74 NJ
884	FAOXC18280m	Beta oxidation of fatty acid	Fatty acid oxidation	1.3.99.3	( 34.1 ) or ( 35.1 )	0	1000	4	c18:2, transe -&gt; c8:0 - 5 rounds of beta ox, lose 2 degrees of unsat - only 3 fad oxidized 4 step FAO lumped also includes EC 1.1.1.35, 1.1.1.211, 1.3.3.6, 4.2.1.17, 4.2.1.74 NJ
885	FAOXC183803m	Beta oxidation of fatty acid	Fatty acid oxidation	1.3.99.3	( 34.1 ) or ( 35.1 )	0	1000	4	c18:3, n-3 -&gt; c8:0 - 5 rounds of beta ox, lose 3 degrees of unsat - only 2 fad oxidized 4 step FAO lumped also includes EC 1.1.1.35, 1.1.1.211, 1.3.3.6, 4.2.1.17, 4.2.1.74 NJ
886	FAOXC183806m	Beta oxidation of fatty acid	Fatty acid oxidation	1.3.99.3	( 34.1 ) or ( 35.1 )	0	1000	4	_5 rounds of beta ox, 3 degrees loss of saturation -&gt; only 2 fad oxidized to fadh2 - in peroxisome, no fad, 1ste set of beta-ox is by acyl-coa oxidase (passes electrons directly to o2 -&gt; h2o2) peroxisomal (very long chain FA) c18:3,n-6 -&gt; c8:0, 4 step FAO lumped for 2 rounds also includes EC 1.1.1.35, 1.1.1.211, 1.3.3.6, 4.2.1.17, 4.2.1.74 NJ
887	FAOXC183806x	Beta oxidation of long chain fatty acid	Fatty acid oxidation, peroxisome	1.3.99.3	( 3295.1 and 30.1 and 51.2 ) or ( 30.1 and 51.2 and 1962.1 ) or ( 51.1 and 3295.1 and 30.1 ) or ( 51.1 and 30.1 and 1962.1 )	0	1000	4	_5 rounds of beta ox, 3 degrees loss of saturation -&gt; only 2 fad oxidized to fadh2 - in peroxisome, no fad, 1ste set of beta-ox is by acyl-coa oxidase (passes electrons directly to o2 -&gt; h2o2) peroxisomal (very long chain FA) c18:3,n-6 -&gt; c8:0, 4 step FAO lumped for 2 rounds also includes EC 1.1.1.35, 1.1.1.211, 1.3.3.6, 4.2.1.17, 4.2.1.74 NJ
888	FAOXC18480m	Beta oxidation of fatty acid	Fatty acid oxidation	1.3.99.3	( 34.1 ) or ( 35.1 )	0	1000	4	_5 rounds of beta ox, 4 degrees loss of saturation -&gt; only 1 fad oxidized to fadh2 peroxisomal (very long chain FA) c18:4,n-6 -&gt; c8:0, 4 step FAO lumped for 2 rounds also includes EC 1.1.1.35, 1.1.1.211, 1.3.3.6, 4.2.1.17, 4.2.1.74 NJ
889	FAOXC18480x	Beta oxidation of long chain fatty acid	Fatty acid oxidation, peroxisome	1.3.99.3	( 51.1 and 3295.1 and 30.1 ) or ( 30.1 and 51.2 and 1962.1 ) or ( 51.1 and 30.1 and 1962.1 ) or ( 3295.1 and 30.1 and 51.2 )	0	1000	4	_5 rounds of beta ox, 4 degrees loss of saturation -&gt; only 1 fad oxidized to fadh2 - in peroxisome, no fad, 1ste set of beta-ox is by acyl-coa oxidase (passes electrons directly to o2 -&gt; h2o2) peroxisomal (very long chain FA) c18:4,n-6 -&gt; c8:0, 4 step FAO lumped for 2 rounds also includes EC 1.1.1.35, 1.1.1.211, 1.3.3.6, 4.2.1.17, 4.2.1.74 NJ
890	FAOXC200180m	Beta oxidation of long chain fatty acid	Fatty acid oxidation	1.3.99.3	( 35.1 ) or ( 34.1 )	0	1000	4	c20:0 -&gt; c18:0 4 step FAO lumped also includes EC 1.1.1.35, 1.1.1.211, 1.3.3.6, 4.2.1.17, 4.2.1.74 NJ
891	FAOXC200180x	Beta oxidation of long chain fatty acid	Fatty acid oxidation, peroxisome	1.3.99.3	( 3295.1 and 30.1 and 51.2 ) or ( 51.1 and 30.1 and 1962.1 ) or ( 51.1 and 3295.1 and 30.1 ) or ( 30.1 and 51.2 and 1962.1 )	0	1000	4	peroxisomal (very long chain FA) - in peroxisome, no fad, 1ste set of beta-ox is by acyl-coa oxidase (passes electrons directly to o2 -&gt; h2o2) c20:0 -&gt; c18:0 4 step FAO lumped also includes EC 1.1.1.35, 1.1.1.211, 1.3.3.6, 4.2.1.17, 4.2.1.74 NJ
892	FAOXC2031836m	Beta oxidation of fatty acid	Fatty acid oxidation	1.3.99.3	( 35.1 ) or ( 34.1 )	0	1000	4	c20:3 -&gt; c18:3 4 step FAO lumped also includes EC 1.1.1.35, 1.1.1.211, 1.3.3.6, 4.2.1.17, 4.2.1.74 NJ
893	FAOXC204	Beta oxidation of long chain fatty acid	Fatty acid oxidation	1.3.99.3	( 35.1 ) or ( 35.1 ) or ( 34.1 ) or ( 34.1 )	0	1000	4	TV Other enzymes: 1.3.3.6, 4.2.1.74, 4.2.1.17, 1.1.1.35, 1.1.1.211	Kelly DP, Kim JJ, Billadello JJ, Hainline BE, Chu TW, Strauss AW#TITLE:Nucleotide sequence of medium-chain acyl-CoA dehydrogenase mRNA and its expression in enzyme-deficient human tissue.#JOURNAL:Proc Natl Acad Sci U S A.#YEAR:1987#PUBMED:3035565#;Naito E, Ozasa H, Ikeda Y, Tanaka K.#TITLE:Molecular cloning and nucleotide sequence of complementary DNAs encoding human short chain acyl-coenzyme A d…
894	FAOXC204184m	Beta oxidation fatty acid	Fatty acid oxidation	1.3.99.3	( 35.1 ) or ( 34.1 )	0	1000	4	_1 rounds of beta ox c20:4 -&gt; c18:4 4 step FAO lumped for 2 rounds also includes EC 1.1.1.35, 1.1.1.211, 1.3.3.6, 4.2.1.17, 4.2.1.74 NJ
895	FAOXC2051843m	Beta oxidation of fatty acid	Fatty acid oxidation	1.3.99.3	( 34.1 ) or ( 35.1 )	0	1000	4	_1 round beta ox, 1 degree loss of sat -&gt; no fad oxidation peroxisomal (very long chain FA) c20:5,n-3 -&gt; c18:4, n-3 - final &apos;3&apos; in abbreviation indicates omega3 FA 4 step FAO lumped for 2 rounds also includes EC 1.1.1.35, 1.1.1.211, 1.3.3.6, 4.2.1.17, 4.2.1.74 NJ
896	FAOXC2051843x	Beta oxidation of long chain fatty acid	Fatty acid oxidation, peroxisome	1.3.99.3	( 30.1 and 51.2 and 1962.1 ) or ( 51.1 and 3295.1 and 30.1 ) or ( 51.1 and 30.1 and 1962.1 ) or ( 3295.1 and 30.1 and 51.2 )	0	1000	4	_1 round beta ox, 1 degree loss of sat -&gt; no fad oxidation - in peroxisome, no fad, 1ste set of beta-ox is by acyl-coa oxidase (passes electrons directly to o2 -&gt; h2o2) peroxisomal (very long chain FA) c20:5,n-3 -&gt; c18:4, n-3 - final &apos;3&apos; in abbreviation indicates omega3 FA 4 step FAO lumped for 2 rounds also includes EC 1.1.1.35, 1.1.1.211, 1.3.3.6, 4.2.1.17, 4.2.1.74 NJ
897	FAOXC2242046m	Beta oxidation of long chain fatty acid	Fatty acid oxidation	1.3.99.3	( 34.1 ) or ( 35.1 )	0	1000	4	_1 round beta ox peroxisomal (very long chain FA) c22:4,n-6 -&gt; c20:4, n-6 - final &apos;6&apos; in abbreviation indicates omega6 FA 4 step FAO lumped for 2 rounds also includes EC 1.1.1.35, 1.1.1.211, 1.3.3.6, 4.2.1.17, 4.2.1.74 NJ
898	FAOXC2242046x	Beta oxidation of long chain fatty acid	Fatty acid oxidation, peroxisome	1.3.99.3	( 3295.1 and 30.1 and 51.2 ) or ( 51.1 and 30.1 and 1962.1 ) or ( 30.1 and 51.2 and 1962.1 ) or ( 51.1 and 3295.1 and 30.1 )	0	1000	4	_1 round beta ox - in peroxisome, no fad, 1ste set of beta-ox is by acyl-coa oxidase (passes electrons directly to o2 -&gt; h2o2) peroxisomal (very long chain FA) c22:4,n-6 -&gt; c20:4, n-6 - final &apos;6&apos; in abbreviation indicates omega6 FA 4 step FAO lumped for 2 rounds also includes EC 1.1.1.35, 1.1.1.211, 1.3.3.6, 4.2.1.17, 4.2.1.74 NJ
899	FAOXC2251836m	Beta oxidation of fatty acid	Fatty acid oxidation	1.3.99.3	( 34.1 ) or ( 35.1 )	0	1000	4	_2 rounds of beta-ox, plus a loss of 2 degrees of desatuartion, so no fad is oxidized peroxisomal (very long chain FA) c22:5,n-6 -&gt; c18:3, n-6 - final &apos;6&apos; in abbreviation indicates omega6 FA 4 step FAO lumped for 2 rounds also includes EC 1.1.1.35, 1.1.1.211, 1.3.3.6, 4.2.1.17, 4.2.1.74 NJ
900	FAOXC2251836x	Beta oxidation of long chain fatty acid	Fatty acid oxidation, peroxisome	1.3.99.3	( 3295.1 and 30.1 and 51.2 ) or ( 51.1 and 30.1 and 1962.1 ) or ( 51.1 and 3295.1 and 30.1 ) or ( 30.1 and 51.2 and 1962.1 )	0	1000	4	_2 rounds of beta-ox, plus a loss of 2 degrees of desatuartion, so no fad is oxidized - in peroxisome, no fad, 1ste set of beta-ox is by acyl-coa oxidase (passes electrons directly to o2 -&gt; h2o2) peroxisomal (very long chain FA) c22:5,n-6 -&gt; c18:3, n-6 - final &apos;6&apos; in abbreviation indicates omega6 FA 4 step FAO lumped for 2 rounds also includes EC 1.1.1.35, 1.1.1.211, 1.3.3.6, 4.2.…
901	FAOXC2252053m	Beta oxidation of long chain fatty acid	Fatty acid oxidation	1.3.99.3	( 35.1 ) or ( 34.1 )	0	0	4	_1 round beta ox - c22:5,n-3 -&gt; c20:5, n-3 - final &apos;3&apos; in abbreviation indicates omega3 FA 4 step FAO lumped for 2 rounds also includes EC 1.1.1.35, 1.1.1.211, 1.3.3.6, 4.2.1.17, 4.2.1.74 NJ
902	FAOXC2252053x	Beta oxidation of long chain fatty acid	Fatty acid oxidation, peroxisome	1.3.99.3	( 51.1 and 3295.1 and 30.1 ) or ( 30.1 and 51.2 and 1962.1 ) or ( 51.1 and 30.1 and 1962.1 ) or ( 3295.1 and 30.1 and 51.2 )	0	1000	4	_1 round beta ox - in peroxisome, no fad, 1ste set of beta-ox is by acyl-coa oxidase (passes electrons directly to o2 -&gt; h2o2) peroxisomal (very long chain FA) c22:5,n-3 -&gt; c20:5, n-3 - final &apos;3&apos; in abbreviation indicates omega3 FA 4 step FAO lumped for 2 rounds also includes EC 1.1.1.35, 1.1.1.211, 1.3.3.6, 4.2.1.17, 4.2.1.74 NJ
903	FAOXC226	Beta oxidation of long chain fatty acid	Fatty acid oxidation	1.3.99.3	( 35.1 ) or ( 34.1 )	0	1000	4	TV Other enzymes: 1.3.3.6, 4.2.1.74, 4.2.1.17, 1.1.1.35, 1.1.1.211	Kelly DP, Kim JJ, Billadello JJ, Hainline BE, Chu TW, Strauss AW#TITLE:Nucleotide sequence of medium-chain acyl-CoA dehydrogenase mRNA and its expression in enzyme-deficient human tissue.#JOURNAL:Proc Natl Acad Sci U S A.#YEAR:1987#PUBMED:3035565#;Naito E, Ozasa H, Ikeda Y, Tanaka K.#TITLE:Molecular cloning and nucleotide sequence of complementary DNAs encoding human short chain acyl-coenzyme A d…
904	FAOXC226205m	Beta oxidation of long chain fatty acid	Fatty acid oxidation	1.3.99.3	( 35.1 ) or ( 34.1 )	0	0	4	_1 round of beta-oxidation, loses degree of desat, so no fad peroxisomal (very long chain FA) c22:6,n-3 -&gt; c20:5, n-3 4 step FAO lumped also includes EC 1.1.1.35, 1.1.1.211, 1.3.3.6, 4.2.1.17, 4.2.1.74 NJ	Kelly DP, Kim JJ, Billadello JJ, Hainline BE, Chu TW, Strauss AW#TITLE:Nucleotide sequence of medium-chain acyl-CoA dehydrogenase mRNA and its expression in enzyme-deficient human tissue.#JOURNAL:Proc Natl Acad Sci U S A.#YEAR:1987#PUBMED:3035565#;Naito E, Ozasa H, Ikeda Y, Tanaka K.#TITLE:Molecular cloning and nucleotide sequence of complementary DNAs encoding human short chain acyl-coenzyme A d…
905	FAOXC226205x	Beta oxidation of long chain fatty acid	Fatty acid oxidation, peroxisome	1.3.99.3	( 3295.1 and 30.1 and 51.2 ) or ( 51.1 and 3295.1 and 30.1 ) or ( 30.1 and 51.2 and 1962.1 ) or ( 51.1 and 30.1 and 1962.1 )	0	1000	4	_1 round of beta-oxidation, loses degree of desat, so no fad - in peroxisome, no fad, 1ste set of beta-ox is by acyl-coa oxidase (passes electrons directly to o2 -&gt; h2o2) peroxisomal (very long chain FA) c22:6,n-3 -&gt; c20:5, n-3 4 step FAO lumped also includes EC 1.1.1.35, 1.1.1.211, 1.3.3.6, 4.2.1.17, 4.2.1.74 NJ
906	FAOXC240200x	Beta oxidation of long chain fatty acid	Fatty acid oxidation, peroxisome	1.3.99.3	( 51.1 and 3295.1 and 30.1 ) or ( 30.1 and 51.2 and 1962.1 ) or ( 51.1 and 30.1 and 1962.1 ) or ( 3295.1 and 30.1 and 51.2 )	0	1000	4	peroxisomal (very long chain FA) - in peroxisome, no fad, 1ste set of beta-ox is by acyl-coa oxidase (passes electrons directly to o2 -&gt; h2o2) c24:0 -&gt; c20:0 4 step FAO lumped for 2 rounds also includes EC 1.1.1.35, 1.1.1.211, 1.3.3.6, 4.2.1.17, 4.2.1.74 NJ
907	FAOXC241181x	Beta oxidation of long chain fatty acid	Fatty acid oxidation, peroxisome	1.3.99.3	( 3295.1 and 30.1 and 51.2 ) or ( 51.1 and 30.1 and 1962.1 ) or ( 51.1 and 3295.1 and 30.1 ) or ( 30.1 and 51.2 and 1962.1 )	0	1000	4	peroxisomal (very long chain FA) - in peroxisome, no fad, 1ste set of beta-ox is by acyl-coa oxidase (passes electrons directly to o2 -&gt; h2o2) c24:1 -&gt; c18:1 - 3 rounds beta-ox 4 step FAO lumped also includes EC 1.1.1.35, 1.1.1.211, 1.3.3.6, 4.2.1.17, 4.2.1.74 NJ
908	FAOXC2442246x	Beta oxidation of long chain fatty acid	Fatty acid oxidation, peroxisome	1.3.99.3	( 51.1 and 3295.1 and 30.1 ) or ( 51.1 and 30.1 and 1962.1 ) or ( 30.1 and 51.2 and 1962.1 ) or ( 3295.1 and 30.1 and 51.2 )	0	1000	4	_1 round beta ox - - in peroxisome, no fad, 1ste set of beta-ox is by acyl-coa oxidase (passes electrons directly to o2 -&gt; h2o2) peroxisomal (very long chain FA) c24:4,n-6 -&gt; c22:4, n-6 - final &apos;6&apos; in abbreviation indicates omega6 FA 4 step FAO lumped for 2 rounds also includes EC 1.1.1.35, 1.1.1.211, 1.3.3.6, 4.2.1.17, 4.2.1.74 NJ
909	FAOXC2452253x	Beta oxidation of long chain fatty acid	Fatty acid oxidation, peroxisome	1.3.99.3	( 3295.1 and 30.1 and 51.2 ) or ( 30.1 and 51.2 and 1962.1 ) or ( 51.1 and 30.1 and 1962.1 ) or ( 51.1 and 3295.1 and 30.1 )	0	1000	4	- in peroxisome, no fad, 1ste set of beta-ox is by acyl-coa oxidase (passes electrons directly to o2 -&gt; h2o2) confusing name, sorry - accounting for omega3 vs omega6 FA peroxisomal (very long chain FA) c24:5,n-3 -&gt; c22:5, n-3 4 step FAO lumped also includes EC 1.1.1.35, 1.1.1.211, 1.3.3.6, 4.2.1.17, 4.2.1.74 NJ
910	FAOXC2452256x	Beta oxidation of long chain fatty acid	Fatty acid oxidation, peroxisome	1.3.99.3	( 3295.1 and 30.1 and 51.2 ) or ( 51.1 and 3295.1 and 30.1 ) or ( 30.1 and 51.2 and 1962.1 ) or ( 51.1 and 30.1 and 1962.1 )	0	1000	4	peroxisomal (very long chain FA) - - in peroxisome, no fad, 1ste set of beta-ox is by acyl-coa oxidase (passes electrons directly to o2 -&gt; h2o2) c24:5,n-6 -&gt; c22:5, n-6 4 step FAO lumped also includes EC 1.1.1.35, 1.1.1.211, 1.3.3.6, 4.2.1.17, 4.2.1.74 NJ
911	FAOXC246226x	Beta oxidation of long chain fatty acid	Fatty acid oxidation, peroxisome	1.3.99.3	( 3295.1 and 30.1 and 51.2 ) or ( 51.1 and 3295.1 and 30.1 ) or ( 30.1 and 51.2 and 1962.1 ) or ( 51.1 and 30.1 and 1962.1 )	0	1000	4	peroxisomal (very long chain FA) - - in peroxisome, no fad, 1ste set of beta-ox is by acyl-coa oxidase (passes electrons directly to o2 -&gt; h2o2) c24:6 -&gt; c22:6 4 step FAO lumped also includes EC 1.1.1.35, 1.1.1.211, 1.3.3.6, 4.2.1.17, 4.2.1.74 NJ
912	FAOXC260240x	Beta oxidation of long chain fatty acid	Fatty acid oxidation, peroxisome	1.3.99.3	( 3295.1 and 30.1 and 51.2 ) or ( 51.1 and 30.1 and 1962.1 ) or ( 51.1 and 3295.1 and 30.1 ) or ( 30.1 and 51.2 and 1962.1 )	0	1000	4	peroxisomal (very long chain FA) - in peroxisome, no fad, 1ste set of beta-ox is by acyl-coa oxidase (passes electrons directly to o2 -&gt; h2o2) c26:0 -&gt; c24:0 4 step FAO lumped also includes EC 1.1.1.35, 1.1.1.211, 1.3.3.6, 4.2.1.17, 4.2.1.74 -&gt; into pmtcoa NJ
913	FAOXC80	Beta oxidation of med/long chain fatty acid	Fatty acid oxidation	1.3.99.3	( 35.1 ) or ( 34.1 )	0	0	4	TDV (9/7/2004) Other enzymes: 1.3.3.6, 4.2.1.74, 4.2.1.17, 1.1.1.35, 1.1.1.211	Kelly DP, Kim JJ, Billadello JJ, Hainline BE, Chu TW, Strauss AW#TITLE:Nucleotide sequence of medium-chain acyl-CoA dehydrogenase mRNA and its expression in enzyme-deficient human tissue.#JOURNAL:Proc Natl Acad Sci U S A.#YEAR:1987#PUBMED:3035565#;Naito E, Ozasa H, Ikeda Y, Tanaka K.#TITLE:Molecular cloning and nucleotide sequence of complementary DNAs encoding human short chain acyl-coenzyme A d…
914	FAS100COA	fatty acyl-CoA synthase (n-C10:0CoA)	Fatty acid elongation	2.3.1.86	( 2194.1 )	0	1000	4	NCD	Murray RK, Granner DK, Mayes PA, Rodwell VW#TITLE:Harper&apos;s Biochemistry#YEAR:1999#;Chakravarty B, Gu Z, Chirala SS, Wakil SJ, Quiocho FA.#TITLE:Human fatty acid synthase: structure and substrate selectivity of the thioesterase domain.#YEAR:2004#PUBMED:15507492#;Brink J, Ludtke SJ, Yang CY, Gu ZW, Wakil SJ, Chiu W.#TITLE:Quaternary structure of human fatty acid synthase by electron cryomicros…
915	FAS120COA	fatty-acyl-CoA synthase (n-C12:0CoA)	Fatty acid elongation	2.3.1.86	( 2194.1 )	0	1000	4	NCD	Murray RK, Granner DK, Mayes PA, Rodwell VW#TITLE:Harper&apos;s Biochemistry#YEAR:1999#;Chakravarty B, Gu Z, Chirala SS, Wakil SJ, Quiocho FA.#TITLE:Human fatty acid synthase: structure and substrate selectivity of the thioesterase domain.#YEAR:2004#PUBMED:15507492#;Brink J, Ludtke SJ, Yang CY, Gu ZW, Wakil SJ, Chiu W.#TITLE:Quaternary structure of human fatty acid synthase by electron cryomicros…
916	FAS140COA	fatty-acyl-CoA synthase (n-C14:0CoA)	Fatty acid elongation	2.3.1.86	( 2194.1 )	0	1000	4	NCD	Murray RK, Granner DK, Mayes PA, Rodwell VW#TITLE:Harper&apos;s Biochemistry#YEAR:1999#;Chakravarty B, Gu Z, Chirala SS, Wakil SJ, Quiocho FA.#TITLE:Human fatty acid synthase: structure and substrate selectivity of the thioesterase domain.#YEAR:2004#PUBMED:15507492#;Brink J, Ludtke SJ, Yang CY, Gu ZW, Wakil SJ, Chiu W.#TITLE:Quaternary structure of human fatty acid synthase by electron cryomicros…
917	FAS160COA	fatty-acyl-CoA synthase (n-C16:0CoA)	Fatty acid elongation	2.3.1.86	( 2194.1 )	0	1000	4	NCD	Murray RK, Granner DK, Mayes PA, Rodwell VW#TITLE:Harper&apos;s Biochemistry#YEAR:1999#;Chakravarty B, Gu Z, Chirala SS, Wakil SJ, Quiocho FA.#TITLE:Human fatty acid synthase: structure and substrate selectivity of the thioesterase domain.#YEAR:2004#PUBMED:15507492#;Brink J, Ludtke SJ, Yang CY, Gu ZW, Wakil SJ, Chiu W.#TITLE:Quaternary structure of human fatty acid synthase by electron cryomicros…
918	FAS180COA	fatty-acyl-CoA synthase (n-C18:0CoA)	Fatty acid elongation	2.3.1.86	( 2194.1 )	0	1000	4	NCD	Murray RK, Granner DK, Mayes PA, Rodwell VW#TITLE:Harper&apos;s Biochemistry#YEAR:1999#;Chakravarty B, Gu Z, Chirala SS, Wakil SJ, Quiocho FA.#TITLE:Human fatty acid synthase: structure and substrate selectivity of the thioesterase domain.#YEAR:2004#PUBMED:15507492#;Brink J, Ludtke SJ, Yang CY, Gu ZW, Wakil SJ, Chiu W.#TITLE:Quaternary structure of human fatty acid synthase by electron cryomicros…
919	FAS80COA_L	fatty acyl-CoA synthase (n-C8:0CoA), lumped reaction	Fatty acid elongation	2.3.1.86	( 2194.1 )	0	1000	4	NCD	Murray RK, Granner DK, Mayes PA, Rodwell VW#TITLE:Harper&apos;s Biochemistry#YEAR:1999#;Chakravarty B, Gu Z, Chirala SS, Wakil SJ, Quiocho FA.#TITLE:Human fatty acid synthase: structure and substrate selectivity of the thioesterase domain.#YEAR:2004#PUBMED:15507492#;Brink J, Ludtke SJ, Yang CY, Gu ZW, Wakil SJ, Chiu W.#TITLE:Quaternary structure of human fatty acid synthase by electron cryomicros…
920	FATP1t	fatty acid electroneutral transport	Transport, Extracellular		( 376497.2 ) or ( 10999.1 ) or ( 376497.1 ) or ( 11000.1 )	-1000	1000	4	electroneutral transport NJ	Fitscher BA, Riedel HD, Young KC, Stremmel W.#TITLE:Tissue distribution and cDNA cloning of a human fatty acid transport protein (hsFATP4).#JOURNAL:Biochim Biophys Acta.#YEAR:1998#PUBMED:9878842#;Stahl A.#TITLE:A current review of fatty acid transport proteins (SLC27).#JOURNAL:Pflugers Arch. #YEAR:2004#PUBMED:12856180#;Pohl J, Ring A, Hermann T, Stremmel W.#TITLE:Role of FATP in parenchymal cell …
921	FATP2t	fatty acid electroneutral transport	Transport, Extracellular		( 376497.1 ) or ( 376497.2 )	-1000	1000	4	electroneutral transport NJ	Stahl A.#TITLE:A current review of fatty acid transport proteins (SLC27).#JOURNAL:Pflugers Arch. #YEAR:2004#PUBMED:12856180#;Pohl J, Ring A, Hermann T, Stremmel W.#TITLE:Role of FATP in parenchymal cell fatty acid uptake.#JOURNAL:Biochim Biophys Acta#YEAR:2004#PUBMED:15522816#
922	FATP3t	fatty acid electroneutral transport	Transport, Extracellular		( 376497.1 ) or ( 376497.2 )	-1000	1000	4	electroneutral transport NJ	Stahl A.#TITLE:A current review of fatty acid transport proteins (SLC27).#JOURNAL:Pflugers Arch. #YEAR:2004#PUBMED:12856180#;Pohl J, Ring A, Hermann T, Stremmel W.#TITLE:Role of FATP in parenchymal cell fatty acid uptake.#JOURNAL:Biochim Biophys Acta#YEAR:2004#PUBMED:15522816#
923	FATP4t	fatty acid electroneutral transport	Transport, Extracellular		( 10998.1 )	-1000	1000	4	electroneutral transport NJ	Steinberg SJ, Wang SJ, McGuinness MC, Watkins PA.#TITLE:Human liver-specific very-long-chain acyl-coenzyme A synthetase: cDNA cloning and characterization of a second enzymatically active protein.#JOURNAL:Mol Genet Metab.#YEAR:1999#PUBMED:10479480#;Stahl A.#TITLE:A current review of fatty acid transport proteins (SLC27).#JOURNAL:Pflugers Arch. #YEAR:2004#PUBMED:12856180#;Pohl J, Ring A, Hermann T…
924	FATP5t	fatty acid electroneutral transport	Transport, Extracellular		( 10998.1 )	-1000	1000	4	electroneutral transport NJ	Steinberg SJ, Wang SJ, McGuinness MC, Watkins PA.#TITLE:Human liver-specific very-long-chain acyl-coenzyme A synthetase: cDNA cloning and characterization of a second enzymatically active protein.#JOURNAL:Mol Genet Metab.#YEAR:1999#PUBMED:10479480#;Stahl A.#TITLE:A current review of fatty acid transport proteins (SLC27).#JOURNAL:Pflugers Arch. #YEAR:2004#PUBMED:12856180#;Pohl J, Ring A, Hermann T…
925	FATP6t	fatty acid electroneutral transport	Transport, Extracellular		( 10998.1 ) or ( 11001.1 )	-1000	1000	4	electroneutral transport NJ	Steinberg SJ, Wang SJ, McGuinness MC, Watkins PA.#TITLE:Human liver-specific very-long-chain acyl-coenzyme A synthetase: cDNA cloning and characterization of a second enzymatically active protein.#JOURNAL:Mol Genet Metab.#YEAR:1999#PUBMED:10479480#;Stahl A.#TITLE:A current review of fatty acid transport proteins (SLC27).#JOURNAL:Pflugers Arch. #YEAR:2004#PUBMED:12856180#;Pohl J, Ring A, Hermann T…
926	FATP7t	fatty acid electroneutral transport	Transport, Extracellular		( 10998.1 ) or ( 11001.1 )	-1000	1000	4	electroneutral transport NJ	Steinberg SJ, Wang SJ, McGuinness MC, Watkins PA.#TITLE:Human liver-specific very-long-chain acyl-coenzyme A synthetase: cDNA cloning and characterization of a second enzymatically active protein.#JOURNAL:Mol Genet Metab.#YEAR:1999#PUBMED:10479480#;Stahl A.#TITLE:A current review of fatty acid transport proteins (SLC27).#JOURNAL:Pflugers Arch. #YEAR:2004#PUBMED:12856180#;Pohl J, Ring A, Hermann T…
927	FATP8t	fatty acid electroneutral transport	Transport, Extracellular		( 10998.1 ) or ( 11001.1 )	-1000	1000	4	electroneutral transport NJ	Steinberg SJ, Wang SJ, McGuinness MC, Watkins PA.#TITLE:Human liver-specific very-long-chain acyl-coenzyme A synthetase: cDNA cloning and characterization of a second enzymatically active protein.#JOURNAL:Mol Genet Metab.#YEAR:1999#PUBMED:10479480#;Stahl A.#TITLE:A current review of fatty acid transport proteins (SLC27).#JOURNAL:Pflugers Arch. #YEAR:2004#PUBMED:12856180#;Pohl J, Ring A, Hermann T…
928	FATP9t	fatty acid electroneutral transport	Transport, Extracellular		( 10998.1 ) or ( 11001.1 )	-1000	1000	4	electroneutral transport NJ	Steinberg SJ, Wang SJ, McGuinness MC, Watkins PA.#TITLE:Human liver-specific very-long-chain acyl-coenzyme A synthetase: cDNA cloning and characterization of a second enzymatically active protein.#JOURNAL:Mol Genet Metab.#YEAR:1999#PUBMED:10479480#;Stahl A.#TITLE:A current review of fatty acid transport proteins (SLC27).#JOURNAL:Pflugers Arch. #YEAR:2004#PUBMED:12856180#;Pohl J, Ring A, Hermann T…
929	FBA	fructose-bisphosphate aldolase	Glycolysis/Gluconeogenesis	4.1.2.13	( 226.2 ) or ( 226.1 ) or ( 226.3 ) or ( 230.1 ) or ( 229.1 )	0	85.5341	0	LOCUS:_226#TRANSCRIPT:1#ABBREVIATION:ALDOA#ECNUMBERS:4.1.2.13#
930	FBA2	D-Fructose 1-phosphate D-glyceraldehyde-3-phosphate-lyase	Fructose and Mannose Metabolism	4.1.2.13	( 226.2 ) or ( 226.1 ) or ( 226.3 ) or ( 229.1 ) or ( 230.1 )	-1000	1000	2	NCD
931	FBA4	D-Fructose 1-phosphate D-glyceraldehyde-3-phosphate-lyase	Glyoxylate and Dicarboxylate Metabolism	4.1.2.13	( 226.2 ) or ( 229.1 ) or ( 226.3 ) or ( 230.1 ) or ( 226.1 )	-1000	1000	4	NCD	Bais R, James HM, Rofe AM, Conyers RA.#TITLE:The purification and properties of human liver ketohexokinase. A role for ketohexokinase and fructose-bisphosphate aldolase in the metabolic production of oxalate from xylitol#JOURNAL:Biochem J#YEAR:1985#PUBMED:2996495#;Barngrover DA, Dills WL Jr.#TITLE:The involvement of liver fructokinase in the metabolism of D-xylulose and xylitol in isolated rat he…
932	FBA5	D-Tagatose 1-phosphate D-glyceraldehyde-3-phosphate-lyase	Galactose metabolism	4.1.2.13	( 229.1 )	-1000	1000	4	NCD	Bais R, James HM, Rofe AM, Conyers RA.#TITLE:The purification and properties of human liver ketohexokinase. A role for ketohexokinase and fructose-bisphosphate aldolase in the metabolic production of oxalate from xylitol#JOURNAL:Biochem J#YEAR:1985#PUBMED:2996495#;Barngrover DA, Dills WL Jr.#TITLE:The involvement of liver fructokinase in the metabolism of D-xylulose and xylitol in isolated rat he…
933	FBP26	Fructose-2,6-bisphosphate 2-phosphatase	Fructose and Mannose Metabolism	3.1.3.46	( 2203.1 ) or ( 5210.1 ) or ( 5207.1 ) or ( 5209.1 ) or ( 5208.1 ) or ( 8789.1 )	0	1000	0	IF
934	FCLTm	Ferrochelatase, mitochondrial	Heme Biosynthesis	4.99.1.1	( 2235.1 ) or ( 2235.2 )	0	1000	2	NCD	Tugores A, Magness ST, Brenner DA.#TITLE:A single promoter directs both housekeeping and erythroid preferential expression of the human ferrochelatase gene. #JOURNAL:J Biol Chem#YEAR:1994#PUBMED:7983009#
935	FE2tm	iron (II) transport	Transport, Mitochondrial			0	1000	2	TDV Lange H, 1999.	Lange H, Kispal G, Lill R.#TITLE:Mechanism of iron transport to the site of heme synthesis inside yeast mitochondria.#JOURNAL:J Biol Chem#YEAR:1999#PUBMED:10383398#;Chung J, Wessling-Resnick M#TITLE:Molecular mechanisms and regulation of iron transport.#JOURNAL:Crit Rev Clin Lab Sci#YEAR:2003#PUBMED:12755454#
936	FMNAT	FMN adenylyltransferase	Riboflavin Metabolism	2.7.7.2	( 80308.1 ) or ( 80308.2 )	0	1000	2	LOCUS:_80308#TRANSCRIPT:1#ABBREVIATION:FADS#ECNUMBERS:2.7.7.2#
937	FOLR2	folate reductase	Folate Metabolism	1.5.1.3	( 1719.1 )	0	1000	2	Reaction can be catalyzed by dihydrofolate dehydrogenase (EC 1.5.1.3) - to H2F	Ball, G.F.M#TITLE:Vitamins: Their Role in the Human Body#YEAR:2004#;Funanage VL, Myoda TT, Moses PA, Cowell HR.#TITLE:Assignment of the human dihydrofolate reductase gene to the q11----q22 region of chromosome 5.#JOURNAL:Mol Cell Biol. #YEAR:1984#PUBMED:6504041#
938	FOLt2	folate transport via anion exchange	Transport, Extracellular		( 6573.1 ) or ( 6573.2 )	-1000	1000	4	IT	Ball, G.F.M#TITLE:Vitamins: Their Role in the Human Body#YEAR:2004#;Ganapathy V, Smith SB, Prasad PD.#TITLE:SLC19: the folate/thiamine transporter family.#JOURNAL:Pflugers Arch. #YEAR:2004#PUBMED:14770311#;Suh JR, Herbig AK, Stover PJ. #TITLE:New perspectives on folate catabolism. #JOURNAL:Annu Rev Nutr.#YEAR:2001#PUBMED:11375437#
939	FORt2m	formate mitochondrial transport	Transport, Mitochondrial			-1000	1000	1	NCD,IT
940	FORtr	FOR transporter, endoplasmic reticulum	Transport, Endoplasmic Reticular			-1000	1000	1	diffusion NJ
941	FPGS	folylpolyglutamate synthetase	Folate Metabolism	6.3.2.17	( 2356.1 )	0	1000	4	IT	Ball, G.F.M#TITLE:Vitamins: Their Role in the Human Body#YEAR:2004#;McGuire JJ, Russell CA, Balinska M.#TITLE:Human cytosolic and mitochondrial folylpolyglutamate synthetase are electrophoretically distinct. Expression in antifolate-sensitive and -resistant human cell lines.#JOURNAL: J Biol Chem.#YEAR:2000#PUBMED:10777604#
942	FPGS2	folylpolyglutamate synthetase	Folate Metabolism	6.3.2.17	( 2356.1 )	0	1000	4	IT	Ball, G.F.M#TITLE:Vitamins: Their Role in the Human Body#YEAR:2004#;McGuire JJ, Russell CA, Balinska M.#TITLE:Human cytosolic and mitochondrial folylpolyglutamate synthetase are electrophoretically distinct. Expression in antifolate-sensitive and -resistant human cell lines.#JOURNAL: J Biol Chem.#YEAR:2000#PUBMED:10777604#
943	FPGS2m	folylpolyglutamate synthetase, mitochondrial	Folate Metabolism	6.3.2.17	( 2356.1 )	0	1000	4	IT	Ball, G.F.M#TITLE:Vitamins: Their Role in the Human Body#YEAR:2004#;McGuire JJ, Russell CA, Balinska M.#TITLE:Human cytosolic and mitochondrial folylpolyglutamate synthetase are electrophoretically distinct. Expression in antifolate-sensitive and -resistant human cell lines.#JOURNAL: J Biol Chem.#YEAR:2000#PUBMED:10777604#
944	FPGS3	folylpolyglutamate synthetase	Folate Metabolism	6.3.2.17	( 2356.1 )	0	1000	4	IT	Ball, G.F.M#TITLE:Vitamins: Their Role in the Human Body#YEAR:2004#;McGuire JJ, Russell CA, Balinska M.#TITLE:Human cytosolic and mitochondrial folylpolyglutamate synthetase are electrophoretically distinct. Expression in antifolate-sensitive and -resistant human cell lines.#JOURNAL: J Biol Chem.#YEAR:2000#PUBMED:10777604#
945	FPGS3m	folylpolyglutamate synthetase, mitochondrial	Folate Metabolism	6.3.2.17	( 2356.1 )	0	1000	4	IT	Ball, G.F.M#TITLE:Vitamins: Their Role in the Human Body#YEAR:2004#;McGuire JJ, Russell CA, Balinska M.#TITLE:Human cytosolic and mitochondrial folylpolyglutamate synthetase are electrophoretically distinct. Expression in antifolate-sensitive and -resistant human cell lines.#JOURNAL: J Biol Chem.#YEAR:2000#PUBMED:10777604#
946	FPGS4	folylpolyglutamate synthetase (DHF)	Folate Metabolism	6.3.2.17	( 2356.1 )	0	1000	4	IT	Ball, G.F.M#TITLE:Vitamins: Their Role in the Human Body#YEAR:2004#;McGuire JJ, Russell CA, Balinska M.#TITLE:Human cytosolic and mitochondrial folylpolyglutamate synthetase are electrophoretically distinct. Expression in antifolate-sensitive and -resistant human cell lines.#JOURNAL: J Biol Chem.#YEAR:2000#PUBMED:10777604#
947	FPGS4m	folylpolyglutamate synthetase (DHF), mitochondrial	Folate Metabolism	6.3.2.17	( 2356.1 )	0	1000	4	IT	Ball, G.F.M#TITLE:Vitamins: Their Role in the Human Body#YEAR:2004#;McGuire JJ, Russell CA, Balinska M.#TITLE:Human cytosolic and mitochondrial folylpolyglutamate synthetase are electrophoretically distinct. Expression in antifolate-sensitive and -resistant human cell lines.#JOURNAL: J Biol Chem.#YEAR:2000#PUBMED:10777604#
948	FPGS5	folylpolyglutamate synthetase (DHF)	Folate Metabolism	6.3.2.17	( 2356.1 )	0	1000	4	IT	Ball, G.F.M#TITLE:Vitamins: Their Role in the Human Body#YEAR:2004#;McGuire JJ, Russell CA, Balinska M.#TITLE:Human cytosolic and mitochondrial folylpolyglutamate synthetase are electrophoretically distinct. Expression in antifolate-sensitive and -resistant human cell lines.#JOURNAL: J Biol Chem.#YEAR:2000#PUBMED:10777604#
949	FPGS5m	folylpolyglutamate synthetase (DHF), mitochondrial	Folate Metabolism	6.3.2.17	( 2356.1 )	0	1000	4	IT	Ball, G.F.M#TITLE:Vitamins: Their Role in the Human Body#YEAR:2004#;McGuire JJ, Russell CA, Balinska M.#TITLE:Human cytosolic and mitochondrial folylpolyglutamate synthetase are electrophoretically distinct. Expression in antifolate-sensitive and -resistant human cell lines.#JOURNAL: J Biol Chem.#YEAR:2000#PUBMED:10777604#
950	FPGS6	folylpolyglutamate synthetase (DHF)	Folate Metabolism	6.3.2.17	( 2356.1 )	0	1000	4	IT	Ball, G.F.M#TITLE:Vitamins: Their Role in the Human Body#YEAR:2004#;McGuire JJ, Russell CA, Balinska M.#TITLE:Human cytosolic and mitochondrial folylpolyglutamate synthetase are electrophoretically distinct. Expression in antifolate-sensitive and -resistant human cell lines.#JOURNAL: J Biol Chem.#YEAR:2000#PUBMED:10777604#
951	FPGS6m	folylpolyglutamate synthetase (DHF), mitochondrial	Folate Metabolism	6.3.2.17	( 2356.1 )	0	1000	4	IT	Ball, G.F.M#TITLE:Vitamins: Their Role in the Human Body#YEAR:2004#;McGuire JJ, Russell CA, Balinska M.#TITLE:Human cytosolic and mitochondrial folylpolyglutamate synthetase are electrophoretically distinct. Expression in antifolate-sensitive and -resistant human cell lines.#JOURNAL: J Biol Chem.#YEAR:2000#PUBMED:10777604#
952	FPGS7	folylpolyglutamate synthetase (10fthf)	Folate Metabolism	6.3.2.17	( 2356.1 )	0	1000	4	IT	Ball, G.F.M#TITLE:Vitamins: Their Role in the Human Body#YEAR:2004#;McGuire JJ, Russell CA, Balinska M.#TITLE:Human cytosolic and mitochondrial folylpolyglutamate synthetase are electrophoretically distinct. Expression in antifolate-sensitive and -resistant human cell lines.#JOURNAL: J Biol Chem.#YEAR:2000#PUBMED:10777604#
953	FPGS7m	folylpolyglutamate synthetase (10fthf), mitochondrial	Folate Metabolism	6.3.2.17	( 2356.1 )	0	1000	4	IT	Ball, G.F.M#TITLE:Vitamins: Their Role in the Human Body#YEAR:2004#;McGuire JJ, Russell CA, Balinska M.#TITLE:Human cytosolic and mitochondrial folylpolyglutamate synthetase are electrophoretically distinct. Expression in antifolate-sensitive and -resistant human cell lines.#JOURNAL: J Biol Chem.#YEAR:2000#PUBMED:10777604#
954	FPGS8	folylpolyglutamate synthetase (10fthf)	Folate Metabolism	6.3.2.17	( 2356.1 )	0	1000	4	IT	Ball, G.F.M#TITLE:Vitamins: Their Role in the Human Body#YEAR:2004#;McGuire JJ, Russell CA, Balinska M.#TITLE:Human cytosolic and mitochondrial folylpolyglutamate synthetase are electrophoretically distinct. Expression in antifolate-sensitive and -resistant human cell lines.#JOURNAL: J Biol Chem.#YEAR:2000#PUBMED:10777604#
955	FPGS8m	folylpolyglutamate synthetase (10fthf), mitochondrial	Folate Metabolism	6.3.2.17	( 2356.1 )	0	1000	4	IT	Ball, G.F.M#TITLE:Vitamins: Their Role in the Human Body#YEAR:2004#;McGuire JJ, Russell CA, Balinska M.#TITLE:Human cytosolic and mitochondrial folylpolyglutamate synthetase are electrophoretically distinct. Expression in antifolate-sensitive and -resistant human cell lines.#JOURNAL: J Biol Chem.#YEAR:2000#PUBMED:10777604#
956	FPGS9	folylpolyglutamate synthetase (10fthf)	Folate Metabolism	6.3.2.17	( 2356.1 )	0	1000	4	IT	Ball, G.F.M#TITLE:Vitamins: Their Role in the Human Body#YEAR:2004#;McGuire JJ, Russell CA, Balinska M.#TITLE:Human cytosolic and mitochondrial folylpolyglutamate synthetase are electrophoretically distinct. Expression in antifolate-sensitive and -resistant human cell lines.#JOURNAL: J Biol Chem.#YEAR:2000#PUBMED:10777604#
957	FPGS9m	folylpolyglutamate synthetase (10fthf), mitochondrial	Folate Metabolism	6.3.2.17	( 2356.1 )	0	1000	4	IT	Ball, G.F.M#TITLE:Vitamins: Their Role in the Human Body#YEAR:2004#;McGuire JJ, Russell CA, Balinska M.#TITLE:Human cytosolic and mitochondrial folylpolyglutamate synthetase are electrophoretically distinct. Expression in antifolate-sensitive and -resistant human cell lines.#JOURNAL: J Biol Chem.#YEAR:2000#PUBMED:10777604#
958	FPGSm	folylpolyglutamate synthetase, mitochondrial	Folate Metabolism	6.3.2.17	( 2356.1 )	0	1000	4	IT	Ball, G.F.M#TITLE:Vitamins: Their Role in the Human Body#YEAR:2004#;McGuire JJ, Russell CA, Balinska M.#TITLE:Human cytosolic and mitochondrial folylpolyglutamate synthetase are electrophoretically distinct. Expression in antifolate-sensitive and -resistant human cell lines.#JOURNAL: J Biol Chem.#YEAR:2000#PUBMED:10777604#
959	FRDPtc	lipid, flip-flop intracellular transport	N-Glycan Biosynthesis			-1000	1000	2	cholesterol precursor, transport by &quot;diffusion&quot; -&gt; actually beleived to be flip-flop mechanism (PMID: 12840657). See also Krisans (PMID: 14713247, PMID: 12121718) for synthesis of cholesterol pathway (why FRDP needs to be transported between ER and peroxisome) NJ	Hamilton JA.#TITLE:Fast flip-flop of cholesterol and fatty acids in membranes: implications for membrane transport proteins.#JOURNAL:Curr Opin Lipidol. #YEAR:2003#PUBMED:12840657#
960	FRDPtr	lipid, flip-flop intracellular transport	Transport, Peroxisomal			-1000	1000	2	cholesterol precursor, transport by &quot;diffusion&quot; -&gt; actually beleived to be flip-flop mechanism (PMID: 12840657). See also Krisans (PMID: 14713247, PMID: 12121718) for synthesis of cholesterol pathway (why FRDP needs to be transported between ER and peroxisome) NJ	Kovacs WJ, Olivier LM, Krisans SK.#TITLE:Central role of peroxisomes in isoprenoid biosynthesis.#JOURNAL:Prog Lipid Res.#YEAR:2002#PUBMED:12121718#;Kovacs WJ, Krisans S.#TITLE:Cholesterol biosynthesis and regulation: role of peroxisomes.#JOURNAL:Adv Exp Med Biol.#YEAR:2003#PUBMED:14713247#;Hamilton JA.#TITLE:Fast flip-flop of cholesterol and fatty acids in membranes: implications for membrane tra…
961	FRUt1r	D-fructose transport in via uniport	Transport, Extracellular		( 29988.1 ) or ( 6514.1 ) or ( 155184.1 ) or ( 6518.1 ) or ( 66035.1 )	-1000	1000	4	NCD	Hosokawa M, Thorens B#TITLE:Glucose release from GLUT2-null hepatocytes: characterization of a major and a minor pathway#JOURNAL:Am J Physiol Endocrinol Metab#YEAR:2002#PUBMED:11882499#;Guillam MT, Burcelin R, Thorens B#TITLE:Normal hepatic glucose production in the absence of GLUT2 reveals an alternative pathway for glucose release from hepatocytes#JOURNAL:Proc Natl Acad Sci U S A#YEAR:1998#PUBM…
962	FTHFCL	5-formethyltetrahydrofolate cyclo-ligase	Folate Metabolism	6.3.3.2	( 10588.1 )	0	1000	4	NCD	Anguera MC, Suh JR, Ghandour H, Nasrallah IM, Selhub J, Stover PJ.#TITLE:Methenyltetrahydrofolate synthetase regulates folate turnover and accumulation.#JOURNAL: J Biol Chem#YEAR:2003#PUBMED:12764149#
963	FTHFL	formate-tetrahydrofolate ligase	Folate Metabolism	6.3.4.3	( 4522.1 ) or ( 286297.1 )	-1000	1000	4	LOCUS:_4522#TRANSCRIPT:1#ABBREVIATION:MTHFD1#ECNUMBERS:1.5.1.5,3.5.4.9,6.3.4.3#	Devlin, TM#TITLE:Textbook of Biochemistry with Clinical Correlations#YEAR:2001#;Ball, G.F.M#TITLE:Vitamins: Their Role in the Human Body#YEAR:2004#
964	FTHFLm	formate-tetrahydrofolate ligase, mitochondrial	Folate Metabolism	6.3.4.3	( 25902.1 )	-1000	1000	4	NCD	Prasannan P, Pike S, Peng K, Shane B, Appling DR#TITLE:Human mitochondrial C1-tetrahydrofolate synthase: gene structure, tissue distribution of the mRNA, and immunolocalization in Chinese hamster ovary calls#JOURNAL:J Biol Chem#YEAR:2003#PUBMED:12937168#
965	FUCASE2ly	alpha-fucosidase, lysosomal	Keratan sulfate degradation	3.2.1.51	( 2517.1 )	0	1000	4	NCD	Johnson SW, Alhadeff JA.#TITLE:Mammalian alpha-L-fucosidases#JOURNAL:Comp Biochem Physiol B#YEAR:1991#PUBMED:1769200#;Occhiodoro T, Beckmann KR, Morris CP, Hopwood JJ#TITLE:Human alpha-L-fucosidase: complete coding sequence from cDNA clones#JOURNAL:Biochem Biophys Res Commun#YEAR:1989#PUBMED:2803312#;Fukushima H, de Wet JR, O&apos;Brien JS#TITLE:Molecular cloning of a cDNA for human alpha-L-fucos…
966	FUM	fumarase	Citric Acid Cycle	4.2.1.2	( 2271.1 )	-1000	1000	0	LOCUS:_2271#TRANSCRIPT:1#ABBREVIATION:FH#ECNUMBERS:4.2.1.2#
967	FUMAC	fumarylacetoacetase	Tyrosine metabolism	3.7.1.2	( 2184.1 )	0	1000	4	NCD	Metzler, David E#TITLE:Biochemistry : the chemical reactions of living cells 2 ed vol 2#YEAR:2001#
968	FUMSO3tm	Fumarate:sulfite antiport, mitochondrial	Transport, Mitochondrial		( 1468.1 )	-1000	1000	4	MM	Palmieri, F.#TITLE: The mitochondrial transporter family (SLC25): physiological and pathological implications.#JOURNAL: Pflugers Archive#YEAR:2004#PUBMED:14598172#;Crompton M, Palmieri F, Capano M, Quagliariello E.#TITLE:The transport of sulphate and sulphite in rat liver mitochondria. #YEAR:1974#PUBMED:4441366#
969	FUMSO4tm	Fumarate:sulfate antiport, mitochondrial	Transport, Mitochondrial		( 1468.1 )	-1000	1000	4	MM	Palmieri, F.#TITLE: The mitochondrial transporter family (SLC25): physiological and pathological implications.#JOURNAL: Pflugers Archive#YEAR:2004#PUBMED:14598172#;Crompton M, Palmieri F, Capano M, Quagliariello E.#TITLE:The transport of sulphate and sulphite in rat liver mitochondria. #YEAR:1974#PUBMED:4441366#
970	FUMtm	fumarate transport, mitochondrial	Transport, Mitochondrial		( 1468.1 )	-1000	1000	4	TDV	Palmieri, F.#TITLE: The mitochondrial transporter family (SLC25): physiological and pathological implications.#JOURNAL: Pflugers Archive#YEAR:2004#PUBMED:14598172#;Passarella S, Atlante A, Barile M, Quagliariello E.#TITLE:Anion transport in rat brain mitochondria: fumarate uptake via the dicarboxylate carrier. #JOURNAL:Neurochem Res.#YEAR:1987#PUBMED:3587497#
971	G12MT1_L	Glycolipid 1,2-alpha-D-mannosyltransferase (liver)	N-Glycan Biosynthesis	2.4.1.131		0	1000	0	NCD	Varki, Cummings, Esko, Freeze, Hart, Marth#TITLE:Essentials of Glycobiology#YEAR:1999#
972	G12MT1_U	Glycolipid 1,2-alpha-D-mannosyltransferase (uterus)	N-Glycan Biosynthesis	2.4.1.131		0	1000	0	NCD	Varki, Cummings, Esko, Freeze, Hart, Marth#TITLE:Essentials of Glycobiology#YEAR:1999#
973	G12MT2_L	Glycolipid 1,2-alpha-D-mannosyltransferase (liver)	N-Glycan Biosynthesis	2.4.1.131		0	1000	0	NCD	Varki, Cummings, Esko, Freeze, Hart, Marth#TITLE:Essentials of Glycobiology#YEAR:1999#
974	G12MT2_U	Glycolipid 1,2-alpha-D-mannosyltransferase (uterus)	N-Glycan Biosynthesis	2.4.1.131		0	1000	0	NCD	Varki, Cummings, Esko, Freeze, Hart, Marth#TITLE:Essentials of Glycobiology#YEAR:1999#
975	G13MT_L	Glycolipid 1,3-alpha-D-mannosyltransferase (liver)	N-Glycan Biosynthesis	2.4.1.132	( 85365.1 ) or ( 85365.2 )	0	1000	0	NCD
976	G13MT_U	Glycolipid 1,3-alpha-D-mannosyltransferase (uterus)	N-Glycan Biosynthesis	2.4.1.132	( 85365.1 ) or ( 85365.2 )	0	1000	0	NCD
977	G14T2g	beta-N-acetylglucosaminylglycopeptide beta-1,4-galactosyltransferase, Golgi	Keratan sulfate biosynthesis	2.4.1.38	( 8703.1 ) or ( 2683.1 ) or ( 8704.2 ) or ( 8704.1 ) or ( 9334.1 )	0	1000	4	Keratan sulfate II biosynthesis NCD	Varki, Cummings, Esko, Freeze, Hart, Marth#TITLE:Essentials of Glycobiology#YEAR:1999#;Mengle-Gaw L, McCoy-Haman MF, Tiemeier DC#TITLE:Genomic structure and expression of human beta-1,4-galactosyltransferase#JOURNAL:Biochem Biophys Res Commun#YEAR:1991#PUBMED:1903938#;Masri KA, Appert HE, Fukuda MN#TITLE:Identification of the full-length coding sequence for human galactosyltransferase (beta-N-ace…
978	G14T3g	beta-N-acetylglucosaminylglycopeptide beta-1,4-galactosyltransferase, Golgi	Keratan sulfate biosynthesis	2.4.1.38	( 8703.1 ) or ( 2683.1 ) or ( 8704.2 ) or ( 8704.1 ) or ( 9334.1 )	0	1000	4	Keratan sulfate II biosynthesis NCD	Varki, Cummings, Esko, Freeze, Hart, Marth#TITLE:Essentials of Glycobiology#YEAR:1999#;Mengle-Gaw L, McCoy-Haman MF, Tiemeier DC#TITLE:Genomic structure and expression of human beta-1,4-galactosyltransferase#JOURNAL:Biochem Biophys Res Commun#YEAR:1991#PUBMED:1903938#;Masri KA, Appert HE, Fukuda MN#TITLE:Identification of the full-length coding sequence for human galactosyltransferase (beta-N-ace…
979	G14T4g	beta-N-acetylglucosaminylglycopeptide beta-1,4-galactosyltransferase, Golgi	Keratan sulfate biosynthesis	2.4.1.38	( 8703.1 ) or ( 2683.1 ) or ( 8704.2 ) or ( 8704.1 ) or ( 9334.1 )	0	1000	4	Keratan sulfate II biosynthesis NCD	Varki, Cummings, Esko, Freeze, Hart, Marth#TITLE:Essentials of Glycobiology#YEAR:1999#;Mengle-Gaw L, McCoy-Haman MF, Tiemeier DC#TITLE:Genomic structure and expression of human beta-1,4-galactosyltransferase#JOURNAL:Biochem Biophys Res Commun#YEAR:1991#PUBMED:1903938#;Masri KA, Appert HE, Fukuda MN#TITLE:Identification of the full-length coding sequence for human galactosyltransferase (beta-N-ace…
980	G14T5g	beta-N-acetylglucosaminylglycopeptide beta-1,4-galactosyltransferase, Golgi	Keratan sulfate biosynthesis	2.4.1.38	( 9334.1 ) or ( 2683.1 ) or ( 8704.2 ) or ( 8704.1 ) or ( 8703.1 )	0	1000	4	Keratan sulfate II biosynthesis NCD	Varki, Cummings, Esko, Freeze, Hart, Marth#TITLE:Essentials of Glycobiology#YEAR:1999#;Mengle-Gaw L, McCoy-Haman MF, Tiemeier DC#TITLE:Genomic structure and expression of human beta-1,4-galactosyltransferase#JOURNAL:Biochem Biophys Res Commun#YEAR:1991#PUBMED:1903938#;Masri KA, Appert HE, Fukuda MN#TITLE:Identification of the full-length coding sequence for human galactosyltransferase (beta-N-ace…
981	G16MT_L	Glycolipid 1,6-alpha-D-mannosyltransferase (liver)	N-Glycan Biosynthesis			0	1000	0	EC 2.4.1.- NCD	Varki, Cummings, Esko, Freeze, Hart, Marth#TITLE:Essentials of Glycobiology#YEAR:1999#
982	G16MT_U	Glycolipid 1,6-alpha-D-mannosyltransferase (uterus)	N-Glycan Biosynthesis			0	1000	0	EC 2.4.1.- NCD	Varki, Cummings, Esko, Freeze, Hart, Marth#TITLE:Essentials of Glycobiology#YEAR:1999#
983	G1M7MASNBterg	g1m7masnC endoplasmic reticulum to Golgi transport	N-Glycan Biosynthesis			0	1000	0	NCD	Spiro RG#TITLE:Glucose residues as key determinants in the biosynthesis and quality control of glycoproteins with N-linked oligosaccharides.#JOURNAL:J Biol Chem#YEAR:2000#PUBMED:11007802#
984	G3M8MASNterg	g3m8masn transport from endoplasmic reticulum to Golgi apparatus	N-Glycan Biosynthesis			0	1000	0	NCD	Spiro RG#TITLE:Glucose residues as key determinants in the biosynthesis and quality control of glycoproteins with N-linked oligosaccharides.#JOURNAL:J Biol Chem#YEAR:2000#PUBMED:11007802#
985	G3PD1	glycerol-3-phosphate dehydrogenase (NAD)	Glycerophospholipid Metabolism	1.1.1.94	( 2819.1 )	-1000	1000	4	NAD-specific; see also G3PD2	Voet D, Voet JG#TITLE:Biochemistry#YEAR:1995#;Salway, JG#TITLE:Metabolism at a Glance, 2nd ed#YEAR:1999#;Murray RK, Granner DK, Mayes PA, Rodwell VW#TITLE:Harper&apos;s Biochemistry#YEAR:1999#;Menaya J, Gonzalez-Manchon C, Parrilla R, Ayuso MS.#TITLE:Molecular cloning, sequencing and expression of a cDNA encoding a human liver NAD-dependent alpha-glycerol-3-phosphate dehydrogenase.#JOURNAL:Biochi…
986	G3PD2m	glycerol-3-phosphate dehydrogenase (FAD), mitochondrial	Glycolysis/Gluconeogenesis	1.1.99.5	( 2820.1 )	0	1000	2	replaces old version which contains redundant metabolite (gly3p) NCD split compartmentation NJ	Ferrer J, Aoki M, Behn P, Nestorowicz A, Riggs A, Permutt MA.#TITLE:Mitochondrial glycerol-3-phosphate dehydrogenase. Cloning of an alternatively spliced human islet-cell cDNA, tissue distribution, physical mapping, and identification of a polymorphic genetic marker.#JOURNAL:Diabetes#YEAR:1996#PUBMED:8549872#;Brisson D, Vohl MC, St-Pierre J, Hudson TJ, Gaudet D.#TITLE:Glycerol: a neglected variab…
987	G5SADs	L-glutamate 5-semialdehyde dehydratase (spontaneous)	Urea cycle/amino group metabolism			0	1000	2	Needed in L-proline biosynthesis	Hu CA, Lin WW, Obie C, Valle D#TITLE:Molecular enzymology of mammalian Delta1-pyrroline-5-carboxylate synthase. Alternative splice donor utilization generates isoforms with different sensitivity to ornithine inhibition#JOURNAL:J Biol Chem#YEAR:1999#PUBMED:10037775#
988	G5SDym	glutamate-5-semialdehyde dehydrogenase (m)	Urea cycle/amino group metabolism	1.2.1.41	( 5832.1 )	0	1000	2	SAB m TDV: name change from G5SDm	Hu CA, Lin WW, Obie C, Valle D#TITLE:Molecular enzymology of mammalian Delta1-pyrroline-5-carboxylate synthase. Alternative splice donor utilization generates isoforms with different sensitivity to ornithine inhibition#JOURNAL:J Biol Chem#YEAR:1999#PUBMED:10037775#
989	G6PDA	glucosamine-6-phosphate deaminase	Aminosugar Metabolism	3.5.99.6	( 132789.1 ) or ( 10007.1 )	0	1000	4	Previously EC 5.3.1.10	Varki, Cummings, Esko, Freeze, Hart, Marth#TITLE:Essentials of Glycobiology#YEAR:1999#;Shevchenko V, Hogben M, Ekong R, Parrington J, Lai FA#TITLE:The human glucosamine-6-phosphate deaminase gene: cDNA cloning and expression, genomic organization and chromosomal localization#JOURNAL:Gene#YEAR:1998#PUBMED:9714720#
990	G6PDH1er	glucose-6-phosphate dehydrogenase, endoplasmic reticulum	Pentose Phosphate Pathway		( 9563.1 )	0	1000	4	tv, jp NCD	Mason PJ, Stevens D, Diez A, Knight SW, Scopes DA, Vulliamy TJ.#TITLE:Human hexose-6-phosphate dehydrogenase (glucose 1-dehydrogenase) encoded at 1p36: coding sequence and expression.#JOURNAL: Blood Cells Mol Dis#YEAR:1999#PUBMED:10349511#;Clarke JL, Mason PJ#TITLE:Murine hexose-6-phosphate dehydrogenase: a bifunctional enzyme with broad substrate specificity and 6-phosphogluconolactonase activit…
991	G6PDH2r	glucose 6-phosphate dehydrogenase	Pentose Phosphate Pathway	1.1.1.49	( 2539.1 )	0	45.3648	0	JLR - a reversible reaction that is otherwise identical to ZWF	Salway, JG#TITLE:Metabolism at a Glance, 2nd ed#YEAR:1999#;Orten JM, Neuhaus OW.#TITLE:Human Biochemistry#YEAR:1975#
992	G6PDH2rer	glucose 6-phosphate dehydrogenase, endoplasmic reticulum	Pentose Phosphate Pathway		( 9563.1 )	-1000	1000	4	NCD	Salway, JG#TITLE:Metabolism at a Glance, 2nd ed#YEAR:1999#;Orten JM, Neuhaus OW.#TITLE:Human Biochemistry#YEAR:1975#;Mason PJ, Stevens D, Diez A, Knight SW, Scopes DA, Vulliamy TJ.#TITLE:Human hexose-6-phosphate dehydrogenase (glucose 1-dehydrogenase) encoded at 1p36: coding sequence and expression.#JOURNAL: Blood Cells Mol Dis#YEAR:1999#PUBMED:10349511#;Clarke JL, Mason PJ#TITLE:Murine hexose-6-…
993	G6PPer	glucose-6-phosphate phosphatase, edoplasmic reticular	Glycolysis/Gluconeogenesis	3.1.3.9	( 57818.1 ) or ( 2538.1 ) or ( 92579.1 )	0	1000	4	NCD	Pan CJ, Lei KJ, Annabi B, Hemrika W, Chou JY#TITLE:Transmembrane topology of glucose-6-phosphatase.#JOURNAL:J Biol Chem#YEAR:1998#PUBMED:9497333#;Nordlie, R.C. and Sukalski, K.A.#TITLE:The Enzymes of Biological Membranes#YEAR:1985#;Lei KJ, Shelly LL, Pan CJ, Sidbury JB, Chou JY#TITLE:Mutations in the glucose-6-phosphatase gene that cause glycogen storage disease type 1a#JOURNAL:Science#YEAR:1993#…
994	GABAVESSEC	GABA secretion via secretory vesicle (ATP driven)	Transport, Extracellular		( 140679.1 )	0	1000	4	SAB This reaction represents the ATP driven secretion of glu from the cell. It leaves out the vesicle because a compartment is not available for that. ATP demand is not known for sure stoichiometrically, but 1:1 H coupling ratio is assumed, which could translate to 3 GABA/ATP.	Gasnier B#TITLE:The SLC32 transporter, a key protein for the synaptic release of inhibitory amino acids#JOURNAL:Pflugers Arch#YEAR:2004#PUBMED:12750892#;Wagner CA, Finberg KE, Breton S, Marshansky V, Brown D, Geibel JP#TITLE:Renal vacuolar H+-ATPase#JOURNAL:Physiol Rev#YEAR:2004#PUBMED:15383652#
995	GACMTRc	guanidinoacetate N-methyltransferase (c)	Urea cycle/amino group metabolism	2.1.1.2	( 2593.1 ) or ( 2593.2 )	-1000	1000	4	SAB c	Pegg AE, Nagarajan S, Naficy S, Ganem B#TITLE:Role of unsaturated derivatives of spermidine as substrates for spermine synthase and in supporting growth of SV-3T3 cells#JOURNAL:Biochem J#YEAR:1991#PUBMED:2001229#
996	GACPAILter	glucosaminyl-acylphosphatidylinositol ER flippase	Transport, Endoplasmic Reticular			0	1000	0	NCD	Murakami Y, Siripanyapinyo U, Hong Y, Kang JY, Ishihara S, Nakakuma H, Maeda Y, Kinoshita T#TITLE:PIG-W is critical for inositol acylation but not for flipping of glycosylphosphatidylinositol-anchor#JOURNAL:Mol Biol Cell#YEAR:2003#PUBMED:14517336#
997	GAL3ST11	Galactosylceramide sulfotransferase	Sphingolipid Metabolism	2.8.2.11	( 9514.1 )	0	1000	4	NJ	Voet D, Voet JG#TITLE:Biochemistry#YEAR:1995#;Kolter T, Sandhoff K#TITLE:Recent advances in the biochemistry of sphingolipidoses#JOURNAL:Brain Pathology#YEAR:1998#;Honke K, Tsuda M, Hirahara Y, Ishii A, Makita A, Wada Y.#TITLE:Molecular cloning and expression of cDNA encoding human 3&apos;-phosphoadenylylsulfate:galactosylceramide 3&apos;-sulfotransferase.#JOURNAL:J Biol Chem#YEAR:1997#PUBMED:903…
998	GALASE10ly	beta-galactosidase, lysosomal	Keratan sulfate degradation	3.2.1.23	( 5476.1 ) and ( 2720.1 ) and ( 2588.1 ) and ( 4758.1 ) or ( 5476.1 ) and ( 2720.1 )	0	1000	4	NCD	Oshima A, Tsuji A, Nagao Y, Sakuraba H, Suzuki Y.#TITLE:Cloning, sequencing, and expression of cDNA for human beta-galactosidase.#JOURNAL:Biochem Biophys Res Commun#YEAR:1988#PUBMED:3143362#;Lim CT, Horwitz AL#TITLE:Purification and properties of human N-acetylgalactosamine-6-sulfate sulfatase#JOURNAL:Biochim Biophys Acta#YEAR:1981#PUBMED:7213753#;Glossl J, Truppe W, Kresse H#TITLE:Purification a…
999	GALASE11ly	beta-galactosidase, lysosomal	Keratan sulfate degradation	3.2.1.23	( 5476.1 ) and ( 2720.1 ) and ( 2588.1 ) and ( 4758.1 ) or ( 5476.1 ) and ( 2720.1 )	0	1000	4	NCD	Oshima A, Tsuji A, Nagao Y, Sakuraba H, Suzuki Y.#TITLE:Cloning, sequencing, and expression of cDNA for human beta-galactosidase.#JOURNAL:Biochem Biophys Res Commun#YEAR:1988#PUBMED:3143362#;Lim CT, Horwitz AL#TITLE:Purification and properties of human N-acetylgalactosamine-6-sulfate sulfatase#JOURNAL:Biochim Biophys Acta#YEAR:1981#PUBMED:7213753#;Glossl J, Truppe W, Kresse H#TITLE:Purification a…
1000	GALASE12ly	beta-galactosidase, lysosomal	Keratan sulfate degradation	3.2.1.23	( 5476.1 ) and ( 2720.1 ) and ( 2588.1 ) and ( 4758.1 ) or ( 5476.1 ) and ( 2720.1 )	0	1000	4	NCD	Oshima A, Tsuji A, Nagao Y, Sakuraba H, Suzuki Y.#TITLE:Cloning, sequencing, and expression of cDNA for human beta-galactosidase.#JOURNAL:Biochem Biophys Res Commun#YEAR:1988#PUBMED:3143362#;Lim CT, Horwitz AL#TITLE:Purification and properties of human N-acetylgalactosamine-6-sulfate sulfatase#JOURNAL:Biochim Biophys Acta#YEAR:1981#PUBMED:7213753#;Glossl J, Truppe W, Kresse H#TITLE:Purification a…
1001	GALASE13ly	beta-galactosidase, lysosomal	Keratan sulfate degradation	3.2.1.23	( 5476.1 ) and ( 2720.1 ) and ( 2588.1 ) and ( 4758.1 ) or ( 5476.1 ) and ( 2720.1 )	0	1000	4	NCD	Oshima A, Tsuji A, Nagao Y, Sakuraba H, Suzuki Y.#TITLE:Cloning, sequencing, and expression of cDNA for human beta-galactosidase.#JOURNAL:Biochem Biophys Res Commun#YEAR:1988#PUBMED:3143362#;Lim CT, Horwitz AL#TITLE:Purification and properties of human N-acetylgalactosamine-6-sulfate sulfatase#JOURNAL:Biochim Biophys Acta#YEAR:1981#PUBMED:7213753#;Glossl J, Truppe W, Kresse H#TITLE:Purification a…
1002	GALASE14ly	beta-galactosidase, lysosomal	Keratan sulfate degradation	3.2.1.23	( 5476.1 ) and ( 2720.1 ) and ( 2588.1 ) and ( 4758.1 ) or ( 5476.1 ) and ( 2720.1 )	0	1000	4	NCD	Oshima A, Tsuji A, Nagao Y, Sakuraba H, Suzuki Y.#TITLE:Cloning, sequencing, and expression of cDNA for human beta-galactosidase.#JOURNAL:Biochem Biophys Res Commun#YEAR:1988#PUBMED:3143362#;Lim CT, Horwitz AL#TITLE:Purification and properties of human N-acetylgalactosamine-6-sulfate sulfatase#JOURNAL:Biochim Biophys Acta#YEAR:1981#PUBMED:7213753#;Glossl J, Truppe W, Kresse H#TITLE:Purification a…
1003	GALASE15ly	beta-galactosidase, lysosomal	Keratan sulfate degradation	3.2.1.23	( 5476.1 ) and ( 2720.1 ) and ( 2588.1 ) and ( 4758.1 ) or ( 5476.1 ) and ( 2720.1 )	0	1000	4	NCD	Oshima A, Tsuji A, Nagao Y, Sakuraba H, Suzuki Y.#TITLE:Cloning, sequencing, and expression of cDNA for human beta-galactosidase.#JOURNAL:Biochem Biophys Res Commun#YEAR:1988#PUBMED:3143362#;Lim CT, Horwitz AL#TITLE:Purification and properties of human N-acetylgalactosamine-6-sulfate sulfatase#JOURNAL:Biochim Biophys Acta#YEAR:1981#PUBMED:7213753#;Glossl J, Truppe W, Kresse H#TITLE:Purification a…
1004	GALASE16ly	beta-galactosidase, lysosomal	Keratan sulfate degradation	3.2.1.23	( 5476.1 ) and ( 2720.1 ) and ( 2588.1 ) and ( 4758.1 ) or ( 5476.1 ) and ( 2720.1 )	0	1000	4	NCD	Oshima A, Tsuji A, Nagao Y, Sakuraba H, Suzuki Y.#TITLE:Cloning, sequencing, and expression of cDNA for human beta-galactosidase.#JOURNAL:Biochem Biophys Res Commun#YEAR:1988#PUBMED:3143362#;Lim CT, Horwitz AL#TITLE:Purification and properties of human N-acetylgalactosamine-6-sulfate sulfatase#JOURNAL:Biochim Biophys Acta#YEAR:1981#PUBMED:7213753#;Glossl J, Truppe W, Kresse H#TITLE:Purification a…
1005	GALASE17ly	beta-galactosidase, lysosomal	Keratan sulfate degradation	3.2.1.23	( 5476.1 ) and ( 2720.1 ) and ( 2588.1 ) and ( 4758.1 ) or ( 5476.1 ) and ( 2720.1 )	0	1000	4	NCD	Oshima A, Tsuji A, Nagao Y, Sakuraba H, Suzuki Y.#TITLE:Cloning, sequencing, and expression of cDNA for human beta-galactosidase.#JOURNAL:Biochem Biophys Res Commun#YEAR:1988#PUBMED:3143362#;Lim CT, Horwitz AL#TITLE:Purification and properties of human N-acetylgalactosamine-6-sulfate sulfatase#JOURNAL:Biochim Biophys Acta#YEAR:1981#PUBMED:7213753#;Glossl J, Truppe W, Kresse H#TITLE:Purification a…
1006	GALASE18ly	beta-galactosidase, lysosomal	Keratan sulfate degradation	3.2.1.23	( 5476.1 ) and ( 2720.1 ) and ( 2588.1 ) and ( 4758.1 ) or ( 5476.1 ) and ( 2720.1 )	0	1000	4	NCD	Oshima A, Tsuji A, Nagao Y, Sakuraba H, Suzuki Y.#TITLE:Cloning, sequencing, and expression of cDNA for human beta-galactosidase.#JOURNAL:Biochem Biophys Res Commun#YEAR:1988#PUBMED:3143362#;Lim CT, Horwitz AL#TITLE:Purification and properties of human N-acetylgalactosamine-6-sulfate sulfatase#JOURNAL:Biochim Biophys Acta#YEAR:1981#PUBMED:7213753#;Glossl J, Truppe W, Kresse H#TITLE:Purification a…
1007	GALASE19ly	beta-galactosidase, lysosomal	Keratan sulfate degradation	3.2.1.23	( 5476.1 ) and ( 2720.1 ) and ( 2588.1 ) and ( 4758.1 ) or ( 5476.1 ) and ( 2720.1 )	0	1000	4	NCD	Oshima A, Tsuji A, Nagao Y, Sakuraba H, Suzuki Y.#TITLE:Cloning, sequencing, and expression of cDNA for human beta-galactosidase.#JOURNAL:Biochem Biophys Res Commun#YEAR:1988#PUBMED:3143362#;Lim CT, Horwitz AL#TITLE:Purification and properties of human N-acetylgalactosamine-6-sulfate sulfatase#JOURNAL:Biochim Biophys Acta#YEAR:1981#PUBMED:7213753#;Glossl J, Truppe W, Kresse H#TITLE:Purification a…
1008	GALASE1ly	beta-galactosidase, lysosomal	N-Glycan Degradation	3.2.1.23	( 5476.1 ) and ( 2720.1 ) and ( 2588.1 ) and ( 4758.1 ) or ( 5476.1 ) and ( 2720.1 )	0	1000	4	NCD	Oshima A, Tsuji A, Nagao Y, Sakuraba H, Suzuki Y.#TITLE:Cloning, sequencing, and expression of cDNA for human beta-galactosidase.#JOURNAL:Biochem Biophys Res Commun#YEAR:1988#PUBMED:3143362#;Lim CT, Horwitz AL#TITLE:Purification and properties of human N-acetylgalactosamine-6-sulfate sulfatase#JOURNAL:Biochim Biophys Acta#YEAR:1981#PUBMED:7213753#;Glossl J, Truppe W, Kresse H#TITLE:Purification a…
1009	GALASE20ly	beta-galactosidase, lysosomal	Keratan sulfate degradation	3.2.1.23	( 5476.1 ) and ( 2720.1 ) and ( 2588.1 ) and ( 4758.1 ) or ( 5476.1 ) and ( 2720.1 )	0	1000	4	NCD	Oshima A, Tsuji A, Nagao Y, Sakuraba H, Suzuki Y.#TITLE:Cloning, sequencing, and expression of cDNA for human beta-galactosidase.#JOURNAL:Biochem Biophys Res Commun#YEAR:1988#PUBMED:3143362#;Lim CT, Horwitz AL#TITLE:Purification and properties of human N-acetylgalactosamine-6-sulfate sulfatase#JOURNAL:Biochim Biophys Acta#YEAR:1981#PUBMED:7213753#;Glossl J, Truppe W, Kresse H#TITLE:Purification a…
1010	GALASE3ly	beta-galactosidase, lysosomal	Keratan sulfate degradation	3.2.1.23	( 5476.1 ) and ( 2720.1 ) and ( 2588.1 ) and ( 4758.1 ) or ( 5476.1 ) and ( 2720.1 )	0	1000	4	NCD	Oshima A, Tsuji A, Nagao Y, Sakuraba H, Suzuki Y.#TITLE:Cloning, sequencing, and expression of cDNA for human beta-galactosidase.#JOURNAL:Biochem Biophys Res Commun#YEAR:1988#PUBMED:3143362#;Lim CT, Horwitz AL#TITLE:Purification and properties of human N-acetylgalactosamine-6-sulfate sulfatase#JOURNAL:Biochim Biophys Acta#YEAR:1981#PUBMED:7213753#;Glossl J, Truppe W, Kresse H#TITLE:Purification a…
1011	GALASE4ly	beta-galactosidase, lysosomal	Keratan sulfate degradation	3.2.1.23	( 5476.1 ) and ( 2720.1 ) and ( 2588.1 ) and ( 4758.1 ) or ( 5476.1 ) and ( 2720.1 )	0	1000	4	NCD	Oshima A, Tsuji A, Nagao Y, Sakuraba H, Suzuki Y.#TITLE:Cloning, sequencing, and expression of cDNA for human beta-galactosidase.#JOURNAL:Biochem Biophys Res Commun#YEAR:1988#PUBMED:3143362#;Lim CT, Horwitz AL#TITLE:Purification and properties of human N-acetylgalactosamine-6-sulfate sulfatase#JOURNAL:Biochim Biophys Acta#YEAR:1981#PUBMED:7213753#;Glossl J, Truppe W, Kresse H#TITLE:Purification a…
1012	GALASE5ly	beta-galactosidase, lysosomal	Keratan sulfate degradation	3.2.1.23	( 5476.1 ) and ( 2720.1 ) and ( 2588.1 ) and ( 4758.1 ) or ( 5476.1 ) and ( 2720.1 )	0	1000	4	NCD	Oshima A, Tsuji A, Nagao Y, Sakuraba H, Suzuki Y.#TITLE:Cloning, sequencing, and expression of cDNA for human beta-galactosidase.#JOURNAL:Biochem Biophys Res Commun#YEAR:1988#PUBMED:3143362#;Lim CT, Horwitz AL#TITLE:Purification and properties of human N-acetylgalactosamine-6-sulfate sulfatase#JOURNAL:Biochim Biophys Acta#YEAR:1981#PUBMED:7213753#;Glossl J, Truppe W, Kresse H#TITLE:Purification a…
1013	GALASE6ly	beta-galactosidase, lysosomal	Keratan sulfate degradation	3.2.1.23	( 5476.1 ) and ( 2720.1 ) and ( 2588.1 ) and ( 4758.1 ) or ( 5476.1 ) and ( 2720.1 )	0	1000	4	NCD	Oshima A, Tsuji A, Nagao Y, Sakuraba H, Suzuki Y.#TITLE:Cloning, sequencing, and expression of cDNA for human beta-galactosidase.#JOURNAL:Biochem Biophys Res Commun#YEAR:1988#PUBMED:3143362#;Lim CT, Horwitz AL#TITLE:Purification and properties of human N-acetylgalactosamine-6-sulfate sulfatase#JOURNAL:Biochim Biophys Acta#YEAR:1981#PUBMED:7213753#;Glossl J, Truppe W, Kresse H#TITLE:Purification a…
1014	GALASE7ly	beta-galactosidase, lysosomal	Keratan sulfate degradation	3.2.1.23	( 5476.1 ) and ( 2720.1 ) and ( 2588.1 ) and ( 4758.1 ) or ( 5476.1 ) and ( 2720.1 )	0	1000	4	NCD	Oshima A, Tsuji A, Nagao Y, Sakuraba H, Suzuki Y.#TITLE:Cloning, sequencing, and expression of cDNA for human beta-galactosidase.#JOURNAL:Biochem Biophys Res Commun#YEAR:1988#PUBMED:3143362#;Lim CT, Horwitz AL#TITLE:Purification and properties of human N-acetylgalactosamine-6-sulfate sulfatase#JOURNAL:Biochim Biophys Acta#YEAR:1981#PUBMED:7213753#;Glossl J, Truppe W, Kresse H#TITLE:Purification a…
1015	GALASE8ly	beta-galactosidase, lysosomal	Keratan sulfate degradation	3.2.1.23	( 5476.1 ) and ( 2720.1 ) and ( 2588.1 ) and ( 4758.1 ) or ( 5476.1 ) and ( 2720.1 )	0	1000	4	NCD	Oshima A, Tsuji A, Nagao Y, Sakuraba H, Suzuki Y.#TITLE:Cloning, sequencing, and expression of cDNA for human beta-galactosidase.#JOURNAL:Biochem Biophys Res Commun#YEAR:1988#PUBMED:3143362#;Lim CT, Horwitz AL#TITLE:Purification and properties of human N-acetylgalactosamine-6-sulfate sulfatase#JOURNAL:Biochim Biophys Acta#YEAR:1981#PUBMED:7213753#;Glossl J, Truppe W, Kresse H#TITLE:Purification a…
1016	GALASE9ly	beta-galactosidase, lysosomal	Keratan sulfate degradation	3.2.1.23	( 5476.1 ) and ( 2720.1 ) and ( 2588.1 ) and ( 4758.1 ) or ( 5476.1 ) and ( 2720.1 )	0	1000	4	NCD	Oshima A, Tsuji A, Nagao Y, Sakuraba H, Suzuki Y.#TITLE:Cloning, sequencing, and expression of cDNA for human beta-galactosidase.#JOURNAL:Biochem Biophys Res Commun#YEAR:1988#PUBMED:3143362#;Lim CT, Horwitz AL#TITLE:Purification and properties of human N-acetylgalactosamine-6-sulfate sulfatase#JOURNAL:Biochim Biophys Acta#YEAR:1981#PUBMED:7213753#;Glossl J, Truppe W, Kresse H#TITLE:Purification a…
1017	GALGLUSIDEtg	galgluside hs intracellular transport	Transport, Golgi Apparatus			-1000	1000	1	unknown mechanism for transport - however must get to other intracellular compartments (e.g. lysosome for degradation) NJ
1018	GALGLUSIDEtl	galgluside hs intracellular transport	Transport, Lysosomal			-1000	1000	1	unknown mechanism for transport - however must get to other intracellular compartments (e.g. lysosome for degradation) NJ
1019	GALGT1	Beta-1,4 N-acetylgalactosaminyltransferase	Sphingolipid Metabolism	2.4.1.92	( 2583.1 )	0	1000	4	NJ	Kolter T, Sandhoff K#TITLE:Recent advances in the biochemistry of sphingolipidoses#JOURNAL:Brain Pathology#YEAR:1998#;Furukawa K, Soejima H, Niikawa N, Shiku H.#TITLE:Genomic organization and chromosomal assignment of the human beta1, 4-N-acetylgalactosaminyltransferase gene. Identification of multiple transcription units.#JOURNAL:J Biol Chem#YEAR:1996#PUBMED:8702839#;Nagata Y, Yamashiro S, Yodoi…
1020	GALGT2	Beta-1,4 N-acetylgalactosaminyltransferase	Sphingolipid Metabolism	2.4.1.92	( 2583.1 )	0	1000	4	NJ	Kolter T, Sandhoff K#TITLE:Recent advances in the biochemistry of sphingolipidoses#JOURNAL:Brain Pathology#YEAR:1998#;Nagata Y, Yamashiro S, Yodoi J, Lloyd KO, Shiku H, Furukawa K.#TITLE:Expression cloning of beta 1,4 N-acetylgalactosaminyltransferase cDNAs that determine the expression of GM2 and GD2 gangliosides.#JOURNAL:J Biol Chem#YEAR:1992#PUBMED:1601877#
1021	GALGT3	Beta-1,4 N-acetylgalactosaminyltransferase	Sphingolipid Metabolism	2.4.1.92	( 2583.1 )	0	1000	4	NJ	Kolter T, Sandhoff K#TITLE:Recent advances in the biochemistry of sphingolipidoses#JOURNAL:Brain Pathology#YEAR:1998#;Nagata Y, Yamashiro S, Yodoi J, Lloyd KO, Shiku H, Furukawa K.#TITLE:Expression cloning of beta 1,4 N-acetylgalactosaminyltransferase cDNAs that determine the expression of GM2 and GD2 gangliosides.#JOURNAL:J Biol Chem#YEAR:1992#PUBMED:1601877#
1022	GALGT4	Beta-1,4 N-acetylgalactosaminyltransferase	Sphingolipid Metabolism	2.4.1.92	( 2583.1 )	0	1000	4	NJ	Kolter T, Sandhoff K#TITLE:Recent advances in the biochemistry of sphingolipidoses#JOURNAL:Brain Pathology#YEAR:1998#;Nagata Y, Yamashiro S, Yodoi J, Lloyd KO, Shiku H, Furukawa K.#TITLE:Expression cloning of beta 1,4 N-acetylgalactosaminyltransferase cDNAs that determine the expression of GM2 and GD2 gangliosides.#JOURNAL:J Biol Chem#YEAR:1992#PUBMED:1601877#
1023	GALK	galactokinase	Galactose metabolism	2.7.1.6	( 2584.1 ) or ( 2585.2 ) or ( 2585.1 )	0	1000	0	LOCUS:_2584#TRANSCRIPT:1#ABBREVIATION:GALK1#ECNUMBERS:2.7.1.6#
1024	GALNACT1g	UDPGal-chondroitin acetylgalactosaminyltransferase I, Golgi	Chondroitin / heparan sulfate biosynthesis	2.4.1.174	( 55790.1 ) or ( 55454.1 )	0	1000	4	NCD	Silbert JE, Sugumaran G#TITLE:Biosynthesis of chondroitin/dermatan sulfate#JOURNAL:IUBMB Life#YEAR:2002#PUBMED:12512856#;Sato T, Gotoh M, Kiyohara K, Akashima T, Iwasaki H, Kameyama A, Mochizuki H, Yada T, Inaba N, Togayachi A, Kudo T, Asada M, Watanabe H, Imamura T, Kimata K, Narimatsu H#TITLE:Differential roles of two N-acetylgalactosaminyltransferases, CSGalNAcT-1, and a novel enzyme, CSGalNAc…
1025	GALNACT2g	uridine diphosphoacetylgalactosamine-chondroitin acetylgalactosaminyltransferase II, Golgi	Chondroitin / heparan sulfate biosynthesis	2.4.1.175	( 55790.1 ) or ( 79586.1 ) and ( 22856.1 ) or ( 55454.1 ) or ( 337876.1 )	0	1000	4	NCD	Silbert JE, Sugumaran G#TITLE:Biosynthesis of chondroitin/dermatan sulfate#JOURNAL:IUBMB Life#YEAR:2002#PUBMED:12512856#;Sato T, Gotoh M, Kiyohara K, Akashima T, Iwasaki H, Kameyama A, Mochizuki H, Yada T, Inaba N, Togayachi A, Kudo T, Asada M, Watanabe H, Imamura T, Kimata K, Narimatsu H#TITLE:Differential roles of two N-acetylgalactosaminyltransferases, CSGalNAcT-1, and a novel enzyme, CSGalNAc…
1026	GALNACT3g	uridine diphosphoacetylgalactosamine-chondroitin acetylgalactosaminyltransferase II, Golgi	Chondroitin / heparan sulfate biosynthesis	2.4.1.175	( 55790.1 ) or ( 79586.1 ) and ( 22856.1 ) or ( 55454.1 ) or ( 337876.1 )	0	1000	4	NCD	Silbert JE, Sugumaran G#TITLE:Biosynthesis of chondroitin/dermatan sulfate#JOURNAL:IUBMB Life#YEAR:2002#PUBMED:12512856#;Sato T, Gotoh M, Kiyohara K, Akashima T, Iwasaki H, Kameyama A, Mochizuki H, Yada T, Inaba N, Togayachi A, Kudo T, Asada M, Watanabe H, Imamura T, Kimata K, Narimatsu H#TITLE:Differential roles of two N-acetylgalactosaminyltransferases, CSGalNAcT-1, and a novel enzyme, CSGalNAc…
1027	GALNACT4g	uridine diphosphoacetylgalactosamine-chondroitin acetylgalactosaminyltransferase II, Golgi	Chondroitin / heparan sulfate biosynthesis	2.4.1.175	( 55790.1 ) or ( 79586.1 ) and ( 22856.1 ) or ( 55454.1 ) or ( 337876.1 )	0	1000	4	NCD	Silbert JE, Sugumaran G#TITLE:Biosynthesis of chondroitin/dermatan sulfate#JOURNAL:IUBMB Life#YEAR:2002#PUBMED:12512856#;Sato T, Gotoh M, Kiyohara K, Akashima T, Iwasaki H, Kameyama A, Mochizuki H, Yada T, Inaba N, Togayachi A, Kudo T, Asada M, Watanabe H, Imamura T, Kimata K, Narimatsu H#TITLE:Differential roles of two N-acetylgalactosaminyltransferases, CSGalNAcT-1, and a novel enzyme, CSGalNAc…
1028	GALNACT5g	uridine diphosphoacetylgalactosamine-chondroitin acetylgalactosaminyltransferase II, Golgi	Chondroitin / heparan sulfate biosynthesis	2.4.1.175	( 55454.1 ) or ( 55790.1 ) or ( 337876.1 ) or ( 79586.1 ) and ( 22856.1 )	0	1000	4	NCD	Silbert JE, Sugumaran G#TITLE:Biosynthesis of chondroitin/dermatan sulfate#JOURNAL:IUBMB Life#YEAR:2002#PUBMED:12512856#;Sato T, Gotoh M, Kiyohara K, Akashima T, Iwasaki H, Kameyama A, Mochizuki H, Yada T, Inaba N, Togayachi A, Kudo T, Asada M, Watanabe H, Imamura T, Kimata K, Narimatsu H#TITLE:Differential roles of two N-acetylgalactosaminyltransferases, CSGalNAcT-1, and a novel enzyme, CSGalNAc…
1029	GALSIDEtg	galactocerebroside intracellular transport	Transport, Golgi Apparatus			-1000	1000	1	unknown mechanism for transport - not known if it is energy dependent or not, recycling and IC transport is important to get it to other areas of the cell NJ
1030	GALSIDEtl	galactocerebroside intracellular transport	Transport, Lysosomal			-1000	1000	1	unknown mechanism for transport - not known if it is energy dependent or not, recycling and IC transport is important to get it to other areas of the cell NJ
1031	GALT	galactose-1-phosphate uridylyltransferase	Galactose metabolism	2.7.7.10	( 2592.1 ) or ( 2592.3 ) or ( 2592.2 )	0	0	0	LOCUS:_2592#TRANSCRIPT:1#ABBREVIATION:GALT#ECNUMBERS:2.7.7.12#	Leslie ND, Immerman EB, Flach JE, Florez M, Fridovich-Keil JL, Elsas LJ#TITLE:The human galactose-1-phosphate uridyltransferase gene#JOURNAL:Genomics#YEAR:1992#PUBMED:1427861#
1032	GALT2g	UDP-D-galactose:galactosylxylose galactosyltransferase, Golgi apparatus	Chondroitin / heparan sulfate biosynthesis	2.4.1.134	( 126792.1 )	0	1000	4	NCD	Silbert JE, Sugumaran G#TITLE:Biosynthesis of chondroitin/dermatan sulfate#JOURNAL:IUBMB Life#YEAR:2002#PUBMED:12512856#;Bai X, Zhou D, Brown JR, Crawford BE, Hennet T, Esko JD#TITLE:Biosynthesis of the linkage region of glycosaminoglycans: cloning and activity of galactosyltransferase II, the sixth member of the beta 1,3-galactosyltransferase family (beta 3GalT6)#JOURNAL:J Biol Chem#YEAR:2001#PU…
1033	GALTg	UDP-D-galactose:D-xylose galactosyltransferase, Golgi apparatus	Chondroitin / heparan sulfate biosynthesis	2.4.1.133	( 11285.1 )	0	1000	4	NCD	Okajima T, Yoshida K, Kondo T, Furukawa K#TITLE:Human homolog of Caenorhabditis elegans sqv-3 gene is galactosyltransferase I involved in the biosynthesis of the glycosaminoglycan-protein linkage region of proteoglycans#JOURNAL:J Biol Chem#YEAR:1999#PUBMED:10438455#;Almeida R, Levery SB, Mandel U, Kresse H, Schwientek T, Bennett EP, Clausen H#TITLE:Cloning and expression of a proteoglycan UDP-gal…
1034	GALU	UTP-glucose-1-phosphate uridylyltransferase	Galactose metabolism	2.7.7.9	( 7360.1 ) or ( 7359.1 ) or ( 7360.2 )	-1000	1000	0	LOCUS:_7359#TRANSCRIPT:1#ABBREVIATION:UGP1#ECNUMBERS:2.7.7.9#
1035	GALt1r	galactose transport (uniport)	Transport, Extracellular		( 29988.1 ) or ( 6513.1 ) or ( 6515.1 ) or ( 6514.1 ) or ( 81031.1 )	-1000	1000	4	NCD	Hosokawa M, Thorens B#TITLE:Glucose release from GLUT2-null hepatocytes: characterization of a major and a minor pathway#JOURNAL:Am J Physiol Endocrinol Metab#YEAR:2002#PUBMED:11882499#;Guillam MT, Burcelin R, Thorens B#TITLE:Normal hepatic glucose production in the absence of GLUT2 reveals an alternative pathway for glucose release from hepatocytes#JOURNAL:Proc Natl Acad Sci U S A#YEAR:1998#PUBM…
1036	GALtly	galactose efflux from lysosome	Transport, Lysosomal			0	1000	2	NCD	Pisoni RL, Thoene JG#TITLE:The transport systems of mammalian lysosomes#JOURNAL:Biochim Biophys Acta#YEAR:1991#PUBMED:1751541#;Lloyd JB#TITLE:Metabolite efflux and influx across the lysosome membrane#JOURNAL:Subcell Biochem#YEAR:1996#PUBMED:8993166#
1037	GAMt1r	glucosamine transport (uniport)	Transport, Extracellular		( 6513.1 ) or ( 6517.1 ) or ( 6514.1 )	-1000	1000	4	LOCUS:_6514#TRANSCRIPT:1#ABBREVIATION:SLC2A2#	Hosokawa M, Thorens B#TITLE:Glucose release from GLUT2-null hepatocytes: characterization of a major and a minor pathway#JOURNAL:Am J Physiol Endocrinol Metab#YEAR:2002#PUBMED:11882499#;Guillam MT, Burcelin R, Thorens B#TITLE:Normal hepatic glucose production in the absence of GLUT2 reveals an alternative pathway for glucose release from hepatocytes#JOURNAL:Proc Natl Acad Sci U S A#YEAR:1998#PUBM…
1038	GAO1g	Ganglioside O-acetylation	Sphingolipid Metabolism		( 9197.1 )	0	1000	4	for humans - seq predicted SLC transporters have been found to have O-acetylation activity on gangliosides NJ	Kanamori A, Nakayama J, Fukuda MN, Stallcup WB, Sasaki K, Fukuda M, Hirabayashi Y#TITLE:Expression cloning and characterization of a cDNA encoding a novel membrane protein required for the formation of O-acetylated ganglioside: A putative acetyl-CoA-transporter#JOURNAL:Proc Natl Acad Sci#YEAR:1997#
1039	GAO2g	Ganglioside O-acetylation	Sphingolipid Metabolism		( 9197.1 )	0	1000	4	for humans - seq predicted SLC transporters have been found to have O-acetylation activity on gangliosides NJ	Kanamori A, Nakayama J, Fukuda MN, Stallcup WB, Sasaki K, Fukuda M, Hirabayashi Y#TITLE:Expression cloning and characterization of a cDNA encoding a novel membrane protein required for the formation of O-acetylated ganglioside: A putative acetyl-CoA-transporter#JOURNAL:Proc Natl Acad Sci#YEAR:1997#
1040	GAPD	glyceraldehyde-3-phosphate dehydrogenase	Glycolysis/Gluconeogenesis	1.2.1.12	( 2597.1 ) or ( 26330.1 )	0	171.068	0	SMP
1041	GARFT	phosphoribosylglycinamide formyltransferase	IMP Biosynthesis	2.1.2.2	( 2618.1 ) or ( 2618.2 )	-1000	1000	4	LOCUS:_2618#TRANSCRIPT:1#ABBREVIATION:GART#ECNUMBERS:2.1.2.2,,6.3.1.#	Brodsky G, Barnes T, Bleskan J, Becker L, Cox M, Patterson D.#TITLE:The human GARS-AIRS-GART gene encodes two proteins which are differentially expressed during human brain development and temporally overexpressed in cerebellum of individuals with Down syndrome. #JOURNAL:Hum Mol Genet. #YEAR:1997#PUBMED:9328467#;Zhang Y, Desharnais J, Greasley SE, Beardsley GP, Boger DL, Wilson IA.#TITLE:Crystal …
1042	GASNASE2ly	glycosylasparaginase, lysosomal	N-Glycan Degradation	3.5.1.26	( 175.1 )	0	1000	0	NCD
1043	GASNASE3ly	glycosylasparaginase, lysosomal	Keratan sulfate degradation	3.5.1.26	( 175.1 )	0	1000	4	NCD	Fisher KJ, Tollersrud OK, Aronson NN Jr#TITLE:Cloning and sequence analysis of a cDNA for human glycosylasparaginase. A single gene encodes the subunits of this lysosomal amidase#JOURNAL:FEBS Lett.#YEAR:1990#PUBMED:2401370#;Ikonen E, Baumann M, Gron K, Syvanen AC, Enomaa N, Halila R, Aula P, Peltonen L#TITLE:Aspartylglucosaminuria: cDNA encoding human aspartylglucosaminidase and the missense muta…
1044	GASNASEly	glycosylasparaginase, lysosomal	N-Glycan Degradation	3.5.1.26	( 175.1 )	0	1000	0	NCD
1045	GBA	Glucosylceramidase	Sphingolipid Metabolism	3.2.1.45	( 2629.2 ) or ( 2629.3 ) or ( 2629.4 ) or ( 2629.5 ) or ( 2629.1 )	0	1000	0	NJ	Schmitz M, Alfalah M, Aerts JM, Naim HY, Zimmer KP.#TITLE:Impaired trafficking of mutants of lysosomal glucocerebrosidase in Gaucher&apos;s disease.#JOURNAL:Int J Biochem Cell Biol#YEAR:2005#PUBMED:15982918#
1046	GBAl	Glucosylceramidase	Sphingolipid Metabolism	3.2.1.45	( 2629.4 ) or ( 2629.1 ) or ( 2629.3 ) or ( 2629.2 ) or ( 2629.5 )	0	1000	4	NJ	Orvisky E, Park JK, Parker A, Walker JM, Martin BM, Stubblefield BK, Uyama E, Tayebi N, Sidransky E.#TITLE:The identification of eight novel glucocerebrosidase (GBA) mutations in patients with Gaucher disease.#JOURNAL:Hum Mutat#YEAR:2002#PUBMED:11933202#;Tettamanti G, Bassi R, Viani P, Riboni L#TITLE:Salvage pathways in glycosphingolipid metabolism#JOURNAL:Biochimie#YEAR:2003#;Berrin JG, Czjzek M…
1047	GBGT1	globoside alpha-1,3-N-acetylgalactosaminyltransferase 1	Sphingolipid Metabolism		( 26301.1 )	0	1000	4	NJ	Kolter T, Sandhoff K#TITLE:Recent advances in the biochemistry of sphingolipidoses#JOURNAL:Brain Pathology#YEAR:1998#;Xu H, Storch T, Yu M, Elliott SP, Haslam DB.#TITLE:haracterization of the human Forssman synthetase gene. An evolving association between glycolipid synthesis and host-microbial interactions. #JOURNAL:J Biol Chem#YEAR:1999#PUBMED:10506200#
1048	GBSIDEte	globoside transport	Transport, Extracellular			-1000	1000	1	unknown mechanism for transport - not known if it is energy dependent or not, recycling and IC transport is important to get it to other areas of the cell (e.g. plasma membrane) - The goal of this transporter is to get globoside to the EC plasma membrane NJ
1049	GBSIDEtl	globoside intracellular transport	Transport, Lysosomal			-1000	1000	1	unknown mechanism for transport - not known if it is energy dependent or not, recycling and IC transport is important to get it to other areas of the cell (e.g. plasma membrane) NJ
1050	GCALDD	Glycolaldehyde dehydrogenase	Glyoxylate and Dicarboxylate Metabolism	1.2.1.21	( 218.1 ) or ( 223.1 ) or ( 8854.2 ) or ( 224.1 ) or ( 222.1 ) or ( 8854.1 ) or ( 221.1 ) or ( 216.1 ) or ( 8854.3 ) or ( 501.1 ) or ( 220.1 )	0	1000	2	JLR	Brent J#TITLE:Current management of ethylene glycol poisoning#JOURNAL:Drugs#YEAR:2001#PUBMED:11434452#
1051	GCC2am	glycine-cleavage complex (lipoamide), mitochondrial	Glycine, Serine, and Threonine Metabolism	1.4.4.2	( 275.1 ) and ( 1738.1 ) and ( 2731.1 ) and ( 2653.1 )	-1000	1000	4	NCD	Lee HH, Kim do J, Ahn HJ, Ha JY, Suh SW.#TITLE:Crystal structure of T-protein of the glycine cleavage system. Cofactor binding, insights into H-protein recognition, and molecular basis for understanding nonketotic hyperglycinemia.#YEAR:2004#PUBMED:15355973#
1052	GCC2bim	glycine-cleavage system (lipoamide) irreversible, mitochondrial	Glycine, Serine, and Threonine Metabolism	2.1.2.10	( 275.1 ) and ( 1738.1 ) and ( 2731.1 ) and ( 2653.1 )	0	1000	4	NCD	Lee HH, Kim do J, Ahn HJ, Ha JY, Suh SW.#TITLE:Crystal structure of T-protein of the glycine cleavage system. Cofactor binding, insights into H-protein recognition, and molecular basis for understanding nonketotic hyperglycinemia.#YEAR:2004#PUBMED:15355973#
1053	GCC2cm	glycine-cleavage complex (lipoamide), mitochondrial	Glycine, Serine, and Threonine Metabolism	1.8.1.4	( 275.1 ) and ( 1738.1 ) and ( 2731.1 ) and ( 2653.1 )	-1000	1000	4	NCD	Lee HH, Kim do J, Ahn HJ, Ha JY, Suh SW.#TITLE:Crystal structure of T-protein of the glycine cleavage system. Cofactor binding, insights into H-protein recognition, and molecular basis for understanding nonketotic hyperglycinemia.#YEAR:2004#PUBMED:15355973#
1054	GCCam	glycine-cleavage complex (lipoylprotein), mitochondrial	Glycine, Serine, and Threonine Metabolism	1.4.4.2	( 275.1 ) and ( 1738.1 ) and ( 2731.1 ) and ( 2653.1 )	-1000	1000	4	NCD	Lee HH, Kim do J, Ahn HJ, Ha JY, Suh SW.#TITLE:Crystal structure of T-protein of the glycine cleavage system. Cofactor binding, insights into H-protein recognition, and molecular basis for understanding nonketotic hyperglycinemia.#YEAR:2004#PUBMED:15355973#
1055	GCCbim	glycine-cleavage complex (lipoylprotein) irreversible, mitochondrial	Glycine, Serine, and Threonine Metabolism	2.1.2.10	( 275.1 ) and ( 1738.1 ) and ( 2731.1 ) and ( 2653.1 )	0	1000	4	NCD	Lee HH, Kim do J, Ahn HJ, Ha JY, Suh SW.#TITLE:Crystal structure of T-protein of the glycine cleavage system. Cofactor binding, insights into H-protein recognition, and molecular basis for understanding nonketotic hyperglycinemia.#YEAR:2004#PUBMED:15355973#
1056	GCCcm	glycine-cleavage complex (lipoylprotein), mitochondrial	Glycine, Serine, and Threonine Metabolism	1.8.1.4	( 275.1 ) and ( 1738.1 ) and ( 2731.1 ) and ( 2653.1 )	-1000	1000	4	NCD	Lee HH, Kim do J, Ahn HJ, Ha JY, Suh SW.#TITLE:Crystal structure of T-protein of the glycine cleavage system. Cofactor binding, insights into H-protein recognition, and molecular basis for understanding nonketotic hyperglycinemia.#YEAR:2004#PUBMED:15355973#
1057	GCHOLAt	glycocholate transport via bicarbonate countertransport	Transport, Extracellular		( 6579.1 ) or ( 28234.1 ) or ( 10599.1 )	-1000	1000	4	NJ	Kullak-Ublick GA, Beuers U, Meier PJ, Domdey H, Paumgartner G.#TITLE:Assignment of the human organic anion transporting polypeptide (OATP) gene to chromosome 12p12 by fluorescence in situ hybridization.#JOURNAL:J Hepatol.#YEAR:1996#PUBMED:9007731#;Hagenbuch B, Meier PJ.#TITLE:The superfamily of organic anion transporting polypeptides.#JOURNAL:Biochim Biophys Acta.#YEAR:2003#PUBMED:12507753#;Satli…
1058	GCHOLAt3	ABC bile acid transporter	Transport, Extracellular		( 8714.3 ) or ( 8647.1 ) or ( 8714.2 ) or ( 8714.1 )	0	1000	4	for bile acid secretion into bile NJ	Strautnieks SS, Bull LN, Knisely AS, Kocoshis SA, Dahl N, Arnell H, Sokal E, Dahan K, Childs S, Ling V, Tanner MS, Kagalwalla AF, Nemeth A, Pawlowska J, Baker A, Mieli-Vergani G, Freimer NB, Gardiner RM, Thompson RJ.#TITLE:A gene encoding a liver-specific ABC transporter is mutated in progressive familial intrahepatic cholestasis.#JOURNAL:Nat Genet.#YEAR:1998#PUBMED:9806540#;Kiuchi Y, Suzuki H, H…
1059	GD1B2te	gd1b2 hs transport	Transport, Extracellular			-1000	1000	1	unknown mechanism for transport - intracellular transport occurs, most details are unknown - see for example Varki glycobiology text or numerous reviews (PMID: 8206147) - extracellular transport is also made available since metabolites can get to outer plasma membrane NJ	Varki, Cummings, Esko, Freeze, Hart, Marth#TITLE:Essentials of Glycobiology#YEAR:1999#
1060	GD1B2tg	gd1b2 hs intracellular transport	Transport, Golgi Apparatus			-1000	1000	1	unknown mechanism for transport - intracellular transport occurs, most details are unknown - see for example Varki glycobiology text or numerous reviews (PMID: 8206147) NJ	Varki, Cummings, Esko, Freeze, Hart, Marth#TITLE:Essentials of Glycobiology#YEAR:1999#;Sandhoff K, Klein A.#TITLE:Intracellular trafficking of glycosphingolipids: role of sphingolipid activator proteins in the topology of endocytosis and lysosomal digestion.#JOURNAL:FEBS Lett.#YEAR:1994#PUBMED:8206147#
1061	GD1Cte	gd1c hs transport	Transport, Extracellular			-1000	1000	1	unknown mechanism for transport - intracellular transport occurs, most details are unknown - see for example Varki glycobiology text or numerous reviews (PMID: 8206147) - extracellular transport is also made available since metabolites can get to outer plasma membrane NJ	Varki, Cummings, Esko, Freeze, Hart, Marth#TITLE:Essentials of Glycobiology#YEAR:1999#
1062	GD1Ctg	gd1c hs intracellular transport	Transport, Golgi Apparatus			-1000	1000	1	unknown mechanism for transport - intracellular transport occurs, most details are unknown - see for example Varki glycobiology text or numerous reviews (PMID: 8206147) NJ	Varki, Cummings, Esko, Freeze, Hart, Marth#TITLE:Essentials of Glycobiology#YEAR:1999#;Sandhoff K, Klein A.#TITLE:Intracellular trafficking of glycosphingolipids: role of sphingolipid activator proteins in the topology of endocytosis and lysosomal digestion.#JOURNAL:FEBS Lett.#YEAR:1994#PUBMED:8206147#
1063	GF6PTA	glutamine-fructose-6-phosphate transaminase	Aminosugar Metabolism	2.6.1.16	( 2673.1 ) or ( 9945.1 )	0	1000	4	LOCUS:_9945#TRANSCRIPT:1#ABBREVIATION:GFPT2#	Varki, Cummings, Esko, Freeze, Hart, Marth#TITLE:Essentials of Glycobiology#YEAR:1999#;Devlin, TM#TITLE:Textbook of Biochemistry with Clinical Correlations#YEAR:2001#;Orten JM, Neuhaus OW.#TITLE:Human Biochemistry#YEAR:1975#;McKnight GL, Mudri SL, Mathewes SL, Traxinger RR, Marshall S, Sheppard PO, O&apos;Hara PJ. #TITLE:Molecular cloning, cDNA sequence, and bacterial expression of human glutamin…
1064	GGH_10FTHF5GLUe	Gamma-glutamyl hydrolase (10FTHF5GLU), extracellular	Folate Metabolism		( 8836.1 )	0	1000	4	REMOVES EITHER ONE OR TWO GLUTAMYL RESIDUES WITH A REACTION (WILL ONLY REPRESENT 1) - last step from 5-glutamyl to monoglutamyl is in one step IT	Suh JR, Herbig AK, Stover PJ. #TITLE:New perspectives on folate catabolism. #JOURNAL:Annu Rev Nutr.#YEAR:2001#PUBMED:11375437#;Rhee MS, Lindau-Shepard B, Chave KJ, Galivan J, Ryan TJ.#TITLE:Characterization of human cellular gamma-glutamyl hydrolase.#JOURNAL:Mol Pharmacol. #YEAR:1998#PUBMED:9614206#;Chandler CJ, Wang TT, Halsted CH.#TITLE:Pteroylpolyglutamate hydrolase from human jejunal brush bo…
1065	GGH_10FTHF5GLUl	Gamma-glutamyl hydrolase (10FTHF5GLU), lysosomal	Folate Metabolism		( 8836.1 )	0	1000	4	REMOVES EITHER ONE OR TWO GLUTAMYL RESIDUES WITH A REACTION (WILL ONLY REPRESENT 1) - last step from 5-glutamyl to monoglutamyl is in one step IT	Suh JR, Herbig AK, Stover PJ. #TITLE:New perspectives on folate catabolism. #JOURNAL:Annu Rev Nutr.#YEAR:2001#PUBMED:11375437#;Rhee MS, Lindau-Shepard B, Chave KJ, Galivan J, Ryan TJ.#TITLE:Characterization of human cellular gamma-glutamyl hydrolase.#JOURNAL:Mol Pharmacol. #YEAR:1998#PUBMED:9614206#;Chandler CJ, Wang TT, Halsted CH.#TITLE:Pteroylpolyglutamate hydrolase from human jejunal brush bo…
1066	GGH_10FTHF6GLUe	Gamma-glutamyl hydrolase (10FTHF6GLU), extracellular	Folate Metabolism		( 8836.1 )	0	1000	4	REMOVES EITHER ONE OR TWO GLUTAMYL RESIDUES WITH A REACTION (WILL ONLY REPRESENT 1) IT	Suh JR, Herbig AK, Stover PJ. #TITLE:New perspectives on folate catabolism. #JOURNAL:Annu Rev Nutr.#YEAR:2001#PUBMED:11375437#;Rhee MS, Lindau-Shepard B, Chave KJ, Galivan J, Ryan TJ.#TITLE:Characterization of human cellular gamma-glutamyl hydrolase.#JOURNAL:Mol Pharmacol. #YEAR:1998#PUBMED:9614206#;Chandler CJ, Wang TT, Halsted CH.#TITLE:Pteroylpolyglutamate hydrolase from human jejunal brush bo…
1067	GGH_10FTHF6GLUl	Gamma-glutamyl hydrolase (10FTHF6GLU), lysosomal	Folate Metabolism		( 8836.1 )	0	1000	4	REMOVES EITHER ONE OR TWO GLUTAMYL RESIDUES WITH A REACTION (WILL ONLY REPRESENT 1) IT	Suh JR, Herbig AK, Stover PJ. #TITLE:New perspectives on folate catabolism. #JOURNAL:Annu Rev Nutr.#YEAR:2001#PUBMED:11375437#;Rhee MS, Lindau-Shepard B, Chave KJ, Galivan J, Ryan TJ.#TITLE:Characterization of human cellular gamma-glutamyl hydrolase.#JOURNAL:Mol Pharmacol. #YEAR:1998#PUBMED:9614206#;Chandler CJ, Wang TT, Halsted CH.#TITLE:Pteroylpolyglutamate hydrolase from human jejunal brush bo…
1068	GGH_10FTHF7GLUl	Gamma-glutamyl hydrolase (10FTHF7GLU), lysosomal	Folate Metabolism		( 8836.1 )	0	1000	4	REMOVES EITHER ONE OR TWO GLUTAMYL RESIDUES WITH A REACTION (WILL ONLY REPRESENT 1) IT	Suh JR, Herbig AK, Stover PJ. #TITLE:New perspectives on folate catabolism. #JOURNAL:Annu Rev Nutr.#YEAR:2001#PUBMED:11375437#;Rhee MS, Lindau-Shepard B, Chave KJ, Galivan J, Ryan TJ.#TITLE:Characterization of human cellular gamma-glutamyl hydrolase.#JOURNAL:Mol Pharmacol. #YEAR:1998#PUBMED:9614206#;Chandler CJ, Wang TT, Halsted CH.#TITLE:Pteroylpolyglutamate hydrolase from human jejunal brush bo…
1069	GGH_5DHFe	Gamma-glutamyl hydrolase (5DHF), extracellular	Folate Metabolism		( 8836.1 )	0	1000	4	REMOVES EITHER ONE OR TWO GLUTAMYL RESIDUES WITH A REACTION (WILL ONLY REPRESENT 1) - last step from 5-glutamyl to monoglutamyl is in one step IT	Suh JR, Herbig AK, Stover PJ. #TITLE:New perspectives on folate catabolism. #JOURNAL:Annu Rev Nutr.#YEAR:2001#PUBMED:11375437#;Rhee MS, Lindau-Shepard B, Chave KJ, Galivan J, Ryan TJ.#TITLE:Characterization of human cellular gamma-glutamyl hydrolase.#JOURNAL:Mol Pharmacol. #YEAR:1998#PUBMED:9614206#;Chandler CJ, Wang TT, Halsted CH.#TITLE:Pteroylpolyglutamate hydrolase from human jejunal brush bo…
1070	GGH_5DHFl	Gamma-glutamyl hydrolase (5DHF), lysosomal	Folate Metabolism		( 8836.1 )	0	1000	4	REMOVES EITHER ONE OR TWO GLUTAMYL RESIDUES WITH A REACTION (WILL ONLY REPRESENT 1) - last step from 5-glutamyl to monoglutamyl is in one step IT	Suh JR, Herbig AK, Stover PJ. #TITLE:New perspectives on folate catabolism. #JOURNAL:Annu Rev Nutr.#YEAR:2001#PUBMED:11375437#;Rhee MS, Lindau-Shepard B, Chave KJ, Galivan J, Ryan TJ.#TITLE:Characterization of human cellular gamma-glutamyl hydrolase.#JOURNAL:Mol Pharmacol. #YEAR:1998#PUBMED:9614206#;Chandler CJ, Wang TT, Halsted CH.#TITLE:Pteroylpolyglutamate hydrolase from human jejunal brush bo…
1071	GGH_5THFe	Gamma-glutamyl hydrolase (5THF), extracellular	Folate Metabolism		( 8836.1 )	0	1000	4	REMOVES EITHER ONE OR TWO GLUTAMYL RESIDUES WITH A REACTION (WILL ONLY REPRESENT 1) - last step from 5-glutamyl to monoglutamyl is in one step IT	Suh JR, Herbig AK, Stover PJ. #TITLE:New perspectives on folate catabolism. #JOURNAL:Annu Rev Nutr.#YEAR:2001#PUBMED:11375437#;Rhee MS, Lindau-Shepard B, Chave KJ, Galivan J, Ryan TJ.#TITLE:Characterization of human cellular gamma-glutamyl hydrolase.#JOURNAL:Mol Pharmacol. #YEAR:1998#PUBMED:9614206#;Chandler CJ, Wang TT, Halsted CH.#TITLE:Pteroylpolyglutamate hydrolase from human jejunal brush bo…
1072	GGH_5THFl	Gamma-glutamyl hydrolase (5THF), lysosomal	Folate Metabolism		( 8836.1 )	0	1000	4	REMOVES EITHER ONE OR TWO GLUTAMYL RESIDUES WITH A REACTION (WILL ONLY REPRESENT 1) - last step from 5-glutamyl to monoglutamyl is in one step IT	Suh JR, Herbig AK, Stover PJ. #TITLE:New perspectives on folate catabolism. #JOURNAL:Annu Rev Nutr.#YEAR:2001#PUBMED:11375437#;Rhee MS, Lindau-Shepard B, Chave KJ, Galivan J, Ryan TJ.#TITLE:Characterization of human cellular gamma-glutamyl hydrolase.#JOURNAL:Mol Pharmacol. #YEAR:1998#PUBMED:9614206#;Chandler CJ, Wang TT, Halsted CH.#TITLE:Pteroylpolyglutamate hydrolase from human jejunal brush bo…
1073	GGH_6DHFe	Gamma-glutamyl hydrolase (6DHF), extracellular	Folate Metabolism		( 8836.1 )	0	1000	4	REMOVES EITHER ONE OR TWO GLUTAMYL RESIDUES WITH A REACTION (WILL ONLY REPRESENT 1) IT	Suh JR, Herbig AK, Stover PJ. #TITLE:New perspectives on folate catabolism. #JOURNAL:Annu Rev Nutr.#YEAR:2001#PUBMED:11375437#;Rhee MS, Lindau-Shepard B, Chave KJ, Galivan J, Ryan TJ.#TITLE:Characterization of human cellular gamma-glutamyl hydrolase.#JOURNAL:Mol Pharmacol. #YEAR:1998#PUBMED:9614206#;Chandler CJ, Wang TT, Halsted CH.#TITLE:Pteroylpolyglutamate hydrolase from human jejunal brush bo…
1074	GGH_6DHFl	Gamma-glutamyl hydrolase (6DHF), lysosomal	Folate Metabolism		( 8836.1 )	0	1000	4	REMOVES EITHER ONE OR TWO GLUTAMYL RESIDUES WITH A REACTION (WILL ONLY REPRESENT 1) IT	Suh JR, Herbig AK, Stover PJ. #TITLE:New perspectives on folate catabolism. #JOURNAL:Annu Rev Nutr.#YEAR:2001#PUBMED:11375437#;Rhee MS, Lindau-Shepard B, Chave KJ, Galivan J, Ryan TJ.#TITLE:Characterization of human cellular gamma-glutamyl hydrolase.#JOURNAL:Mol Pharmacol. #YEAR:1998#PUBMED:9614206#;Chandler CJ, Wang TT, Halsted CH.#TITLE:Pteroylpolyglutamate hydrolase from human jejunal brush bo…
1075	GGH_6THFe	Gamma-glutamyl hydrolase (6THF), extracellular	Folate Metabolism		( 8836.1 )	0	1000	4	REMOVES EITHER ONE OR TWO GLUTAMYL RESIDUES WITH A REACTION (WILL ONLY REPRESENT 1) IT	Suh JR, Herbig AK, Stover PJ. #TITLE:New perspectives on folate catabolism. #JOURNAL:Annu Rev Nutr.#YEAR:2001#PUBMED:11375437#;Rhee MS, Lindau-Shepard B, Chave KJ, Galivan J, Ryan TJ.#TITLE:Characterization of human cellular gamma-glutamyl hydrolase.#JOURNAL:Mol Pharmacol. #YEAR:1998#PUBMED:9614206#;Chandler CJ, Wang TT, Halsted CH.#TITLE:Pteroylpolyglutamate hydrolase from human jejunal brush bo…
1076	GGH_6THFl	Gamma-glutamyl hydrolase (6THF), lysosomal	Folate Metabolism		( 8836.1 )	0	1000	4	REMOVES EITHER ONE OR TWO GLUTAMYL RESIDUES WITH A REACTION (WILL ONLY REPRESENT 1) IT	Suh JR, Herbig AK, Stover PJ. #TITLE:New perspectives on folate catabolism. #JOURNAL:Annu Rev Nutr.#YEAR:2001#PUBMED:11375437#;Rhee MS, Lindau-Shepard B, Chave KJ, Galivan J, Ryan TJ.#TITLE:Characterization of human cellular gamma-glutamyl hydrolase.#JOURNAL:Mol Pharmacol. #YEAR:1998#PUBMED:9614206#;Chandler CJ, Wang TT, Halsted CH.#TITLE:Pteroylpolyglutamate hydrolase from human jejunal brush bo…
1077	GGH_7DHFe	Gamma-glutamyl hydrolase (7DHF), extracellular	Folate Metabolism		( 8836.1 )	0	1000	4	REMOVES EITHER ONE OR TWO GLUTAMYL RESIDUES WITH A REACTION (WILL ONLY REPRESENT 1) IT	Suh JR, Herbig AK, Stover PJ. #TITLE:New perspectives on folate catabolism. #JOURNAL:Annu Rev Nutr.#YEAR:2001#PUBMED:11375437#;Rhee MS, Lindau-Shepard B, Chave KJ, Galivan J, Ryan TJ.#TITLE:Characterization of human cellular gamma-glutamyl hydrolase.#JOURNAL:Mol Pharmacol. #YEAR:1998#PUBMED:9614206#;Chandler CJ, Wang TT, Halsted CH.#TITLE:Pteroylpolyglutamate hydrolase from human jejunal brush bo…
1078	GGH_7DHFl	Gamma-glutamyl hydrolase (7DHF), lysosomal	Folate Metabolism		( 8836.1 )	0	1000	4	REMOVES EITHER ONE OR TWO GLUTAMYL RESIDUES WITH A REACTION (WILL ONLY REPRESENT 1) IT	Suh JR, Herbig AK, Stover PJ. #TITLE:New perspectives on folate catabolism. #JOURNAL:Annu Rev Nutr.#YEAR:2001#PUBMED:11375437#;Rhee MS, Lindau-Shepard B, Chave KJ, Galivan J, Ryan TJ.#TITLE:Characterization of human cellular gamma-glutamyl hydrolase.#JOURNAL:Mol Pharmacol. #YEAR:1998#PUBMED:9614206#;Chandler CJ, Wang TT, Halsted CH.#TITLE:Pteroylpolyglutamate hydrolase from human jejunal brush bo…
1079	GGH_7THFe	Gamma-glutamyl hydrolase (7THF), extracellular	Folate Metabolism		( 8836.1 )	0	1000	4	REMOVES EITHER ONE OR TWO GLUTAMYL RESIDUES WITH A REACTION (WILL ONLY REPRESENT 1) IT	Suh JR, Herbig AK, Stover PJ. #TITLE:New perspectives on folate catabolism. #JOURNAL:Annu Rev Nutr.#YEAR:2001#PUBMED:11375437#;Rhee MS, Lindau-Shepard B, Chave KJ, Galivan J, Ryan TJ.#TITLE:Characterization of human cellular gamma-glutamyl hydrolase.#JOURNAL:Mol Pharmacol. #YEAR:1998#PUBMED:9614206#;Chandler CJ, Wang TT, Halsted CH.#TITLE:Pteroylpolyglutamate hydrolase from human jejunal brush bo…
1080	GGH_7THFl	Gamma-glutamyl hydrolase (7THF), lysosomal	Folate Metabolism		( 8836.1 )	0	1000	4	REMOVES EITHER ONE OR TWO GLUTAMYL RESIDUES WITH A REACTION (WILL ONLY REPRESENT 1) IT	Suh JR, Herbig AK, Stover PJ. #TITLE:New perspectives on folate catabolism. #JOURNAL:Annu Rev Nutr.#YEAR:2001#PUBMED:11375437#;Rhee MS, Lindau-Shepard B, Chave KJ, Galivan J, Ryan TJ.#TITLE:Characterization of human cellular gamma-glutamyl hydrolase.#JOURNAL:Mol Pharmacol. #YEAR:1998#PUBMED:9614206#;Chandler CJ, Wang TT, Halsted CH.#TITLE:Pteroylpolyglutamate hydrolase from human jejunal brush bo…
1081	GGLUCT	gamma-glutamylcyclotransferase	Glutathione Metabolism	2.3.2.4	( 79017.1 )	0	1000	4	SAB	York MJ, Crossley MJ, Hyslop SJ, Fisher ML, Kuchel PW#TITLE:gamma-Glutamylcyclotransferase: inhibition by D-beta-aminoglutaryl-L-alanine and analysis of the solvent kinetic isotope effect#JOURNAL:Eur J Biochem#YEAR:1989#PUBMED:2570694#
1082	GGNG	glycogenin self-glucosylation	Starch and Sucrose Metabolism		( 8908.1 ) and ( 2998.1 ) or ( 2998.1 ) and ( 2992.1 ) or ( 2997.1 ) and ( 2992.1 ) or ( 8908.1 ) and ( 2997.1 )	0	1000	4	NCD	Devlin, TM#TITLE:Textbook of Biochemistry with Clinical Correlations#YEAR:2001#;Barbetti F, Rocchi M, Bossolasco M, Cordera R, Sbraccia P, Finelli P, Consalez GG.#TITLE:The human skeletal muscle glycogenin gene: cDNA, tissue expression and chromosomal localization#JOURNAL:Biochem Biophys Res Commun#YEAR:1996#PUBMED:8602861#;Mu J, Skurat AV, Roach PJ#TITLE:Glycogenin-2, a novel self-glucosylating …
1083	GGT5r	Gamma-glutamyltransferase 5	Eicosanoid Metabolism	2.3.2.2	( 2687.1 )	-1000	1000	4	Cleaves the gamma-glutamyl peptide bond of glutathione conjugates, but maybe not glutathione itself. Converts leukotriene C4 (LTC4) to leukotriene D4 (LTD4). NJ
1084	GK1	guanylate kinase (GMP:ATP)	Nucleotides	2.7.4.8	( 2987.1 )	-1000	1000	4	LOCUS:_2987#TRANSCRIPT:1#ABBREVIATION:GUK1#ECNUMBERS:2.7.4.8#	Brady WA, Kokoris MS, Fitzgibbon M, Black ME. #TITLE:Cloning, characterization, and modeling of mouse and human guanylate kinases.#JOURNAL:J Biol Chem#YEAR:1996#PUBMED:8663313#
1085	GLAl	galactosidase, alpha	Sphingolipid Metabolism	3.2.1.22	( 2717.1 )	0	1000	4	NJ	Ishii S, Nakao S, Minamikawa-Tachino R, Desnick RJ, Fan JQ.#TITLE:Alternative splicing in the alpha-galactosidase A gene: increased exon inclusion results in the Fabry cardiac phenotype.#JOURNAL:Am J Hum Genet#YEAR:2002#PUBMED:11828341#;Lam CW, Mak YT, Lo YM, Tong SF, To KF, Lai FM.#TITLE:Molecular genetic analysis of a Chinese patient with Fabry disease.#JOURNAL:Chin Med J (Engl)#YEAR:2000#PUBME…
1086	GLB1	Beta-galactosidase	Sphingolipid Metabolism	3.2.1.23	( 5476.1 ) and ( 2720.1 ) and ( 2588.1 ) and ( 4758.1 ) or ( 5476.1 ) and ( 2720.1 )	0	1000	4	NJ	Oshima A, Tsuji A, Nagao Y, Sakuraba H, Suzuki Y.#TITLE:Cloning, sequencing, and expression of cDNA for human beta-galactosidase.#JOURNAL:Biochem Biophys Res Commun#YEAR:1988#PUBMED:3143362#;Lim CT, Horwitz AL#TITLE:Purification and properties of human N-acetylgalactosamine-6-sulfate sulfatase#JOURNAL:Biochim Biophys Acta#YEAR:1981#PUBMED:7213753#;Glossl J, Truppe W, Kresse H#TITLE:Purification a…
1087	GLBRAN	1,4-alpha-glucan branching enzyme (glygn1 -> glygn2)	Starch and Sucrose Metabolism	2.4.1.18	( 2632.1 )	0	1000	4	NCD	Devlin, TM#TITLE:Textbook of Biochemistry with Clinical Correlations#YEAR:2001#;Thon VJ, Khalil M, Cannon JF#TITLE:Isolation of human glycogen branching enzyme cDNAs by screening complementation in yeast.#JOURNAL:J Biol Chem#YEAR:1993#PUBMED:8463281#
1088	GLCAASE1ly	beta-glucuronidase, lysosomal	Heparan sulfate degradation	3.2.1.31	( 2990.1 )	0	1000	4	NCD	Guise KS, Korneluk RG, Waye J, Lamhonwah AM, Quan F, Palmer R, Ganschow RE, Sly WS, Gravel RA#TITLE:Isolation and expression in Escherichia coli of a cDNA clone encoding human beta-glucuronidase#JOURNAL:Gene#YEAR:1985#PUBMED:3924735#;Ho YC, Ho LH, Ho KJ#TITLE:Human hepatic beta-glucuronidase: an enzyme kinetic study#JOURNAL:Enzyme#YEAR:1985#PUBMED:3987656#;Oshima A, Kyle JW, Miller RD, Hoffmann J…
1089	GLCAASE4ly	beta-glucuronidase, lysosomal	Chondroitin sulfate degradation	3.2.1.31	( 2990.1 )	0	1000	4	NCD	Guise KS, Korneluk RG, Waye J, Lamhonwah AM, Quan F, Palmer R, Ganschow RE, Sly WS, Gravel RA#TITLE:Isolation and expression in Escherichia coli of a cDNA clone encoding human beta-glucuronidase#JOURNAL:Gene#YEAR:1985#PUBMED:3924735#;Ho YC, Ho LH, Ho KJ#TITLE:Human hepatic beta-glucuronidase: an enzyme kinetic study#JOURNAL:Enzyme#YEAR:1985#PUBMED:3987656#;Oshima A, Kyle JW, Miller RD, Hoffmann J…
1090	GLCAASE5ly	beta-glucuronidase, lysosomal	Chondroitin sulfate degradation	3.2.1.31	( 2990.1 )	0	1000	4	NCD	Guise KS, Korneluk RG, Waye J, Lamhonwah AM, Quan F, Palmer R, Ganschow RE, Sly WS, Gravel RA#TITLE:Isolation and expression in Escherichia coli of a cDNA clone encoding human beta-glucuronidase#JOURNAL:Gene#YEAR:1985#PUBMED:3924735#;Ho YC, Ho LH, Ho KJ#TITLE:Human hepatic beta-glucuronidase: an enzyme kinetic study#JOURNAL:Enzyme#YEAR:1985#PUBMED:3987656#;Oshima A, Kyle JW, Miller RD, Hoffmann J…
1091	GLCAASE6ly	beta-glucuronidase, lysosomal	Chondroitin sulfate degradation	3.2.1.31	( 2990.1 )	0	1000	4	NCD	Guise KS, Korneluk RG, Waye J, Lamhonwah AM, Quan F, Palmer R, Ganschow RE, Sly WS, Gravel RA#TITLE:Isolation and expression in Escherichia coli of a cDNA clone encoding human beta-glucuronidase#JOURNAL:Gene#YEAR:1985#PUBMED:3924735#;Ho YC, Ho LH, Ho KJ#TITLE:Human hepatic beta-glucuronidase: an enzyme kinetic study#JOURNAL:Enzyme#YEAR:1985#PUBMED:3987656#;Oshima A, Kyle JW, Miller RD, Hoffmann J…
1092	GLCAASE7ly	beta-glucuronidase, lysosomal	Chondroitin sulfate degradation	3.2.1.31	( 2990.1 )	0	1000	4	NCD	Guise KS, Korneluk RG, Waye J, Lamhonwah AM, Quan F, Palmer R, Ganschow RE, Sly WS, Gravel RA#TITLE:Isolation and expression in Escherichia coli of a cDNA clone encoding human beta-glucuronidase#JOURNAL:Gene#YEAR:1985#PUBMED:3924735#;Ho YC, Ho LH, Ho KJ#TITLE:Human hepatic beta-glucuronidase: an enzyme kinetic study#JOURNAL:Enzyme#YEAR:1985#PUBMED:3987656#;Oshima A, Kyle JW, Miller RD, Hoffmann J…
1093	GLCAASE8ly	beta-glucuronidase, lysosomal	Hyaluronan Metabolism	3.2.1.31	( 2990.1 )	0	1000	4	NCD	Varki, Cummings, Esko, Freeze, Hart, Marth#TITLE:Essentials of Glycobiology#YEAR:1999#;Guise KS, Korneluk RG, Waye J, Lamhonwah AM, Quan F, Palmer R, Ganschow RE, Sly WS, Gravel RA#TITLE:Isolation and expression in Escherichia coli of a cDNA clone encoding human beta-glucuronidase#JOURNAL:Gene#YEAR:1985#PUBMED:3924735#;Ho YC, Ho LH, Ho KJ#TITLE:Human hepatic beta-glucuronidase: an enzyme kinetic …
1094	GLCAASE9ly	beta-glucuronidase, lysosomal	Hyaluronan Metabolism	3.2.1.31	( 2990.1 )	0	1000	4	NCD	Guise KS, Korneluk RG, Waye J, Lamhonwah AM, Quan F, Palmer R, Ganschow RE, Sly WS, Gravel RA#TITLE:Isolation and expression in Escherichia coli of a cDNA clone encoding human beta-glucuronidase#JOURNAL:Gene#YEAR:1985#PUBMED:3924735#;Ho YC, Ho LH, Ho KJ#TITLE:Human hepatic beta-glucuronidase: an enzyme kinetic study#JOURNAL:Enzyme#YEAR:1985#PUBMED:3987656#;Oshima A, Kyle JW, Miller RD, Hoffmann J…
1095	GLCAE1g	chondroitin-glucuronate 5-epimerase	Chondroitin / heparan sulfate biosynthesis	5.1.3.19		0	1000	2	NCD	Silbert JE, Sugumaran G#TITLE:Biosynthesis of chondroitin/dermatan sulfate#JOURNAL:IUBMB Life#YEAR:2002#PUBMED:12512856#
1096	GLCAE2g	heparosan-N-sulfate-glucuronate 5-epimerase	Chondroitin / heparan sulfate biosynthesis	5.1.3.17	( 26035.1 )	0	1000	4	NCD	Sugahara K, Kitagawa H#TITLE:Heparin and heparan sulfate biosynthesis#JOURNAL:IUBMB Life#YEAR:2002#PUBMED:12512855#;Li JP, Gong F, El Darwish K, Jalkanen M, Lindahl U#TITLE:Characterization of the D-glucuronyl C5-epimerase involved in the biosynthesis of heparin and heparan sulfate#JOURNAL:J Biol Chem#YEAR:2001#PUBMED:11274177#;Crawford BE, Olson SK, Esko JD, Pinhal MA#TITLE:Cloning, Golgi locali…
1097	GLCAT2g	chondroitin glucuronyltransferase II, Golgi apparatus	Chondroitin / heparan sulfate biosynthesis		( 54480.1 ) or ( 337876.1 ) or ( 79586.1 ) and ( 22856.1 )	0	1000	4	EC 2.4.1.226 NCD	Silbert JE, Sugumaran G#TITLE:Biosynthesis of chondroitin/dermatan sulfate#JOURNAL:IUBMB Life#YEAR:2002#PUBMED:12512856#;Gotoh M, Yada T, Sato T, Akashima T, Iwasaki H, Mochizuki H, Inaba N, Togayachi A, Kudo T, Watanabe H, Kimata K, Narimatsu H#TITLE:Molecular cloning and characterization of a novel chondroitin sulfate glucuronyltransferase that transfers glucuronic acid to N-acetylgalactosamine…
1098	GLCAT3g	chondroitin glucuronyltransferase II, Golgi apparatus	Chondroitin / heparan sulfate biosynthesis		( 54480.1 ) or ( 337876.1 ) or ( 79586.1 ) and ( 22856.1 )	0	1000	4	EC 2.4.1.226 NCD	Silbert JE, Sugumaran G#TITLE:Biosynthesis of chondroitin/dermatan sulfate#JOURNAL:IUBMB Life#YEAR:2002#PUBMED:12512856#;Gotoh M, Yada T, Sato T, Akashima T, Iwasaki H, Mochizuki H, Inaba N, Togayachi A, Kudo T, Watanabe H, Kimata K, Narimatsu H#TITLE:Molecular cloning and characterization of a novel chondroitin sulfate glucuronyltransferase that transfers glucuronic acid to N-acetylgalactosamine…
1099	GLCAT4g	chondroitin glucuronyltransferase II, Golgi apparatus	Chondroitin / heparan sulfate biosynthesis		( 54480.1 ) or ( 337876.1 ) or ( 79586.1 ) and ( 22856.1 )	0	1000	4	EC 2.4.1.226 NCD	Silbert JE, Sugumaran G#TITLE:Biosynthesis of chondroitin/dermatan sulfate#JOURNAL:IUBMB Life#YEAR:2002#PUBMED:12512856#;Gotoh M, Yada T, Sato T, Akashima T, Iwasaki H, Mochizuki H, Inaba N, Togayachi A, Kudo T, Watanabe H, Kimata K, Narimatsu H#TITLE:Molecular cloning and characterization of a novel chondroitin sulfate glucuronyltransferase that transfers glucuronic acid to N-acetylgalactosamine…
1100	GLCAT5g	chondroitin glucuronyltransferase II, Golgi apparatus	Chondroitin / heparan sulfate biosynthesis		( 54480.1 ) or ( 337876.1 ) or ( 79586.1 ) and ( 22856.1 )	0	1000	4	EC 2.4.1.226 NCD	Silbert JE, Sugumaran G#TITLE:Biosynthesis of chondroitin/dermatan sulfate#JOURNAL:IUBMB Life#YEAR:2002#PUBMED:12512856#;Gotoh M, Yada T, Sato T, Akashima T, Iwasaki H, Mochizuki H, Inaba N, Togayachi A, Kudo T, Watanabe H, Kimata K, Narimatsu H#TITLE:Molecular cloning and characterization of a novel chondroitin sulfate glucuronyltransferase that transfers glucuronic acid to N-acetylgalactosamine…
1101	GLCAT6g	heparan glucuronyltransferase II	Chondroitin / heparan sulfate biosynthesis		( 2131.1 and 2132.1 ) or ( 2131.1 and 2132.2 )	0	1000	4	EC 2.4.1.225 NCD	McCormick C, Duncan G, Goutsos KT, Tufaro F#TITLE:The putative tumor suppressors EXT1 and EXT2 form a stable complex that accumulates in the Golgi apparatus and catalyzes the synthesis of heparan sulfate#JOURNAL:Proc Natl Acad Sci U S A.#YEAR:2000#PUBMED:10639137#;Kobayashi S, Morimoto K, Shimizu T, Takahashi M, Kurosawa H, Shirasawa T#TITLE:Association of EXT1 and EXT2, hereditary multiple exost…
1102	GLCAT7g	heparan glucuronyltransferase II	Chondroitin / heparan sulfate biosynthesis		( 2131.1 and 2132.1 ) or ( 2131.1 and 2132.2 )	0	1000	4	EC 2.4.1.225 NCD	McCormick C, Duncan G, Goutsos KT, Tufaro F#TITLE:The putative tumor suppressors EXT1 and EXT2 form a stable complex that accumulates in the Golgi apparatus and catalyzes the synthesis of heparan sulfate#JOURNAL:Proc Natl Acad Sci U S A.#YEAR:2000#PUBMED:10639137#;Kobayashi S, Morimoto K, Shimizu T, Takahashi M, Kurosawa H, Shirasawa T#TITLE:Association of EXT1 and EXT2, hereditary multiple exost…
1103	GLCAT8g	heparan glucuronyltransferase II	Chondroitin / heparan sulfate biosynthesis		( 2131.1 and 2132.1 ) or ( 2131.1 and 2132.2 )	0	1000	4	EC 2.4.1.225 NCD	McCormick C, Duncan G, Goutsos KT, Tufaro F#TITLE:The putative tumor suppressors EXT1 and EXT2 form a stable complex that accumulates in the Golgi apparatus and catalyzes the synthesis of heparan sulfate#JOURNAL:Proc Natl Acad Sci U S A.#YEAR:2000#PUBMED:10639137#;Kobayashi S, Morimoto K, Shimizu T, Takahashi M, Kurosawa H, Shirasawa T#TITLE:Association of EXT1 and EXT2, hereditary multiple exost…
1104	GLCAT9g	heparan glucuronyltransferase II	Chondroitin / heparan sulfate biosynthesis		( 2131.1 and 2132.1 ) or ( 2131.1 and 2132.2 )	0	1000	4	EC 2.4.1.225 NCD	McCormick C, Duncan G, Goutsos KT, Tufaro F#TITLE:The putative tumor suppressors EXT1 and EXT2 form a stable complex that accumulates in the Golgi apparatus and catalyzes the synthesis of heparan sulfate#JOURNAL:Proc Natl Acad Sci U S A.#YEAR:2000#PUBMED:10639137#;Kobayashi S, Morimoto K, Shimizu T, Takahashi M, Kurosawa H, Shirasawa T#TITLE:Association of EXT1 and EXT2, hereditary multiple exost…
1105	GLCATg	UDP-D-glucuronate:galactosylgalactosylxylose glucuronosyltransferase, Golgi apparatus	Chondroitin / heparan sulfate biosynthesis	2.4.1.135	( 27087.2 ) or ( 135152.1 ) or ( 27087.1 ) or ( 26229.1 )	0	1000	4	NCD	Silbert JE, Sugumaran G#TITLE:Biosynthesis of chondroitin/dermatan sulfate#JOURNAL:IUBMB Life#YEAR:2002#PUBMED:12512856#;Marcos I, Galan JJ, Borrego S, Antinolo G#TITLE:Cloning, characterization, and chromosome mapping of the human GlcAT-S gene#JOURNAL:J Hum Genet#YEAR:2002#PUBMED:12522689#;Kitagawa H, Tone Y, Tamura J, Neumann KW, Ogawa T, Oka S, Kawasaki T, Sugahara K#TITLE:Molecular cloning an…
1106	GLCNACASE1ly	alpha-N-acetylglucosaminidase, lysosomal	Heparan sulfate degradation	3.2.1.50	( 4669.1 )	0	1000	4	NCD	Weber B, Blanch L, Clements PR, Scott HS, Hopwood JJ#TITLE:Cloning and expression of the gene involved in Sanfilippo B syndrome (mucopolysaccharidosis III B)#JOURNAL:Hum Mol Genet#YEAR:1996#PUBMED:8776591#;Sasaki T, Sukegawa K, Masue M, Fukuda S, Tomatsu S, Orii T#TITLE:Purification and partial characterization of alpha-N-acetylglucosaminidase from human liver#JOURNAL:J Biochem (Tokyo)#YEAR:1991#…
1107	GLCNACASE2ly	alpha-N-acetylglucosaminidase, lysosomal	Heparan sulfate degradation	3.2.1.50	( 4669.1 )	0	1000	4	NCD	Weber B, Blanch L, Clements PR, Scott HS, Hopwood JJ#TITLE:Cloning and expression of the gene involved in Sanfilippo B syndrome (mucopolysaccharidosis III B)#JOURNAL:Hum Mol Genet#YEAR:1996#PUBMED:8776591#;Sasaki T, Sukegawa K, Masue M, Fukuda S, Tomatsu S, Orii T#TITLE:Purification and partial characterization of alpha-N-acetylglucosaminidase from human liver#JOURNAL:J Biochem (Tokyo)#YEAR:1991#…
1108	GLCNACASE3ly	alpha-N-acetylglucosaminidase, lysosomal	Heparan sulfate degradation	3.2.1.50	( 4669.1 )	0	1000	4	NCD	Weber B, Blanch L, Clements PR, Scott HS, Hopwood JJ#TITLE:Cloning and expression of the gene involved in Sanfilippo B syndrome (mucopolysaccharidosis III B)#JOURNAL:Hum Mol Genet#YEAR:1996#PUBMED:8776591#;Sasaki T, Sukegawa K, Masue M, Fukuda S, Tomatsu S, Orii T#TITLE:Purification and partial characterization of alpha-N-acetylglucosaminidase from human liver#JOURNAL:J Biochem (Tokyo)#YEAR:1991#…
1109	GLCNACASE4ly	alpha-N-acetylglucosaminidase, lysosomal	Heparan sulfate degradation	3.2.1.50	( 4669.1 )	0	1000	4	NCD	Weber B, Blanch L, Clements PR, Scott HS, Hopwood JJ#TITLE:Cloning and expression of the gene involved in Sanfilippo B syndrome (mucopolysaccharidosis III B)#JOURNAL:Hum Mol Genet#YEAR:1996#PUBMED:8776591#;Sasaki T, Sukegawa K, Masue M, Fukuda S, Tomatsu S, Orii T#TITLE:Purification and partial characterization of alpha-N-acetylglucosaminidase from human liver#JOURNAL:J Biochem (Tokyo)#YEAR:1991#…
1110	GLCNACASE5ly	alpha-N-acetylglucosaminidase, lysosomal	Heparan sulfate degradation	3.2.1.50	( 4669.1 )	0	1000	4	NCD	Weber B, Blanch L, Clements PR, Scott HS, Hopwood JJ#TITLE:Cloning and expression of the gene involved in Sanfilippo B syndrome (mucopolysaccharidosis III B)#JOURNAL:Hum Mol Genet#YEAR:1996#PUBMED:8776591#;Sasaki T, Sukegawa K, Masue M, Fukuda S, Tomatsu S, Orii T#TITLE:Purification and partial characterization of alpha-N-acetylglucosaminidase from human liver#JOURNAL:J Biochem (Tokyo)#YEAR:1991#…
1111	GLCNACDASg	GlcNAc N-deacetylase / N-sulfotransferase	Chondroitin / heparan sulfate biosynthesis		( 64579.1 ) or ( 3340.1 ) or ( 9348.1 ) or ( 8509.1 )	0	1000	4	NCD	Varki, Cummings, Esko, Freeze, Hart, Marth#TITLE:Essentials of Glycobiology#YEAR:1999#;Dixon J, Loftus SK, Gladwin AJ, Scambler PJ, Wasmuth JJ, Dixon MJ#TITLE:Cloning of the human heparan sulfate-N-deacetylase/N-sulfotransferase gene from the Treacher Collins syndrome candidate region at 5q32-q33.1#JOURNAL:Genomics#YEAR:1995#PUBMED:7601448#;Humphries DE, Sullivan BM, Aleixo MD, Stow JL#TITLE:Loca…
1112	GLCNACPT_L	UDP-GlcNAc:dolichol-phosphate GlcNAc phosphotransferase (liver)	N-Glycan Biosynthesis	2.7.8.15	( 1798.1 ) or ( 1798.2 )	0	1000	0	NCD	Varki, Cummings, Esko, Freeze, Hart, Marth#TITLE:Essentials of Glycobiology#YEAR:1999#
1113	GLCNACPT_U	UDP-GlcNAc:dolichol-phosphate GlcNAc phosphotransferase (uterus)	N-Glycan Biosynthesis	2.7.8.15	( 1798.1 ) or ( 1798.2 )	0	1000	0	NCD	Varki, Cummings, Esko, Freeze, Hart, Marth#TITLE:Essentials of Glycobiology#YEAR:1999#
1114	GLCNACT1g	alpha-N-acetylglucosaminyltransferase I, Golgi apparatus	Chondroitin / heparan sulfate biosynthesis		( 2137.1 ) or ( 2135.1 )	0	1000	4	EC 2.4.1.223 NCD	Wuyts W, Van Hul W, Hendrickx J, Speleman F, Wauters J, De Boulle K, Van Roy N, Van Agtmael T, Bossuyt P, Willems PJ#TITLE:Identification and characterization of a novel member of the EXT gene family, EXTL2#JOURNAL:Eur J Hum Genet#YEAR:1997#PUBMED:9450183#;Saito T, Seki N, Yamauchi M, Tsuji S, Hayashi A, Kozuma S, Hori T#TITLE:Structure, chromosomal location, and expression profile of EXTR1 and E…
1115	GLCNACT2g	alpha-N-acetylglucosaminyltransferase II	Chondroitin / heparan sulfate biosynthesis		( 2131.1 and 2132.2 ) or ( 2137.1 ) or ( 2131.1 and 2132.1 ) or ( 2134.1 )	0	1000	4	EC 2.4.1.224 NCD	Saito T, Seki N, Yamauchi M, Tsuji S, Hayashi A, Kozuma S, Hori T#TITLE:Structure, chromosomal location, and expression profile of EXTR1 and EXTR2, new members of the multiple exostoses gene family#JOURNAL:Biochem Biophys Res Commun#YEAR:1998#PUBMED:9473480#;Sugahara K, Kitagawa H#TITLE:Heparin and heparan sulfate biosynthesis#JOURNAL:IUBMB Life#YEAR:2002#PUBMED:12512855#;Kim BT, Kitagawa H, Tamu…
1116	GLCNACT3g	alpha-N-acetylglucosaminyltransferase II	Chondroitin / heparan sulfate biosynthesis		( 2131.1 and 2132.2 ) or ( 2137.1 ) or ( 2131.1 and 2132.1 ) or ( 2134.1 )	0	1000	4	EC 2.4.1.224 NCD	Saito T, Seki N, Yamauchi M, Tsuji S, Hayashi A, Kozuma S, Hori T#TITLE:Structure, chromosomal location, and expression profile of EXTR1 and EXTR2, new members of the multiple exostoses gene family#JOURNAL:Biochem Biophys Res Commun#YEAR:1998#PUBMED:9473480#;Sugahara K, Kitagawa H#TITLE:Heparin and heparan sulfate biosynthesis#JOURNAL:IUBMB Life#YEAR:2002#PUBMED:12512855#;Kim BT, Kitagawa H, Tamu…
1117	GLCNACT4g	alpha-N-acetylglucosaminyltransferase II	Chondroitin / heparan sulfate biosynthesis		( 2131.1 and 2132.2 ) or ( 2137.1 ) or ( 2131.1 and 2132.1 ) or ( 2134.1 )	0	1000	4	EC 2.4.1.224 NCD	Saito T, Seki N, Yamauchi M, Tsuji S, Hayashi A, Kozuma S, Hori T#TITLE:Structure, chromosomal location, and expression profile of EXTR1 and EXTR2, new members of the multiple exostoses gene family#JOURNAL:Biochem Biophys Res Commun#YEAR:1998#PUBMED:9473480#;Sugahara K, Kitagawa H#TITLE:Heparin and heparan sulfate biosynthesis#JOURNAL:IUBMB Life#YEAR:2002#PUBMED:12512855#;Kim BT, Kitagawa H, Tamu…
1118	GLCNACT5g	alpha-N-acetylglucosaminyltransferase II	Chondroitin / heparan sulfate biosynthesis		( 2131.1 and 2132.2 ) or ( 2137.1 ) or ( 2131.1 and 2132.1 ) or ( 2134.1 )	0	1000	4	EC 2.4.1.224 NCD	Saito T, Seki N, Yamauchi M, Tsuji S, Hayashi A, Kozuma S, Hori T#TITLE:Structure, chromosomal location, and expression profile of EXTR1 and EXTR2, new members of the multiple exostoses gene family#JOURNAL:Biochem Biophys Res Commun#YEAR:1998#PUBMED:9473480#;Sugahara K, Kitagawa H#TITLE:Heparin and heparan sulfate biosynthesis#JOURNAL:IUBMB Life#YEAR:2002#PUBMED:12512855#;Kim BT, Kitagawa H, Tamu…
1119	GLCNACT_L	UDP-GlcNAc:N-acetyl-D-glucosaminyl diphosphodolichol N-acetyl-D-glucosaminyltransferase (liver)	N-Glycan Biosynthesis	2.4.1.141		0	1000	0	NCD
1120	GLCNACT_U	UDP-GlcNAc:N-acetyl-D-glucosaminyl diphosphodolichol N-acetyl-D-glucosaminyltransferase (uterus)	N-Glycan Biosynthesis	2.4.1.141		0	1000	0	NCD
1121	GLCURter	glucuronate endoplasmic reticular transport	Transport, Endoplasmic Reticular			0	1000	1	NCD
1122	GLCURtly	glucuronate transport into lysososme	Transport, Lysosomal		( 26503.1 )	-1000	1000	4	H symport into lysososome. See PMID: 2768261 and PMID: 10581036 ( for human evidence). Sialic acid storage disorders (due to transporter mutations) require import and export e.g. PMID: 2768266 NJ renamed from GLCURlt to GLCURtly - NCD	Mancini GM, de Jonge HR, Galjaard H, Verheijen FW.#TITLE:Characterization of a proton-driven carrier for sialic acid in the lysosomal membrane. Evidence for a group-specific transport system for acidic monosaccharides.#JOURNAL:J Biol Chem#YEAR:1989#PUBMED:2768261#;Verheijen FW, Verbeek E, Aula N, Beerens CE, Havelaar AC, Joosse M, Peltonen L, Aula P, Galjaard H, van der Spek PJ, Mancini GM.#TITLE…
1123	GLCt1r	glucose transport (uniport)	Transport, Extracellular		( 66035.1 ) or ( 6517.1 ) or ( 56606.1 ) or ( 154091.1 ) or ( 6513.1 ) or ( 11182.1 ) or ( 29988.1 ) or ( 6514.1 ) or ( 155184.1 ) or ( 56606.2 ) or ( 144195.1 ) or ( 6515.1 ) or ( 81031.1 )	-1000	1000	4	LOCUS:_6515#TRANSCRIPT:1#ABBREVIATION:SLC2A3#	Hosokawa M, Thorens B#TITLE:Glucose release from GLUT2-null hepatocytes: characterization of a major and a minor pathway#JOURNAL:Am J Physiol Endocrinol Metab#YEAR:2002#PUBMED:11882499#;Guillam MT, Burcelin R, Thorens B#TITLE:Normal hepatic glucose production in the absence of GLUT2 reveals an alternative pathway for glucose release from hepatocytes#JOURNAL:Proc Natl Acad Sci U S A#YEAR:1998#PUBM…
1124	GLCt4	glucose transport via sodium symport	Transport, Extracellular		( 200010.1 ) or ( 159963.1 ) or ( 6526.1 ) or ( 125206.1 ) or ( 6524.1 )	-1000	1000	4	NCD	Kanai Y, Lee WS, You G, Brown D, Hediger MA#TITLE:The human kidney low affinity Na+/glucose cotransporter SGLT2. Delineation of the major renal reabsorptive mechanism for D-glucose#JOURNAL:J Clin Invest#YEAR:1994#PUBMED:8282810#;Wells RG, Pajor AM, Kanai Y, Turk E, Wright EM, Hediger MA#TITLE:Cloning of a human kidney cDNA with similarity to the sodium-glucose cotransporter#JOURNAL:Am J Physiol#Y…
1125	GLCtg	glucose transport, Golgi apparatus	Transport, Golgi Apparatus		( 6513.1 )	-1000	1000	4	NCD	Haney PM#TITLE:Glucose transport in lactation#JOURNAL:Adv Exp Med Biol#YEAR:2004#PUBMED:15384581#
1126	GLCtly	glucose efflux from lysosome	Transport, Lysosomal			0	1000	2	NCD	Pisoni RL, Thoene JG#TITLE:The transport systems of mammalian lysosomes#JOURNAL:Biochim Biophys Acta#YEAR:1991#PUBMED:1751541#;Lloyd JB#TITLE:Metabolite efflux and influx across the lysosome membrane#JOURNAL:Subcell Biochem#YEAR:1996#PUBMED:8993166#
1127	GLDBRAN	glycogen debranching enzyme	Starch and Sucrose Metabolism	3.2.1.33	( 178.4 ) or ( 178.5 ) or ( 178.1 ) or ( 178.3 ) or ( 178.2 ) or ( 178.6 )	0	1000	4	lumped reaction, combination of 4-alpha-D-glucanotransferase (2.4.1.25) and amylo-alpha-1,6-glucosidase (3.2.1.33) NCD	Devlin, TM#TITLE:Textbook of Biochemistry with Clinical Correlations#YEAR:2001#;Yang BZ, Ding JH, Enghild JJ, Bao Y, Chen YT#TITLE:Molecular cloning and nucleotide sequence of cDNA encoding human muscle glycogen debranching enzyme#JOURNAL:J Biol Chem#YEAR:1992#PUBMED:1374391#
1128	GLGNS1	glycogen synthase (ggn -> glygn1)	Starch and Sucrose Metabolism	2.4.1.11	( 8908.1 ) and ( 2997.1 ) or ( 2998.1 ) and ( 2992.1 ) or ( 2997.1 ) and ( 2992.1 ) or ( 8908.1 ) and ( 2998.1 )	0	1000	2	NCD	Lomako J, Lomako WM, Whelan WJ#TITLE:Glycogenin: the primer for mammalian and yeast glycogen synthesis#JOURNAL:Biochim Biophys Acta#YEAR:2004#PUBMED:15238248#
1129	GLNS	glutamine synthetase	Glutamate metabolism	6.3.1.2	( 2752.1 ) or ( 51557.1 )	0	1000	2	LOCUS:_2752#TRANSCRIPT:1#ABBREVIATION:GLUL#ECNUMBERS:6.3.1.2#	Gibbs CS, Campbell KE, Wilson RH.#TITLE:Sequence of a human glutamine synthetase cDNA.#YEAR:1987#PUBMED:2888076#
1130	GLNtN1	Glutamine transport (Na, H coupled)	Transport, Extracellular		( 92745.1 ) or ( 10991.1 )	-1000	1000	4	SAB based om PMID 10823827	Fei YJ, Sugawara M, Nakanishi T, Huang W, Wang H, Prasad PD, Leibach FH, Ganapathy V#TITLE:Primary structure, genomic organization, and functional and electrogenic characteristics of human system N 1, a Na+- and H+-coupled glutamine transporter#JOURNAL:J Biol Chem#YEAR:2000#PUBMED:10823827#;Mackenzie B, Erickson JD#TITLE:Sodium-coupled neutral amino acid (System N/A) transporters of the SLC38 gen…
1131	GLNtm	L-glutamine transport via electroneutral transporter	Transport, Mitochondrial			0	1000	2	TV (6/7/2005) Study in rat liver (Soboll, 1991)
1132	GLPASE1	glycogen phosphorylase (glygn2 -> dxtrn)	Starch and Sucrose Metabolism	2.4.1.1	( 5834.1 ) or ( 5837.1 ) or ( 5836.1 )	0	1000	4	NCD	Devlin, TM#TITLE:Textbook of Biochemistry with Clinical Correlations#YEAR:2001#;Newgard CB, Littman DR, van Genderen C, Smith M, Fletterick RJ#TITLE:Human brain glycogen phosphorylase. Cloning, sequence analysis, chromosomal mapping, tissue expression, and comparison with the human liver and muscle isozymes#JOURNAL:J Biol Chem#YEAR:1988#PUBMED:3346228#
1133	GLPASE2	glycogen phosphorylase (amyls -> glc-D)	Starch and Sucrose Metabolism	2.4.1.1	( 5834.1 ) or ( 5836.1 ) or ( 5837.1 )	0	1000	4	NCD	Newgard CB, Littman DR, van Genderen C, Smith M, Fletterick RJ#TITLE:Human brain glycogen phosphorylase. Cloning, sequence analysis, chromosomal mapping, tissue expression, and comparison with the human liver and muscle isozymes#JOURNAL:J Biol Chem#YEAR:1988#PUBMED:3346228#
1134	GLU5Km	glutamate 5-kinase (m)	Urea cycle/amino group metabolism	2.7.2.11	( 5832.1 )	0	1000	2	SAB m	Hu CA, Lin WW, Obie C, Valle D#TITLE:Molecular enzymology of mammalian Delta1-pyrroline-5-carboxylate synthase. Alternative splice donor utilization generates isoforms with different sensitivity to ornithine inhibition#JOURNAL:J Biol Chem#YEAR:1999#PUBMED:10037775#
1135	GLUCYS	gamma-glutamylcysteine synthetase	Glutathione Metabolism	6.3.2.2	( 2729.1 ) and ( 2730.1 )	0	1000	4	NCD	Gipp JJ, Bailey HH, Mulcahy RT.#TITLE:Cloning and sequencing of the cDNA for the light subunit of human liver gamma-glutamylcysteine synthetase and relative mRNA levels for heavy and light subunits in human normal tissues.#JOURNAL:Biochem Biophys Res Commun.#YEAR:1995#PUBMED:7826375#
1136	GLUDC	Glutamate Decarboxylase	Glutamate metabolism	4.1.1.15	( 2571.1 ) or ( 2572.1 ) or ( 2571.2 )	0	1000	4	JLR- added h to balance	Bu DF, Tobin AJ. #TITLE:The exon-intron organization of the genes (GAD1 and GAD2) encoding two human glutamate decarboxylases (GAD67 and GAD65) suggests that they derive from a common ancestral GAD.#YEAR:1994#PUBMED:8088791#;Karlsen AE, Hagopian WA, Grubin CE, Dube S, Disteche CM, Adler DA, Barmeier H, Mathewes S, Grant FJ, Foster D, et al.#TITLE:Cloning and primary structure of a human islet iso…
1137	GLUNm	glutaminase (mitochondrial)	Glutamate metabolism	3.5.1.2	( 2744.1 ) or ( 27165.2 ) or ( 27165.1 )	166.769	1000	4	LOCUS:_27165#TRANSCRIPT:1#ABBREVIATION:GA#ECNUMBERS:3.5.1.2#	Holcomb T, Taylor L, Trohkimoinen J, Curthoys NP.#TITLE:Isolation, characterization and expression of a human brain mitochondrial glutaminase cDNA. #YEAR:2000#PUBMED:10719215#;Zacharias DP, Lima MM, Souza AL Jr, de Abranches Oliveira Santos ID, Enokiara M, Michalany N, Curi R.#TITLE:Human cutaneous melanoma expresses a significant phosphate-dependent glutaminase activity: a comparison with the su…
1138	GLUPRT	glutamine phosphoribosyldiphosphate amidotransferase	IMP Biosynthesis	2.4.2.14	( 5471.1 )	0	1000	4	LOCUS:_5471#TRANSCRIPT:1#ABBREVIATION:PPAT#ECNUMBERS:2.4.2.14#	Chen S, Nagy PL, Zalkin H#TITLE:Role of NRF-1 in bidirectional transcription of the human GPAT-AIRC purine biosynthesis locus.#JOURNAL: Nucleic Acids Res. #YEAR:1997#PUBMED:9108165#;Iwahana H, Oka J, Mizusawa N, Kudo E, Ii S, Yoshimoto K, Holmes EW, Itakura M. #TITLE:Molecular cloning of human amidophosphoribosyltransferase. #JOURNAL:Biochem Biophys Res Commun.#YEAR:1993#PUBMED:8380692#;Brayton K…
1139	GLUTCOADHm	glutaryl-CoA dehydrogenase (mitochondria)	Tryptophan metabolism	1.3.99.7	( 2639.1 ) or ( 2639.2 )	0	1000	2	SAB use of FAD is not certain
1140	GLUVESSEC	L-glutamate secretion via secretory vesicle (ATP driven)	Transport, Extracellular		( 57084.1 ) or ( 246213.1 ) or ( 57030.1 )	0	1000	4	SAB This reaction represents the ATP driven secretion of glu from the cell. It leaves out the vesicle because a compartment is not available for that. ATP demand is not known stoichiometrically.	Reimer RJ, Edwards RH#TITLE:Organic anion transport is the primary function of the SLC17/type I phosphate transporter family#JOURNAL:Pflugers Arch#YEAR:2004#PUBMED:12811560#;Bai L, Xu H, Collins JF, Ghishan FK#TITLE:Molecular and functional analysis of a novel neuronal vesicular glutamate transporter#JOURNAL:J Biol Chem#YEAR:2001#PUBMED:11432869#;Wagner CA, Finberg KE, Breton S, Marshansky V, Bro…
1141	GLUt2m	L-glutamate reversible transport via proton symport, mitochondrial	Transport, Mitochondrial		( 83733.1 ) or ( 8604.1 ) or ( 79751.1 ) or ( 10165.1 )	-1000	1000	4	NCD	Palmieri, F.#TITLE: The mitochondrial transporter family (SLC25): physiological and pathological implications.#JOURNAL: Pflugers Archive#YEAR:2004#PUBMED:14598172#
1142	GLUt6	Glutamate transport via Na, H symport and K antiport	Transport, Extracellular		( 6511.1 ) or ( 6505.1 ) or ( 6507.1 ) or ( 6506.1 ) or ( 6512.1 )	0	1000	4	SAB see Kanai and Hediger 2003	Kanai Y, Hediger MA#TITLE:The glutamate/neutral amino acid transporter family SLC1: molecular, physiological and pharmacological aspects#JOURNAL:Pflugers Arch#YEAR:2004#PUBMED:14530974#
1143	GLUt7l	Glutamate transport, lysosomal	Transport, Lysosomal			0	1000	1	IT
1144	GLUtr	intracellular transport	Transport, Endoplasmic Reticular			-1000	1000	1	unknown mechanism, needed to transport glu-L out of ER in conversion of leuktrC4-&gt; leuktrD4 NJ
1145	GLXO1	glyoxylate oxidase	Glyoxylate and Dicarboxylate Metabolism	1.2.3.5	( 3939.1 ) or ( 55293.1 ) or ( 3945.1 and 3939.1 ) or ( 197257.1 ) or ( 92483.1 ) or ( 3945.1 ) or ( 160287.1 ) or ( 3948.1 ) or ( 197257.2 ) or ( 3948.2 )	0	1000	4	NCD	Devlin, TM#TITLE:Textbook of Biochemistry with Clinical Correlations#YEAR:2001#;Orten JM, Neuhaus OW.#TITLE:Human Biochemistry#YEAR:1975#;Holmes RP, Assimos DG#TITLE:Glyoxylate synthesis, and its modulation and influence on oxalate synthesis#JOURNAL:J Urol#YEAR:1998#PUBMED:9783918#;Holmes RP#TITLE:Pharmacological approaches in the treatment of primary hyperoxaluria#JOURNAL:J Nephrol#YEAR:1998#PUB…
1146	GLXO2p	glyoxylate oxidase, peroxisomal	Glyoxylate and Dicarboxylate Metabolism		( 54363.1 ) or ( 51179.2 ) or ( 51179.1 )	0	1000	4	NCD	Jones JM, Morrell JC, Gould SJ#TITLE:Identification and characterization of HAOX1, HAOX2, and HAOX3, three human peroxisomal 2-hydroxy acid oxidases#JOURNAL:J Biol Chem#YEAR:2000#PUBMED:10777549#;Poore RE, Hurst CH, Assimos DG, Holmes RP#TITLE:Pathways of hepatic oxalate synthesis and their regulation#JOURNAL:Am J Physiol.#YEAR:1997#PUBMED:9038835#;Ushijima Y#TITLE:Identity of aliphatic L- -hydro…
1147	GLXtm	glyoxylate transport, mitochondrial	Transport, Mitochondrial			0	0	1	NCD	Baker PR, Cramer SD, Kennedy M, Assimos DG, Holmes RP.#TITLE:Glycolate and glyoxylate metabolism in HepG2 cells.#YEAR:2004#PUBMED:15240345#
1148	GLYAMDTRc	glycine amidinotransferase (c)	Urea cycle/amino group metabolism	2.1.4.1	( 2628.1 )	-1000	1000	4	SAB c	Isbrandt D, von Figura K#TITLE:Cloning and sequence analysis of human guanidinoacetate N-methyltransferase cDNA#JOURNAL:Biochim Biophys Acta#YEAR:1995#PUBMED:8547310#
1149	GLYATm	glycine C-acetyltransferase	Glycine, Serine, and Threonine Metabolism	2.3.1.29	( 23464.1 )	-1000	1000	2	LOCUS:_23464#TRANSCRIPT:1#ABBREVIATION:GCAT#ECNUMBERS:2.3.1.29#	Edgar,A.J. , Polak,J.M. #TITLE:Molecular cloning of the human and murine 2-amino-3-ketobutyrate coenzyme A ligase cDNAs.#YEAR:2000#PUBMED:10712613#
1150	GLYBt4(2)r	Betaine transport (sodium symport) (2:1)	Transport, Extracellular		( 6539.1 )	-1000	1000	4	SAB	Chen NH, Reith ME, Quick MW#TITLE:Synaptic uptake and beyond: the sodium- and chloride-dependent neurotransmitter transporter family SLC6#JOURNAL:Pflugers Arch#YEAR:2004#PUBMED:12719981#
1151	GLYBtm	Glycine betaine transport via diffusion (mitochondria to cytosol)	Transport, Mitochondrial			-1000	1000	2	MM	Porter RK, Scott JM, Brand MD.#TITLE:Characterization of betaine efflux from rat liver mitochondria.#YEAR:1993#PUBMED:8443213#
1152	GLYCK2	glycerate kinase	Glyoxylate and Dicarboxylate Metabolism	2.7.1.31		0	1000	2	JLR	Poore RE, Hurst CH, Assimos DG, Holmes RP#TITLE:Pathways of hepatic oxalate synthesis and their regulation#JOURNAL:Am J Physiol.#YEAR:1997#PUBMED:9038835#
1153	GLYCLTDy	Glycolate dehydrogenase (NADP)	Glyoxylate and Dicarboxylate Metabolism	1.1.1.26	( 9380.1 )	0	1000	4	JLR	Van Schaftingen E, Draye JP, Van Hoof F#TITLE:Coenzyme specificity of mammalian liver D-glycerate dehydrogenase#JOURNAL:Eur J Biochem#YEAR:1989#PUBMED:2689175#;Baker PR, Cramer SD, Kennedy M, Assimos DG, Holmes RP.#TITLE:Glycolate and glyoxylate metabolism in HepG2 cells.#YEAR:2004#PUBMED:15240345#;Taylor SW, Fahy E, Zhang B, Glenn GM, Warnock DE, Wiley S, Murphy AN, Gaucher SP, Capaldi RA, Gibso…
1154	GLYCLTtp	glycolate transport into peroxisome	Transport, Peroxisomal			0	1000	2	NCD	Baker PR, Cramer SD, Kennedy M, Assimos DG, Holmes RP.#TITLE:Glycolate and glyoxylate metabolism in HepG2 cells.#YEAR:2004#PUBMED:15240345#
1155	GLYCTO1p	Glycolate oxidase, peroxisome	Glyoxylate and Dicarboxylate Metabolism		( 51179.1 ) or ( 54363.1 ) or ( 51179.2 )	0	1000	4	tv NCD	Jones JM, Morrell JC, Gould SJ#TITLE:Identification and characterization of HAOX1, HAOX2, and HAOX3, three human peroxisomal 2-hydroxy acid oxidases#JOURNAL:J Biol Chem#YEAR:2000#PUBMED:10777549#;Poore RE, Hurst CH, Assimos DG, Holmes RP#TITLE:Pathways of hepatic oxalate synthesis and their regulation#JOURNAL:Am J Physiol.#YEAR:1997#PUBMED:9038835#;Ushijima Y#TITLE:Identity of aliphatic L- -hydro…
1156	GLYC_St	L-glycerate export	Transport, Extracellular			0	1000	1	NCD	Petrarulo M, Vitale C, Facchini P, Marangella M#TITLE:Biochemical approach to diagnosis and differentiation of primary hyperoxalurias: an update#JOURNAL:J Nephrol#YEAR:1998#PUBMED:9604805#
1157	GLYCt	glycerol transport via channel	Transport, Extracellular			-1000	1000	2	NCD	Champe, P.C., Harvey, R.A., Ferrier D.R.#TITLE:Biochemistry, 3rd edition#YEAR:2005#;Kuriyama H, Kawamoto S, Ishida N, Ohno I, Mita S, Matsuzawa Y, Matsubara K, Okubo K#TITLE:Molecular cloning and expression of a novel human aquaporin from adipose tissue with glycerol permeability#JOURNAL:Biochem Biophys Res Commun#YEAR:1997#PUBMED:9405233#
1158	GLYK	glycerol kinase	Glycerophospholipid Metabolism	2.7.1.30	( 2710.2 ) or ( 2712.1 ) or ( 2710.1 ) or ( 2713.1 )	0	1000	4	LOCUS:_2710#TRANSCRIPT:1#ABBREVIATION:GK#ECNUMBERS:2.7.1.30#	Voet D, Voet JG#TITLE:Biochemistry#YEAR:1995#;Murray RK, Granner DK, Mayes PA, Rodwell VW#TITLE:Harper&apos;s Biochemistry#YEAR:1999#;Guo W, Worley K, Adams V, Mason J, Sylvester-Jackson D, Zhang Y, Towbin JA, Fogt DD, Madu S, Wheeler DA, McCabe ERB#TITLE:Genomic scanning for expressed sequences in Xp21 identifies the glycerol kinase gene#JOURNAL:Nature Genetics#YEAR:1993#;Sargent CA, Young C, Ma…
1159	GLYOX	hydroxyacylglutathione hydrolase	Pyruvate Metabolism	3.1.2.6	( 3029.1 ) or ( 84264.2 ) or ( 84264.1 )	0	1000	4	IF	Cordell PA, Futers TS, Grant PJ, Pease RJ#TITLE:The Human hydroxyacylglutathione hydrolase (HAGH) gene encodes both cytosolic and mitochondrial forms of glyoxalase II.#JOURNAL:J Biol Chem#YEAR:2004#PUBMED:15117945#;Ridderstrom M, Saccucci F, Hellman U, Bergman T, Principato G, Mannervik B#TITLE:Molecular cloning, heterologous expression, and characterization of human glyoxalase II#JOURNAL:J Biol …
1160	GLYVESSEC	Glycine secretion via secretory vesicle (ATP driven)	Transport, Extracellular		( 140679.1 )	0	1000	4	SAB This reaction represents the ATP driven secretion of glu from the cell. It leaves out the vesicle because a compartment is not available for that. ATP demand is not known for sure stoichiometrically, but 1:1 H coupling ratio is assumed, which could translate to 3 gly/ATP.	Gasnier B#TITLE:The SLC32 transporter, a key protein for the synaptic release of inhibitory amino acids#JOURNAL:Pflugers Arch#YEAR:2004#PUBMED:12750892#;Wagner CA, Finberg KE, Breton S, Marshansky V, Brown D, Geibel JP#TITLE:Renal vacuolar H+-ATPase#JOURNAL:Physiol Rev#YEAR:2004#PUBMED:15383652#
1161	GLYt2r	glycine reversible transport via proton symport	Transport, Extracellular		( 206358.1 )	-1000	1000	2	NCD	Sagne C, Agulhon C, Ravassard P, Darmon M, Hamon M, El Mestikawy S, Gasnier B, Giros B#TITLE:Identification and characterization of a lysosomal transporter for small neutral amino acids#JOURNAL:Proc Natl Acad Sci U S A#YEAR:2001#PUBMED:11390972#;Boll M, Foltz M, Rubio-Aliaga I, Kottra G, Daniel H#TITLE:Functional characterization of two novel mammalian electrogenic proton-dependent amino acid cot…
1162	GLYt7(211)r	glycine reversible transport via sodium and chloride symport (2:1:1)	Transport, Extracellular		( 6536.1 ) or ( 6536.2 )	0	0	4	SAB	Chen NH, Reith ME, Quick MW#TITLE:Synaptic uptake and beyond: the sodium- and chloride-dependent neurotransmitter transporter family SLC6#JOURNAL:Pflugers Arch#YEAR:2004#PUBMED:12719981#
1163	GLYt7(311)r	glycine reversible transport via sodium and chloride symport (3:1:1)	Transport, Extracellular		( 9152.1 )	-1000	1000	4	SAB	Chen NH, Reith ME, Quick MW#TITLE:Synaptic uptake and beyond: the sodium- and chloride-dependent neurotransmitter transporter family SLC6#JOURNAL:Pflugers Arch#YEAR:2004#PUBMED:12719981#
1164	GLYtm	glycine passive transport to mitochondria	Transport, Mitochondrial			-1000	1000	4	TDV Biochim Biophys Acta. 1980 Jun 6;598(3):588-94	Benavides J, Garcia ML, Lopez-Lahoya J, Ugarte M, Valdivieso F.#TITLE: Glycine transport in rat brain and liver mitochondria. #JOURNAL:Biochim Biophys Acta#YEAR:1980#PUBMED:7388024#
1165	GMPR	GMP reductase	Nucleotides	1.7.1.7	( 2766.1 ) or ( 51292.1 ) or ( 51292.3 ) or ( 51292.2 )	0	1000	4	EC- changed from 1.7.1.7	Deng Y, Wang Z, Ying K, Gu S, Ji C, Huang Y, Gu X, Wang Y, Xu Y, Li Y, Xie Y, Mao Y.#TITLE:NADPH-dependent GMP reductase isoenzyme of human (GMPR2). Expression, purification, and kinetic properties.#JOURNAL:Int J Biochem Cell Biol.#YEAR:2002#PUBMED:12009299#;Murano I, Tsukahara M, Kajii T, Yoshida A.#TITLE:Mapping of the human guanosine monophosphate reductase gene (GMPR) to chromosome 6p23 by fl…
1166	GMPS2	GMP synthase	Nucleotides	6.3.5.2	( 8833.1 )	0	0	4	JLR	Nakamura J, Lou L. #TITLE:Biochemical characterization of human GMP synthetase.#JOURNAL: J Biol Chem. #YEAR:1995#PUBMED:7706277#
1167	GMPtn	GMP nuclear transport	Transport, Nuclear			-1000	1000	2	IT
1168	GND	phosphogluconate dehydrogenase	Pentose Phosphate Pathway	1.1.1.44	( 5226.1 )	0	45.3648	4	SMP Note no proton generation by the the reaction	Tsui SK, Chan JY, Waye MM, Fung KP, Lee CY#TITLE:Identification of a cDNA encoding 6-phosphogluconate dehydrogenase from a human heart cDNA library.#JOURNAL:Biochem Genet#YEAR:1996#PUBMED:8978909#
1169	GP1Cte	gp1c hs transport	Transport, Extracellular			-1000	1000	1	unknown mechanism for transport - intracellular transport occurs, most details are unknown - see for example Varki glycobiology text or numerous reviews (PMID: 8206147) - extracellular transport is also made available since metabolites can get to outer plasma membrane NJ	Varki, Cummings, Esko, Freeze, Hart, Marth#TITLE:Essentials of Glycobiology#YEAR:1999#;Sandhoff K, Klein A.#TITLE:Intracellular trafficking of glycosphingolipids: role of sphingolipid activator proteins in the topology of endocytosis and lysosomal digestion.#JOURNAL:FEBS Lett.#YEAR:1994#PUBMED:8206147#
1170	GP1Ctg	gp1c hs intracellular transport	Transport, Golgi Apparatus			-1000	1000	1	unknown mechanism for transport - intracellular transport occurs, most details are unknown - see for example Varki glycobiology text or numerous reviews (PMID: 8206147) NJ	Varki, Cummings, Esko, Freeze, Hart, Marth#TITLE:Essentials of Glycobiology#YEAR:1999#;Sandhoff K, Klein A.#TITLE:Intracellular trafficking of glycosphingolipids: role of sphingolipid activator proteins in the topology of endocytosis and lysosomal digestion.#JOURNAL:FEBS Lett.#YEAR:1994#PUBMED:8206147#
1171	GPAM_hs	glycerol-3-phosphate acyltransferase	Triacylglycerol Synthesis	2.3.1.15	( 57678.1 )	0	1000	4	NJ	Voet D, Voet JG#TITLE:Biochemistry#YEAR:1995#;Coleman RA, Lee DP#TITLE:Enzymes of triacylglycerol synthesis and their regulation#JOURNAL:Prog in Lipid Research#YEAR:2004#
1172	GPDDA1	Glycerophosphodiester phosphodiesterase (Glycerophosphocholine)	Glycerophospholipid Metabolism	3.1.4.46		0	1000	0	JLR	Murray RK, Granner DK, Mayes PA, Rodwell VW#TITLE:Harper&apos;s Biochemistry#YEAR:1999#
[truncated: 1,834 more rows]
