# Supplementary material for: Integrating Machine Learning with Metabolic Models for Precision Trauma Care: Personalized ENDOTYPE Stratification and Metabolic Target Identification
Source: Research Square preprint supplement (doi:10.21203/rs.3.rs-6258357/v1), 2025-03-27
Supplement: Supplementary file 2 [file 855dfae40fc7c5e6febafd89.xlsx]

## Sheet: Overview
		SHAP Values Analysis
		GEM Analysis, 7 MSR
		GEM Analysis, 44 TMR

## Sheet: SHAP_Endotype_A
GEM Reaction index	SHAP mean
1951	0.65353
2249	0.649402
2227	0.545777
1234	0.524703
2744	0.441883
1185	0.438206
2055	0.437158
1334	0.421476
32	0.404411
89	0.306866
2461	0.28317
2397	0.271883
2450	0.263807
423	0.250075
2239	0.249165
2393	0.20306
2483	0.177554
2378	0.176001
2288	0.156516
2429	0.153955
1579	0.144607
466	0.136102
534	0.135184
1416	0.111688
940	0.101918
2474	0.0803633
16	0.0763392
2400	0.0650592
2420	0.0636441
1189	0.0596231
232	0.0587806
2392	0.0569883
2481	0.0532878
2423	0.0531042
1200	0.0529079
383	0.048806
473	0.0439398
2443	0.0413342
2493	0.0411402
2452	0.0398876
2603	0.0388451
1541	0.0379295
2007	0.0373903
75	0.0347867
191	0.034525
447	0.0328257
960	0.0326991
86	0.0319392
2484	0.0317983
96	0.0301192
1554	0.0268271
2422	0.0268041
2673	0.0248389
2272	0.024492
1812	0.0236795
480	0.0232344
2280	0.022919
1927	0.0219298
2479	0.0215691
250	0.0211391
475	0.0210761
1781	0.020926
2436	0.0199982
2568	0.0195802
2433	0.0190789
1160	0.0190498
1299	0.0188268
2290	0.0185049
2738	0.018249
2415	0.0180859
2832	0.0177082
2840	0.0175687
2403	0.016949
2430	0.0148506
755	0.0146844
2030	0.0141448
1733	0.0139144
2487	0.0128645
1782	0.0123875
865	0.0118487
2490	0.0118478
2592	0.011831
2460	0.0110873
1524	0.0108894
169	0.0107304
249	0.0105471
2469	0.010348
1386	0.0103299
1199	0.0101507
108	0.0100132
1757	0.00976167
611	0.00942172
122	0.00885565
130	0.0085304
2454	0.00821537
2210	0.0080798
1556	0.00797021
2314	0.0078068
2464	0.00765323
2410	0.00724032
2448	0.00719593
1565	0.00716346
315	0.00702866
479	0.00681184
2466	0.00650445
2106	0.00641663
1297	0.00634481
686	0.0061652
2250	0.006161
1661	0.00610986
2102	0.00602713
1930	0.00596754
2439	0.00582508
416	0.00578035
2667	0.00563159
1293	0.00555452
2446	0.00554324
2371	0.00542251
300	0.00537872
263	0.00537073
129	0.00533573
2286	0.0053188
311	0.00521948
45	0.00516964
41	0.00509591
2065	0.00502285
2807	0.00497388
2593	0.00493758
375	0.00487723
150	0.00485477
927	0.00482823
1338	0.00476908
2278	0.0046524
462	0.00461024
2425	0.0044114
1764	0.0043676
1161	0.00430801
2445	0.00427578
2424	0.00423494
2300	0.00415977
85	0.00402341
2769	0.00402045
76	0.00384518
307	0.00365781
2497	0.00358264
2802	0.00357342
213	0.00355919
2391	0.00353054
2308	0.0034721
1537	0.00327759
844	0.00326718
124	0.00323624
1816	0.00319777
2495	0.00311874
2432	0.00311591
2875	0.00300163
365	0.00288301
2861	0.00275278
2587	0.00275086
1975	0.0026779
2394	0.0026415
675	0.00261789
2544	0.00259174
2805	0.00256682
306	0.00253535
1553	0.00249
1712	0.00245169
2311	0.00239219
196	0.00238314
152	0.00237866
2279	0.00233758
1309	0.00229872
1665	0.00227915
316	0.00221681
2451	0.00211923
1250	0.00201661
1421	0.00199899
223	0.0019777
2418	0.00192734
535	0.00190087
2467	0.00189841
151	0.00188782
1534	0.00184704
378	0.0018259
1130	0.00182319
414	0.0017742
1734	0.00170087
253	0.00169542
457	0.00168962
2730	0.0016619
426	0.0016573
681	0.00164171
1632	0.00162011
2453	0.00161626
598	0.00158836
200	0.0015819
364	0.00155355
2486	0.00154125
2116	0.00153134
796	0.00143545
2894	0.00142293
759	0.00140488
131	0.00140438
2412	0.00140061
730	0.00139281
1824	0.00138493
1920	0.0013823
2166	0.00136132
1024	0.00135949
415	0.00135655
2390	0.00134955
1823	0.00133952
849	0.00132803
1298	0.00132623
1473	0.00132202
2396	0.001307
2494	0.00126035
2470	0.00123694
2531	0.0012174
87	0.0012126
83	0.00120782
2115	0.00117892
1825	0.00117369
1616	0.00115214
1878	0.00112501
2167	0.00112162
1688	0.00108197
806	0.00106889
114	0.0010635
1419	0.00105526
2590	0.00103529
1683	0.00102754
256	0.00102288
2485	0.00101724
2419	0.00101664
2387	0.00097349
822	0.000968444
580	0.000957034
1025	0.000933881
2240	0.000929247
194	0.000915113
2395	0.000903655
1318	0.000896857
1466	0.000882228
1559	0.000882018
251	0.000857669
106	0.000839475
710	0.000827545
1053	0.000820679
2417	0.000820035
2576	0.000816734
2478	0.000813173
2195	0.000811831
1571	0.000804124
2317	0.000785506
379	0.000769009
1211	0.000759414
1460	0.000757667
344	0.000737268
157	0.000728427
2480	0.000721347
2081	0.000719649
1231	0.00071844
1123	0.000709221
1868	0.000708525
1826	0.000704735
2492	0.000702836
1767	0.000688398
926	0.000678664
2444	0.000678575
1774	0.000673824
1958	0.000669892
1550	0.000631839
2421	0.000609892
1437	0.00060181
350	0.000599365
2811	0.000597684
258	0.000594995
921	0.00059172
2566	0.000562046
2404	0.00056144
2594	0.000559802
2440	0.000556308
1974	0.000554885
2465	0.00054231
493	0.000537768
2193	0.000535584
820	0.000525532
588	0.000525267
2434	0.000524621
2431	0.000512883
1255	0.00051167
1967	0.000505863
2411	0.000492007
2389	0.000486843
1040	0.000481682
1822	0.000470218
2163	0.000467868
2651	0.000467507
254	0.000449576
458	0.000442398
404	0.000441399
2842	0.000436406
762	0.000432232
1639	0.000424985
431	0.000415419
301	0.000414527
1312	0.000413118
590	0.000409102
2459	0.000403557
2488	0.000399935
994	0.000394675
2672	0.000392837
1163	0.000392011
1314	0.000386782
2496	0.000385902
752	0.000371578
1630	0.000368732
2838	0.000366488
1438	0.000361183
1827	0.000360542
2780	0.000360338
132	0.000344527
2306	0.000341817
2836	0.000338488
224	0.000337563
885	0.000337112
39	0.000332477
2708	0.00033056
930	0.000329977
2228	0.000328176
2301	0.000321878
352	0.000321092
2801	0.000317264
1777	0.000316313
2281	0.000306353
1578	0.000304997
920	0.000301295
1202	0.000301242
2860	0.000293018
1587	0.000291947
2709	0.000288912
2015	0.000286861
452	0.00028553
2017	0.000263827
1535	0.000261646
298	0.000255857
2583	0.000255833
2605	0.000251406
2711	0.000244248
2260	0.000236772
729	0.000233331
583	0.000232079
2388	0.000230547
2472	0.000229608
343	0.000228899
2778	0.000222106
478	0.000220035
772	0.000219336
2447	0.000217047
2414	0.000215327
966	0.000213953
2427	0.000206731
2580	0.000204969
2862	0.000204591
536	0.000203132
1315	0.000201854
1631	0.000201129
1149	0.000197716
2821	0.000195306
788	0.000193723
2473	0.000192637
2277	0.000192003
2416	0.000188227
2834	0.000177507
2185	0.000172534
2246	0.000171166
464	0.000166282
2670	0.000165119
289	0.000159561
2382	0.000159517
1279	0.000155141
704	0.000154888
2084	0.000154165
2197	0.000151783
2449	0.000149121
795	0.000144688
2276	0.000144113
1595	0.000141898
1577	0.000140124
1467	0.000139082
2165	0.000135627
1319	0.000132016
1289	0.000131793
770	0.000128767
2560	0.000126439
579	0.000124608
140	0.000123332
2234	0.000121461
2463	0.000117996
2499	0.000115983
838	0.000112064
746	0.000111904
429	0.000108952
961	0.000108552
2363	0.000105492
471	0.000105052
2364	0.000103912
156	9.63255e-05
2671	9.59925e-05
2837	9.50587e-05
2595	9.28965e-05
1143	9.08635e-05
915	9.07576e-05
765	9.00292e-05
2428	8.892e-05
1213	8.52931e-05
435	8.37074e-05
760	8.30299e-05
1560	8.10193e-05
2291	8.06356e-05
149	7.67995e-05
2596	7.50126e-05
2441	7.29937e-05
2979	7.26965e-05
2710	7.19453e-05
164	6.96039e-05
595	6.77449e-05
1741	6.71447e-05
437	6.69251e-05
731	6.68148e-05
1557	6.57553e-05
1321	6.5697e-05
176	6.56287e-05
1732	6.46161e-05
1662	6.43606e-05
1322	5.99035e-05
883	5.96845e-05
2266	5.8764e-05
2268	5.85637e-05
2305	5.7697e-05
1382	5.68997e-05
2584	5.65553e-05
229	5.59461e-05
1045	5.5225e-05
2061	5.45461e-05
2322	5.41309e-05
758	5.21487e-05
2462	5.17651e-05
2898	5.15236e-05
2154	5.04619e-05
987	4.9463e-05
1528	4.88754e-05
968	4.74747e-05
1444	4.63016e-05
1594	4.62902e-05
1514	4.52747e-05
351	4.50338e-05
1660	4.36364e-05
88	4.22546e-05
1778	4.12384e-05
2666	4.01662e-05
813	4.00123e-05
2545	3.91456e-05
749	3.70633e-05
245	3.67083e-05
584	3.61558e-05
1385	3.56919e-05
46	3.4661e-05
1084	3.45219e-05
1815	3.40111e-05
460	3.36888e-05
1201	3.32397e-05
2399	3.26676e-05
401	3.22709e-05
2063	3.20196e-05
828	3.18478e-05
2060	3.18433e-05
1818	3.16455e-05
1973	3.12896e-05
1819	3.09897e-05
1953	3.01611e-05
496	2.9952e-05
2354	2.8211e-05
1141	2.81105e-05
2823	2.78346e-05
774	2.76815e-05
2013	2.74732e-05
30	2.74316e-05
2548	2.73842e-05
787	2.728e-05
868	2.72062e-05
2133	2.71513e-05
115	2.68773e-05
525	2.68686e-05
2661	2.60684e-05
1760	2.6045e-05
1398	2.59572e-05
1638	2.59329e-05
2600	2.54625e-05
848	2.495e-05
499	2.49347e-05
396	2.48329e-05
2598	2.47816e-05
31	2.472e-05
1252	2.40103e-05
2254	2.39989e-05
1420	2.31299e-05
433	2.30981e-05
1771	2.29983e-05
2032	2.19565e-05
572	2.1955e-05
2829	2.19367e-05
6	2.18171e-05
240	2.17408e-05
2975	2.16281e-05
2413	2.11067e-05
2398	2.10843e-05
2225	2.09727e-05
1919	2.07379e-05
526	2.05375e-05
2152	2.04015e-05
244	1.9988e-05
1747	1.99534e-05
2319	1.98744e-05
2606	1.98626e-05
678	1.90547e-05
185	1.89269e-05
236	1.88631e-05
1193	1.8776e-05
84	1.87067e-05
2557	1.86742e-05
1754	1.86562e-05
2886	1.86525e-05
2150	1.86445e-05
2217	1.84727e-05
2762	1.80906e-05
363	1.79753e-05
988	1.77644e-05
1593	1.75061e-05
1210	1.75013e-05
2550	1.7368e-05
2353	1.7274e-05
2134	1.7253e-05
28	1.70806e-05
358	1.68694e-05
578	1.6811e-05
602	1.67012e-05
766	1.64036e-05
487	1.63023e-05
2149	1.61406e-05
455	1.60585e-05
2682	1.59807e-05
802	1.57329e-05
2668	1.55866e-05
2633	1.51979e-05
1249	1.4825e-05
2175	1.47246e-05
1744	1.41588e-05
329	1.39994e-05
1447	1.39888e-05
326	1.38811e-05
518	1.34189e-05
2189	1.30705e-05
302	1.30388e-05
1659	1.29151e-05
618	1.28457e-05
193	1.26557e-05
2235	1.26261e-05
688	1.25507e-05
2477	1.25123e-05
138	1.23899e-05
2577	1.23428e-05
2571	1.2059e-05
498	1.2036e-05
1164	1.19169e-05
382	1.19046e-05
107	1.17442e-05
4	1.15671e-05
612	1.1511e-05
1545	1.14351e-05
2534	1.1395e-05
1627	1.12736e-05
2528	1.11014e-05
295	1.09328e-05
217	1.08891e-05
1538	1.05918e-05
2627	1.05526e-05
1751	1.04829e-05
1242	1.03073e-05
2	1.02919e-05
2136	1.0256e-05
2515	1.01151e-05
2233	1.00293e-05
201	9.94535e-06
1574	9.94197e-06
170	9.8711e-06
2038	9.85033e-06
2890	9.81625e-06
1337	9.80337e-06
1850	9.71019e-06
2318	9.70415e-06
529	9.52311e-06
1167	9.43934e-06
1674	9.30303e-06
2524	9.21525e-06
2878	9.1816e-06
790	9.10274e-06
454	8.8659e-06
18	8.83421e-06
847	8.79624e-06
2312	8.61329e-06
2307	8.58089e-06
162	8.57203e-06
2653	8.56536e-06
531	8.5195e-06
929	8.46383e-06
1445	8.39399e-06
5	8.3759e-06
886	8.34582e-06
2310	8.32959e-06
2538	8.32383e-06
516	8.13735e-06
368	8.13657e-06
465	8.01263e-06
37	7.97721e-06
636	7.88512e-06
2626	7.87287e-06
317	7.86502e-06
2407	7.80496e-06
2537	7.78007e-06
2514	7.75544e-06
1966	7.63638e-06
366	7.5411e-06
1839	7.48528e-06
381	7.43614e-06
1968	7.41914e-06
1663	7.38979e-06
2707	7.3733e-06
2067	7.23038e-06
168	7.20602e-06
141	7.14486e-06
1598	7.09263e-06
1562	7.04174e-06
2559	6.98486e-06
1165	6.93766e-06
1921	6.81617e-06
1588	6.75164e-06
939	6.66503e-06
2578	6.63799e-06
1959	6.58594e-06
850	6.56629e-06
637	6.56413e-06
154	6.53235e-06
2502	6.49985e-06
2813	6.45633e-06
390	6.45194e-06
2383	6.42737e-06
2558	6.39819e-06
1758	6.34477e-06
313	6.3335e-06
500	6.18884e-06
360	6.14236e-06
1256	6.11568e-06
340	6.08513e-06
238	6.05917e-06
1	6.02845e-06
2203	5.98208e-06
2604	5.96796e-06
1139	5.87338e-06
676	5.8418e-06
2191	5.82786e-06
161	5.79202e-06
304	5.74674e-06
235	5.74415e-06
2516	5.73078e-06
2315	5.67712e-06
2089	5.67526e-06
1542	5.66318e-06
1681	5.62939e-06
69	5.61294e-06
215	5.59675e-06
1540	5.58373e-06
864	5.57196e-06
2601	5.54723e-06
684	5.5431e-06
1207	5.51127e-06
1798	5.5052e-06
2350	5.36961e-06
305	5.35169e-06
234	5.32244e-06
917	5.31904e-06
2064	5.27769e-06
2896	5.24901e-06
2270	5.14727e-06
2535	5.14023e-06
530	5.03824e-06
113	5.03781e-06
2572	5.00416e-06
2406	4.99292e-06
1658	4.98518e-06
1701	4.92073e-06
2540	4.86187e-06
2130	4.85144e-06
2348	4.83212e-06
345	4.76237e-06
2194	4.75124e-06
898	4.72618e-06
371	4.67268e-06
2482	4.64933e-06
2564	4.64008e-06
1748	4.63857e-06
51	4.61459e-06
1626	4.60427e-06
1397	4.58125e-06
833	4.57682e-06
2205	4.54651e-06
1233	4.53949e-06
1739	4.53584e-06
283	4.53019e-06
2554	4.49654e-06
71	4.44268e-06
239	4.44052e-06
2147	4.42291e-06
941	4.41197e-06
933	4.40965e-06
2556	4.4061e-06
846	4.38862e-06
7	4.35455e-06
495	4.33136e-06
1799	4.3197e-06
1928	4.3066e-06
2521	4.2787e-06
264	4.27311e-06
2815	4.25245e-06
385	4.22988e-06
79	4.22936e-06
2529	4.21105e-06
402	4.1794e-06
361	4.13687e-06
2634	4.12482e-06
1313	4.11747e-06
126	4.11129e-06
1580	4.1083e-06
373	4.08141e-06
809	4.06451e-06
1636	4.05624e-06
139	4.04521e-06
514	4.04123e-06
134	4.02925e-06
70	4.00788e-06
1451	3.97823e-06
2609	3.97647e-06
1124	3.95973e-06
2385	3.94872e-06
1458	3.94789e-06
1296	3.9209e-06
488	3.87961e-06
67	3.87851e-06
2525	3.78161e-06
2589	3.73929e-06
2663	3.72825e-06
1063	3.69643e-06
2763	3.66462e-06
255	3.65602e-06
761	3.60245e-06
2160	3.58841e-06
1029	3.58693e-06
1243	3.58109e-06
81	3.51774e-06
1617	3.49599e-06
1442	3.48683e-06
448	3.46359e-06
181	3.45247e-06
2252	3.41183e-06
248	3.34771e-06
2457	3.33575e-06
918	3.331e-06
2241	3.29183e-06
2793	3.27894e-06
2562	3.2782e-06
1536	3.24402e-06
952	3.23876e-06
1950	3.21926e-06
323	3.21682e-06
2574	3.21482e-06
946	3.21403e-06
1017	3.19566e-06
1657	3.19346e-06
554	3.18701e-06
2148	3.18087e-06
2209	3.14746e-06
1942	3.14041e-06
439	3.13854e-06
635	3.13293e-06
1775	3.13223e-06
1023	3.11498e-06
29	3.09446e-06
1057	3.07729e-06
1673	3.07397e-06
1697	3.0737e-06
2843	3.05532e-06
2508	3.04348e-06
257	3.03633e-06
2575	3.02708e-06
963	3.0097e-06
923	2.98476e-06
884	2.9734e-06
1539	2.96854e-06
1030	2.95268e-06
1831	2.95263e-06
1797	2.95125e-06
1206	2.94662e-06
2324	2.92746e-06
1259	2.90339e-06
2455	2.88385e-06
198	2.8676e-06
840	2.86311e-06
288	2.85354e-06
2555	2.83467e-06
17	2.8316e-06
1769	2.82534e-06
1288	2.77764e-06
1719	2.7555e-06
2498	2.74714e-06
2599	2.74085e-06
342	2.73975e-06
72	2.73962e-06
835	2.70169e-06
1515	2.70139e-06
1809	2.69992e-06
377	2.69531e-06
399	2.68203e-06
160	2.68016e-06
2220	2.67719e-06
1240	2.66709e-06
599	2.65879e-06
233	2.65404e-06
1730	2.60441e-06
964	2.55683e-06
2588	2.53303e-06
585	2.5151e-06
2188	2.5145e-06
405	2.51422e-06
3	2.50741e-06
2491	2.44901e-06
192	2.42208e-06
687	2.41633e-06
1081	2.41265e-06
47	2.41113e-06
823	2.36996e-06
1651	2.3503e-06
63	2.31869e-06
1454	2.29154e-06
919	2.23139e-06
82	2.22535e-06
1248	2.22133e-06
1431	2.19645e-06
2581	2.16737e-06
2475	2.15775e-06
135	2.12296e-06
2039	2.11448e-06
23	2.10388e-06
782	2.09778e-06
2549	2.09385e-06
2437	2.08135e-06
2504	2.07186e-06
2585	2.07152e-06
596	2.06695e-06
2867	2.06062e-06
515	2.05261e-06
2170	2.04791e-06
33	2.03969e-06
2536	2.03736e-06
666	2.0045e-06
551	1.99404e-06
1348	1.99185e-06
1722	1.97686e-06
2359	1.95536e-06
914	1.94719e-06
2230	1.92562e-06
2408	1.92454e-06
1135	1.92077e-06
1736	1.91171e-06
282	1.90424e-06
986	1.89187e-06
1408	1.878e-06
173	1.86897e-06
1257	1.86324e-06
985	1.83603e-06
406	1.8136e-06
2662	1.8136e-06
1640	1.81171e-06
1140	1.79183e-06
387	1.77919e-06
2659	1.77659e-06
450	1.76796e-06
259	1.74773e-06
2442	1.73151e-06
2095	1.71306e-06
386	1.71281e-06
1607	1.7026e-06
2561	1.67216e-06
1613	1.65671e-06
197	1.60865e-06
2313	1.60082e-06
1136	1.59781e-06
2258	1.59206e-06
314	1.58606e-06
2547	1.58464e-06
613	1.57126e-06
1054	1.54146e-06
1316	1.53211e-06
1715	1.52393e-06
2522	1.51461e-06
2539	1.50956e-06
1208	1.50755e-06
247	1.50314e-06
2719	1.48954e-06
2533	1.45969e-06
2503	1.45836e-06
1400	1.45067e-06
2242	1.43984e-06
2458	1.436e-06
505	1.42799e-06
1716	1.42294e-06
2128	1.39919e-06
105	1.39717e-06
1443	1.38858e-06
2565	1.37865e-06
2542	1.35396e-06
2402	1.34926e-06
43	1.34555e-06
195	1.34047e-06
1373	1.31288e-06
1157	1.31154e-06
893	1.31029e-06
1753	1.30098e-06
1463	1.29816e-06
2551	1.2882e-06
2510	1.27711e-06
768	1.25833e-06
470	1.25649e-06
1787	1.2478e-06
1766	1.24732e-06
2527	1.24377e-06
2456	1.23647e-06
1051	1.22662e-06
1723	1.22561e-06
1457	1.21909e-06
354	1.21246e-06
1604	1.20919e-06
158	1.20274e-06
2381	1.19828e-06
2511	1.19774e-06
2316	1.19754e-06
785	1.19324e-06
1492	1.19183e-06
2506	1.18628e-06
2532	1.17808e-06
2882	1.14751e-06
2892	1.14327e-06
187	1.13926e-06
261	1.13534e-06
2171	1.12765e-06
290	1.11982e-06
2251	1.10139e-06
20	1.09493e-06
685	1.06409e-06
216	1.0639e-06
112	1.05399e-06
2563	1.04487e-06
2644	1.04156e-06
1260	1.02039e-06
1087	1.01947e-06
2669	1.01051e-06
347	1.00373e-06
1612	1.00344e-06
293	1.00328e-06
1320	9.93512e-07
159	9.80432e-07
2519	9.7948e-07
394	9.68427e-07
2518	9.57008e-07
2232	9.53544e-07
1933	9.41993e-07
1836	9.31456e-07
1036	9.12431e-07
446	9.11323e-07
1949	9.09455e-07
2582	9.08366e-07
804	9.07517e-07
695	9.06124e-07
125	9.03939e-07
2553	9.00104e-07
2830	8.8309e-07
2509	8.79369e-07
163	8.76666e-07
497	8.7492e-07
2213	8.71857e-07
392	8.64096e-07
2641	8.54304e-07
969	8.50569e-07
2985	8.47959e-07
2248	8.3902e-07
1399	8.37606e-07
1286	8.25431e-07
1597	8.19729e-07
1452	8.08769e-07
1237	7.91627e-07
922	7.89703e-07
1795	7.87656e-07
1714	7.83396e-07
2660	7.70278e-07
2643	7.56758e-07
2289	7.55269e-07
1409	7.42128e-07
262	7.40656e-07
2294	7.34687e-07
553	7.18774e-07
1606	7.13141e-07
292	7.12734e-07
93	7.10671e-07
44	7.02724e-07
2283	6.90193e-07
2530	6.86485e-07
66	6.86126e-07
1448	6.80784e-07
1547	6.79666e-07
2803	6.60285e-07
1945	6.35632e-07
2186	6.30134e-07
571	6.10154e-07
1424	5.96668e-07
2426	5.74627e-07
2085	5.62159e-07
449	5.23752e-07
376	5.09907e-07
2512	5.04374e-07
2879	4.94605e-07
1947	4.82107e-07
2500	4.79814e-07
2218	4.72945e-07
2184	4.72837e-07
143	4.60887e-07
2517	4.58879e-07
781	4.50578e-07
2863	4.47881e-07
1746	4.29064e-07
1710	4.28456e-07
552	4.2503e-07
155	4.2349e-07
1711	4.21326e-07
2543	4.11917e-07
2864	4.09907e-07
1009	4.08152e-07
1368	4.07806e-07
1287	4.07715e-07
1796	3.97201e-07
1742	3.94261e-07
153	3.86889e-07
1946	3.83265e-07
1642	3.8322e-07
136	3.70473e-07
2552	3.69968e-07
2567	3.67485e-07
524	3.65331e-07
294	3.51966e-07
2161	3.47932e-07
2309	3.45951e-07
2489	3.33559e-07
2831	3.31472e-07
1453	3.2691e-07
237	3.12652e-07
357	3.10028e-07
180	3.07693e-07
1698	3.04876e-07
2476	3.03759e-07
1670	2.99684e-07
1720	2.97643e-07
98	2.8048e-07
1952	2.79128e-07
403	2.66806e-07
2409	2.58319e-07
2523	2.47803e-07
544	2.44056e-07
1490	2.40938e-07
2090	2.23593e-07
214	2.06993e-07
2025	0
1901	0
1977	0
1976	0
2097	0
2096	0
1962	0
2098	0
2099	0
1900	0
2046	0
2045	0
2100	0
2101	0
1902	0
2112	0
1978	0
2103	0
2022	0
2047	0
2126	0
2091	0
2028	0
1981	0
1980	0
1979	0
2092	0
1905	0
2121	0
1904	0
2023	0
2093	0
2120	0
2024	0
2094	0
1961	0
1903	0
1899	0
1897	0
1898	0
1970	0
1891	0
2110	0
1890	0
1964	0
2042	0
1889	0
1885	0
1965	0
2127	0
1888	0
2111	0
1886	0
1971	0
2041	0
2114	0
2113	0
2031	0
2040	0
1887	0
2037	0
2117	0
2043	0
1892	0
2109	0
1896	0
1895	0
2026	0
1894	0
1893	0
1969	0
2029	0
2119	0
2104	0
2027	0
2105	0
1884	0
1972	0
1963	0
2048	0
2107	0
2108	0
2118	0
2044	0
2088	0
2052	0
2087	0
2006	0
1935	0
2002	0
2074	0
2003	0
1934	0
1992	0
2004	0
1931	0
2075	0
2005	0
2076	0
2073	0
2008	0
1991	0
1990	0
2036	0
2010	0
2011	0
2077	0
2078	0
2012	0
1989	0
1936	0
2072	0
1929	0
1941	0
2066	0
2034	0
1996	0
1997	0
1944	0
2068	0
2069	0
1943	0
1998	0
1999	0
1940	0
1937	0
1995	0
1939	0
2070	0
2071	0
1994	0
1948	0
2000	0
1938	0
2001	0
1993	0
1988	0
2014	0
2021	0
2080	0
1912	0
2056	0
1911	0
1982	0
2054	0
1910	0
2018	0
2053	0
1960	0
1909	0
1908	0
2016	0
2082	0
2083	0
1907	0
1906	0
2019	0
2051	0
2050	0
2049	0
2086	0
2020	0
1913	0
2057	0
1987	0
2062	0
2033	0
1986	0
1985	0
1926	0
1984	0
1925	0
1924	0
1923	0
1983	0
2079	0
1954	0
1914	0
1955	0
1956	0
1957	0
1922	0
2059	0
2058	0
1918	0
1917	0
1916	0
1915	0
2035	0
2471	0
2129	0
2845	0
2854	0
2853	0
2852	0
2851	0
2850	0
2849	0
2848	0
2847	0
2846	0
2844	0
2856	0
2841	0
2839	0
2835	0
2833	0
2828	0
2827	0
2826	0
2825	0
2824	0
2855	0
2857	0
2131	0
2876	0
2889	0
2888	0
2887	0
2885	0
2884	0
2883	0
2881	0
2880	0
2877	0
2874	0
2858	0
2873	0
2872	0
2871	0
2870	0
2869	0
2868	0
2866	0
2865	0
2859	0
2822	0
2820	0
2819	0
2718	0
2752	0
2751	0
2747	0
2746	0
2742	0
2741	0
2736	0
2731	0
2729	0
2706	0
2818	0
2702	0
2701	0
2700	0
2699	0
2696	0
2695	0
2694	0
2691	0
2686	0
2753	0
2755	0
2765	0
2767	0
2817	0
2816	0
2814	0
2812	0
2810	0
2809	0
2808	0
2804	0
2794	0
2792	0
2791	0
2787	0
2785	0
2782	0
2781	0
2779	0
2776	0
2771	0
2770	0
2891	0
2893	0
2895	0
2959	0
2968	0
2967	0
2966	0
2965	0
2964	0
2963	0
2962	0
2961	0
2960	0
2958	0
2947	0
2957	0
2956	0
2955	0
2954	0
2953	0
2952	0
2951	0
2950	0
2949	0
2969	0
2970	0
2971	0
2972	0
2996	0
2994	0
2993	0
2992	0
2991	0
2990	0
2989	0
2988	0
2986	0
2984	0
2983	0
2982	0
2981	0
2980	0
2978	0
2977	0
2976	0
2974	0
2973	0
2948	0
2946	0
2897	0
2911	0
2921	0
2920	0
2919	0
2918	0
2917	0
2916	0
2915	0
2914	0
2913	0
2909	0
2945	0
2908	0
2906	0
2905	0
2904	0
2903	0
2902	0
2901	0
2900	0
2899	0
2922	0
2923	0
2924	0
2925	0
2944	0
2943	0
2942	0
2941	0
2940	0
2939	0
2938	0
2937	0
2936	0
2935	0
2934	0
2933	0
2932	0
2931	0
2930	0
2929	0
2928	0
2927	0
2926	0
2685	0
2684	0
2683	0
2243	0
2263	0
2261	0
2259	0
2257	0
2255	0
2253	0
2247	0
2245	0
2244	0
2238	0
2215	0
2236	0
2231	0
2229	0
2226	0
2224	0
2223	0
2222	0
2221	0
2219	0
2264	0
2265	0
2267	0
2269	0
2321	0
2320	0
2304	0
2303	0
2302	0
2299	0
2298	0
2297	0
2296	0
2295	0
2293	0
2292	0
2285	0
2284	0
2282	0
2275	0
2274	0
2273	0
2271	0
2216	0
2214	0
2325	0
2145	0
2168	0
2164	0
2162	0
2159	0
2158	0
2155	0
2153	0
2151	0
2146	0
2144	0
2212	0
2143	0
2142	0
2141	0
2140	0
2139	0
2138	0
2137	0
2135	0
2132	0
2169	0
2173	0
2174	0
2176	0
2211	0
2207	0
2206	0
2204	0
2202	0
2201	0
2200	0
2199	0
2198	0
2196	0
2192	0
2190	0
2187	0
2183	0
2182	0
2180	0
2179	0
2178	0
2177	0
2323	0
2326	0
2681	0
2607	0
2638	0
2637	0
2636	0
2616	0
2615	0
2614	0
2611	0
2610	0
2608	0
2602	0
2501	0
2586	0
2579	0
2573	0
2570	0
2569	0
2546	0
2541	0
2526	0
2507	0
2640	0
2642	0
2645	0
2646	0
2680	0
2679	0
2678	0
2677	0
2676	0
2675	0
2674	0
2665	0
2664	0
2658	0
2657	0
2656	0
2655	0
2654	0
2652	0
2650	0
2649	0
2648	0
2647	0
2505	0
1882	0
2327	0
2338	0
2347	0
2346	0
2345	0
2344	0
2343	0
2342	0
2341	0
2340	0
2339	0
2337	0
2468	0
2336	0
2335	0
2334	0
2333	0
2332	0
2331	0
2330	0
2329	0
2328	0
2349	0
2355	0
2356	0
2357	0
2438	0
2401	0
2386	0
2384	0
2380	0
2379	0
2377	0
2375	0
2374	0
2373	0
2372	0
2370	0
2369	0
2368	0
2366	0
2365	0
2362	0
2361	0
2360	0
1883	0
1533	0
1881	0
866	0
889	0
888	0
887	0
882	0
881	0
880	0
879	0
878	0
877	0
876	0
875	0
870	0
867	0
863	0
836	0
862	0
861	0
860	0
859	0
858	0
857	0
856	0
854	0
853	0
852	0
851	0
845	0
843	0
890	0
891	0
892	0
894	0
942	0
938	0
937	0
936	0
935	0
934	0
932	0
931	0
928	0
925	0
924	0
916	0
912	0
911	0
910	0
909	0
908	0
907	0
906	0
905	0
903	0
902	0
900	0
899	0
897	0
896	0
895	0
842	0
825	0
1880	0
593	0
614	0
610	0
609	0
608	0
607	0
606	0
605	0
604	0
603	0
601	0
600	0
597	0
594	0
592	0
814	0
591	0
589	0
587	0
586	0
582	0
581	0
577	0
576	0
575	0
574	0
573	0
570	0
569	0
615	0
616	0
617	0
619	0
797	0
792	0
789	0
757	0
753	0
706	0
701	0
697	0
694	0
690	0
639	0
638	0
634	0
633	0
632	0
631	0
630	0
629	0
628	0
627	0
626	0
625	0
624	0
623	0
622	0
621	0
620	0
943	0
944	0
945	0
1048	0
1066	0
1065	0
1064	0
1062	0
1061	0
1060	0
1059	0
1058	0
1056	0
1055	0
1052	0
1050	0
1049	0
1047	0
947	0
1046	0
1044	0
1043	0
1042	0
1041	0
1039	0
1038	0
1037	0
1035	0
1034	0
1033	0
1032	0
1028	0
1067	0
1068	0
1069	0
1070	0
1100	0
1099	0
1098	0
1097	0
1096	0
1095	0
1094	0
1093	0
1092	0
1091	0
1090	0
1089	0
1088	0
1086	0
1085	0
1083	0
1082	0
1080	0
1079	0
1078	0
1077	0
1076	0
1075	0
1074	0
1073	0
1072	0
1071	0
1027	0
1026	0
1022	0
984	0
982	0
981	0
980	0
979	0
978	0
977	0
976	0
975	0
974	0
973	0
972	0
971	0
970	0
967	0
965	0
962	0
959	0
958	0
957	0
956	0
955	0
954	0
953	0
951	0
950	0
949	0
948	0
983	0
989	0
1021	0
990	0
1020	0
1019	0
1018	0
1016	0
1015	0
1014	0
1013	0
1012	0
1011	0
1010	0
1008	0
1007	0
1006	0
1005	0
1004	0
1003	0
1002	0
1001	0
1000	0
999	0
998	0
997	0
996	0
995	0
993	0
992	0
991	0
568	0
567	0
566	0
202	0
221	0
220	0
219	0
218	0
212	0
211	0
210	0
209	0
208	0
207	0
205	0
204	0
203	0
199	0
297	0
189	0
188	0
186	0
184	0
183	0
182	0
179	0
177	0
175	0
174	0
172	0
171	0
167	0
222	0
225	0
226	0
227	0
291	0
287	0
286	0
285	0
284	0
281	0
280	0
279	0
278	0
277	0
276	0
275	0
274	0
273	0
272	0
271	0
270	0
269	0
268	0
267	0
266	0
265	0
260	0
246	0
231	0
230	0
228	0
166	0
165	0
148	0
74	0
65	0
64	0
62	0
61	0
60	0
59	0
58	0
57	0
56	0
55	0
54	0
53	0
52	0
50	0
49	0
48	0
42	0
38	0
36	0
35	0
34	0
27	0
26	0
25	0
24	0
22	0
19	0
[truncated: 657 more rows]

## Sheet: SHAP_Endotype_B
GEM Reaction index	SHAP mean
2444	0.566299
2467	0.548205
2436	0.527998
480	0.520433
200	0.492485
2305	0.329543
1130	0.307102
2419	0.303638
462	0.284721
2474	0.267221
2497	0.259871
1665	0.236863
2404	0.219262
1534	0.219007
1782	0.214843
1163	0.2141
2544	0.209162
1319	0.185621
1826	0.17386
2584	0.137693
1577	0.133254
344	0.132629
534	0.117951
1958	0.117831
258	0.108646
2423	0.106257
2397	0.102987
2496	0.102245
598	0.0960476
2393	0.0898908
2450	0.0847587
2382	0.0750426
2651	0.0746392
1322	0.0745117
2479	0.072035
1467	0.068027
1630	0.0643783
2007	0.0630521
2055	0.059166
1683	0.05895
1662	0.0559949
41	0.0554565
2387	0.0542269
2484	0.0535601
2371	0.0529812
2249	0.0520965
460	0.0508161
2454	0.0505582
1571	0.0468233
2280	0.0461017
1189	0.0445808
2449	0.0436261
2422	0.0435298
89	0.0433558
1541	0.0405885
2286	0.0405646
85	0.0403288
2433	0.0399772
2306	0.0387587
2276	0.0378446
1298	0.037363
994	0.0367944
1202	0.034917
921	0.0345128
2545	0.0289095
2447	0.0285219
454	0.0282517
156	0.0263981
83	0.0258834
2464	0.0221054
2603	0.0218485
1557	0.0213789
2780	0.0210055
1824	0.019544
2391	0.0190544
1299	0.0188325
2472	0.0187602
2277	0.018715
16	0.0179408
960	0.0176389
2388	0.0167886
84	0.0165322
2451	0.0162474
2486	0.0151001
2568	0.0147376
2481	0.0145454
2427	0.0141831
2439	0.0139012
1315	0.0118667
1535	0.0116451
535	0.011636
2235	0.0115925
865	0.0109786
300	0.0102258
2412	0.0100536
2317	0.0100144
151	0.00981552
256	0.00939086
253	0.00930617
2424	0.00884316
1822	0.00851845
1537	0.00800828
2418	0.00783318
2453	0.00770106
2485	0.00768703
2421	0.00767368
2460	0.00749749
2488	0.00734564
2490	0.00731624
2167	0.00730909
2060	0.00711608
2193	0.00701445
1825	0.00701059
2278	0.00691209
1386	0.00672235
2116	0.00659828
1314	0.00651549
1616	0.00640152
2469	0.00622644
2417	0.00619594
2363	0.00594181
1927	0.00592591
2499	0.00569053
1524	0.00568378
2428	0.00555572
2448	0.0054448
2432	0.00529694
378	0.00470387
2015	0.00468475
1255	0.00464849
2354	0.00456896
580	0.00455293
2290	0.00453347
194	0.00449246
770	0.00439925
2425	0.00415746
1578	0.00409097
416	0.00398989
131	0.00397359
2250	0.00389451
2279	0.00385818
536	0.00385535
306	0.00383855
2566	0.00381307
2272	0.00369631
961	0.00366838
1781	0.00337058
250	0.00332294
150	0.00327843
2730	0.00327796
2395	0.00327734
2441	0.00301265
1734	0.00299532
2240	0.00296355
1594	0.00293049
2416	0.00287114
1438	0.002859
383	0.00278463
404	0.00265037
2470	0.00252333
849	0.00252217
595	0.00251642
75	0.00249964
301	0.00244133
1437	0.00243861
920	0.00237674
2465	0.00229875
2802	0.00224588
1767	0.00223263
315	0.0022243
466	0.00221867
107	0.00221136
926	0.00219757
806	0.00219602
2314	0.00216533
2319	0.00204993
2478	0.00202524
1528	0.00199916
2430	0.00197323
1747	0.00195098
1250	0.00187382
940	0.00186347
1639	0.00183818
1930	0.00183375
1234	0.00182986
2084	0.00177923
45	0.00175779
414	0.00172068
157	0.001681
1638	0.00167336
1053	0.00164493
2288	0.00164019
2493	0.00161343
2442	0.00161285
2744	0.00160461
2860	0.00157291
2300	0.00154349
2778	0.00146818
2115	0.0014581
1975	0.00144442
2429	0.00141714
1160	0.00138594
2443	0.00133688
2583	0.00132377
529	0.00131471
2308	0.00121826
2106	0.00121665
2446	0.00121341
2394	0.00120978
1185	0.00120297
2459	0.0011979
2466	0.00115401
2322	0.00114841
1777	0.00114612
1951	0.00109284
196	0.00103703
2487	0.00101963
755	0.00101847
927	0.00101588
2414	0.00100884
2770	0.000987144
2396	0.000948219
1827	0.000929063
2281	0.000913703
2081	0.00089733
1559	0.000867535
2580	0.000848196
2492	0.000841637
1201	0.000831485
352	0.000764132
2431	0.00073901
2461	0.000724716
2166	0.000670383
2434	0.000651201
1553	0.000645021
2061	0.000624812
479	0.000605076
2593	0.000591641
2195	0.000587504
263	0.000570112
1712	0.000568561
447	0.000542423
2403	0.000535477
76	0.000528932
2494	0.000526428
1318	0.00052117
106	0.000519329
2832	0.000513356
1149	0.000509862
2452	0.000503605
426	0.000496118
2065	0.000491255
1764	0.000482242
2738	0.000480071
152	0.000479849
844	0.000454059
2673	0.000449738
2410	0.000443555
1778	0.000417525
588	0.000406123
87	0.000405197
1595	0.000403847
2576	0.000399413
1816	0.000390106
2480	0.000373668
1565	0.000373043
1143	0.000369836
2483	0.00036236
2378	0.000356221
2836	0.000353883
1421	0.000350648
2531	0.00034704
2463	0.00034459
458	0.000342917
2413	0.000338135
590	0.000329166
2762	0.000314289
1554	0.000287114
2415	0.000284222
2163	0.000277927
2592	0.000269519
1974	0.000268054
1556	0.000259479
223	0.000258451
1211	0.000254029
2399	0.00025292
2392	0.000247135
379	0.000245403
316	0.000244966
1040	0.000244919
298	0.000242038
2862	0.000235683
2473	0.000226118
2894	0.000225784
350	0.000221292
2411	0.000213493
2838	0.000208056
2445	0.00020591
611	0.000205849
2595	0.000196633
2420	0.000195917
478	0.000190564
2462	0.000188565
343	0.000188263
2227	0.000179945
96	0.00017322
224	0.000167366
2667	0.000156228
2311	0.000149279
2102	0.000147159
2440	0.000146332
886	0.000146254
730	0.000146204
2495	0.000145139
2811	0.000141038
1419	0.000140152
471	0.000134109
2551	0.000129261
1733	0.000128788
2152	0.000125937
108	0.000122823
364	0.000120105
2670	0.000119638
2801	0.000116532
2301	0.000115899
2210	0.000111971
289	0.000111021
2805	0.000109665
1334	0.00010844
2266	0.0001072
368	0.000103728
457	0.000103668
2239	0.000100476
1416	9.85173e-05
1574	9.75675e-05
1233	9.22438e-05
114	9.06643e-05
130	8.75157e-05
1538	8.58068e-05
311	8.54511e-05
1338	8.36709e-05
1757	7.94099e-05
2861	7.84045e-05
1741	7.782e-05
2017	7.65384e-05
415	7.41394e-05
988	7.37276e-05
2364	7.32386e-05
1213	7.20961e-05
2594	6.7672e-05
1812	6.68657e-05
939	6.65938e-05
88	6.53789e-05
493	6.50072e-05
365	6.39887e-05
2150	6.39322e-05
2389	6.31967e-05
1141	6.2963e-05
375	6.11677e-05
2542	5.9888e-05
2197	5.87994e-05
2522	5.83931e-05
1321	5.75028e-05
2225	5.63938e-05
1823	5.37255e-05
1661	5.28395e-05
86	5.20849e-05
1161	5.10958e-05
2898	4.9269e-05
1819	4.8903e-05
583	4.88945e-05
1973	4.85012e-05
2504	4.83419e-05
191	4.38446e-05
2185	4.0826e-05
2390	4.04899e-05
1124	4.04698e-05
765	4.04675e-05
1732	3.92981e-05
360	3.92227e-05
2194	3.69728e-05
464	3.57707e-05
232	3.57315e-05
140	3.56209e-05
2672	3.55965e-05
1818	3.51146e-05
2406	3.50335e-05
141	3.42496e-05
2291	3.40157e-05
2191	3.34633e-05
1920	3.34552e-05
1668	3.26158e-05
1636	3.20408e-05
746	3.18851e-05
2228	3.18423e-05
2149	3.16501e-05
236	3.08681e-05
2270	3.0745e-05
1579	3.07232e-05
4	3.06914e-05
2886	3.00646e-05
1466	2.88319e-05
731	2.88174e-05
1279	2.85064e-05
2605	2.74917e-05
2030	2.69472e-05
1663	2.64462e-05
361	2.63899e-05
1967	2.54892e-05
2500	2.49998e-05
1460	2.46961e-05
122	2.39706e-05
2590	2.38358e-05
2671	2.30678e-05
251	2.28872e-05
473	2.2262e-05
2837	2.20271e-05
1632	2.17261e-05
1560	2.14515e-05
2353	2.0877e-05
2842	2.04518e-05
518	1.97258e-05
885	1.95534e-05
966	1.95459e-05
2165	1.92322e-05
465	1.83316e-05
71	1.81394e-05
2547	1.79002e-05
1309	1.75953e-05
1688	1.67354e-05
475	1.67174e-05
2767	1.67149e-05
2508	1.66283e-05
363	1.66036e-05
1382	1.65943e-05
2350	1.64608e-05
710	1.59679e-05
963	1.5854e-05
307	1.50463e-05
248	1.48773e-05
918	1.48013e-05
351	1.47705e-05
217	1.46193e-05
2882	1.46041e-05
681	1.4438e-05
2512	1.43153e-05
1199	1.41779e-05
487	1.41098e-05
1231	1.39581e-05
1207	1.38712e-05
2609	1.36012e-05
782	1.33645e-05
2400	1.31719e-05
46	1.31128e-05
135	1.29118e-05
2606	1.24866e-05
500	1.24393e-05
2515	1.23839e-05
1297	1.23408e-05
1492	1.23276e-05
2589	1.19474e-05
2260	1.14815e-05
1536	1.11451e-05
1815	1.09299e-05
2482	1.06346e-05
2170	1.04441e-05
2581	1.03951e-05
262	1.03326e-05
2829	1.03304e-05
688	1.02926e-05
1719	1.00654e-05
1771	1.00642e-05
2309	9.70751e-06
1754	9.61747e-06
572	9.46777e-06
1442	9.30074e-06
1445	9.22992e-06
2212	9.10302e-06
1513	8.99451e-06
1966	8.73197e-06
1023	8.71748e-06
1	8.65507e-06
2840	8.55954e-06
164	8.52293e-06
684	8.50227e-06
768	8.37888e-06
1200	8.2155e-06
637	8.20968e-06
1293	8.19874e-06
1243	7.92599e-06
985	7.89107e-06
2587	7.78178e-06
2175	7.67646e-06
1164	7.58778e-06
138	7.55053e-06
1673	7.43654e-06
1660	7.40389e-06
525	7.3564e-06
930	7.25605e-06
158	7.21669e-06
868	7.11287e-06
314	7.02003e-06
1431	6.96095e-06
2573	6.93481e-06
1933	6.88809e-06
2546	6.84456e-06
33	6.83163e-06
1385	6.77234e-06
847	6.73756e-06
497	6.7061e-06
898	6.53442e-06
2032	6.52826e-06
1748	6.44355e-06
1259	6.38446e-06
2251	6.38284e-06
946	6.31218e-06
1921	6.26708e-06
1588	6.23612e-06
1799	6.23039e-06
170	6.20459e-06
1084	6.16248e-06
596	6.08617e-06
2213	6.05822e-06
2682	6.05542e-06
1711	6.04338e-06
796	6.03741e-06
329	5.86432e-06
828	5.75324e-06
883	5.71276e-06
213	5.70254e-06
1463	5.69235e-06
2626	5.6677e-06
2506	5.61733e-06
1242	5.53126e-06
423	5.49095e-06
31	5.43226e-06
1473	5.40886e-06
1193	5.39229e-06
2381	5.36489e-06
229	5.36156e-06
155	5.33714e-06
70	5.28115e-06
347	5.27517e-06
2221	5.11222e-06
2038	5.05734e-06
1612	5.03344e-06
124	4.96723e-06
1157	4.83652e-06
2064	4.75947e-06
881	4.74813e-06
2536	4.7411e-06
2538	4.72435e-06
134	4.70081e-06
602	4.6927e-06
139	4.65724e-06
2582	4.64314e-06
1249	4.62453e-06
162	4.55062e-06
2241	4.54566e-06
1658	4.53564e-06
1539	4.52338e-06
613	4.28316e-06
1454	4.18505e-06
2771	4.18087e-06
3	4.15312e-06
72	4.13077e-06
17	4.0337e-06
63	4.0267e-06
2377	3.998e-06
143	3.97218e-06
2	3.95732e-06
766	3.9512e-06
1593	3.9381e-06
448	3.83676e-06
2530	3.80986e-06
1237	3.78361e-06
396	3.78021e-06
233	3.68334e-06
2554	3.6772e-06
345	3.66866e-06
2258	3.64493e-06
2572	3.61398e-06
835	3.57543e-06
2426	3.55413e-06
288	3.49899e-06
1609	3.49486e-06
126	3.44063e-06
2823	3.43918e-06
1452	3.43554e-06
1260	3.29721e-06
1542	3.29287e-06
1398	3.26282e-06
398	3.23771e-06
923	3.23644e-06
2659	3.20694e-06
823	3.20349e-06
37	3.17634e-06
201	3.17466e-06
340	3.1684e-06
676	3.16103e-06
154	3.13832e-06
2879	3.10619e-06
2437	3.04536e-06
1284	3.04218e-06
18	2.98973e-06
2189	2.95565e-06
1409	2.94928e-06
2663	2.92187e-06
192	2.88928e-06
112	2.87634e-06
302	2.82284e-06
44	2.80361e-06
571	2.80173e-06
185	2.79519e-06
2539	2.74998e-06
2668	2.74911e-06
2533	2.73206e-06
69	2.70983e-06
1923	2.69177e-06
2548	2.6834e-06
1775	2.62678e-06
145	2.61297e-06
1451	2.59713e-06
917	2.56831e-06
66	2.5503e-06
2408	2.46524e-06
1640	2.44531e-06
941	2.40978e-06
1123	2.40195e-06
2975	2.39596e-06
1337	2.39495e-06
1716	2.38959e-06
1797	2.38467e-06
1607	2.37648e-06
1087	2.37017e-06
129	2.35265e-06
295	2.34785e-06
2694	2.34552e-06
1604	2.3224e-06
163	2.29647e-06
382	2.2507e-06
1082	2.20229e-06
1681	2.16239e-06
2133	2.10175e-06
790	2.0928e-06
2653	2.0874e-06
2561	2.0733e-06
2505	2.04728e-06
2550	2.02039e-06
283	2.00924e-06
2517	1.98329e-06
2596	1.951e-06
2552	1.94702e-06
2557	1.94093e-06
2588	1.91343e-06
1562	1.89068e-06
177	1.88995e-06
531	1.88127e-06
2560	1.86637e-06
2359	1.85845e-06
371	1.84945e-06
294	1.84589e-06
1525	1.84144e-06
1158	1.82043e-06
1774	1.8178e-06
2384	1.8018e-06
7	1.79575e-06
2154	1.76866e-06
2501	1.73626e-06
1320	1.73543e-06
850	1.72837e-06
1587	1.7184e-06
2574	1.71044e-06
1651	1.70704e-06
488	1.68766e-06
1045	1.68583e-06
1210	1.65988e-06
2218	1.63247e-06
1312	1.62426e-06
893	1.62282e-06
1444	1.62156e-06
499	1.60663e-06
1831	1.60176e-06
2160	1.59548e-06
93	1.59529e-06
1613	1.58915e-06
239	1.57682e-06
2769	1.57581e-06
2130	1.56872e-06
2600	1.56098e-06
2407	1.54299e-06
193	1.53323e-06
2183	1.53073e-06
1457	1.52896e-06
1257	1.50051e-06
610	1.48741e-06
1617	1.47781e-06
2067	1.47115e-06
802	1.46838e-06
914	1.46772e-06
804	1.45657e-06
2666	1.45646e-06
290	1.4411e-06
2575	1.44063e-06
1057	1.41954e-06
1420	1.41133e-06
2863	1.4107e-06
2230	1.39715e-06
761	1.38722e-06
2056	1.37319e-06
1550	1.37099e-06
1051	1.36841e-06
2324	1.35925e-06
29	1.35762e-06
169	1.34727e-06
2246	1.34606e-06
969	1.332e-06
1919	1.33135e-06
1795	1.31199e-06
2510	1.30828e-06
1697	1.30482e-06
439	1.29606e-06
584	1.2957e-06
136	1.28957e-06
2719	1.27181e-06
2585	1.26153e-06
153	1.26006e-06
2599	1.25105e-06
28	1.24933e-06
1547	1.23332e-06
79	1.2259e-06
195	1.22007e-06
1698	1.21891e-06
1798	1.20722e-06
450	1.19761e-06
2507	1.17968e-06
2516	1.173e-06
636	1.17218e-06
2518	1.17184e-06
2831	1.15727e-06
1054	1.15222e-06
2383	1.14537e-06
417	1.12669e-06
455	1.11586e-06
313	1.10724e-06
848	1.10647e-06
585	1.1036e-06
2608	1.10217e-06
354	1.09746e-06
47	1.09309e-06
952	1.08326e-06
1809	1.05688e-06
2100	1.04946e-06
2456	1.0457e-06
1953	1.04331e-06
505	1.04016e-06
30	1.03399e-06
2186	1.03319e-06
323	1.02989e-06
2316	1.00078e-06
1030	9.97487e-07
385	9.91632e-07
180	9.81507e-07
1489	9.67316e-07
2660	9.56944e-07
1289	9.52484e-07
2471	9.46738e-07
1739	9.43939e-07
446	9.38333e-07
326	9.26116e-07
98	9.25687e-07
67	9.24917e-07
1081	9.05043e-07
1766	9.02982e-07
686	8.92774e-07
2521	8.88605e-07
82	8.8706e-07
2147	8.71575e-07
1240	8.61729e-07
524	8.5404e-07
1135	8.52625e-07
1458	8.47824e-07
2644	8.47462e-07
264	8.47108e-07
388	8.44025e-07
2830	8.41658e-07
2553	8.40557e-07
1424	8.39415e-07
2562	8.37804e-07
125	8.15156e-07
2294	7.99041e-07
1286	7.95479e-07
1952	7.91052e-07
1408	7.89151e-07
2541	7.70416e-07
176	7.58137e-07
1769	7.48928e-07
2380	7.39356e-07
515	7.1789e-07
1136	7.05655e-07
2315	7.00189e-07
257	6.91275e-07
1208	6.90634e-07
132	6.90581e-07
377	6.89599e-07
293	6.87118e-07
516	6.8631e-07
449	6.73621e-07
402	6.72352e-07
6	6.70938e-07
2476	6.63821e-07
2318	6.60053e-07
1256	6.57985e-07
43	6.42451e-07
785	6.41164e-07
373	6.32268e-07
919	6.27896e-07
2527	6.26827e-07
2641	6.21762e-07
198	6.14646e-07
526	5.96527e-07
249	5.964e-07
1758	5.81699e-07
968	5.67212e-07
235	5.67107e-07
2458	5.64234e-07
695	5.49795e-07
2205	5.46251e-07
115	5.44436e-07
23	5.44095e-07
2509	5.40043e-07
244	5.35208e-07
2386	5.33281e-07
381	5.19077e-07
1063	5.1797e-07
1007	5.08063e-07
884	5.03011e-07
2633	5.00433e-07
2502	4.9937e-07
160	4.96514e-07
1836	4.94376e-07
2747	4.90993e-07
1447	4.89477e-07
1206	4.89338e-07
1627	4.87777e-07
2524	4.78179e-07
168	4.69564e-07
752	4.64244e-07
247	4.63798e-07
32	4.60645e-07
2252	4.54254e-07
376	4.49501e-07
678	4.48615e-07
1684	4.46103e-07
1742	4.41055e-07
2313	4.39597e-07
989	4.39283e-07
1140	4.29615e-07
2537	4.2909e-07
187	4.24211e-07
2128	4.16014e-07
2248	4.15958e-07
1942	4.05524e-07
2859	4.02897e-07
2503	3.97859e-07
181	3.95115e-07
1167	3.80117e-07
2570	3.57382e-07
1399	3.55438e-07
986	3.48721e-07
2519	3.45778e-07
2475	3.45776e-07
214	3.43987e-07
2468	3.34944e-07
2543	3.34061e-07
317	3.33181e-07
2232	3.2729e-07
1515	3.22406e-07
113	3.20938e-07
2563	3.13576e-07
1959	3.11435e-07
20	3.06575e-07
685	3.04927e-07
1723	3.04307e-07
304	3.00815e-07
2815	2.96968e-07
2398	2.9558e-07
498	2.91007e-07
864	2.83889e-07
551	2.7151e-07
2556	2.53033e-07
599	2.52082e-07
2498	2.22138e-07
216	2.15405e-07
292	2.04636e-07
875	1.82852e-07
2268	1.78294e-07
2004	0
2003	0
2002	0
2006	0
1858	0
2949	0
2001	0
2008	0
2000	0
2010	0
1999	0
1828	0
2011	0
1829	0
2005	0
2013	0
2012	0
2946	0
2024	0
2023	0
2022	0
1869	0
2993	0
2021	0
2020	0
2019	0
1998	0
2018	0
2947	0
1870	0
2016	0
2948	0
2014	0
1871	0
2950	0
1910	0
1830	0
1835	0
1985	0
1984	0
2604	0
2953	0
1834	0
2650	0
2954	0
1875	0
1872	0
2955	0
2956	0
2669	0
1876	0
1983	0
1877	0
2983	0
1986	0
1987	0
2952	0
1988	0
1997	0
2025	0
1995	0
1832	0
2984	0
1994	0
1873	0
1874	0
1993	0
1992	0
1991	0
1990	0
2951	0
1833	0
1989	0
1996	0
2029	0
2026	0
2942	0
2939	0
2598	0
2059	0
2058	0
2057	0
2940	0
2941	0
2054	0
2049	0
2053	0
2943	0
2052	0
2996	0
2664	0
2051	0
1859	0
2938	0
2062	0
2063	0
2674	0
2074	0
2073	0
2072	0
2071	0
2070	0
2069	0
2676	0
1861	0
2068	0
1814	0
2675	0
2986	0
2066	0
2985	0
2937	0
2050	0
2048	0
2027	0
2033	0
2601	0
2037	0
2602	0
2036	0
2657	0
2035	0
2034	0
2662	0
1817	0
2031	0
1868	0
2945	0
2656	0
2607	0
2028	0
2994	0
2039	0
2040	0
2944	0
2041	0
1862	0
1863	0
2047	0
1864	0
2046	0
2045	0
1865	0
1820	0
1866	0
2044	0
1867	0
2043	0
1821	0
2658	0
2042	0
2992	0
2991	0
1982	0
1931	0
1896	0
2677	0
1847	0
1934	0
2638	0
2971	0
1897	0
2972	0
1936	0
2973	0
2982	0
1929	0
2974	0
1898	0
1899	0
1928	0
1935	0
1853	0
2976	0
1845	0
1945	0
2634	0
1944	0
2636	0
2637	0
1844	0
2970	0
1894	0
1937	0
1846	0
1943	0
1895	0
1941	0
1940	0
1939	0
1938	0
2640	0
1900	0
1911	0
2981	0
1908	0
2645	0
2647	0
1916	0
2646	0
2979	0
2980	0
1915	0
1918	0
1909	0
1914	0
1913	0
1851	0
1912	0
1852	0
2652	0
1917	0
1907	0
1901	0
2648	0
2977	0
1926	0
1925	0
1924	0
2642	0
2643	0
1848	0
1922	0
1906	0
1902	0
2978	0
1903	0
1849	0
1904	0
1850	0
1905	0
1946	0
1854	0
1947	0
1971	0
2961	0
2962	0
2963	0
2964	0
2989	0
1972	0
1883	0
1970	0
1976	0
1969	0
1884	0
1838	0
1968	0
1885	0
1886	0
2665	0
1882	0
2990	0
1948	0
2958	0
1981	0
2649	0
1857	0
1837	0
1980	0
1979	0
2957	0
1978	0
2960	0
2988	0
1878	0
1879	0
1880	0
2959	0
1977	0
1881	0
1887	0
2610	0
2655	0
2627	0
2615	0
2616	0
1957	0
1956	0
1842	0
1955	0
1954	0
2967	0
1888	0
2968	0
1843	0
1892	0
2969	0
1950	0
1893	0
1949	0
1855	0
2614	0
1891	0
1960	0
2654	0
1860	0
1965	0
1889	0
1839	0
2611	0
2965	0
2966	0
1890	0
1964	0
1841	0
1963	0
1962	0
1856	0
1961	0
2742	0
2145	0
2075	0
2342	0
2877	0
2878	0
2349	0
2348	0
2347	0
2346	0
2345	0
2344	0
2343	0
2341	0
2356	0
2340	0
2339	0
2338	0
2337	0
2336	0
2335	0
2334	0
2333	0
2332	0
2355	0
2357	0
2710	0
2370	0
2379	0
2872	0
2709	0
2375	0
2374	0
2373	0
2873	0
2372	0
2874	0
2369	0
2540	0
2708	0
2368	0
2366	0
2365	0
2875	0
2362	0
2876	0
2361	0
2360	0
2707	0
2331	0
2330	0
2891	0
2293	0
2292	0
2887	0
2888	0
2289	0
2889	0
2890	0
2285	0
2284	0
2283	0
2329	0
2892	0
2282	0
2893	0
2895	0
2896	0
2897	0
2275	0
2274	0
2273	0
2295	0
2296	0
2297	0
2298	0
2328	0
2327	0
2326	0
2325	0
2323	0
2321	0
2320	0
2880	0
2312	0
2881	0
2310	0
2307	0
2883	0
2884	0
2304	0
2303	0
2302	0
2885	0
2299	0
2871	0
2385	0
2076	0
2813	0
2793	0
2794	0
2803	0
2804	0
2807	0
2808	0
2809	0
2810	0
2812	0
2814	0
2729	0
2457	0
2816	0
2455	0
2817	0
2818	0
2819	0
2820	0
2821	0
2822	0
2477	0
2792	0
2870	0
2491	0
2746	0
2741	0
2751	0
2752	0
2753	0
2755	0
2511	0
2763	0
2765	0
2736	0
2731	0
2489	0
2776	0
2779	0
2781	0
2782	0
2785	0
2514	0
2787	0
2791	0
2523	0
2824	0
2525	0
2401	0
2711	0
2532	0
2852	0
2409	0
2534	0
2535	0
2853	0
2854	0
2402	0
2855	0
2825	0
2856	0
2857	0
2858	0
2864	0
2865	0
2866	0
2867	0
2868	0
2869	0
2851	0
2850	0
2849	0
2848	0
2826	0
2526	0
2827	0
2828	0
2833	0
2438	0
2834	0
2835	0
2528	0
2839	0
2529	0
2841	0
2843	0
2844	0
2718	0
2845	0
2846	0
1813	0
2847	0
2899	0
2706	0
2702	0
2140	0
2932	0
2148	0
2146	0
2144	0
2143	0
2683	0
2142	0
2141	0
2586	0
2139	0
2684	0
2138	0
2137	0
2136	0
2135	0
2134	0
2681	0
2132	0
2131	0
2129	0
2151	0
2153	0
2271	0
2161	0
2926	0
2927	0
2571	0
2169	0
2168	0
2691	0
2928	0
2164	0
2162	0
2929	0
2931	0
2159	0
2158	0
2577	0
2578	0
2155	0
2579	0
2686	0
2685	0
2930	0
2127	0
2126	0
2121	0
2086	0
2094	0
2093	0
2679	0
2092	0
2091	0
2090	0
2089	0
2088	0
2087	0
2085	0
2120	0
2935	0
2083	0
2082	0
2678	0
2936	0
2080	0
2079	0
2078	0
2077	0
2095	0
2096	0
2097	0
2098	0
2119	0
2118	0
2117	0
2933	0
2114	0
2113	0
2112	0
2111	0
2110	0
2109	0
2108	0
2107	0
2680	0
2105	0
2104	0
2103	0
2934	0
2101	0
2099	0
2925	0
2171	0
2173	0
2914	0
2247	0
2245	0
2244	0
2243	0
2242	0
2699	0
2911	0
2238	0
2913	0
2236	0
2223	0
2915	0
2234	0
2233	0
2231	0
2229	0
2696	0
2916	0
2226	0
2917	0
2909	0
2700	0
2908	0
2906	0
2900	0
2901	0
2902	0
2701	0
2903	0
2269	0
2267	0
2904	0
2265	0
2264	0
2263	0
2261	0
2905	0
2259	0
2257	0
2255	0
2254	0
2253	0
2549	0
2224	0
2222	0
2174	0
2188	0
2921	0
2196	0
2922	0
2923	0
2924	0
2192	0
2565	0
2190	0
2695	0
2187	0
2220	0
2184	0
2182	0
2180	0
2567	0
2179	0
2178	0
2177	0
2176	0
2569	0
2198	0
2199	0
2200	0
2201	0
2219	0
2918	0
2217	0
2216	0
2555	0
2215	0
2214	0
2558	0
2919	0
2211	0
2559	0
2209	0
2207	0
2206	0
2204	0
2203	0
2920	0
2202	0
2564	0
2661	0
1533	0
1811	0
666	0
759	0
758	0
757	0
753	0
749	0
729	0
706	0
704	0
701	0
697	0
694	0
690	0
687	0
675	0
639	0
621	0
638	0
635	0
634	0
633	0
632	0
631	0
630	0
629	0
628	0
627	0
626	0
625	0
624	0
623	0
760	0
762	0
772	0
774	0
859	0
858	0
857	0
856	0
854	0
853	0
852	0
851	0
846	0
845	0
843	0
842	0
840	0
838	0
836	0
833	0
825	0
822	0
820	0
814	0
813	0
809	0
797	0
795	0
792	0
789	0
788	0
787	0
781	0
622	0
620	0
861	0
555	0
569	0
568	0
567	0
566	0
565	0
564	0
563	0
562	0
561	0
560	0
559	0
558	0
557	0
556	0
554	0
619	0
553	0
552	0
550	0
549	0
548	0
547	0
546	0
545	0
544	0
533	0
532	0
530	0
528	0
527	0
570	0
573	0
574	0
575	0
618	0
617	0
616	0
615	0
614	0
612	0
609	0
608	0
607	0
606	0
605	0
604	0
603	0
601	0
600	0
597	0
594	0
593	0
592	0
591	0
589	0
587	0
586	0
582	0
581	0
579	0
578	0
577	0
576	0
860	0
862	0
1810	0
990	0
1005	0
1004	0
1003	0
1002	0
1001	0
1000	0
999	0
998	0
997	0
996	0
995	0
993	0
992	0
991	0
987	0
967	0
984	0
983	0
982	0
981	0
980	0
979	0
978	0
977	0
976	0
975	0
974	0
973	0
972	0
971	0
1006	0
1008	0
1009	0
1010	0
1043	0
1042	0
1041	0
1039	0
1038	0
1037	0
1036	0
1035	0
1034	0
1033	0
1032	0
1029	0
1028	0
1027	0
1026	0
1025	0
1024	0
1022	0
1021	0
1020	0
1019	0
1018	0
1017	0
1016	0
1015	0
1014	0
1013	0
1012	0
1011	0
970	0
965	0
863	0
894	0
911	0
910	0
909	0
908	0
907	0
906	0
905	0
903	0
902	0
900	0
899	0
897	0
896	0
895	0
892	0
964	0
891	0
890	0
889	0
888	0
887	0
882	0
880	0
879	0
878	0
877	0
876	0
870	0
867	0
866	0
912	0
915	0
916	0
922	0
962	0
959	0
958	0
957	0
956	0
955	0
954	0
953	0
951	0
950	0
949	0
948	0
947	0
945	0
944	0
943	0
942	0
938	0
937	0
936	0
935	0
934	0
933	0
932	0
931	0
929	0
928	0
925	0
924	0
523	0
522	0
519	0
197	0
219	0
218	0
215	0
212	0
211	0
210	0
209	0
208	0
207	0
205	0
204	0
203	0
202	0
199	0
189	0
159	0
188	0
186	0
184	0
183	0
182	0
179	0
175	0
174	0
173	0
172	0
171	0
167	0
166	0
165	0
220	0
221	0
222	0
225	0
277	0
276	0
275	0
274	0
273	0
272	0
271	0
270	0
269	0
268	0
267	0
266	0
265	0
261	0
260	0
259	0
255	0
254	0
246	0
245	0
240	0
238	0
237	0
234	0
231	0
230	0
228	0
227	0
226	0
161	0
149	0
517	0
50	0
65	0
64	0
62	0
61	0
60	0
59	0
58	0
57	0
56	0
55	0
54	0
53	0
52	0
51	0
49	0
148	0
48	0
42	0
39	0
38	0
36	0
35	0
34	0
27	0
26	0
25	0
24	0
22	0
19	0
5	0
73	0
74	0
77	0
78	0
142	0
137	0
133	0
128	0
127	0
123	0
121	0
120	0
119	0
118	0
117	0
116	0
111	0
110	0
109	0
105	0
104	0
103	0
102	0
101	0
100	0
99	0
97	0
95	0
94	0
91	0
90	0
81	0
80	0
278	0
279	0
280	0
430	0
445	0
444	0
443	0
442	0
441	0
440	0
438	0
[truncated: 657 more rows]

## Sheet: SHAP_Endotype_C
GEM Reaction index	SHAP mean
1958	0.639868
2394	0.422502
2466	0.26605
2116	0.251728
2544	0.242093
460	0.230235
457	0.224041
1386	0.224013
1163	0.219006
1930	0.218998
2460	0.208043
2397	0.193177
479	0.19069
2838	0.189462
2485	0.185484
311	0.157882
1315	0.145221
2420	0.139265
2415	0.136725
2730	0.131904
2441	0.113812
2280	0.112257
2007	0.107542
2429	0.107052
1419	0.103628
1556	0.100497
2166	0.0992877
2378	0.097886
250	0.0934052
2308	0.0925547
2443	0.0916181
2465	0.088918
464	0.0877942
2115	0.0872047
2423	0.0806583
1466	0.0804125
2566	0.0790074
426	0.0784153
253	0.0772324
1298	0.073862
2060	0.0704698
2738	0.0703932
1201	0.0662253
1683	0.0655347
1778	0.0620758
2422	0.061581
414	0.0614282
156	0.0602106
2580	0.0599011
2388	0.05946
2163	0.0593165
2453	0.0591686
2279	0.0548109
1577	0.0547111
2467	0.0519196
1639	0.0512622
2193	0.050297
755	0.0498086
2424	0.049396
1665	0.0483442
2395	0.0454346
343	0.0450475
2411	0.0443576
2448	0.0418501
2451	0.0413883
2584	0.0408002
2450	0.0407257
865	0.0404924
2434	0.0399438
258	0.039679
2861	0.0371981
85	0.0359643
2281	0.0344922
2185	0.0330891
590	0.0329368
2478	0.0301236
1299	0.029551
1824	0.0293306
2396	0.029225
1764	0.0279622
2446	0.0275675
150	0.0275585
1616	0.0275549
2592	0.0274958
2461	0.0271457
2419	0.0269045
2305	0.0267409
2410	0.0259492
169	0.025059
1777	0.0250563
994	0.0247047
2387	0.0239265
534	0.022357
2412	0.0222724
1571	0.0220918
1662	0.0219022
2427	0.021466
1560	0.0210692
2300	0.0210404
106	0.0208685
1974	0.020394
2311	0.0202255
2414	0.0196774
1951	0.0193473
2235	0.0187181
1553	0.0186613
2480	0.0177732
2403	0.0174256
2474	0.0173384
2354	0.0171906
2454	0.0165654
926	0.0161236
2015	0.0156686
2382	0.0154016
1967	0.0152274
1712	0.0150407
2393	0.0150322
2416	0.0150116
2421	0.0146782
2470	0.0128932
41	0.0126869
2444	0.0123509
2882	0.0122738
96	0.0120253
2486	0.0119574
2425	0.0118431
2583	0.0113297
2497	0.0113204
2317	0.011279
1734	0.0111492
2802	0.0109172
32	0.0108438
298	0.010493
2590	0.0101411
157	0.00980679
416	0.00978092
2417	0.00969665
1160	0.00917884
2595	0.00911164
2278	0.0088938
1822	0.00881203
960	0.00860161
2494	0.00859796
2452	0.00841844
961	0.00836774
2428	0.00825519
2481	0.00802367
2440	0.00800055
2479	0.00776682
383	0.00738748
1827	0.0073765
2391	0.00711021
2249	0.00708665
2353	0.00679883
2418	0.00657996
2445	0.00637632
2487	0.00637587
2836	0.0063309
1782	0.00614307
1826	0.00613538
2432	0.0060354
2484	0.00602353
1733	0.0059157
1638	0.00588951
378	0.00570899
16	0.00531516
480	0.00531488
2306	0.00526277
2065	0.00525837
988	0.00523438
2492	0.00520902
1781	0.00511836
1250	0.00504304
263	0.00486486
364	0.00481108
1130	0.00475404
1321	0.00474454
152	0.00463433
1467	0.00460974
2447	0.00451016
2392	0.0044677
2389	0.00445659
1973	0.0044195
1630	0.0042892
194	0.0042311
89	0.00422529
580	0.0041844
2439	0.00407334
415	0.0039898
1818	0.00390354
2495	0.0038788
1161	0.0037685
2667	0.00372185
2152	0.00368197
2469	0.00366464
2413	0.00357979
1234	0.00357824
232	0.0034729
1557	0.00337405
921	0.00336938
2767	0.00333692
927	0.00329171
87	0.00325282
1757	0.00320675
1537	0.00310706
2762	0.00306361
344	0.00302379
75	0.00301545
2266	0.0029922
1819	0.00294986
2472	0.00291693
2545	0.00285497
2496	0.00283338
1255	0.00279879
2390	0.00276961
88	0.00275167
84	0.00273955
1314	0.00269656
595	0.00269439
404	0.00268359
375	0.00254234
2433	0.00251013
1927	0.00248008
2499	0.00245504
200	0.00244856
2197	0.00241033
2576	0.00239646
1535	0.00238808
1541	0.00238089
224	0.00237433
256	0.00233811
122	0.00230198
365	0.00226922
2436	0.00225382
458	0.00220372
2102	0.00219082
131	0.00215187
920	0.00213455
535	0.00211311
315	0.00210331
2404	0.0020969
1437	0.00202972
2778	0.00197552
2314	0.00195924
1816	0.00194202
2464	0.00192086
2490	0.00186394
2531	0.00183178
114	0.00182429
2605	0.00177375
1579	0.00175763
1565	0.00174328
379	0.00163891
2371	0.00159575
478	0.0015803
83	0.00154157
1767	0.00150436
2449	0.00148666
2272	0.0014843
352	0.00147719
1334	0.00147016
2568	0.00146035
2832	0.0014301
1747	0.00137883
2811	0.00135307
2430	0.00135013
196	0.00130358
1185	0.00129157
1233	0.00128701
940	0.00128655
462	0.00126918
2288	0.00125032
844	0.00124537
2780	0.00123596
2651	0.00121195
466	0.00120732
316	0.00116695
2322	0.00115837
1319	0.00114957
2463	0.00114478
1594	0.00112856
2483	0.0011192
1559	0.0010792
2363	0.00105735
2239	0.00102312
1318	0.000993939
588	0.000982878
1053	0.000942803
423	0.000941412
289	0.000941046
2030	0.000930448
2603	0.000912179
2276	0.000911423
2862	0.000894412
2286	0.000891116
2459	0.000881788
1213	0.000877301
45	0.000873838
191	0.000865971
2431	0.000861426
2195	0.000838203
1528	0.000797779
108	0.000794342
2106	0.000788225
2290	0.000770751
213	0.000738548
1815	0.000728863
1202	0.000715575
1211	0.00071409
885	0.000708517
300	0.000701553
1416	0.000699151
1538	0.000694728
1189	0.000683363
2488	0.000673511
2084	0.000648541
2473	0.000648421
2860	0.000637348
1732	0.000636369
2493	0.000626663
1771	0.000625175
1534	0.000622691
849	0.000617007
1595	0.000600348
1421	0.000598577
536	0.000597001
124	0.00058651
2837	0.000585628
2805	0.000577438
2167	0.000573596
2593	0.000560912
1823	0.000554142
1143	0.000553139
2291	0.000553129
2801	0.000531051
2061	0.000515645
151	0.000490503
2149	0.000468498
2744	0.000465001
2032	0.000457282
2886	0.000447218
1825	0.000436755
2194	0.000436033
1661	0.000428015
1309	0.000425833
107	0.000422603
4	0.000410423
76	0.000409671
806	0.000394479
2587	0.000384896
2671	0.00036672
2400	0.000364349
2081	0.000363403
447	0.000362644
770	0.000350532
2770	0.000344571
129	0.000339415
1124	0.000338202
2399	0.000335033
306	0.000323996
1554	0.000312654
223	0.000303806
730	0.000296278
598	0.000295475
1754	0.00029501
1438	0.00029468
2301	0.000283333
2250	0.000281381
2670	0.000280869
579	0.000275317
1322	0.000266076
2898	0.000264529
2240	0.000253823
493	0.000238105
473	0.000229017
140	0.000224012
350	0.000219989
868	0.000213124
153	0.000212459
1040	0.000208294
1382	0.000207596
86	0.000205255
2277	0.000200412
301	0.00020007
1562	0.000198904
2672	0.000193345
2319	0.000190342
1659	0.000189187
2210	0.000179085
1279	0.000178636
93	0.000168435
2209	0.000157363
731	0.000156035
2594	0.000154835
1240	0.000153985
2017	0.00015318
2364	0.000151949
2228	0.000144914
1812	0.000137561
2560	0.000129991
1578	0.000120286
2150	0.000119835
475	0.000119734
2673	0.000117011
307	0.000110725
2154	0.000109795
487	0.000108854
1919	9.81382e-05
329	9.51386e-05
1149	9.42952e-05
1231	9.31917e-05
1632	9.25733e-05
1741	9.06326e-05
1460	8.77491e-05
1141	8.72343e-05
2769	8.62236e-05
368	8.35172e-05
2522	8.3316e-05
1920	7.93167e-05
1338	7.80912e-05
583	7.75013e-05
471	7.68865e-05
1368	7.6062e-05
1524	7.55061e-05
915	7.45731e-05
1084	7.30887e-05
72	7.0046e-05
768	6.87464e-05
963	6.76733e-05
2398	6.73481e-05
2829	5.58487e-05
2227	5.58075e-05
2246	5.42847e-05
2589	5.38061e-05
2682	5.05359e-05
1587	4.94006e-05
966	4.85359e-05
1385	4.73822e-05
1975	4.48903e-05
249	4.4874e-05
388	4.45701e-05
2462	4.44237e-05
1574	4.334e-05
2596	4.20711e-05
1193	4.11068e-05
1172	3.95144e-05
2055	3.9436e-05
1966	3.7354e-05
2573	3.73348e-05
746	3.69469e-05
2894	3.6916e-05
1199	3.66847e-05
2318	3.66752e-05
2558	3.59797e-05
893	3.57035e-05
2406	3.52174e-05
2550	3.31379e-05
1718	3.3083e-05
1024	3.27982e-05
168	3.27971e-05
2551	3.2097e-05
363	3.1213e-05
1660	3.10158e-05
1473	3.08627e-05
2089	3.08407e-05
382	3.08214e-05
1	2.93274e-05
369	2.88862e-05
2771	2.71561e-05
848	2.71091e-05
177	2.69844e-05
2408	2.69024e-05
130	2.67402e-05
304	2.61087e-05
454	2.60355e-05
1663	2.58773e-05
1673	2.53608e-05
2547	2.48593e-05
790	2.47593e-05
888	2.44347e-05
176	2.43143e-05
1921	2.42983e-05
678	2.42181e-05
18	2.41207e-05
1668	2.38726e-05
1243	2.37666e-05
688	2.32089e-05
514	2.24425e-05
2527	2.22675e-05
3	2.21656e-05
251	2.17946e-05
2324	2.15045e-05
2270	2.1376e-05
254	2.13129e-05
1164	2.13117e-05
229	2.09588e-05
2633	2.08581e-05
1252	2.0432e-05
2666	1.95574e-05
2840	1.93029e-05
2130	1.92639e-05
611	1.90467e-05
6	1.89629e-05
1420	1.81934e-05
584	1.80588e-05
1688	1.76841e-05
571	1.73439e-05
602	1.70443e-05
802	1.69611e-05
2458	1.67926e-05
465	1.67646e-05
2606	1.66632e-05
342	1.666e-05
2609	1.65888e-05
2571	1.64689e-05
572	1.64449e-05
201	1.58903e-05
1210	1.57624e-05
835	1.56215e-05
2327	1.4992e-05
135	1.48536e-05
17	1.48026e-05
636	1.4709e-05
112	1.39593e-05
2191	1.3822e-05
1200	1.37971e-05
1296	1.37325e-05
237	1.36731e-05
2437	1.36524e-05
681	1.33119e-05
518	1.32164e-05
1947	1.31884e-05
71	1.30618e-05
138	1.30446e-05
529	1.30114e-05
883	1.29932e-05
1798	1.29342e-05
1123	1.28844e-05
1029	1.28579e-05
2100	1.27125e-05
1952	1.26051e-05
1513	1.25525e-05
360	1.2433e-05
134	1.21189e-05
2719	1.21175e-05
2500	1.21078e-05
2442	1.2081e-05
676	1.20658e-05
2498	1.19699e-05
1320	1.19686e-05
694	1.19664e-05
2539	1.18426e-05
215	1.1839e-05
2171	1.18144e-05
2505	1.18108e-05
234	1.1786e-05
2557	1.17692e-05
850	1.17183e-05
132	1.16666e-05
2813	1.15714e-05
1242	1.15344e-05
1550	1.15025e-05
236	1.1399e-05
2313	1.11585e-05
1720	1.09601e-05
257	1.09099e-05
2377	1.09037e-05
2283	1.07127e-05
2644	1.0596e-05
989	1.02041e-05
30	1.01461e-05
2471	1.01408e-05
366	1.00857e-05
1256	1.00802e-05
2823	1.0019e-05
2457	9.8904e-06
544	9.77318e-06
1136	9.73794e-06
82	9.68466e-06
23	9.61172e-06
1748	9.39765e-06
2503	9.35633e-06
1208	9.34124e-06
1297	9.19463e-06
2588	9.097e-06
2064	9.06633e-06
248	8.98567e-06
2533	8.98414e-06
1135	8.94625e-06
986	8.94173e-06
930	8.92318e-06
1739	8.8954e-06
2535	8.84261e-06
313	8.82929e-06
2092	8.75779e-06
2575	8.62238e-06
886	8.43942e-06
1626	8.38638e-06
1715	8.32528e-06
2549	8.23809e-06
2604	8.20349e-06
2385	8.16237e-06
164	8.10483e-06
446	8.0849e-06
2258	8.02147e-06
761	7.95252e-06
497	7.91929e-06
946	7.88556e-06
46	7.80137e-06
2188	7.69838e-06
2	7.66695e-06
1457	7.6328e-06
143	7.61996e-06
2016	7.55624e-06
1766	7.55399e-06
525	7.49825e-06
113	7.46319e-06
1701	7.44704e-06
1758	7.43399e-06
499	7.41487e-06
292	7.37084e-06
2384	7.2968e-06
2546	7.26543e-06
1580	7.26326e-06
2407	7.2242e-06
828	7.19704e-06
1443	7.19148e-06
2133	7.1564e-06
2217	7.15198e-06
115	7.0766e-06
2528	7.0553e-06
314	7.03676e-06
2567	6.97267e-06
2501	6.9611e-06
516	6.89442e-06
1717	6.87717e-06
2668	6.79586e-06
1744	6.77795e-06
448	6.76111e-06
1607	6.756e-06
295	6.71587e-06
526	6.71472e-06
1399	6.58695e-06
1719	6.55915e-06
2254	6.55685e-06
1096	6.53381e-06
939	6.51997e-06
1157	6.49394e-06
1023	6.44217e-06
710	6.40072e-06
159	6.38627e-06
2401	6.35956e-06
833	6.3454e-06
1839	6.33806e-06
1745	6.32355e-06
354	6.29566e-06
884	6.29319e-06
2039	6.25163e-06
2380	6.20147e-06
63	6.19914e-06
31	6.1368e-06
2325	6.10474e-06
2294	6.02742e-06
389	6.00264e-06
1953	5.99248e-06
2233	5.93508e-06
1257	5.90724e-06
752	5.86139e-06
20	5.81375e-06
1774	5.7816e-06
2555	5.76477e-06
941	5.74316e-06
351	5.74086e-06
2260	5.73289e-06
1408	5.73129e-06
193	5.72048e-06
43	5.66602e-06
2570	5.65094e-06
2548	5.63884e-06
1698	5.5934e-06
2842	5.56679e-06
44	5.53134e-06
2251	5.52994e-06
381	5.52542e-06
7	5.50237e-06
898	5.50204e-06
1139	5.49101e-06
1051	5.47405e-06
964	5.46397e-06
2438	5.45621e-06
217	5.36338e-06
141	5.35045e-06
637	5.34924e-06
185	5.27509e-06
2643	5.2628e-06
1445	5.24555e-06
685	5.24351e-06
1878	5.23469e-06
2542	5.20273e-06
1444	5.1883e-06
1640	5.15682e-06
496	5.08127e-06
2186	4.96214e-06
2153	4.95098e-06
358	4.88192e-06
51	4.8235e-06
1950	4.80946e-06
1525	4.75639e-06
1949	4.74527e-06
28	4.7408e-06
345	4.72301e-06
929	4.70554e-06
2565	4.69661e-06
2326	4.66593e-06
2289	4.65924e-06
2879	4.62196e-06
385	4.60917e-06
2831	4.57613e-06
553	4.57127e-06
1613	4.5019e-06
66	4.49752e-06
2538	4.47483e-06
1809	4.46769e-06
180	4.44921e-06
79	4.36559e-06
914	4.3631e-06
439	4.36272e-06
212	4.35183e-06
2348	4.35083e-06
2506	4.31602e-06
1787	4.31163e-06
796	4.27634e-06
392	4.25046e-06
2307	4.21274e-06
498	4.12158e-06
1207	4.10714e-06
39	4.10121e-06
2892	4.08539e-06
305	4.06302e-06
2218	4.05638e-06
1312	4.04675e-06
1946	4.04011e-06
596	4.01947e-06
2525	4.01621e-06
500	3.99003e-06
308	3.98819e-06
2189	3.95795e-06
126	3.93022e-06
1453	3.90791e-06
1287	3.88715e-06
922	3.87578e-06
259	3.85524e-06
401	3.84412e-06
2610	3.78212e-06
917	3.76996e-06
2579	3.75967e-06
918	3.72237e-06
1928	3.71574e-06
2509	3.71034e-06
1030	3.66292e-06
1760	3.65437e-06
2165	3.65421e-06
1799	3.6353e-06
1536	3.61448e-06
552	3.6092e-06
2843	3.56247e-06
1722	3.55229e-06
302	3.55156e-06
290	3.52115e-06
2309	3.48318e-06
1598	3.44536e-06
2477	3.42059e-06
37	3.39488e-06
2600	3.38053e-06
1248	3.36623e-06
2511	3.35079e-06
766	3.33328e-06
2038	3.33131e-06
1606	3.31194e-06
2504	3.27917e-06
2601	3.18216e-06
214	3.16387e-06
985	3.14031e-06
2067	3.13751e-06
1746	3.12321e-06
1289	3.0674e-06
875	3.04537e-06
247	3.03571e-06
687	2.9834e-06
2562	2.95983e-06
2170	2.94326e-06
675	2.94149e-06
2660	2.94134e-06
2521	2.93771e-06
326	2.9345e-06
33	2.90644e-06
524	2.90366e-06
1657	2.89796e-06
47	2.89734e-06
262	2.88397e-06
2896	2.87801e-06
2148	2.86866e-06
158	2.86514e-06
233	2.86319e-06
666	2.85171e-06
170	2.84257e-06
578	2.83209e-06
1447	2.82973e-06
618	2.82639e-06
373	2.82589e-06
2554	2.82156e-06
283	2.81935e-06
1539	2.81187e-06
1451	2.79495e-06
1009	2.7839e-06
1260	2.78293e-06
244	2.78274e-06
952	2.75844e-06
1398	2.75574e-06
2863	2.74854e-06
1540	2.72305e-06
2793	2.69378e-06
163	2.69365e-06
2655	2.6914e-06
1796	2.67445e-06
2747	2.67292e-06
155	2.61631e-06
2563	2.6112e-06
554	2.5943e-06
2402	2.59131e-06
162	2.59041e-06
847	2.59024e-06
1167	2.58766e-06
2524	2.58657e-06
2536	2.57575e-06
1658	2.55134e-06
2207	2.55027e-06
70	2.54092e-06
968	2.5336e-06
357	2.51683e-06
1397	2.49799e-06
2482	2.47399e-06
551	2.47325e-06
1045	2.47162e-06
2475	2.46596e-06
695	2.46057e-06
340	2.44944e-06
394	2.44065e-06
1933	2.40403e-06
2864	2.3908e-06
398	2.38168e-06
396	2.38099e-06
197	2.38018e-06
1588	2.35199e-06
530	2.34988e-06
2212	2.34774e-06
1711	2.34747e-06
2383	2.34498e-06
1206	2.34445e-06
2541	2.34331e-06
919	2.3409e-06
2514	2.3267e-06
406	2.32662e-06
1710	2.29888e-06
2540	2.29777e-06
1454	2.29436e-06
2316	2.27474e-06
2669	2.27309e-06
1545	2.26354e-06
881	2.25552e-06
1458	2.23851e-06
317	2.22611e-06
2063	2.22445e-06
216	2.22326e-06
2013	2.21952e-06
2850	2.21734e-06
795	2.21633e-06
470	2.21405e-06
452	2.20825e-06
599	2.20791e-06
1057	2.20032e-06
2529	2.19164e-06
264	2.16074e-06
774	2.15879e-06
1442	2.14949e-06
255	2.1486e-06
758	2.12296e-06
2221	2.12286e-06
1942	2.1226e-06
2134	2.10824e-06
2543	2.10575e-06
160	2.10414e-06
2508	2.09737e-06
2530	2.09259e-06
239	2.09076e-06
1627	2.08825e-06
1063	2.04748e-06
1617	2.04725e-06
2502	2.03576e-06
1836	2.02031e-06
2232	2.01787e-06
1284	2.01257e-06
450	1.99629e-06
2641	1.9885e-06
809	1.97689e-06
1409	1.97373e-06
1158	1.97003e-06
198	1.92345e-06
405	1.9229e-06
1642	1.89857e-06
288	1.88472e-06
181	1.88277e-06
1424	1.87485e-06
2526	1.86649e-06
1165	1.86262e-06
1959	1.85319e-06
145	1.84027e-06
2975	1.82885e-06
125	1.81422e-06
1249	1.81072e-06
1463	1.79502e-06
2507	1.77799e-06
173	1.7762e-06
2088	1.77374e-06
1945	1.76646e-06
1448	1.76631e-06
2867	1.76483e-06
610	1.74906e-06
2776	1.74618e-06
1547	1.7323e-06
823	1.72933e-06
2569	1.7285e-06
1597	1.71632e-06
635	1.71163e-06
347	1.70344e-06
29	1.7031e-06
2662	1.69172e-06
2056	1.66338e-06
2659	1.65934e-06
1373	1.65436e-06
1593	1.64204e-06
2095	1.61879e-06
1742	1.61808e-06
1651	1.61216e-06
1087	1.59841e-06
1140	1.56736e-06
765	1.5625e-06
2578	1.56071e-06
1636	1.55996e-06
2572	1.55521e-06
782	1.55131e-06
2556	1.54508e-06
1751	1.53325e-06
1716	1.51421e-06
2386	1.50955e-06
531	1.50685e-06
2523	1.50634e-06
355	1.50607e-06
933	1.49741e-06
1492	1.49731e-06
1681	1.48576e-06
376	1.47238e-06
2379	1.47195e-06
1850	1.46238e-06
2519	1.45797e-06
585	1.44893e-06
417	1.44327e-06
2381	1.441e-06
2534	1.43829e-06
686	1.42624e-06
2803	1.41269e-06
2213	1.40957e-06
1605	1.40571e-06
2468	1.40427e-06
261	1.39734e-06
515	1.39356e-06
1775	1.37151e-06
2175	1.35991e-06
489	1.35175e-06
2694	1.3421e-06
1032	1.33679e-06
2489	1.32763e-06
495	1.32403e-06
2203	1.32194e-06
488	1.31625e-06
684	1.31396e-06
1316	1.29624e-06
2426	1.29154e-06
136	1.28914e-06
2205	1.2738e-06
2128	1.26559e-06
1159	1.26507e-06
2598	1.2626e-06
2161	1.25896e-06
2537	1.25182e-06
386	1.24595e-06
69	1.23949e-06
1082	1.2201e-06
2476	1.21958e-06
282	1.21345e-06
361	1.20936e-06
838	1.20794e-06
864	1.20703e-06
390	1.1955e-06
2295	1.18866e-06
1542	1.17085e-06
2312	1.17066e-06
1452	1.16095e-06
1490	1.15255e-06
98	1.15026e-06
5	1.14336e-06
1684	1.13496e-06
1288	1.13207e-06
1400	1.12411e-06
105	1.12305e-06
2553	1.10679e-06
2252	1.10234e-06
759	1.09774e-06
781	1.0973e-06
139	1.09096e-06
2763	1.08992e-06
2517	1.08974e-06
2160	1.0844e-06
2184	1.07794e-06
1054	1.07228e-06
195	1.06125e-06
612	1.06021e-06
1295	1.05878e-06
2653	1.05326e-06
2626	1.05262e-06
2268	1.036e-06
67	1.02969e-06
2515	1.0236e-06
1753	1.00257e-06
2518	9.90564e-07
2574	9.89493e-07
1612	9.44857e-07
2878	9.40744e-07
1348	9.32206e-07
813	9.25603e-07
455	9.25414e-07
923	9.19235e-07
1431	8.89061e-07
2581	8.79696e-07
2002	8.76367e-07
2512	8.75858e-07
2248	8.70016e-07
2663	8.64573e-07
1286	8.58327e-07
2559	8.50999e-07
402	8.41658e-07
853	8.4112e-07
2456	8.37026e-07
2599	8.3389e-07
613	8.2275e-07
2582	8.13848e-07
81	8.10056e-07
1968	8.01288e-07
294	7.98188e-07
2561	7.95777e-07
772	7.9376e-07
377	7.82722e-07
2708	7.78314e-07
2707	7.59039e-07
987	7.54841e-07
2516	7.51755e-07
1948	7.49828e-07
2310	7.45667e-07
1293	7.41909e-07
1609	7.34898e-07
2491	7.24702e-07
293	7.2006e-07
628	7.15467e-07
1337	7.11167e-07
1515	6.97046e-07
1797	6.84117e-07
1923	6.68001e-07
760	6.48425e-07
1795	6.31124e-07
2241	6.19434e-07
2585	6.00318e-07
2577	5.94385e-07
235	5.7969e-07
238	5.76259e-07
1831	5.67415e-07
2552	5.67171e-07
804	5.60841e-07
2147	5.51075e-07
2830	5.42819e-07
240	5.37874e-07
1313	5.29803e-07
1007	5.23945e-07
2608	4.99362e-07
1035	4.90943e-07
840	4.76024e-07
1514	4.47874e-07
2230	4.40184e-07
2242	4.25079e-07
2564	4.19961e-07
2220	4.0776e-07
2085	4.03429e-07
1736	3.98492e-07
2359	3.97836e-07
1017	3.74384e-07
2409	3.67175e-07
1769	3.65672e-07
1730	3.63042e-07
323	3.62461e-07
192	3.46242e-07
1036	3.45345e-07
1714	3.45285e-07
371	3.32848e-07
2985	3.25568e-07
2315	3.02039e-07
2225	2.97115e-07
161	2.87449e-07
2183	2.82948e-07
1723	2.55452e-07
187	2.38498e-07
2859	1.82763e-07
1674	1.80897e-07
387	1.63396e-07
154	1.29388e-07
2983	0
1969	0
1903	0
2984	0
1970	0
1957	0
2946	0
1971	0
1898	0
1899	0
2962	0
1972	0
1901	0
1900	0
1902	0
2996	0
1904	0
1976	0
1913	0
1912	0
2963	0
1980	0
1911	0
1979	0
1910	0
2062	0
1978	0
1954	0
2981	0
1955	0
1977	0
1909	0
1908	0
2066	0
2961	0
1907	0
1906	0
1905	0
2982	0
1956	0
2072	0
2960	0
1893	0
2082	0
2083	0
1896	0
2950	0
1965	0
1964	0
2949	0
1963	0
1895	0
1894	0
1892	0
2952	0
1891	0
1890	0
2948	0
1889	0
1961	0
2086	0
2087	0
1888	0
1962	0
2947	0
2951	0
2953	0
2068	0
1960	0
2069	0
2959	0
2070	0
2071	0
2958	0
1981	0
2073	0
2074	0
2075	0
2076	0
2077	0
2989	0
2078	0
1897	0
2957	0
2986	0
2079	0
2956	0
2955	0
2080	0
2988	0
2954	0
1914	0
2964	0
1915	0
2043	0
2036	0
1929	0
2020	0
2019	0
2993	0
2018	0
2992	0
2037	0
2973	0
1941	0
2974	0
2014	0
1926	0
2012	0
2011	0
1925	0
2040	0
2010	0
2041	0
1924	0
2991	0
2042	0
2008	0
1940	0
2021	0
2023	0
2972	0
2970	0
2969	0
2994	0
1938	0
1937	0
2971	0
1936	0
2027	0
2028	0
2029	0
2968	0
2024	0
1935	0
2031	0
1934	0
2026	0
2025	0
2033	0
1931	0
1939	0
2034	0
2035	0
2976	0
2044	0
1916	0
2045	0
2052	0
1990	0
1944	0
2053	0
2054	0
2978	0
2966	0
1989	0
1988	0
1987	0
1986	0
1985	0
1918	0
1984	0
1983	0
2057	0
2965	0
1917	0
1982	0
2979	0
2058	0
2980	0
2059	0
2977	0
1991	0
1922	0
2990	0
2046	0
2047	0
2006	0
2048	0
2005	0
2004	0
2049	0
2050	0
2003	0
2001	0
2967	0
2051	0
2000	0
1999	0
1998	0
1943	0
1997	0
1996	0
1995	0
1994	0
1993	0
1992	0
2022	0
2751	0
2090	0
2865	0
2851	0
2852	0
2853	0
2854	0
2855	0
2856	0
2857	0
2858	0
2866	0
2945	0
2868	0
2869	0
2870	0
2871	0
2872	0
2873	0
2874	0
2875	0
2849	0
2455	0
2848	0
2847	0
2822	0
2824	0
2825	0
2826	0
2827	0
2828	0
2532	0
2833	0
2834	0
2510	0
2835	0
2839	0
2841	0
1886	0
2844	0
2845	0
2846	0
2876	0
2877	0
2880	0
2362	0
2360	0
2357	0
2356	0
2355	0
2350	0
2349	0
2347	0
2346	0
2345	0
2344	0
2343	0
2342	0
2341	0
2340	0
2339	0
2338	0
2337	0
2361	0
2895	0
2881	0
2365	0
2883	0
2884	0
2885	0
2887	0
2888	0
2889	0
2890	0
2891	0
2893	0
2375	0
2374	0
2373	0
2372	0
2370	0
2369	0
2368	0
2366	0
2821	0
2820	0
2819	0
2686	0
2684	0
2683	0
2681	0
2680	0
2679	0
2678	0
2677	0
2676	0
2675	0
2674	0
2753	0
2755	0
2765	0
2665	0
2779	0
2664	0
2661	0
2685	0
2691	0
2658	0
2695	0
2746	0
2752	0
2742	0
2741	0
2736	0
2731	0
2729	0
2718	0
2711	0
2710	0
2709	0
2706	0
2702	0
2701	0
2700	0
2699	0
2696	0
2781	0
2657	0
2818	0
2611	0
2785	0
2787	0
2602	0
2791	0
2792	0
2794	0
2804	0
2807	0
2808	0
2586	0
2809	0
2810	0
2812	0
2814	0
2815	0
2816	0
2817	0
2607	0
2614	0
2656	0
2615	0
2654	0
2652	0
2782	0
2650	0
2649	0
2648	0
2647	0
2646	0
2645	0
2642	0
2640	0
2638	0
2637	0
2636	0
2634	0
2627	0
2616	0
2336	0
2335	0
2334	0
2177	0
2174	0
2173	0
2937	0
2169	0
2168	0
2164	0
2162	0
2159	0
2158	0
2938	0
2155	0
2151	0
2939	0
2146	0
2145	0
2144	0
2940	0
2176	0
2178	0
2143	0
2179	0
2214	0
2211	0
2206	0
2204	0
2202	0
2201	0
2200	0
2199	0
2198	0
2196	0
2935	0
2192	0
2190	0
2187	0
2936	0
2182	0
2180	0
2941	0
2142	0
2216	0
2112	0
2110	0
2109	0
2108	0
2107	0
2943	0
2105	0
2104	0
2103	0
2944	0
2101	0
2099	0
2098	0
2097	0
2096	0
2094	0
2093	0
2091	0
2111	0
2113	0
2141	0
2114	0
2140	0
2139	0
2138	0
2137	0
2136	0
2135	0
2132	0
2131	0
2129	0
2127	0
2126	0
2121	0
2120	0
2119	0
2118	0
2117	0
2942	0
2215	0
2219	0
2333	0
2304	0
2302	0
2911	0
2913	0
2914	0
2299	0
2298	0
2297	0
2915	0
2296	0
2916	0
2293	0
2292	0
2917	0
2918	0
2919	0
2285	0
2284	0
2303	0
2909	0
2920	0
2908	0
2332	0
2331	0
2330	0
2329	0
2897	0
2899	0
2328	0
2900	0
2901	0
2323	0
2902	0
2321	0
2320	0
2903	0
2904	0
2905	0
2906	0
2282	0
2275	0
2222	0
2928	0
2929	0
2245	0
2244	0
2243	0
2930	0
2931	0
2238	0
2236	0
2932	0
2234	0
2231	0
2229	0
2933	0
2934	0
2226	0
2224	0
2223	0
2247	0
2927	0
2274	0
2926	0
2273	0
2921	0
2922	0
2271	0
2269	0
2267	0
2265	0
2923	0
2264	0
2263	0
2261	0
2259	0
2257	0
2255	0
2924	0
2253	0
2925	0
1887	0
1533	0
1885	0
856	0
878	0
877	0
876	0
870	0
867	0
866	0
863	0
862	0
861	0
860	0
859	0
858	0
857	0
854	0
936	0
852	0
851	0
846	0
845	0
843	0
842	0
836	0
825	0
822	0
820	0
814	0
797	0
792	0
879	0
880	0
882	0
887	0
934	0
932	0
931	0
928	0
925	0
924	0
916	0
912	0
911	0
910	0
909	0
908	0
907	0
906	0
905	0
903	0
902	0
900	0
899	0
897	0
896	0
895	0
894	0
892	0
891	0
890	0
889	0
789	0
788	0
787	0
615	0
609	0
608	0
607	0
606	0
605	0
604	0
603	0
601	0
600	0
597	0
594	0
593	0
592	0
591	0
589	0
587	0
586	0
582	0
581	0
577	0
576	0
575	0
574	0
573	0
570	0
569	0
568	0
614	0
616	0
785	0
617	0
762	0
757	0
753	0
749	0
729	0
706	0
704	0
701	0
697	0
690	0
639	0
638	0
634	0
633	0
632	0
631	0
630	0
629	0
627	0
626	0
625	0
624	0
623	0
622	0
621	0
620	0
619	0
935	0
937	0
1100	0
1044	0
1062	0
1061	0
1060	0
1059	0
1058	0
1056	0
1055	0
1052	0
1050	0
1049	0
1048	0
1047	0
1046	0
1043	0
938	0
1042	0
1041	0
1039	0
1038	0
1037	0
1034	0
1033	0
1028	0
1027	0
1026	0
1025	0
1022	0
1021	0
1064	0
1065	0
1066	0
1067	0
1098	0
1097	0
1095	0
1094	0
1093	0
1092	0
1091	0
1090	0
1089	0
1088	0
1086	0
1085	0
1083	0
1081	0
1080	0
1079	0
1078	0
1077	0
1076	0
1075	0
1074	0
1073	0
1072	0
1071	0
1070	0
1069	0
1068	0
1020	0
1019	0
1018	0
978	0
976	0
975	0
974	0
973	0
972	0
971	0
970	0
969	0
967	0
965	0
962	0
959	0
958	0
957	0
956	0
955	0
954	0
953	0
951	0
950	0
949	0
948	0
947	0
945	0
944	0
943	0
942	0
977	0
979	0
1016	0
980	0
1015	0
1014	0
1013	0
1012	0
1011	0
1010	0
1008	0
1006	0
1005	0
1004	0
1003	0
1002	0
1001	0
1000	0
999	0
998	0
997	0
996	0
995	0
993	0
992	0
991	0
990	0
984	0
983	0
982	0
981	0
567	0
566	0
565	0
203	0
225	0
222	0
221	0
220	0
219	0
218	0
211	0
210	0
209	0
208	0
207	0
205	0
204	0
202	0
564	0
199	0
189	0
188	0
186	0
184	0
183	0
182	0
179	0
175	0
174	0
172	0
171	0
167	0
226	0
227	0
228	0
230	0
296	0
291	0
287	0
286	0
285	0
284	0
281	0
280	0
279	0
278	0
277	0
276	0
275	0
274	0
273	0
272	0
271	0
270	0
269	0
268	0
267	0
266	0
265	0
260	0
246	0
245	0
231	0
166	0
165	0
149	0
74	0
65	0
64	0
62	0
61	0
60	0
59	0
58	0
57	0
56	0
55	0
54	0
53	0
52	0
50	0
49	0
48	0
42	0
38	0
36	0
35	0
34	0
27	0
26	0
25	0
24	0
[truncated: 657 more rows]

## Sheet: SHAP_Endotype_D
GEM Reaction index	SHAP mean
1927	0.804076
1930	0.714982
1616	0.659517
2429	0.374571
2388	0.280621
885	0.272483
1419	0.26479
2394	0.252941
464	0.199448
2730	0.196576
2311	0.192978
16	0.18534
229	0.18461
457	0.182023
2396	0.173515
2838	0.157938
2466	0.149344
1951	0.146227
1130	0.14394
85	0.134634
2485	0.134251
865	0.125773
2404	0.123365
2434	0.11904
2861	0.117067
1163	0.107655
2467	0.103866
493	0.103133
2306	0.102584
2166	0.0923209
2308	0.0898106
2495	0.0891816
2584	0.0881941
2478	0.0849334
2882	0.0837819
893	0.0798005
534	0.078427
224	0.0753141
1559	0.0744528
1334	0.0739357
2065	0.0684857
2436	0.0670985
1298	0.0596749
1571	0.0579993
75	0.057998
239	0.0547283
2490	0.0528868
823	0.0498061
1202	0.0471711
2450	0.0461427
2480	0.0459027
1466	0.0445262
2411	0.0440479
2412	0.0436122
2266	0.0430658
2483	0.0422851
329	0.0415982
2441	0.041239
289	0.0408846
2448	0.0395728
2418	0.0391737
1201	0.0390954
2030	0.0387195
1338	0.0369043
1557	0.0367183
1822	0.0363595
1732	0.0361861
2481	0.0321559
88	0.0319272
1467	0.0314235
2439	0.0302586
994	0.029597
253	0.0291511
2544	0.0290766
479	0.0276564
535	0.0273753
595	0.0268148
1781	0.0266188
2778	0.0259802
2015	0.0252789
164	0.0251968
1953	0.0245996
344	0.024249
196	0.0242428
2479	0.0221828
2459	0.0220854
1565	0.0213387
250	0.0212856
2487	0.0208644
1293	0.0208121
678	0.0200052
961	0.0198539
2417	0.0195104
2039	0.019046
298	0.0189124
2423	0.018792
2081	0.0185788
2580	0.0182397
2420	0.0178321
131	0.0175784
1595	0.0173429
1826	0.0170199
848	0.0170189
1160	0.0168728
2321	0.0166953
1665	0.016694
927	0.0163958
1386	0.0161662
41	0.0157972
2017	0.0157034
151	0.0157027
921	0.0153516
960	0.015191
2432	0.0151345
2497	0.0150031
2185	0.0148854
2007	0.0144233
2416	0.0143657
2474	0.01432
462	0.0142046
2393	0.0140603
352	0.0139572
1438	0.0138661
2603	0.0133914
364	0.0132238
258	0.013141
2288	0.0122696
988	0.0120744
766	0.0118737
2389	0.0116183
2314	0.011512
350	0.0114962
898	0.0113754
1556	0.0111605
1818	0.0110764
300	0.0110539
2390	0.0103746
2651	0.0102744
2387	0.0101441
1053	0.0100644
2447	0.0100149
2595	0.00975743
2568	0.00975195
2106	0.00950059
849	0.00944963
76	0.00939874
2576	0.00926858
2566	0.00906033
2469	0.00900138
1767	0.00894875
2163	0.00887626
1535	0.00883243
1967	0.00859098
2605	0.0077555
1774	0.00765108
2312	0.00759593
2484	0.00759304
157	0.0075623
2470	0.00748093
2767	0.00742216
2421	0.00737498
2460	0.00735166
2279	0.0072327
1185	0.0069951
343	0.00685771
1638	0.00683907
1764	0.00671859
2391	0.00666203
2060	0.00657459
2415	0.00653938
2419	0.00640868
1189	0.00634964
86	0.00634007
2410	0.00628613
1734	0.00626585
2472	0.00623201
588	0.00622596
2167	0.00620402
770	0.00614066
2499	0.00597478
2531	0.00542683
920	0.00519422
796	0.00512533
2305	0.00505484
536	0.00498187
2886	0.00496808
2382	0.00494465
2496	0.00491375
1319	0.00491207
2378	0.00480455
1382	0.00466175
447	0.00457505
2317	0.00456059
2319	0.00444602
2452	0.00444076
2240	0.00431552
2280	0.00424651
1733	0.00424429
1233	0.00418509
2451	0.00418186
2115	0.0041686
2414	0.00399009
156	0.0039885
460	0.00392261
2354	0.00390975
1683	0.0038867
2300	0.00386444
2454	0.00383012
256	0.00371903
2593	0.00357803
2486	0.00355538
45	0.00354723
1541	0.00350694
1314	0.00350354
2807	0.00348629
1528	0.00347514
379	0.00345618
2413	0.00344288
2395	0.00338571
1973	0.00337039
710	0.00333736
2453	0.00330719
2473	0.00329401
2494	0.0032535
1778	0.00320713
2667	0.00319588
130	0.00318872
2449	0.00316972
2428	0.00315743
2770	0.00314245
2465	0.00309156
416	0.00305065
106	0.00301017
1757	0.00300375
2424	0.00299668
431	0.00290695
1594	0.00289272
2673	0.00288821
675	0.0028795
1524	0.00287355
1143	0.00282253
404	0.0027932
301	0.0027844
1639	0.00275101
2353	0.00274503
2461	0.00274296
1630	0.00273964
1712	0.00272836
84	0.00270751
132	0.00268683
611	0.00264863
1437	0.00250834
2286	0.00248369
311	0.00246419
96	0.0024562
452	0.00243598
2860	0.00239044
1299	0.00237644
1234	0.00236824
2440	0.00235163
2443	0.00234214
755	0.0023343
1534	0.00229686
2463	0.00229395
89	0.00227943
1231	0.00227322
1974	0.00225237
2195	0.00221089
1958	0.00217335
822	0.0021713
122	0.00211596
583	0.00211268
1868	0.00204047
1631	0.00203747
150	0.00203423
1878	0.00200451
2392	0.00197531
1211	0.00196752
1782	0.00194266
2133	0.00192992
2492	0.00192608
2590	0.00191909
1816	0.00185743
2061	0.00184321
1577	0.00184046
1824	0.00181725
1255	0.00181413
2193	0.00179415
886	0.00177021
2831	0.00176943
383	0.00175362
415	0.00170252
1975	0.00167897
1040	0.00164433
1024	0.00164387
1348	0.00163614
2371	0.00162863
1025	0.00162202
2445	0.00162039
375	0.00159519
760	0.00156302
888	0.0015593
2430	0.00155679
1661	0.00154897
458	0.00154545
590	0.00153978
2862	0.00153157
2802	0.00146997
1213	0.00141832
2427	0.0014159
365	0.00141495
2425	0.0013817
2744	0.00135383
765	0.00134656
1827	0.00134254
152	0.0013358
140	0.00130052
926	0.00129591
2671	0.00128804
2780	0.00127428
1149	0.0012437
2363	0.00123381
414	0.00122991
223	0.00121643
1321	0.00118832
1161	0.00117907
2322	0.00115201
200	0.00113375
2875	0.00111847
2464	0.00109861
2116	0.00108477
2811	0.00107189
1250	0.00104071
580	0.00103712
940	0.00101196
2249	0.00100552
232	0.000988664
2462	0.00097818
2587	0.000977724
2975	0.000941947
2488	0.000937024
263	0.000931488
315	0.000921255
2493	0.000908545
1553	0.000905719
306	0.00090342
378	0.000893679
1279	0.000861364
2301	0.000861241
1662	0.000858413
2272	0.000835351
2834	0.000831407
844	0.000815882
2281	0.000807701
2422	0.000797763
820	0.000792414
2661	0.000787487
2583	0.000783063
363	0.000777266
108	0.000766876
2197	0.000746233
531	0.000725751
2801	0.000725724
1777	0.000723721
83	0.000721875
2268	0.000716043
429	0.000710159
487	0.000707322
729	0.000688193
2149	0.000686833
2277	0.000653951
245	0.000647631
2444	0.000642571
433	0.000633182
213	0.000632133
480	0.000625708
2762	0.000622533
2276	0.000619886
437	0.000619511
2250	0.000601607
749	0.000587304
2821	0.00058704
2235	0.000585621
426	0.000580402
1460	0.000548138
1322	0.000540516
2711	0.000520046
1537	0.000514453
191	0.000481622
475	0.000480161
772	0.000473187
1921	0.000467883
2189	0.000467063
307	0.000464189
759	0.000463171
806	0.000460646
2102	0.000458787
2446	0.000449672
249	0.000447807
883	0.000440591
1587	0.000434251
149	0.00043121
1141	0.000427684
1686	0.000426705
194	0.000423272
2836	0.000419925
2433	0.000417477
2738	0.000416816
2364	0.000415384
1315	0.00041146
2290	0.000411086
2397	0.00039908
813	0.000398052
114	0.000397129
316	0.000396838
87	0.000394294
787	0.00039128
2710	0.000384176
2592	0.000371289
2894	0.000371017
1579	0.000367258
684	0.000358294
466	0.000355325
1812	0.000354091
2898	0.000342076
758	0.000339289
2278	0.000337693
2837	0.000326606
478	0.000316819
788	0.000314458
2825	0.000308795
730	0.000305406
1560	0.000299553
1819	0.000299445
704	0.000299355
129	0.000296863
473	0.000294539
1823	0.000292531
6	0.000290447
1870	0.000288086
2403	0.000286043
2239	0.000281367
124	0.000280014
584	0.000271748
1758	0.000268724
1825	0.000268237
598	0.000264234
500	0.000259272
1200	0.000250085
2979	0.00024546
2708	0.000242909
1871	0.000240168
1741	0.000238129
686	0.000237162
2805	0.00023587
2431	0.000235652
1309	0.000234011
2209	0.000230202
1318	0.000224321
454	0.000223944
2627	0.000222588
1240	0.000218743
251	0.000218477
1663	0.000217432
1124	0.000207245
2771	0.000202265
169	0.000190953
1920	0.00019012
2709	0.000182344
1416	0.000180886
1771	0.000177954
39	0.000175082
2594	0.000173429
838	0.000172485
2225	0.000169316
762	0.00016555
425	0.000158098
1632	0.000153586
579	0.000152774
423	0.000148338
1747	0.000142582
1296	0.000141671
2228	0.000136495
2063	0.000135308
489	0.000131769
795	0.00012846
1421	0.000125919
2210	0.000121025
471	0.000120916
1659	0.000119315
2154	0.000118263
236	0.000117621
2194	0.000115721
1673	0.00010689
835	0.000105869
1554	0.000103661
2682	0.000101923
2670	0.000101534
2666	9.91962e-05
2246	9.87624e-05
107	9.74958e-05
1252	9.6156e-05
731	8.92127e-05
2672	8.82793e-05
1316	8.73454e-05
2399	8.66808e-05
966	8.59468e-05
2545	8.23975e-05
1199	8.21484e-05
1289	7.92053e-05
32	7.80515e-05
2227	7.68782e-05
2013	7.14965e-05
1578	6.85315e-05
1398	6.39626e-05
168	6.32102e-05
2055	6.26957e-05
2522	6.21032e-05
351	5.94329e-05
1312	5.83095e-05
2092	5.82523e-05
2032	5.82137e-05
368	5.74908e-05
529	5.57622e-05
2596	5.52635e-05
1139	5.45276e-05
1562	5.29934e-05
2832	5.24135e-05
1538	4.87417e-05
390	4.87028e-05
304	4.68099e-05
1473	4.59801e-05
1514	4.56777e-05
1297	4.51439e-05
295	4.50275e-05
746	4.47103e-05
435	4.36187e-05
1748	4.31993e-05
752	4.24101e-05
1588	4.1742e-05
2191	3.84013e-05
2829	3.7853e-05
1136	3.77674e-05
2400	3.61816e-05
2500	3.49959e-05
2152	3.47773e-05
1760	3.46459e-05
2234	3.43538e-05
2150	3.36075e-05
326	3.3389e-05
1164	3.33205e-05
302	3.30868e-05
396	3.301e-05
1084	3.19548e-05
602	3.15658e-05
2291	3.14533e-05
153	3.13537e-05
2318	3.004e-05
93	2.89239e-05
499	2.82897e-05
497	2.80385e-05
1754	2.76178e-05
449	2.68292e-05
215	2.60249e-05
240	2.58371e-05
4	2.56473e-05
2324	2.53106e-05
2542	2.51629e-05
170	2.41827e-05
1420	2.36007e-05
930	2.34922e-05
1688	2.19376e-05
1636	2.16246e-05
193	2.15777e-05
1839	2.1233e-05
518	2.0252e-05
1574	2.02325e-05
1320	2.00721e-05
1243	1.96674e-05
790	1.90966e-05
2084	1.78774e-05
2217	1.70712e-05
46	1.69706e-05
72	1.69378e-05
7	1.68928e-05
2668	1.67385e-05
694	1.66769e-05
1123	1.64281e-05
1751	1.63719e-05
1550	1.6355e-05
138	1.63055e-05
2769	1.62068e-05
1966	1.61926e-05
688	1.61654e-05
2662	1.60675e-05
406	1.58774e-05
360	1.58239e-05
2896	1.56808e-05
987	1.55486e-05
1598	1.54406e-05
63	1.51491e-05
1799	1.48693e-05
1288	1.4721e-05
17	1.46602e-05
2589	1.46201e-05
833	1.45487e-05
354	1.4524e-05
31	1.44059e-05
1157	1.43755e-05
465	1.39834e-05
1409	1.39653e-05
2840	1.3955e-05
2064	1.39251e-05
1193	1.34405e-05
283	1.34097e-05
450	1.33819e-05
71	1.33698e-05
929	1.31983e-05
1135	1.31595e-05
514	1.30314e-05
666	1.27706e-05
2090	1.27415e-05
2600	1.25327e-05
1744	1.24897e-05
785	1.2418e-05
1035	1.23138e-05
176	1.16482e-05
369	1.14716e-05
382	1.14594e-05
847	1.13863e-05
403	1.13356e-05
985	1.13325e-05
381	1.12715e-05
2707	1.11741e-05
216	1.10099e-05
1	1.0961e-05
2128	1.09428e-05
402	1.09013e-05
163	1.06813e-05
244	1.05155e-05
1447	1.04964e-05
323	1.04709e-05
768	1.03756e-05
237	1.03366e-05
1626	1.0284e-05
2398	1.02207e-05
33	1.02171e-05
1032	1.01249e-05
1009	1.01104e-05
2843	9.91668e-06
2248	9.8624e-06
399	9.83372e-06
2	9.73108e-06
2383	9.68831e-06
915	9.57215e-06
2633	9.42578e-06
2233	9.40251e-06
1023	9.38465e-06
51	9.30036e-06
1082	9.23153e-06
868	9.21953e-06
884	9.15531e-06
2539	9.13111e-06
115	9.04877e-06
177	9.03391e-06
345	8.82147e-06
495	8.81231e-06
1949	8.74755e-06
2325	8.62713e-06
23	8.5108e-06
1457	8.51047e-06
2455	8.46239e-06
2577	8.34964e-06
2270	8.23686e-06
1609	8.16478e-06
288	8.09201e-06
1739	8.06576e-06
2165	8.01903e-06
1397	7.97558e-06
637	7.88396e-06
158	7.78612e-06
1087	7.77745e-06
2890	7.71132e-06
1536	7.49364e-06
2130	7.49128e-06
774	7.47636e-06
2538	7.40901e-06
2830	7.38409e-06
2776	7.33285e-06
1165	7.27464e-06
1210	7.27273e-06
853	7.27197e-06
1947	7.18779e-06
922	7.12991e-06
2823	7.07734e-06
105	7.07158e-06
505	7.06596e-06
181	7.06493e-06
782	7.05755e-06
695	6.99968e-06
2842	6.98648e-06
126	6.96937e-06
3	6.96751e-06
618	6.95465e-06
1627	6.91735e-06
81	6.90891e-06
1952	6.89583e-06
1408	6.88431e-06
2527	6.87917e-06
185	6.79051e-06
1442	6.78601e-06
2555	6.73468e-06
1657	6.72066e-06
1385	6.63141e-06
1490	6.50063e-06
964	6.49213e-06
155	6.46059e-06
248	6.3687e-06
2016	6.36617e-06
1045	6.30692e-06
636	6.25788e-06
1081	6.19177e-06
20	6.0804e-06
828	5.98771e-06
145	5.96708e-06
195	5.94962e-06
2573	5.90898e-06
29	5.90044e-06
2089	5.8973e-06
2507	5.81961e-06
2508	5.72325e-06
1723	5.70329e-06
2406	5.69527e-06
2818	5.66881e-06
1710	5.66427e-06
2574	5.64284e-06
1208	5.62223e-06
2558	5.60327e-06
2663	5.54724e-06
917	5.52396e-06
613	5.51801e-06
578	5.48231e-06
2550	5.43731e-06
2220	5.39133e-06
946	5.38249e-06
585	5.35083e-06
939	5.23256e-06
313	5.17936e-06
1463	5.05039e-06
2506	5.01184e-06
2310	5.00162e-06
79	4.98732e-06
255	4.9863e-06
139	4.95681e-06
1007	4.93444e-06
1167	4.91127e-06
2316	4.89367e-06
5	4.80058e-06
1730	4.78651e-06
2609	4.76644e-06
1454	4.7526e-06
358	4.74371e-06
681	4.74231e-06
2241	4.73831e-06
385	4.71747e-06
2523	4.68877e-06
387	4.68415e-06
2477	4.67308e-06
2524	4.63606e-06
448	4.62655e-06
2295	4.62007e-06
340	4.58336e-06
933	4.56043e-06
1248	4.49926e-06
30	4.45785e-06
2879	4.44153e-06
761	4.41912e-06
2327	4.40035e-06
1452	4.39718e-06
1670	4.38021e-06
1054	4.36461e-06
525	4.31022e-06
1458	4.29507e-06
173	4.28442e-06
676	4.25482e-06
1606	4.25022e-06
875	4.22959e-06
2205	4.22437e-06
553	4.20214e-06
1928	4.15598e-06
257	4.12674e-06
357	4.10127e-06
963	4.0929e-06
2552	4.08615e-06
233	3.99926e-06
599	3.99242e-06
1745	3.98841e-06
2511	3.98247e-06
67	3.93416e-06
1815	3.93179e-06
18	3.91765e-06
2134	3.90137e-06
1424	3.89346e-06
2254	3.89023e-06
1919	3.8884e-06
2498	3.83223e-06
2585	3.80305e-06
2381	3.79064e-06
612	3.77853e-06
1286	3.73641e-06
552	3.72676e-06
524	3.70749e-06
201	3.70747e-06
1946	3.6324e-06
37	3.62762e-06
2660	3.62245e-06
2525	3.61614e-06
1547	3.58611e-06
2442	3.57547e-06
386	3.54946e-06
234	3.50296e-06
1284	3.4645e-06
134	3.45992e-06
2136	3.4518e-06
135	3.44016e-06
2067	3.42316e-06
398	3.41585e-06
2561	3.41328e-06
1701	3.4129e-06
1444	3.41111e-06
2892	3.405e-06
2315	3.40381e-06
1766	3.39755e-06
342	3.38234e-06
2437	3.38096e-06
394	3.37685e-06
496	3.36646e-06
2643	3.35954e-06
417	3.35585e-06
2601	3.35568e-06
1720	3.32086e-06
2038	3.28817e-06
1809	3.28064e-06
781	3.22416e-06
1542	3.21363e-06
1945	3.20092e-06
1399	3.16893e-06
864	3.15006e-06
314	3.14053e-06
2503	3.13604e-06
2641	3.13429e-06
259	3.1338e-06
2350	3.11814e-06
2230	3.06899e-06
401	3.06656e-06
2634	3.04075e-06
1513	3.03946e-06
498	3.02297e-06
262	3.01975e-06
986	3.00938e-06
1242	3.00578e-06
141	3.00131e-06
1545	2.96525e-06
1796	2.95577e-06
2252	2.93945e-06
305	2.93091e-06
850	2.93018e-06
28	2.92665e-06
292	2.91369e-06
2515	2.90165e-06
2537	2.87107e-06
1612	2.86277e-06
2161	2.85938e-06
1551	2.8303e-06
2582	2.82788e-06
2604	2.82611e-06
446	2.81841e-06
47	2.79487e-06
44	2.76637e-06
2644	2.75435e-06
1445	2.75322e-06
840	2.74786e-06
392	2.74762e-06
1400	2.70537e-06
2553	2.69749e-06
2878	2.69739e-06
317	2.67857e-06
2489	2.67462e-06
923	2.6693e-06
2549	2.65083e-06
989	2.64411e-06
2380	2.62484e-06
2669	2.62479e-06
2747	2.61948e-06
1797	2.5974e-06
2572	2.57919e-06
2505	2.51843e-06
214	2.50488e-06
376	2.44888e-06
373	2.44154e-06
2546	2.42147e-06
1722	2.42098e-06
2426	2.41902e-06
2578	2.39555e-06
544	2.37896e-06
82	2.37632e-06
1368	2.36764e-06
192	2.34574e-06
2548	2.33023e-06
1831	2.32629e-06
2565	2.32363e-06
2085	2.31101e-06
2579	2.29949e-06
2458	2.29895e-06
2569	2.29732e-06
69	2.27557e-06
1313	2.23295e-06
1651	2.22921e-06
293	2.22692e-06
846	2.22307e-06
2653	2.22236e-06
388	2.21866e-06
2564	2.2065e-06
2517	2.20546e-06
571	2.19742e-06
308	2.19607e-06
371	2.19203e-06
2170	2.1572e-06
635	2.13934e-06
2002	2.13431e-06
2171	2.13384e-06
1968	2.13228e-06
2864	2.13117e-06
554	2.12794e-06
1515	2.12419e-06
282	2.10161e-06
1617	2.09342e-06
2563	2.08834e-06
1451	2.08783e-06
2608	2.08769e-06
470	2.0835e-06
1580	2.08087e-06
180	2.08065e-06
2534	2.0762e-06
1798	2.0722e-06
2408	2.06904e-06
2551	2.05931e-06
2309	2.05307e-06
2803	2.01985e-06
2536	1.9971e-06
2547	1.989e-06
1736	1.98119e-06
952	1.97856e-06
2532	1.97215e-06
217	1.96796e-06
113	1.9614e-06
2218	1.94425e-06
2056	1.94001e-06
1642	1.9308e-06
809	1.91607e-06
2543	1.90923e-06
2457	1.89791e-06
1057	1.89676e-06
355	1.88926e-06
596	1.88886e-06
2581	1.83788e-06
2575	1.82624e-06
43	1.82623e-06
2598	1.8165e-06
2659	1.81515e-06
1640	1.80631e-06
2401	1.80068e-06
2294	1.79466e-06
98	1.79233e-06
2313	1.77928e-06
238	1.76548e-06
1597	1.73151e-06
2560	1.71856e-06
685	1.71013e-06
2815	1.70481e-06
154	1.69293e-06
347	1.67517e-06
968	1.65588e-06
1140	1.65213e-06
881	1.63005e-06
1287	1.61379e-06
2514	1.61299e-06
1525	1.60356e-06
1836	1.59841e-06
2655	1.59505e-06
2203	1.57757e-06
2516	1.56941e-06
161	1.54417e-06
2867	1.52586e-06
1431	1.52374e-06
2186	1.50295e-06
2188	1.50069e-06
1172	1.49142e-06
389	1.4811e-06
160	1.48056e-06
1605	1.47689e-06
66	1.47285e-06
488	1.46716e-06
455	1.46234e-06
1207	1.46043e-06
2763	1.45853e-06
1063	1.43735e-06
1489	1.43639e-06
802	1.42275e-06
2694	1.417e-06
1295	1.39577e-06
2491	1.3771e-06
294	1.36925e-06
2260	1.36674e-06
2559	1.35268e-06
2377	1.34856e-06
572	1.34802e-06
2859	1.34605e-06
1096	1.34179e-06
2529	1.3264e-06
2221	1.32479e-06
2258	1.30555e-06
1249	1.30048e-06
136	1.28167e-06
247	1.2548e-06
70	1.24732e-06
1948	1.2473e-06
2509	1.21373e-06
1029	1.20529e-06
159	1.19511e-06
2606	1.19192e-06
1711	1.18905e-06
1795	1.18858e-06
1746	1.16871e-06
918	1.16237e-06
1698	1.16139e-06
551	1.15882e-06
2212	1.14577e-06
1030	1.14254e-06
2793	1.1333e-06
1206	1.13025e-06
2386	1.12074e-06
969	1.1198e-06
687	1.11809e-06
1658	1.11699e-06
2554	1.11159e-06
2719	1.10569e-06
162	1.10103e-06
290	1.09839e-06
526	1.0975e-06
1540	1.08423e-06
2510	1.08388e-06
1787	1.07509e-06
1742	1.07243e-06
1593	1.06932e-06
2533	1.05605e-06
439	1.04178e-06
2535	1.04018e-06
2348	1.03463e-06
1607	1.03206e-06
2571	1.02894e-06
2289	1.02552e-06
2476	1.01363e-06
2610	9.85304e-07
2232	9.82968e-07
1237	9.59546e-07
125	9.53072e-07
2207	9.49472e-07
2384	9.47324e-07
2359	9.36333e-07
1539	9.35711e-07
2456	9.278e-07
1158	9.24193e-07
1257	9.0108e-07
2599	8.89099e-07
2184	8.88628e-07
143	8.76902e-07
1448	8.69746e-07
1942	8.65623e-07
1036	8.57809e-07
2409	8.49671e-07
2512	8.42808e-07
254	8.41666e-07
516	8.35163e-07
1660	8.23964e-07
638	8.18016e-07
1017	8.16346e-07
2213	8.04704e-07
1715	8.04576e-07
261	8.03459e-07
530	7.98501e-07
1373	7.96874e-07
1714	7.77705e-07
2153	7.59659e-07
2863	7.5014e-07
804	7.48945e-07
1159	7.44572e-07
1674	7.22446e-07
1716	7.22328e-07
2438	7.21823e-07
1697	7.20597e-07
1684	7.16531e-07
2541	7.11413e-07
2148	7.05307e-07
112	7.02888e-07
2540	6.95815e-07
187	6.81188e-07
2482	6.75312e-07
2813	6.70692e-07
2175	6.68586e-07
2147	6.64952e-07
2502	6.47918e-07
1613	6.44971e-07
1769	5.99627e-07
2160	5.95249e-07
1051	5.6975e-07
235	5.65517e-07
919	5.63293e-07
2501	5.49352e-07
1453	5.37862e-07
1256	5.24273e-07
2475	5.12525e-07
1260	5.12355e-07
1668	5.07335e-07
2567	4.96669e-07
2307	4.80759e-07
2588	4.66319e-07
2407	4.45426e-07
377	4.44197e-07
2528	4.20287e-07
2100	4.03076e-07
2402	3.94496e-07
197	3.80104e-07
628	3.74675e-07
2521	3.70107e-07
198	3.69669e-07
1775	3.68651e-07
1443	3.66279e-07
2530	3.58141e-07
1719	3.48043e-07
405	3.41578e-07
1492	3.38317e-07
1718	3.36459e-07
1923	3.31486e-07
366	3.15877e-07
2283	3.09627e-07
1259	3.00272e-07
610	2.94687e-07
2468	2.87438e-07
515	2.52399e-07
2251	2.33753e-07
2557	2.13155e-07
914	1.94285e-07
2183	1.73333e-07
2937	0
2059	0
2993	0
2949	0
1905	0
1907	0
2097	0
2062	0
2945	0
1906	0
2946	0
1934	0
1902	0
2947	0
2095	0
2948	0
1903	0
2936	0
1933	0
2096	0
2093	0
1931	0
1929	0
1904	0
2094	0
1922	0
1908	0
2082	0
2072	0
2073	0
2074	0
2075	0
2939	0
2940	0
1925	0
1915	0
1916	0
2070	0
1924	0
1917	0
2076	0
2941	0
1918	0
2080	0
2079	0
2078	0
2071	0
2069	0
2944	0
2087	0
1909	0
2994	0
2091	0
1910	0
2943	0
2938	0
2942	0
2088	0
1911	0
2068	0
2066	0
2996	0
1912	0
2077	0
1913	0
1926	0
1914	0
2083	0
2086	0
1979	0
2058	0
1969	0
2968	0
2000	0
2001	0
2981	0
2003	0
2982	0
2983	0
2967	0
2004	0
1972	0
2966	0
2005	0
1971	0
1970	0
2984	0
1999	0
2985	0
2006	0
1965	0
2965	0
2986	0
2008	0
2964	0
2988	0
2963	0
2010	0
2011	0
2989	0
1964	0
1963	0
2969	0
2970	0
1962	0
1977	0
1980	0
1981	0
1982	0
1983	0
1984	0
1985	0
1986	0
1987	0
1988	0
2098	0
1989	0
1990	0
2980	0
1978	0
2978	0
1998	0
1991	0
2977	0
1976	0
2976	0
1992	0
2974	0
1993	0
2973	0
1994	0
2972	0
1995	0
2971	0
1996	0
1997	0
2012	0
2014	0
2057	0
1940	0
2957	0
2956	0
2040	0
2041	0
2042	0
2043	0
2044	0
2045	0
2046	0
2047	0
1941	0
2955	0
2048	0
2049	0
2050	0
1950	0
1939	0
2051	0
1938	0
2052	0
1937	0
2954	0
2053	0
2953	0
2952	0
2951	0
1936	0
2054	0
2950	0
1935	0
1944	0
2958	0
1961	0
2026	0
1960	0
1959	0
2962	0
2018	0
1957	0
2019	0
2961	0
1956	0
2020	0
2021	0
2022	0
2023	0
2024	0
2025	0
2990	0
2037	0
2027	0
1955	0
1954	0
2991	0
2028	0
2029	0
2960	0
2031	0
2959	0
2033	0
2992	0
2034	0
2035	0
2036	0
1943	0
2247	0
2099	0
2845	0
2372	0
2370	0
2369	0
2368	0
2366	0
2365	0
2844	0
2362	0
2374	0
2361	0
2846	0
2360	0
2357	0
2356	0
2355	0
2847	0
2373	0
2375	0
2101	0
2824	0
2812	0
2814	0
2816	0
2817	0
2819	0
2820	0
2822	0
2826	0
2379	0
2827	0
2828	0
2833	0
2835	0
2385	0
2839	0
2841	0
2848	0
2849	0
2349	0
2856	0
2852	0
2329	0
2853	0
2854	0
2328	0
2326	0
2855	0
2857	0
2850	0
2323	0
2858	0
2320	0
2865	0
2866	0
2868	0
2869	0
2330	0
2331	0
2332	0
2333	0
2347	0
2851	0
2346	0
2345	0
2344	0
2343	0
2342	0
2341	0
2340	0
2339	0
2338	0
2337	0
2336	0
2335	0
2334	0
2810	0
2809	0
2808	0
2664	0
2654	0
2656	0
2570	0
2657	0
2658	0
2562	0
2556	0
2665	0
2679	0
2674	0
2675	0
2526	0
2676	0
2519	0
2518	0
2677	0
2652	0
2650	0
2649	0
2648	0
2615	0
2614	0
2626	0
2611	0
2636	0
2637	0
2607	0
2638	0
2602	0
2640	0
2642	0
2645	0
2646	0
2586	0
2647	0
2678	0
2504	0
2804	0
2765	0
2741	0
2742	0
2746	0
2751	0
2752	0
2753	0
2755	0
2779	0
2680	0
2781	0
2782	0
2785	0
2787	0
2791	0
2792	0
2794	0
2736	0
2731	0
2471	0
2729	0
2681	0
2683	0
2684	0
2685	0
2686	0
2691	0
2695	0
2696	0
2699	0
2700	0
2701	0
2702	0
1900	0
2706	0
2718	0
2304	0
2303	0
2302	0
2159	0
2173	0
2169	0
2168	0
2922	0
2164	0
2923	0
2162	0
2158	0
2142	0
2155	0
2924	0
2151	0
2925	0
2146	0
2145	0
2144	0
2921	0
2174	0
2176	0
2177	0
2913	0
2914	0
2915	0
2916	0
2192	0
2917	0
2190	0
2918	0
2187	0
2919	0
2920	0
2182	0
2180	0
2179	0
2178	0
2143	0
2141	0
2909	0
2932	0
2112	0
2111	0
2110	0
2109	0
2929	0
2930	0
2931	0
2108	0
2140	0
2933	0
2107	0
2934	0
2935	0
2105	0
2104	0
2103	0
2113	0
2114	0
2928	0
2117	0
2139	0
2138	0
2137	0
2135	0
2926	0
2132	0
2131	0
2129	0
2127	0
2927	0
2126	0
2121	0
2120	0
2119	0
2118	0
2911	0
2196	0
2870	0
2274	0
2885	0
2887	0
2888	0
2889	0
2891	0
2893	0
2275	0
2273	0
2259	0
2895	0
2271	0
2269	0
2267	0
2265	0
2264	0
2263	0
2884	0
2883	0
2881	0
2880	0
2299	0
2298	0
2871	0
2297	0
2296	0
2293	0
2292	0
2872	0
2873	0
2874	0
2876	0
2877	0
2285	0
2284	0
2282	0
2261	0
2257	0
2198	0
2905	0
2902	0
2903	0
2216	0
2215	0
2214	0
2211	0
2904	0
2906	0
2255	0
2206	0
2204	0
2202	0
2908	0
2201	0
2200	0
2199	0
2219	0
2901	0
2222	0
2223	0
2253	0
2616	0
2245	0
2244	0
2243	0
2242	0
2238	0
2236	0
2231	0
2229	0
2897	0
2899	0
2226	0
2900	0
2224	0
1901	0
1533	0
1899	0
905	0
902	0
900	0
899	0
897	0
896	0
895	0
894	0
892	0
891	0
890	0
889	0
887	0
882	0
880	0
879	0
878	0
877	0
876	0
870	0
867	0
866	0
863	0
862	0
861	0
860	0
859	0
858	0
903	0
906	0
955	0
907	0
953	0
951	0
950	0
949	0
948	0
947	0
945	0
944	0
943	0
942	0
941	0
938	0
937	0
936	0
935	0
934	0
932	0
931	0
928	0
925	0
924	0
916	0
912	0
911	0
910	0
909	0
908	0
857	0
856	0
854	0
852	0
620	0
619	0
617	0
616	0
615	0
614	0
609	0
608	0
607	0
606	0
605	0
604	0
603	0
601	0
600	0
597	0
594	0
593	0
592	0
591	0
589	0
587	0
586	0
582	0
581	0
577	0
576	0
621	0
622	0
623	0
706	0
851	0
845	0
843	0
842	0
836	0
825	0
814	0
797	0
792	0
789	0
757	0
753	0
701	0
624	0
697	0
690	0
639	0
634	0
633	0
632	0
631	0
630	0
629	0
627	0
626	0
625	0
954	0
956	0
574	0
1079	0
1077	0
1076	0
1075	0
1074	0
1073	0
1072	0
1071	0
1070	0
1069	0
1068	0
1067	0
1066	0
1065	0
1064	0
1062	0
1061	0
1060	0
1059	0
1058	0
1056	0
1055	0
1052	0
1050	0
1049	0
1048	0
1047	0
1046	0
1078	0
1080	0
957	0
1083	0
1113	0
1112	0
1111	0
1110	0
1109	0
1108	0
1107	0
1106	0
1105	0
1104	0
1103	0
1102	0
1101	0
1100	0
1099	0
1098	0
1097	0
1095	0
1094	0
1093	0
1092	0
1091	0
1090	0
1089	0
1088	0
1086	0
1085	0
1044	0
1043	0
1042	0
1041	0
997	0
996	0
995	0
993	0
992	0
991	0
990	0
984	0
983	0
982	0
981	0
980	0
979	0
978	0
977	0
976	0
975	0
974	0
973	0
972	0
971	0
970	0
967	0
965	0
962	0
959	0
958	0
998	0
999	0
1000	0
1018	0
1039	0
1038	0
1037	0
1034	0
1033	0
1028	0
1027	0
1026	0
1022	0
1021	0
1020	0
1019	0
1016	0
1001	0
1015	0
1014	0
1013	0
1012	0
1011	0
1010	0
1008	0
1006	0
1005	0
1004	0
1003	0
1002	0
575	0
573	0
1115	0
225	0
221	0
220	0
219	0
218	0
212	0
211	0
210	0
209	0
208	0
207	0
205	0
204	0
203	0
202	0
199	0
189	0
188	0
186	0
184	0
183	0
182	0
179	0
175	0
174	0
172	0
171	0
167	0
222	0
226	0
296	0
227	0
287	0
286	0
285	0
284	0
281	0
280	0
279	0
278	0
277	0
276	0
275	0
274	0
273	0
272	0
271	0
270	0
269	0
268	0
267	0
266	0
265	0
264	0
260	0
246	0
231	0
230	0
228	0
166	0
165	0
148	0
142	0
65	0
64	0
62	0
61	0
60	0
59	0
58	0
57	0
56	0
55	0
54	0
53	0
52	0
50	0
49	0
48	0
[truncated: 657 more rows]

## Sheet: SHAP_All_Endotypes
GEM Reaction index	SHAP_mean_Endotype_A	SHAP_mean_Endotype_B	SHAP_mean_Endotype_C	SHAP_mean_Endotype_D
1	6.02845e-06	8.65507e-06	2.93274e-05	1.0961e-05
2	1.02919e-05	3.95732e-06	7.66695e-06	9.73108e-06
3	2.50741e-06	4.15312e-06	2.21656e-05	6.96751e-06
4	1.15671e-05	3.06914e-05	0.000410423	2.56473e-05
5	8.3759e-06	0	1.14336e-06	4.80058e-06
6	2.18171e-05	6.70938e-07	1.89629e-05	0.000290447
7	4.35455e-06	1.79575e-06	5.50237e-06	1.68928e-05
16	0.0763392	0.0179408	0.00531516	0.18534
17	2.8316e-06	4.0337e-06	1.48026e-05	1.46602e-05
18	8.83421e-06	2.98973e-06	2.41207e-05	3.91765e-06
19	0	0	0	0
20	1.09493e-06	3.06575e-07	5.81375e-06	6.0804e-06
22	0	0	0	0
23	2.10388e-06	5.44095e-07	9.61172e-06	8.5108e-06
24	0	0	0	0
25	0	0	0	0
26	0	0	0	0
27	0	0	0	0
28	1.70806e-05	1.24933e-06	4.7408e-06	2.92665e-06
29	3.09446e-06	1.35762e-06	1.7031e-06	5.90044e-06
30	2.74316e-05	1.03399e-06	1.01461e-05	4.45785e-06
31	2.472e-05	5.43226e-06	6.1368e-06	1.44059e-05
32	0.404411	4.60645e-07	0.0108438	7.80515e-05
33	2.03969e-06	6.83163e-06	2.90644e-06	1.02171e-05
34	0	0	0	0
35	0	0	0	0
36	0	0	0	0
37	7.97721e-06	3.17634e-06	3.39488e-06	3.62762e-06
38	0	0	0	0
39	0.000332477	0	4.10121e-06	0.000175082
41	0.00509591	0.0554565	0.0126869	0.0157972
42	0	0	0	0
43	1.34555e-06	6.42451e-07	5.66602e-06	1.82623e-06
44	7.02724e-07	2.80361e-06	5.53134e-06	2.76637e-06
45	0.00516964	0.00175779	0.000873838	0.00354723
46	3.4661e-05	1.31128e-05	7.80137e-06	1.69706e-05
47	2.41113e-06	1.09309e-06	2.89734e-06	2.79487e-06
48	0	0	0	0
49	0	0	0	0
50	0	0	0	0
51	4.61459e-06	0	4.8235e-06	9.30036e-06
52	0	0	0	0
53	0	0	0	0
54	0	0	0	0
55	0	0	0	0
56	0	0	0	0
57	0	0	0	0
58	0	0	0	0
59	0	0	0	0
60	0	0	0	0
61	0	0	0	0
62	0	0	0	0
63	2.31869e-06	4.0267e-06	6.19914e-06	1.51491e-05
64	0	0	0	0
65	0	0	0	0
66	6.86126e-07	2.5503e-06	4.49752e-06	1.47285e-06
67	3.87851e-06	9.24917e-07	1.02969e-06	3.93416e-06
69	5.61294e-06	2.70983e-06	1.23949e-06	2.27557e-06
70	4.00788e-06	5.28115e-06	2.54092e-06	1.24732e-06
71	4.44268e-06	1.81394e-05	1.30618e-05	1.33698e-05
72	2.73962e-06	4.13077e-06	7.0046e-05	1.69378e-05
73	0	0	0	0
74	0	0	0	0
75	0.0347867	0.00249964	0.00301545	0.057998
76	0.00384518	0.000528932	0.000409671	0.00939874
77	0	0	0	0
78	0	0	0	0
79	4.22936e-06	1.2259e-06	4.36559e-06	4.98732e-06
80	0	0	0	0
81	3.51774e-06	0	8.10056e-07	6.90891e-06
82	2.22535e-06	8.8706e-07	9.68466e-06	2.37632e-06
83	0.00120782	0.0258834	0.00154157	0.000721875
84	1.87067e-05	0.0165322	0.00273955	0.00270751
85	0.00402341	0.0403288	0.0359643	0.134634
86	0.0319392	5.20849e-05	0.000205255	0.00634007
87	0.0012126	0.000405197	0.00325282	0.000394294
88	4.22546e-05	6.53789e-05	0.00275167	0.0319272
89	0.306866	0.0433558	0.00422529	0.00227943
90	0	0	0	0
91	0	0	0	0
93	7.10671e-07	1.59529e-06	0.000168435	2.89239e-05
94	0	0	0	0
95	0	0	0	0
96	0.0301192	0.00017322	0.0120253	0.0024562
97	0	0	0	0
98	2.8048e-07	9.25687e-07	1.15026e-06	1.79233e-06
99	0	0	0	0
100	0	0	0	0
101	0	0	0	0
102	0	0	0	0
103	0	0	0	0
104	0	0	0	0
105	1.39717e-06	0	1.12305e-06	7.07158e-06
106	0.000839475	0.000519329	0.0208685	0.00301017
107	1.17442e-05	0.00221136	0.000422603	9.74958e-05
108	0.0100132	0.000122823	0.000794342	0.000766876
109	0	0	0	0
110	0	0	0	0
111	0	0	0	0
112	1.05399e-06	2.87634e-06	1.39593e-05	7.02888e-07
113	5.03781e-06	3.20938e-07	7.46319e-06	1.9614e-06
114	0.0010635	9.06643e-05	0.00182429	0.000397129
115	2.68773e-05	5.44436e-07	7.0766e-06	9.04877e-06
116	0	0	0	0
117	0	0	0	0
118	0	0	0	0
119	0	0	0	0
120	0	0	0	0
121	0	0	0	0
122	0.00885565	2.39706e-05	0.00230198	0.00211596
123	0	0	0	0
124	0.00323624	4.96723e-06	0.00058651	0.000280014
125	9.03939e-07	8.15156e-07	1.81422e-06	9.53072e-07
126	4.11129e-06	3.44063e-06	3.93022e-06	6.96937e-06
127	0	0	0	0
128	0	0	0	0
129	0.00533573	2.35265e-06	0.000339415	0.000296863
130	0.0085304	8.75157e-05	2.67402e-05	0.00318872
131	0.00140438	0.00397359	0.00215187	0.0175784
132	0.000344527	6.90581e-07	1.16666e-05	0.00268683
133	0	0	0	0
134	4.02925e-06	4.70081e-06	1.21189e-05	3.45992e-06
135	2.12296e-06	1.29118e-05	1.48536e-05	3.44016e-06
136	3.70473e-07	1.28957e-06	1.28914e-06	1.28167e-06
137	0	0	0	0
138	1.23899e-05	7.55053e-06	1.30446e-05	1.63055e-05
139	4.04521e-06	4.65724e-06	1.09096e-06	4.95681e-06
140	0.000123332	3.56209e-05	0.000224012	0.00130052
141	7.14486e-06	3.42496e-05	5.35045e-06	3.00131e-06
142	0	0	0	0
143	4.60887e-07	3.97218e-06	7.61996e-06	8.76902e-07
145	0	2.61297e-06	1.84027e-06	5.96708e-06
148	0	0	0	0
149	7.67995e-05	0	0	0.00043121
150	0.00485477	0.00327843	0.0275585	0.00203423
151	0.00188782	0.00981552	0.000490503	0.0157027
152	0.00237866	0.000479849	0.00463433	0.0013358
153	3.86889e-07	1.26006e-06	0.000212459	3.13537e-05
154	6.53235e-06	3.13832e-06	1.29388e-07	1.69293e-06
155	4.2349e-07	5.33714e-06	2.61631e-06	6.46059e-06
156	9.63255e-05	0.0263981	0.0602106	0.0039885
157	0.000728427	0.001681	0.00980679	0.0075623
158	1.20274e-06	7.21669e-06	2.86514e-06	7.78612e-06
159	9.80432e-07	0	6.38627e-06	1.19511e-06
160	2.68016e-06	4.96514e-07	2.10414e-06	1.48056e-06
161	5.79202e-06	0	2.87449e-07	1.54417e-06
162	8.57203e-06	4.55062e-06	2.59041e-06	1.10103e-06
163	8.76666e-07	2.29647e-06	2.69365e-06	1.06813e-05
164	6.96039e-05	8.52293e-06	8.10483e-06	0.0251968
165	0	0	0	0
166	0	0	0	0
167	0	0	0	0
168	7.20602e-06	4.69564e-07	3.27971e-05	6.32102e-05
169	0.0107304	1.34727e-06	0.025059	0.000190953
170	9.8711e-06	6.20459e-06	2.84257e-06	2.41827e-05
171	0	0	0	0
172	0	0	0	0
173	1.86897e-06	0	1.7762e-06	4.28442e-06
174	0	0	0	0
175	0	0	0	0
176	6.56287e-05	7.58137e-07	2.43143e-05	1.16482e-05
177	0	1.88995e-06	2.69844e-05	9.03391e-06
179	0	0	0	0
180	3.07693e-07	9.81507e-07	4.44921e-06	2.08065e-06
181	3.45247e-06	3.95115e-07	1.88277e-06	7.06493e-06
182	0	0	0	0
183	0	0	0	0
184	0	0	0	0
185	1.89269e-05	2.79519e-06	5.27509e-06	6.79051e-06
186	0	0	0	0
187	1.13926e-06	4.24211e-07	2.38498e-07	6.81188e-07
188	0	0	0	0
189	0	0	0	0
191	0.034525	4.38446e-05	0.000865971	0.000481622
192	2.42208e-06	2.88928e-06	3.46242e-07	2.34574e-06
193	1.26557e-05	1.53323e-06	5.72048e-06	2.15777e-05
194	0.000915113	0.00449246	0.0042311	0.000423272
195	1.34047e-06	1.22007e-06	1.06125e-06	5.94962e-06
196	0.00238314	0.00103703	0.00130358	0.0242428
197	1.60865e-06	0	2.38018e-06	3.80104e-07
198	2.8676e-06	6.14646e-07	1.92345e-06	3.69669e-07
199	0	0	0	0
200	0.0015819	0.492485	0.00244856	0.00113375
201	9.94535e-06	3.17466e-06	1.58903e-05	3.70747e-06
202	0	0	0	0
203	0	0	0	0
204	0	0	0	0
205	0	0	0	0
207	0	0	0	0
208	0	0	0	0
209	0	0	0	0
210	0	0	0	0
211	0	0	0	0
212	0	0	4.35183e-06	0
213	0.00355919	5.70254e-06	0.000738548	0.000632133
214	2.06993e-07	3.43987e-07	3.16387e-06	2.50488e-06
215	5.59675e-06	0	1.1839e-05	2.60249e-05
216	1.0639e-06	2.15405e-07	2.22326e-06	1.10099e-05
217	1.08891e-05	1.46193e-05	5.36338e-06	1.96796e-06
218	0	0	0	0
219	0	0	0	0
220	0	0	0	0
221	0	0	0	0
222	0	0	0	0
223	0.0019777	0.000258451	0.000303806	0.00121643
224	0.000337563	0.000167366	0.00237433	0.0753141
225	0	0	0	0
226	0	0	0	0
227	0	0	0	0
228	0	0	0	0
229	5.59461e-05	5.36156e-06	2.09588e-05	0.18461
230	0	0	0	0
231	0	0	0	0
232	0.0587806	3.57315e-05	0.0034729	0.000988664
233	2.65404e-06	3.68334e-06	2.86319e-06	3.99926e-06
234	5.32244e-06	0	1.1786e-05	3.50296e-06
235	5.74415e-06	5.67107e-07	5.7969e-07	5.65517e-07
236	1.88631e-05	3.08681e-05	1.1399e-05	0.000117621
237	3.12652e-07	0	1.36731e-05	1.03366e-05
238	6.05917e-06	0	5.76259e-07	1.76548e-06
239	4.44052e-06	1.57682e-06	2.09076e-06	0.0547283
240	2.17408e-05	0	5.37874e-07	2.58371e-05
244	1.9988e-05	5.35208e-07	2.78274e-06	1.05155e-05
245	3.67083e-05	0	0	0.000647631
246	0	0	0	0
247	1.50314e-06	4.63798e-07	3.03571e-06	1.2548e-06
248	3.34771e-06	1.48773e-05	8.98567e-06	6.3687e-06
249	0.0105471	5.964e-07	4.4874e-05	0.000447807
250	0.0211391	0.00332294	0.0934052	0.0212856
251	0.000857669	2.28872e-05	2.17946e-05	0.000218477
253	0.00169542	0.00930617	0.0772324	0.0291511
254	0.000449576	0	2.13129e-05	8.41666e-07
255	3.65602e-06	0	2.1486e-06	4.9863e-06
256	0.00102288	0.00939086	0.00233811	0.00371903
257	3.03633e-06	6.91275e-07	1.09099e-05	4.12674e-06
258	0.000594995	0.108646	0.039679	0.013141
259	1.74773e-06	0	3.85524e-06	3.1338e-06
260	0	0	0	0
261	1.13534e-06	0	1.39734e-06	8.03459e-07
262	7.40656e-07	1.03326e-05	2.88397e-06	3.01975e-06
263	0.00537073	0.000570112	0.00486486	0.000931488
264	4.27311e-06	8.47108e-07	2.16074e-06	0
265	0	0	0	0
266	0	0	0	0
267	0	0	0	0
268	0	0	0	0
269	0	0	0	0
270	0	0	0	0
271	0	0	0	0
272	0	0	0	0
273	0	0	0	0
274	0	0	0	0
275	0	0	0	0
276	0	0	0	0
277	0	0	0	0
278	0	0	0	0
279	0	0	0	0
280	0	0	0	0
281	0	0	0	0
282	1.90424e-06	0	1.21345e-06	2.10161e-06
283	4.53019e-06	2.00924e-06	2.81935e-06	1.34097e-05
284	0	0	0	0
285	0	0	0	0
286	0	0	0	0
287	0	0	0	0
288	2.85354e-06	3.49899e-06	1.88472e-06	8.09201e-06
289	0.000159561	0.000111021	0.000941046	0.0408846
290	1.11982e-06	1.4411e-06	3.52115e-06	1.09839e-06
291	0	0	0	0
292	7.12734e-07	2.04636e-07	7.37084e-06	2.91369e-06
293	1.00328e-06	6.87118e-07	7.2006e-07	2.22692e-06
294	3.51966e-07	1.84589e-06	7.98188e-07	1.36925e-06
295	1.09328e-05	2.34785e-06	6.71587e-06	4.50275e-05
296	0	0	0	0
297	0	0	0	0
298	0.000255857	0.000242038	0.010493	0.0189124
300	0.00537872	0.0102258	0.000701553	0.0110539
301	0.000414527	0.00244133	0.00020007	0.0027844
302	1.30388e-05	2.82284e-06	3.55156e-06	3.30868e-05
304	5.74674e-06	3.00815e-07	2.61087e-05	4.68099e-05
305	5.35169e-06	0	4.06302e-06	2.93091e-06
306	0.00253535	0.00383855	0.000323996	0.00090342
307	0.00365781	1.50463e-05	0.000110725	0.000464189
308	0	0	3.98819e-06	2.19607e-06
309	0	0	0	0
310	0	0	0	0
311	0.00521948	8.54511e-05	0.157882	0.00246419
312	0	0	0	0
313	6.3335e-06	1.10724e-06	8.82929e-06	5.17936e-06
314	1.58606e-06	7.02003e-06	7.03676e-06	3.14053e-06
315	0.00702866	0.0022243	0.00210331	0.000921255
316	0.00221681	0.000244966	0.00116695	0.000396838
317	7.86502e-06	3.33181e-07	2.22611e-06	2.67857e-06
318	0	0	0	0
319	0	0	0	0
320	0	0	0	0
321	0	0	0	0
322	0	0	0	0
323	3.21682e-06	1.02989e-06	3.62461e-07	1.04709e-05
324	0	0	0	0
325	0	0	0	0
326	1.38811e-05	9.26116e-07	2.9345e-06	3.3389e-05
327	0	0	0	0
328	0	0	0	0
329	1.39994e-05	5.86432e-06	9.51386e-05	0.0415982
330	0	0	0	0
331	0	0	0	0
332	0	0	0	0
333	0	0	0	0
334	0	0	0	0
335	0	0	0	0
337	0	0	0	0
338	0	0	0	0
339	0	0	0	0
340	6.08513e-06	3.1684e-06	2.44944e-06	4.58336e-06
341	0	0	0	0
342	2.73975e-06	0	1.666e-05	3.38234e-06
343	0.000228899	0.000188263	0.0450475	0.00685771
344	0.000737268	0.132629	0.00302379	0.024249
345	4.76237e-06	3.66866e-06	4.72301e-06	8.82147e-06
346	0	0	0	0
347	1.00373e-06	5.27517e-06	1.70344e-06	1.67517e-06
348	0	0	0	0
349	0	0	0	0
350	0.000599365	0.000221292	0.000219989	0.0114962
351	4.50338e-05	1.47705e-05	5.74086e-06	5.94329e-05
352	0.000321092	0.000764132	0.00147719	0.0139572
353	0	0	0	0
354	1.21246e-06	1.09746e-06	6.29566e-06	1.4524e-05
355	0	0	1.50607e-06	1.88926e-06
356	0	0	0	0
357	3.10028e-07	0	2.51683e-06	4.10127e-06
358	1.68694e-05	0	4.88192e-06	4.74371e-06
359	0	0	0	0
360	6.14236e-06	3.92227e-05	1.2433e-05	1.58239e-05
361	4.13687e-06	2.63899e-05	1.20936e-06	0
362	0	0	0	0
363	1.79753e-05	1.66036e-05	3.1213e-05	0.000777266
364	0.00155355	0.000120105	0.00481108	0.0132238
365	0.00288301	6.39887e-05	0.00226922	0.00141495
366	7.5411e-06	0	1.00857e-05	3.15877e-07
367	0	0	0	0
368	8.13657e-06	0.000103728	8.35172e-05	5.74908e-05
369	0	0	2.88862e-05	1.14716e-05
370	0	0	0	0
371	4.67268e-06	1.84945e-06	3.32848e-07	2.19203e-06
372	0	0	0	0
373	4.08141e-06	6.32268e-07	2.82589e-06	2.44154e-06
375	0.00487723	6.11677e-05	0.00254234	0.00159519
376	5.09907e-07	4.49501e-07	1.47238e-06	2.44888e-06
377	2.69531e-06	6.89599e-07	7.82722e-07	4.44197e-07
378	0.0018259	0.00470387	0.00570899	0.000893679
379	0.000769009	0.000245403	0.00163891	0.00345618
380	0	0	0	0
381	7.43614e-06	5.19077e-07	5.52542e-06	1.12715e-05
382	1.19046e-05	2.2507e-06	3.08214e-05	1.14594e-05
383	0.048806	0.00278463	0.00738748	0.00175362
385	4.22988e-06	9.91632e-07	4.60917e-06	4.71747e-06
386	1.71281e-06	0	1.24595e-06	3.54946e-06
387	1.77919e-06	0	1.63396e-07	4.68415e-06
388	0	8.44025e-07	4.45701e-05	2.21866e-06
389	0	0	6.00264e-06	1.4811e-06
390	6.45194e-06	0	1.1955e-06	4.87028e-05
391	0	0	0	0
392	8.64096e-07	0	4.25046e-06	2.74762e-06
393	0	0	0	0
394	9.68427e-07	0	2.44065e-06	3.37685e-06
395	0	0	0	0
396	2.48329e-05	3.78021e-06	2.38099e-06	3.301e-05
397	0	0	0	0
398	0	3.23771e-06	2.38168e-06	3.41585e-06
399	2.68203e-06	0	0	9.83372e-06
401	3.22709e-05	0	3.84412e-06	3.06656e-06
402	4.1794e-06	6.72352e-07	8.41658e-07	1.09013e-05
403	2.66806e-07	0	0	1.13356e-05
404	0.000441399	0.00265037	0.00268359	0.0027932
405	2.51422e-06	0	1.9229e-06	3.41578e-07
406	1.8136e-06	0	2.32662e-06	1.58774e-05
407	0	0	0	0
408	0	0	0	0
409	0	0	0	0
410	0	0	0	0
411	0	0	0	0
412	0	0	0	0
413	0	0	0	0
414	0.0017742	0.00172068	0.0614282	0.00122991
415	0.00135655	7.41394e-05	0.0039898	0.00170252
416	0.00578035	0.00398989	0.00978092	0.00305065
417	0	1.12669e-06	1.44327e-06	3.35585e-06
418	0	0	0	0
419	0	0	0	0
420	0	0	0	0
421	0	0	0	0
422	0	0	0	0
423	0.250075	5.49095e-06	0.000941412	0.000148338
424	0	0	0	0
425	0	0	0	0.000158098
426	0.0016573	0.000496118	0.0784153	0.000580402
427	0	0	0	0
428	0	0	0	0
429	0.000108952	0	0	0.000710159
430	0	0	0	0
431	0.000415419	0	0	0.00290695
432	0	0	0	0
433	2.30981e-05	0	0	0.000633182
434	0	0	0	0
435	8.37074e-05	0	0	4.36187e-05
436	0	0	0	0
437	6.69251e-05	0	0	0.000619511
438	0	0	0	0
439	3.13854e-06	1.29606e-06	4.36272e-06	1.04178e-06
440	0	0	0	0
441	0	0	0	0
442	0	0	0	0
443	0	0	0	0
444	0	0	0	0
445	0	0	0	0
446	9.11323e-07	9.38333e-07	8.0849e-06	2.81841e-06
447	0.0328257	0.000542423	0.000362644	0.00457505
448	3.46359e-06	3.83676e-06	6.76111e-06	4.62655e-06
449	5.23752e-07	6.73621e-07	0	2.68292e-05
450	1.76796e-06	1.19761e-06	1.99629e-06	1.33819e-05
451	0	0	0	0
452	0.00028553	0	2.20825e-06	0.00243598
453	0	0	0	0
454	8.8659e-06	0.0282517	2.60355e-05	0.000223944
455	1.60585e-05	1.11586e-06	9.25414e-07	1.46234e-06
456	0	0	0	0
457	0.00168962	0.000103668	0.224041	0.182023
458	0.000442398	0.000342917	0.00220372	0.00154545
459	0	0	0	0
460	3.36888e-05	0.0508161	0.230235	0.00392261
462	0.00461024	0.284721	0.00126918	0.0142046
463	0	0	0	0
464	0.000166282	3.57707e-05	0.0877942	0.199448
465	8.01263e-06	1.83316e-05	1.67646e-05	1.39834e-05
466	0.136102	0.00221867	0.00120732	0.000355325
470	1.25649e-06	0	2.21405e-06	2.0835e-06
471	0.000105052	0.000134109	7.68865e-05	0.000120916
472	0	0	0	0
473	0.0439398	2.2262e-05	0.000229017	0.000294539
474	0	0	0	0
475	0.0210761	1.67174e-05	0.000119734	0.000480161
476	0	0	0	0
477	0	0	0	0
478	0.000220035	0.000190564	0.0015803	0.000316819
479	0.00681184	0.000605076	0.19069	0.0276564
480	0.0232344	0.520433	0.00531488	0.000625708
482	0	0	0	0
483	0	0	0	0
484	0	0	0	0
485	0	0	0	0
486	0	0	0	0
487	1.63023e-05	1.41098e-05	0.000108854	0.000707322
488	3.87961e-06	1.68766e-06	1.31625e-06	1.46716e-06
489	0	0	1.35175e-06	0.000131769
490	0	0	0	0
491	0	0	0	0
492	0	0	0	0
493	0.000537768	6.50072e-05	0.000238105	0.103133
495	4.33136e-06	0	1.32403e-06	8.81231e-06
496	2.9952e-05	0	5.08127e-06	3.36646e-06
497	8.7492e-07	6.7061e-06	7.91929e-06	2.80385e-05
498	1.2036e-05	2.91007e-07	4.12158e-06	3.02297e-06
499	2.49347e-05	1.60663e-06	7.41487e-06	2.82897e-05
500	6.18884e-06	1.24393e-05	3.99003e-06	0.000259272
501	0	0	0	0
502	0	0	0	0
503	0	0	0	0
504	0	0	0	0
505	1.42799e-06	1.04016e-06	0	7.06596e-06
506	0	0	0	0
507	0	0	0	0
508	0	0	0	0
509	0	0	0	0
510	0	0	0	0
513	0	0	0	0
514	4.04123e-06	0	2.24425e-05	1.30314e-05
515	2.05261e-06	7.1789e-07	1.39356e-06	2.52399e-07
516	8.13735e-06	6.8631e-07	6.89442e-06	8.35163e-07
517	0	0	0	0
518	1.34189e-05	1.97258e-05	1.32164e-05	2.0252e-05
519	0	0	0	0
522	0	0	0	0
523	0	0	0	0
524	3.65331e-07	8.5404e-07	2.90366e-06	3.70749e-06
525	2.68686e-05	7.3564e-06	7.49825e-06	4.31022e-06
526	2.05375e-05	5.96527e-07	6.71472e-06	1.0975e-06
527	0	0	0	0
528	0	0	0	0
529	9.52311e-06	0.00131471	1.30114e-05	5.57622e-05
530	5.03824e-06	0	2.34988e-06	7.98501e-07
531	8.5195e-06	1.88127e-06	1.50685e-06	0.000725751
532	0	0	0	0
533	0	0	0	0
534	0.135184	0.117951	0.022357	0.078427
535	0.00190087	0.011636	0.00211311	0.0273753
536	0.000203132	0.00385535	0.000597001	0.00498187
544	2.44056e-07	0	9.77318e-06	2.37896e-06
545	0	0	0	0
546	0	0	0	0
547	0	0	0	0
548	0	0	0	0
549	0	0	0	0
550	0	0	0	0
551	1.99404e-06	2.7151e-07	2.47325e-06	1.15882e-06
552	4.2503e-07	0	3.6092e-06	3.72676e-06
553	7.18774e-07	0	4.57127e-06	4.20214e-06
554	3.18701e-06	0	2.5943e-06	2.12794e-06
555	0	0	0	0
556	0	0	0	0
557	0	0	0	0
558	0	0	0	0
559	0	0	0	0
560	0	0	0	0
561	0	0	0	0
562	0	0	0	0
563	0	0	0	0
564	0	0	0	0
565	0	0	0	0
566	0	0	0	0
567	0	0	0	0
568	0	0	0	0
569	0	0	0	0
570	0	0	0	0
571	6.10154e-07	2.80173e-06	1.73439e-05	2.19742e-06
572	2.1955e-05	9.46777e-06	1.64449e-05	1.34802e-06
573	0	0	0	0
574	0	0	0	0
575	0	0	0	0
576	0	0	0	0
577	0	0	0	0
578	1.6811e-05	0	2.83209e-06	5.48231e-06
579	0.000124608	0	0.000275317	0.000152774
580	0.000957034	0.00455293	0.0041844	0.00103712
581	0	0	0	0
582	0	0	0	0
583	0.000232079	4.88945e-05	7.75013e-05	0.00211268
584	3.61558e-05	1.2957e-06	1.80588e-05	0.000271748
585	2.5151e-06	1.1036e-06	1.44893e-06	5.35083e-06
586	0	0	0	0
587	0	0	0	0
588	0.000525267	0.000406123	0.000982878	0.00622596
589	0	0	0	0
590	0.000409102	0.000329166	0.0329368	0.00153978
591	0	0	0	0
592	0	0	0	0
593	0	0	0	0
594	0	0	0	0
595	6.77449e-05	0.00251642	0.00269439	0.0268148
596	2.06695e-06	6.08617e-06	4.01947e-06	1.88886e-06
597	0	0	0	0
598	0.00158836	0.0960476	0.000295475	0.000264234
599	2.65879e-06	2.52082e-07	2.20791e-06	3.99242e-06
600	0	0	0	0
601	0	0	0	0
602	1.67012e-05	4.6927e-06	1.70443e-05	3.15658e-05
603	0	0	0	0
604	0	0	0	0
605	0	0	0	0
606	0	0	0	0
607	0	0	0	0
608	0	0	0	0
609	0	0	0	0
610	0	1.48741e-06	1.74906e-06	2.94687e-07
611	0.00942172	0.000205849	1.90467e-05	0.00264863
612	1.1511e-05	0	1.06021e-06	3.77853e-06
613	1.57126e-06	4.28316e-06	8.2275e-07	5.51801e-06
614	0	0	0	0
615	0	0	0	0
616	0	0	0	0
617	0	0	0	0
618	1.28457e-05	0	2.82639e-06	6.95465e-06
619	0	0	0	0
620	0	0	0	0
621	0	0	0	0
622	0	0	0	0
623	0	0	0	0
624	0	0	0	0
625	0	0	0	0
626	0	0	0	0
627	0	0	0	0
628	0	0	7.15467e-07	3.74675e-07
629	0	0	0	0
630	0	0	0	0
631	0	0	0	0
632	0	0	0	0
633	0	0	0	0
634	0	0	0	0
635	3.13293e-06	0	1.71163e-06	2.13934e-06
636	7.88512e-06	1.17218e-06	1.4709e-05	6.25788e-06
637	6.56413e-06	8.20968e-06	5.34924e-06	7.88396e-06
638	0	0	0	8.18016e-07
639	0	0	0	0
666	2.0045e-06	0	2.85171e-06	1.27706e-05
675	0.00261789	0	2.94149e-06	0.0028795
676	5.8418e-06	3.16103e-06	1.20658e-05	4.25482e-06
678	1.90547e-05	4.48615e-07	2.42181e-05	0.0200052
681	0.00164171	1.4438e-05	1.33119e-05	4.74231e-06
684	5.5431e-06	8.50227e-06	1.31396e-06	0.000358294
685	1.06409e-06	3.04927e-07	5.24351e-06	1.71013e-06
686	0.0061652	8.92774e-07	1.42624e-06	0.000237162
687	2.41633e-06	0	2.9834e-06	1.11809e-06
688	1.25507e-05	1.02926e-05	2.32089e-05	1.61654e-05
690	0	0	0	0
694	0	0	1.19664e-05	1.66769e-05
695	9.06124e-07	5.49795e-07	2.46057e-06	6.99968e-06
697	0	0	0	0
701	0	0	0	0
704	0.000154888	0	0	0.000299355
706	0	0	0	0
710	0.000827545	1.59679e-05	6.40072e-06	0.00333736
729	0.000233331	0	0	0.000688193
730	0.00139281	0.000146204	0.000296278	0.000305406
731	6.68148e-05	2.88174e-05	0.000156035	8.92127e-05
746	0.000111904	3.18851e-05	3.69469e-05	4.47103e-05
749	3.70633e-05	0	0	0.000587304
752	0.000371578	4.64244e-07	5.86139e-06	4.24101e-05
753	0	0	0	0
755	0.0146844	0.00101847	0.0498086	0.0023343
757	0	0	0	0
758	5.21487e-05	0	2.12296e-06	0.000339289
759	0.00140488	0	1.09774e-06	0.000463171
760	8.30299e-05	0	6.48425e-07	0.00156302
761	3.60245e-06	1.38722e-06	7.95252e-06	4.41912e-06
762	0.000432232	0	0	0.00016555
765	9.00292e-05	4.04675e-05	1.5625e-06	0.00134656
766	1.64036e-05	3.9512e-06	3.33328e-06	0.0118737
768	1.25833e-06	8.37888e-06	6.87464e-05	1.03756e-05
770	0.000128767	0.00439925	0.000350532	0.00614066
772	0.000219336	0	7.9376e-07	0.000473187
774	2.76815e-05	0	2.15879e-06	7.47636e-06
781	4.50578e-07	0	1.0973e-06	3.22416e-06
782	2.09778e-06	1.33645e-05	1.55131e-06	7.05755e-06
785	1.19324e-06	6.41164e-07	0	1.2418e-05
787	2.728e-05	0	0	0.00039128
788	0.000193723	0	0	0.000314458
789	0	0	0	0
790	9.10274e-06	2.0928e-06	2.47593e-05	1.90966e-05
792	0	0	0	0
795	0.000144688	0	2.21633e-06	0.00012846
796	0.00143545	6.03741e-06	4.27634e-06	0.00512533
797	0	0	0	0
802	1.57329e-05	1.46838e-06	1.69611e-05	1.42275e-06
804	9.07517e-07	1.45657e-06	5.60841e-07	7.48945e-07
806	0.00106889	0.00219602	0.000394479	0.000460646
809	4.06451e-06	0	1.97689e-06	1.91607e-06
813	4.00123e-05	0	9.25603e-07	0.000398052
814	0	0	0	0
820	0.000525532	0	0	0.000792414
822	0.000968444	0	0	0.0021713
823	2.36996e-06	3.20349e-06	1.72933e-06	0.0498061
825	0	0	0	0
828	3.18478e-05	5.75324e-06	7.19704e-06	5.98771e-06
833	4.57682e-06	0	6.3454e-06	1.45487e-05
835	2.70169e-06	3.57543e-06	1.56215e-05	0.000105869
836	0	0	0	0
838	0.000112064	0	1.20794e-06	0.000172485
840	2.86311e-06	0	4.76024e-07	2.74786e-06
842	0	0	0	0
843	0	0	0	0
844	0.00326718	0.000454059	0.00124537	0.000815882
845	0	0	0	0
846	4.38862e-06	0	0	2.22307e-06
847	8.79624e-06	6.73756e-06	2.59024e-06	1.13863e-05
848	2.495e-05	1.10647e-06	2.71091e-05	0.0170189
849	0.00132803	0.00252217	0.000617007	0.00944963
850	6.56629e-06	1.72837e-06	1.17183e-05	2.93018e-06
851	0	0	0	0
852	0	0	0	0
853	0	0	8.4112e-07	7.27197e-06
854	0	0	0	0
856	0	0	0	0
857	0	0	0	0
858	0	0	0	0
859	0	0	0	0
860	0	0	0	0
861	0	0	0	0
862	0	0	0	0
863	0	0	0	0
864	5.57196e-06	2.83889e-07	1.20703e-06	3.15006e-06
865	0.0118487	0.0109786	0.0404924	0.125773
866	0	0	0	0
867	0	0	0	0
868	2.72062e-05	7.11287e-06	0.000213124	9.21953e-06
870	0	0	0	0
875	0	1.82852e-07	3.04537e-06	4.22959e-06
876	0	0	0	0
877	0	0	0	0
878	0	0	0	0
879	0	0	0	0
880	0	0	0	0
881	0	4.74813e-06	2.25552e-06	1.63005e-06
882	0	0	0	0
883	5.96845e-05	5.71276e-06	1.29932e-05	0.000440591
884	2.9734e-06	5.03011e-07	6.29319e-06	9.15531e-06
885	0.000337112	1.95534e-05	0.000708517	0.272483
886	8.34582e-06	0.000146254	8.43942e-06	0.00177021
887	0	0	0	0
888	0	0	2.44347e-05	0.0015593
889	0	0	0	0
890	0	0	0	0
891	0	0	0	0
892	0	0	0	0
893	1.31029e-06	1.62282e-06	3.57035e-05	0.0798005
894	0	0	0	0
895	0	0	0	0
896	0	0	0	0
897	0	0	0	0
898	4.72618e-06	6.53442e-06	5.50204e-06	0.0113754
899	0	0	0	0
900	0	0	0	0
902	0	0	0	0
903	0	0	0	0
905	0	0	0	0
906	0	0	0	0
907	0	0	0	0
908	0	0	0	0
909	0	0	0	0
910	0	0	0	0
911	0	0	0	0
912	0	0	0	0
914	1.94719e-06	1.46772e-06	4.3631e-06	1.94285e-07
915	9.07576e-05	0	7.45731e-05	9.57215e-06
916	0	0	0	0
917	5.31904e-06	2.56831e-06	3.76996e-06	5.52396e-06
918	3.331e-06	1.48013e-05	3.72237e-06	1.16237e-06
919	2.23139e-06	6.27896e-07	2.3409e-06	5.63293e-07
920	0.000301295	0.00237674	0.00213455	0.00519422
921	0.00059172	0.0345128	0.00336938	0.0153516
922	7.89703e-07	0	3.87578e-06	7.12991e-06
923	2.98476e-06	3.23644e-06	9.19235e-07	2.6693e-06
924	0	0	0	0
925	0	0	0	0
926	0.000678664	0.00219757	0.0161236	0.00129591
927	0.00482823	0.00101588	0.00329171	0.0163958
928	0	0	0	0
929	8.46383e-06	0	4.70554e-06	1.31983e-05
930	0.000329977	7.25605e-06	8.92318e-06	2.34922e-05
931	0	0	0	0
932	0	0	0	0
933	4.40965e-06	0	1.49741e-06	4.56043e-06
934	0	0	0	0
935	0	0	0	0
936	0	0	0	0
937	0	0	0	0
938	0	0	0	0
939	6.66503e-06	6.65938e-05	6.51997e-06	5.23256e-06
940	0.101918	0.00186347	0.00128655	0.00101196
941	4.41197e-06	2.40978e-06	5.74316e-06	0
942	0	0	0	0
943	0	0	0	0
944	0	0	0	0
945	0	0	0	0
946	3.21403e-06	6.31218e-06	7.88556e-06	5.38249e-06
947	0	0	0	0
948	0	0	0	0
949	0	0	0	0
950	0	0	0	0
951	0	0	0	0
952	3.23876e-06	1.08326e-06	2.75844e-06	1.97856e-06
953	0	0	0	0
954	0	0	0	0
955	0	0	0	0
956	0	0	0	0
957	0	0	0	0
958	0	0	0	0
959	0	0	0	0
960	0.0326991	0.0176389	0.00860161	0.015191
961	0.000108552	0.00366838	0.00836774	0.0198539
962	0	0	0	0
963	3.0097e-06	1.5854e-05	6.76733e-05	4.0929e-06
964	2.55683e-06	0	5.46397e-06	6.49213e-06
965	0	0	0	0
966	0.000213953	1.95459e-05	4.85359e-05	8.59468e-05
967	0	0	0	0
968	4.74747e-05	5.67212e-07	2.5336e-06	1.65588e-06
969	8.50569e-07	1.332e-06	0	1.1198e-06
970	0	0	0	0
971	0	0	0	0
972	0	0	0	0
973	0	0	0	0
974	0	0	0	0
975	0	0	0	0
976	0	0	0	0
977	0	0	0	0
978	0	0	0	0
979	0	0	0	0
980	0	0	0	0
981	0	0	0	0
982	0	0	0	0
983	0	0	0	0
984	0	0	0	0
985	1.83603e-06	7.89107e-06	3.14031e-06	1.13325e-05
986	1.89187e-06	3.48721e-07	8.94173e-06	3.00938e-06
987	4.9463e-05	0	7.54841e-07	1.55486e-05
988	1.77644e-05	7.37276e-05	0.00523438	0.0120744
989	0	4.39283e-07	1.02041e-05	2.64411e-06
990	0	0	0	0
991	0	0	0	0
992	0	0	0	0
993	0	0	0	0
994	0.000394675	0.0367944	0.0247047	0.029597
995	0	0	0	0
996	0	0	0	0
997	0	0	0	0
998	0	0	0	0
999	0	0	0	0
1000	0	0	0	0
1001	0	0	0	0
1002	0	0	0	0
1003	0	0	0	0
1004	0	0	0	0
1005	0	0	0	0
1006	0	0	0	0
1007	0	5.08063e-07	5.23945e-07	4.93444e-06
1008	0	0	0	0
1009	4.08152e-07	0	2.7839e-06	1.01104e-05
1010	0	0	0	0
1011	0	0	0	0
1012	0	0	0	0
1013	0	0	0	0
1014	0	0	0	0
1015	0	0	0	0
1016	0	0	0	0
1017	3.19566e-06	0	3.74384e-07	8.16346e-07
1018	0	0	0	0
1019	0	0	0	0
1020	0	0	0	0
1021	0	0	0	0
1022	0	0	0	0
1023	3.11498e-06	8.71748e-06	6.44217e-06	9.38465e-06
1024	0.00135949	0	3.27982e-05	0.00164387
1025	0.000933881	0	0	0.00162202
1026	0	0	0	0
1027	0	0	0	0
1028	0	0	0	0
1029	3.58693e-06	0	1.28579e-05	1.20529e-06
1030	2.95268e-06	9.97487e-07	3.66292e-06	1.14254e-06
1032	0	0	1.33679e-06	1.01249e-05
1033	0	0	0	0
1034	0	0	0	0
1035	0	0	4.90943e-07	1.23138e-05
1036	9.12431e-07	0	3.45345e-07	8.57809e-07
1037	0	0	0	0
1038	0	0	0	0
1039	0	0	0	0
1040	0.000481682	0.000244919	0.000208294	0.00164433
1041	0	0	0	0
1042	0	0	0	0
1043	0	0	0	0
1044	0	0	0	0
1045	5.5225e-05	1.68583e-06	2.47162e-06	6.30692e-06
1046	0	0	0	0
1047	0	0	0	0
1048	0	0	0	0
1049	0	0	0	0
1050	0	0	0	0
1051	1.22662e-06	1.36841e-06	5.47405e-06	5.6975e-07
1052	0	0	0	0
1053	0.000820679	0.00164493	0.000942803	0.0100644
1054	1.54146e-06	1.15222e-06	1.07228e-06	4.36461e-06
1055	0	0	0	0
1056	0	0	0	0
1057	3.07729e-06	1.41954e-06	2.20032e-06	1.89676e-06
1058	0	0	0	0
1059	0	0	0	0
1060	0	0	0	0
1061	0	0	0	0
1062	0	0	0	0
1063	3.69643e-06	5.1797e-07	2.04748e-06	1.43735e-06
1064	0	0	0	0
1065	0	0	0	0
1066	0	0	0	0
1067	0	0	0	0
1068	0	0	0	0
1069	0	0	0	0
1070	0	0	0	0
1071	0	0	0	0
1072	0	0	0	0
1073	0	0	0	0
1074	0	0	0	0
1075	0	0	0	0
1076	0	0	0	0
1077	0	0	0	0
1078	0	0	0	0
1079	0	0	0	0
1080	0	0	0	0
1081	2.41265e-06	9.05043e-07	0	6.19177e-06
1082	0	2.20229e-06	1.2201e-06	9.23153e-06
1083	0	0	0	0
1084	3.45219e-05	6.16248e-06	7.30887e-05	3.19548e-05
1085	0	0	0	0
1086	0	0	0	0
1087	1.01947e-06	2.37017e-06	1.59841e-06	7.77745e-06
1088	0	0	0	0
1089	0	0	0	0
1090	0	0	0	0
1091	0	0	0	0
1092	0	0	0	0
1093	0	0	0	0
1094	0	0	0	0
1095	0	0	0	0
1096	0	0	6.53381e-06	1.34179e-06
1097	0	0	0	0
1098	0	0	0	0
1099	0	0	0	0
1100	0	0	0	0
1101	0	0	0	0
1102	0	0	0	0
1103	0	0	0	0
1104	0	0	0	0
1105	0	0	0	0
1106	0	0	0	0
1107	0	0	0	0
1108	0	0	0	0
1109	0	0	0	0
1110	0	0	0	0
1111	0	0	0	0
1112	0	0	0	0
1113	0	0	0	0
1114	0	0	0	0
1115	0	0	0	0
1116	0	0	0	0
1117	0	0	0	0
1118	0	0	0	0
1119	0	0	0	0
1120	0	0	0	0
1121	0	0	0	0
1122	0	0	0	0
1123	0.000709221	2.40195e-06	1.28844e-05	1.64281e-05
1124	3.95973e-06	4.04698e-05	0.000338202	0.000207245
1125	0	0	0	0
1126	0	0	0	0
1127	0	0	0	0
1128	0	0	0	0
1129	0	0	0	0
1130	0.00182319	0.307102	0.00475404	0.14394
1131	0	0	0	0
1132	0	0	0	0
1133	0	0	0	0
1134	0	0	0	0
1135	1.92077e-06	8.52625e-07	8.94625e-06	1.31595e-05
1136	1.59781e-06	7.05655e-07	9.73794e-06	3.77674e-05
1137	0	0	0	0
1138	0	0	0	0
1139	5.87338e-06	0	5.49101e-06	5.45276e-05
1140	1.79183e-06	4.29615e-07	1.56736e-06	1.65213e-06
1141	2.81105e-05	6.2963e-05	8.72343e-05	0.000427684
1142	0	0	0	0
1143	9.08635e-05	0.000369836	0.000553139	0.00282253
1144	0	0	0	0
1145	0	0	0	0
1146	0	0	0	0
1148	0	0	0	0
1149	0.000197716	0.000509862	9.42952e-05	0.0012437
1150	0	0	0	0
1151	0	0	0	0
1152	0	0	0	0
1153	0	0	0	0
1154	0	0	0	0
1155	0	0	0	0
1156	0	0	0	0
1157	1.31154e-06	4.83652e-06	6.49394e-06	1.43755e-05
1158	0	1.82043e-06	1.97003e-06	9.24193e-07
1159	0	0	1.26507e-06	7.44572e-07
1160	0.0190498	0.00138594	0.00917884	0.0168728
1161	0.00430801	5.10958e-05	0.0037685	0.00117907
1163	0.000392011	0.2141	0.219006	0.107655
1164	1.19169e-05	7.58778e-06	2.13117e-05	3.33205e-05
1165	6.93766e-06	0	1.86262e-06	7.27464e-06
1167	9.43934e-06	3.80117e-07	2.58766e-06	4.91127e-06
1168	0	0	0	0
1169	0	0	0	0
1170	0	0	0	0
1171	0	0	0	0
1172	0	0	3.95144e-05	1.49142e-06
1173	0	0	0	0
1174	0	0	0	0
1175	0	0	0	0
1176	0	0	0	0
1177	0	0	0	0
1178	0	0	0	0
1179	0	0	0	0
1180	0	0	0	0
1181	0	0	0	0
1182	0	0	0	0
1183	0	0	0	0
1184	0	0	0	0
1185	0.438206	0.00120297	0.00129157	0.0069951
1186	0	0	0	0
1187	0	0	0	0
1188	0	0	0	0
1189	0.0596231	0.0445808	0.000683363	0.00634964
1190	0	0	0	0
1191	0	0	0	0
1192	0	0	0	0
1193	1.8776e-05	5.39229e-06	4.11068e-05	1.34405e-05
1195	0	0	0	0
1196	0	0	0	0
1197	0	0	0	0
1198	0	0	0	0
1199	0.0101507	1.41779e-05	3.66847e-05	8.21484e-05
1200	0.0529079	8.2155e-06	1.37971e-05	0.000250085
1201	3.32397e-05	0.000831485	0.0662253	0.0390954
1202	0.000301242	0.034917	0.000715575	0.0471711
1203	0	0	0	0
1204	0	0	0	0
1205	0	0	0	0
1206	2.94662e-06	4.89338e-07	2.34445e-06	1.13025e-06
1207	5.51127e-06	1.38712e-05	4.10714e-06	1.46043e-06
1208	1.50755e-06	6.90634e-07	9.34124e-06	5.62223e-06
1210	1.75013e-05	1.65988e-06	1.57624e-05	7.27273e-06
1211	0.000759414	0.000254029	0.00071409	0.00196752
1212	0	0	0	0
1213	8.52931e-05	7.20961e-05	0.000877301	0.00141832
1214	0	0	0	0
1215	0	0	0	0
1216	0	0	0	0
1217	0	0	0	0
1218	0	0	0	0
1219	0	0	0	0
1220	0	0	0	0
1221	0	0	0	0
1222	0	0	0	0
1223	0	0	0	0
1224	0	0	0	0
1225	0	0	0	0
1226	0	0	0	0
1227	0	0	0	0
1228	0	0	0	0
1229	0	0	0	0
1230	0	0	0	0
1231	0.00071844	1.39581e-05	9.31917e-05	0.00227322
1232	0	0	0	0
1233	4.53949e-06	9.22438e-05	0.00128701	0.00418509
1234	0.524703	0.00182986	0.00357824	0.00236824
1235	0	0	0	0
1236	0	0	0	0
1237	7.91627e-07	3.78361e-06	0	9.59546e-07
1238	0	0	0	0
1239	0	0	0	0
1240	2.66709e-06	8.61729e-07	0.000153985	0.000218743
1241	0	0	0	0
1242	1.03073e-05	5.53126e-06	1.15344e-05	3.00578e-06
1243	3.58109e-06	7.92599e-06	2.37666e-05	1.96674e-05
1244	0	0	0	0
1245	0	0	0	0
1246	0	0	0	0
1247	0	0	0	0
1248	2.22133e-06	0	3.36623e-06	4.49926e-06
1249	1.4825e-05	4.62453e-06	1.81072e-06	1.30048e-06
1250	0.00201661	0.00187382	0.00504304	0.00104071
1251	0	0	0	0
1252	2.40103e-05	0	2.0432e-05	9.6156e-05
1253	0	0	0	0
1254	0	0	0	0
1255	0.00051167	0.00464849	0.00279879	0.00181413
1256	6.11568e-06	6.57985e-07	1.00802e-05	5.24273e-07
1257	1.86324e-06	1.50051e-06	5.90724e-06	9.0108e-07
1258	0	0	0	0
1259	2.90339e-06	6.38446e-06	0	3.00272e-07
1260	1.02039e-06	3.29721e-06	2.78293e-06	5.12355e-07
1261	0	0	0	0
1262	0	0	0	0
1263	0	0	0	0
1264	0	0	0	0
1265	0	0	0	0
1266	0	0	0	0
1267	0	0	0	0
1268	0	0	0	0
1269	0	0	0	0
1270	0	0	0	0
1271	0	0	0	0
1272	0	0	0	0
1273	0	0	0	0
1274	0	0	0	0
1275	0	0	0	0
1276	0	0	0	0
1277	0	0	0	0
1278	0	0	0	0
1279	0.000155141	2.85064e-05	0.000178636	0.000861364
1280	0	0	0	0
1281	0	0	0	0
1282	0	0	0	0
1284	0	3.04218e-06	2.01257e-06	3.4645e-06
1285	0	0	0	0
1286	8.25431e-07	7.95479e-07	8.58327e-07	3.73641e-06
1287	4.07715e-07	0	3.88715e-06	1.61379e-06
1288	2.77764e-06	0	1.13207e-06	1.4721e-05
1289	0.000131793	9.52484e-07	3.0674e-06	7.92053e-05
1290	0	0	0	0
1291	0	0	0	0
1292	0	0	0	0
1293	0.00555452	8.19874e-06	7.41909e-07	0.0208121
1294	0	0	0	0
1295	0	0	1.05878e-06	1.39577e-06
1296	3.9209e-06	0	1.37325e-05	0.000141671
1297	0.00634481	1.23408e-05	9.19463e-06	4.51439e-05
1298	0.00132623	0.037363	0.073862	0.0596749
1299	0.0188268	0.0188325	0.029551	0.00237644
1300	0	0	0	0
1301	0	0	0	0
1302	0	0	0	0
1303	0	0	0	0
1304	0	0	0	0
1305	0	0	0	0
1306	0	0	0	0
1307	0	0	0	0
1308	0	0	0	0
1309	0.00229872	1.75953e-05	0.000425833	0.000234011
1310	0	0	0	0
1311	0	0	0	0
1312	0.000413118	1.62426e-06	4.04675e-06	5.83095e-05
1313	4.11747e-06	0	5.29803e-07	2.23295e-06
1314	0.000386782	0.00651549	0.00269656	0.00350354
1315	0.000201854	0.0118667	0.145221	0.00041146
1316	1.53211e-06	0	1.29624e-06	8.73454e-05
1317	0	0	0	0
1318	0.000896857	0.00052117	0.000993939	0.000224321
1319	0.000132016	0.185621	0.00114957	0.00491207
1320	9.93512e-07	1.73543e-06	1.19686e-05	2.00721e-05
1321	6.5697e-05	5.75028e-05	0.00474454	0.00118832
1322	5.99035e-05	0.0745117	0.000266076	0.000540516
1323	0	0	0	0
1324	0	0	0	0
1325	0	0	0	0
1326	0	0	0	0
1327	0	0	0	0
1328	0	0	0	0
1329	0	0	0	0
1330	0	0	0	0
1331	0	0	0	0
1332	0	0	0	0
1333	0	0	0	0
1334	0.421476	0.00010844	0.00147016	0.0739357
1335	0	0	0	0
1336	0	0	0	0
1337	9.80337e-06	2.39495e-06	7.11167e-07	0
1338	0.00476908	8.36709e-05	7.80912e-05	0.0369043
1339	0	0	0	0
1340	0	0	0	0
1341	0	0	0	0
1342	0	0	0	0
1343	0	0	0	0
1344	0	0	0	0
1345	0	0	0	0
1346	0	0	0	0
1347	0	0	0	0
1348	1.99185e-06	0	9.32206e-07	0.00163614
1349	0	0	0	0
1350	0	0	0	0
1351	0	0	0	0
1352	0	0	0	0
1353	0	0	0	0
1354	0	0	0	0
1355	0	0	0	0
1356	0	0	0	0
1357	0	0	0	0
1358	0	0	0	0
1359	0	0	0	0
1360	0	0	0	0
1361	0	0	0	0
1362	0	0	0	0
1363	0	0	0	0
1364	0	0	0	0
1365	0	0	0	0
1366	0	0	0	0
1367	0	0	0	0
1368	4.07806e-07	0	7.6062e-05	2.36764e-06
1369	0	0	0	0
1370	0	0	0	0
1371	0	0	0	0
1372	0	0	0	0
1373	1.31288e-06	0	1.65436e-06	7.96874e-07
1374	0	0	0	0
1375	0	0	0	0
1376	0	0	0	0
1377	0	0	0	0
1378	0	0	0	0
1380	0	0	0	0
1381	0	0	0	0
1382	5.68997e-05	1.65943e-05	0.000207596	0.00466175
1383	0	0	0	0
1384	0	0	0	0
1385	3.56919e-05	6.77234e-06	4.73822e-05	6.63141e-06
1386	0.0103299	0.00672235	0.224013	0.0161662
1387	0	0	0	0
1388	0	0	0	0
1389	0	0	0	0
1390	0	0	0	0
1391	0	0	0	0
1392	0	0	0	0
1393	0	0	0	0
1394	0	0	0	0
1395	0	0	0	0
1396	0	0	0	0
1397	4.58125e-06	0	2.49799e-06	7.97558e-06
1398	2.59572e-05	3.26282e-06	2.75574e-06	6.39626e-05
1399	8.37606e-07	3.55438e-07	6.58695e-06	3.16893e-06
1400	1.45067e-06	0	1.12411e-06	2.70537e-06
1401	0	0	0	0
1402	0	0	0	0
1404	0	0	0	0
1405	0	0	0	0
1406	0	0	0	0
1407	0	0	0	0
1408	1.878e-06	7.89151e-07	5.73129e-06	6.88431e-06
1409	7.42128e-07	2.94928e-06	1.97373e-06	1.39653e-05
1410	0	0	0	0
1411	0	0	0	0
1412	0	0	0	0
1413	0	0	0	0
1414	0	0	0	0
1415	0	0	0	0
1416	0.111688	9.85173e-05	0.000699151	0.000180886
1418	0	0	0	0
1419	0.00105526	0.000140152	0.103628	0.26479
1420	2.31299e-05	1.41133e-06	1.81934e-05	2.36007e-05
1421	0.00199899	0.000350648	0.000598577	0.000125919
1422	0	0	0	0
1423	0	0	0	0
1424	5.96668e-07	8.39415e-07	1.87485e-06	3.89346e-06
1425	0	0	0	0
1426	0	0	0	0
1427	0	0	0	0
1428	0	0	0	0
1429	0	0	0	0
1430	0	0	0	0
1431	2.19645e-06	6.96095e-06	8.89061e-07	1.52374e-06
1432	0	0	0	0
1433	0	0	0	0
1434	0	0	0	0
1436	0	0	0	0
1437	0.00060181	0.00243861	0.00202972	0.00250834
1438	0.000361183	0.002859	0.00029468	0.0138661
1439	0	0	0	0
1440	0	0	0	0
1441	0	0	0	0
1442	3.48683e-06	9.30074e-06	2.14949e-06	6.78601e-06
1443	1.38858e-06	0	7.19148e-06	3.66279e-07
1444	4.63016e-05	1.62156e-06	5.1883e-06	3.41111e-06
1445	8.39399e-06	9.22992e-06	5.24555e-06	2.75322e-06
1446	0	0	0	0
1447	1.39888e-05	4.89477e-07	2.82973e-06	1.04964e-05
1448	6.80784e-07	0	1.76631e-06	8.69746e-07
1449	0	0	0	0
1450	0	0	0	0
1451	3.97823e-06	2.59713e-06	2.79495e-06	2.08783e-06
1452	8.08769e-07	3.43554e-06	1.16095e-06	4.39718e-06
1453	3.2691e-07	0	3.90791e-06	5.37862e-07
1454	2.29154e-06	4.18505e-06	2.29436e-06	4.7526e-06
1455	0	0	0	0
1456	0	0	0	0
1457	1.21909e-06	1.52896e-06	7.6328e-06	8.51047e-06
1458	3.94789e-06	8.47824e-07	2.23851e-06	4.29507e-06
1460	0.000757667	2.46961e-05	8.77491e-05	0.000548138
1461	0	0	0	0
1462	0	0	0	0
1463	1.29816e-06	5.69235e-06	1.79502e-06	5.05039e-06
1464	0	0	0	0
1465	0	0	0	0
1466	0.000882228	2.88319e-05	0.0804125	0.0445262
1467	0.000139082	0.068027	0.00460974	0.0314235
1468	0	0	0	0
1469	0	0	0	0
1470	0	0	0	0
1471	0	0	0	0
1473	0.00132202	5.40886e-06	3.08627e-05	4.59801e-05
1474	0	0	0	0
1475	0	0	0	0
1476	0	0	0	0
1477	0	0	0	0
1478	0	0	0	0
1479	0	0	0	0
1480	0	0	0	0
1481	0	0	0	0
1482	0	0	0	0
1483	0	0	0	0
1484	0	0	0	0
1485	0	0	0	0
1486	0	0	0	0
1487	0	0	0	0
1488	0	0	0	0
1489	0	9.67316e-07	0	1.43639e-06
1490	2.40938e-07	0	1.15255e-06	6.50063e-06
1491	0	0	0	0
1492	1.19183e-06	1.23276e-05	1.49731e-06	3.38317e-07
1493	0	0	0	0
1494	0	0	0	0
1495	0	0	0	0
1496	0	0	0	0
1497	0	0	0	0
1498	0	0	0	0
1499	0	0	0	0
1500	0	0	0	0
1501	0	0	0	0
1502	0	0	0	0
1503	0	0	0	0
1504	0	0	0	0
1505	0	0	0	0
1506	0	0	0	0
1507	0	0	0	0
1508	0	0	0	0
1509	0	0	0	0
1510	0	0	0	0
1511	0	0	0	0
1512	0	0	0	0
1513	0	8.99451e-06	1.25525e-05	3.03946e-06
1514	4.52747e-05	0	4.47874e-07	4.56777e-05
1515	2.70139e-06	3.22406e-07	6.97046e-07	2.12419e-06
1516	0	0	0	0
1517	0	0	0	0
1518	0	0	0	0
1519	0	0	0	0
1520	0	0	0	0
1521	0	0	0	0
1522	0	0	0	0
1523	0	0	0	0
1524	0.0108894	0.00568378	7.55061e-05	0.00287355
1525	0	1.84144e-06	4.75639e-06	1.60356e-06
1526	0	0	0	0
1527	0	0	0	0
1528	4.88754e-05	0.00199916	0.000797779	0.00347514
1529	0	0	0	0
1530	0	0	0	0
1531	0	0	0	0
1532	0	0	0	0
1533	0	0	0	0
1534	0.00184704	0.219007	0.000622691	0.00229686
1535	0.000261646	0.0116451	0.00238808	0.00883243
1536	3.24402e-06	1.11451e-05	3.61448e-06	7.49364e-06
1537	0.00327759	0.00800828	0.00310706	0.000514453
1538	1.05918e-05	8.58068e-05	0.000694728	4.87417e-05
1539	2.96854e-06	4.52338e-06	2.81187e-06	9.35711e-07
1540	5.58373e-06	0	2.72305e-06	1.08423e-06
1541	0.0379295	0.0405885	0.00238089	0.00350694
1542	5.66318e-06	3.29287e-06	1.17085e-06	3.21363e-06
1545	1.14351e-05	0	2.26354e-06	2.96525e-06
1547	6.79666e-07	1.23332e-06	1.7323e-06	3.58611e-06
1548	0	0	0	0
1550	0.000631839	1.37099e-06	1.15025e-05	1.6355e-05
1551	0	0	0	2.8303e-06
1552	0	0	0	0
1553	0.00249	0.000645021	0.0186613	0.000905719
1554	0.0268271	0.000287114	0.000312654	0.000103661
1555	0	0	0	0
1556	0.00797021	0.000259479	0.100497	0.0111605
1557	6.57553e-05	0.0213789	0.00337405	0.0367183
1558	0	0	0	0
1559	0.000882018	0.000867535	0.0010792	0.0744528
1560	8.10193e-05	2.14515e-05	0.0210692	0.000299553
1561	0	0	0	0
1562	7.04174e-06	1.89068e-06	0.000198904	5.29934e-05
1563	0	0	0	0
1564	0	0	0	0
1565	0.00716346	0.000373043	0.00174328	0.0213387
1566	0	0	0	0
1567	0	0	0	0
1568	0	0	0	0
1569	0	0	0	0
1570	0	0	0	0
1571	0.000804124	0.0468233	0.0220918	0.0579993
1572	0	0	0	0
1573	0	0	0	0
1574	9.94197e-06	9.75675e-05	4.334e-05	2.02325e-05
1575	0	0	0	0
1576	0	0	0	0
1577	0.000140124	0.133254	0.0547111	0.00184046
1578	0.000304997	0.00409097	0.000120286	6.85315e-05
1579	0.144607	3.07232e-05	0.00175763	0.000367258
1580	4.1083e-06	0	7.26326e-06	2.08087e-06
1581	0	0	0	0
1582	0	0	0	0
1583	0	0	0	0
1584	0	0	0	0
1585	0	0	0	0
1586	0	0	0	0
1587	0.000291947	1.7184e-06	4.94006e-05	0.000434251
1588	6.75164e-06	6.23612e-06	2.35199e-06	4.1742e-05
1589	0	0	0	0
1590	0	0	0	0
1591	0	0	0	0
1592	0	0	0	0
1593	1.75061e-05	3.9381e-06	1.64204e-06	1.06932e-06
1594	4.62902e-05	0.00293049	0.00112856	0.00289272
1595	0.000141898	0.000403847	0.000600348	0.0173429
1596	0	0	0	0
1597	8.19729e-07	0	1.71632e-06	1.73151e-06
1598	7.09263e-06	0	3.44536e-06	1.54406e-05
1599	0	0	0	0
1600	0	0	0	0
1601	0	0	0	0
1603	0	0	0	0
1604	1.20919e-06	2.3224e-06	0	0
1605	0	0	1.40571e-06	1.47689e-06
1606	7.13141e-07	0	3.31194e-06	4.25022e-06
1607	1.7026e-06	2.37648e-06	6.756e-06	1.03206e-06
1608	0	0	0	0
1609	0	3.49486e-06	7.34898e-07	8.16478e-06
1612	1.00344e-06	5.03344e-06	9.44857e-07	2.86277e-06
1613	1.65671e-06	1.58915e-06	4.5019e-06	6.44971e-07
1616	0.00115214	0.00640152	0.0275549	0.659517
1617	3.49599e-06	1.47781e-06	2.04725e-06	2.09342e-06
1618	0	0	0	0
1619	0	0	0	0
1620	0	0	0	0
1621	0	0	0	0
1622	0	0	0	0
1623	0	0	0	0
1624	0	0	0	0
1625	0	0	0	0
1626	4.60427e-06	0	8.38638e-06	1.0284e-05
1627	1.12736e-05	4.87777e-07	2.08825e-06	6.91735e-06
1628	0	0	0	0
1629	0	0	0	0
1630	0.000368732	0.0643783	0.0042892	0.00273964
1631	0.000201129	0	0	0.00203747
1632	0.00162011	2.17261e-05	9.25733e-05	0.000153586
1634	0	0	0	0
1635	0	0	0	0
1636	4.05624e-06	3.20408e-05	1.55996e-06	2.16246e-05
1637	0	0	0	0
1638	2.59329e-05	0.00167336	0.00588951	0.00683907
1639	0.000424985	0.00183818	0.0512622	0.00275101
1640	1.81171e-06	2.44531e-06	5.15682e-06	1.80631e-06
1642	3.8322e-07	0	1.89857e-06	1.9308e-06
1643	0	0	0	0
1644	0	0	0	0
1645	0	0	0	0
1648	0	0	0	0
1651	2.3503e-06	1.70704e-06	1.61216e-06	2.22921e-06
1652	0	0	0	0
1653	0	0	0	0
1654	0	0	0	0
1655	0	0	0	0
1656	0	0	0	0
1657	3.19346e-06	0	2.89796e-06	6.72066e-06
1658	4.98518e-06	4.53564e-06	2.55134e-06	1.11699e-06
1659	1.29151e-05	0	0.000189187	0.000119315
1660	4.36364e-05	7.40389e-06	3.10158e-05	8.23964e-07
1661	0.00610986	5.28395e-05	0.000428015	0.00154897
1662	6.43606e-05	0.0559949	0.0219022	0.000858413
1663	7.38979e-06	2.64462e-05	2.58773e-05	0.000217432
1664	0	0	0	0
1665	0.00227915	0.236863	0.0483442	0.016694
1666	0	0	0	0
1667	0	0	0	0
1668	0	3.26158e-05	2.38726e-05	5.07335e-07
1669	0	0	0	0
1670	2.99684e-07	0	0	4.38021e-06
1671	0	0	0	0
1672	0	0	0	0
1673	3.07397e-06	7.43654e-06	2.53608e-05	0.00010689
1674	9.30303e-06	0	1.80897e-07	7.22446e-07
1675	0	0	0	0
1676	0	0	0	0
1677	0	0	0	0
1678	0	0	0	0
1679	0	0	0	0
1680	0	0	0	0
1681	5.62939e-06	2.16239e-06	1.48576e-06	0
1682	0	0	0	0
1683	0.00102754	0.05895	0.0655347	0.0038867
1684	0	4.46103e-07	1.13496e-06	7.16531e-07
1685	0	0	0	0
1686	0	0	0	0.000426705
1687	0	0	0	0
1688	0.00108197	1.67354e-05	1.76841e-05	2.19376e-05
1689	0	0	0	0
1690	0	0	0	0
1691	0	0	0	0
1692	0	0	0	0
1693	0	0	0	0
1694	0	0	0	0
1695	0	0	0	0
1696	0	0	0	0
1697	3.0737e-06	1.30482e-06	0	7.20597e-07
1698	3.04876e-07	1.21891e-06	5.5934e-06	1.16139e-06
1699	0	0	0	0
1700	0	0	0	0
1701	4.92073e-06	0	7.44704e-06	3.4129e-06
1702	0	0	0	0
1703	0	0	0	0
1704	0	0	0	0
1705	0	0	0	0
1706	0	0	0	0
1707	0	0	0	0
1708	0	0	0	0
1709	0	0	0	0
1710	4.28456e-07	0	2.29888e-06	5.66427e-06
1711	4.21326e-07	6.04338e-06	2.34747e-06	1.18905e-06
1712	0.00245169	0.000568561	0.0150407	0.00272836
1713	0	0	0	0
1714	7.83396e-07	0	3.45285e-07	7.77705e-07
1715	1.52393e-06	0	8.32528e-06	8.04576e-07
1716	1.42294e-06	2.38959e-06	1.51421e-06	7.22328e-07
1717	0	0	6.87717e-06	0
1718	0	0	3.3083e-05	3.36459e-07
1719	2.7555e-06	1.00654e-05	6.55915e-06	3.48043e-07
1720	2.97643e-07	0	1.09601e-05	3.32086e-06
1721	0	0	0	0
1722	1.97686e-06	0	3.55229e-06	2.42098e-06
1723	1.22561e-06	3.04307e-07	2.55452e-07	5.70329e-06
1724	0	0	0	0
1725	0	0	0	0
1726	0	0	0	0
1727	0	0	0	0
1728	0	0	0	0
1729	0	0	0	0
1730	2.60441e-06	0	3.63042e-07	4.78651e-06
1731	0	0	0	0
1732	6.46161e-05	3.92981e-05	0.000636369	0.0361861
1733	0.0139144	0.000128788	0.0059157	0.00424429
1734	0.00170087	0.00299532	0.0111492	0.00626585
1735	0	0	0	0
1736	1.91171e-06	0	3.98492e-07	1.98119e-06
1737	0	0	0	0
1738	0	0	0	0
1739	4.53584e-06	9.43939e-07	8.8954e-06	8.06576e-06
1740	0	0	0	0
1741	6.71447e-05	7.782e-05	9.06326e-05	0.000238129
1742	3.94261e-07	4.41055e-07	1.61808e-06	1.07243e-06
1743	0	0	0	0
1744	1.41588e-05	0	6.77795e-06	1.24897e-05
1745	0	0	6.32355e-06	3.98841e-06
1746	4.29064e-07	0	3.12321e-06	1.16871e-06
1747	1.99534e-05	0.00195098	0.00137883	0.000142582
1748	4.63857e-06	6.44355e-06	9.39765e-06	4.31993e-05
1749	0	0	0	0
1751	1.04829e-05	0	1.53325e-06	1.63719e-05
1752	0	0	0	0
1753	1.30098e-06	0	1.00257e-06	0
1754	1.86562e-05	9.61747e-06	0.00029501	2.76178e-05
1755	0	0	0	0
1757	0.00976167	7.94099e-05	0.00320675	0.00300375
1758	6.34477e-06	5.81699e-07	7.43399e-06	0.000268724
1759	0	0	0	0
1760	2.6045e-05	0	3.65437e-06	3.46459e-05
1761	0	0	0	0
1762	0	0	0	0
1763	0	0	0	0
1764	0.0043676	0.000482242	0.0279622	0.00671859
1765	0	0	0	0
1766	1.24732e-06	9.02982e-07	7.55399e-06	3.39755e-06
1767	0.000688398	0.00223263	0.00150436	0.00894875
1768	0	0	0	0
1769	2.82534e-06	7.48928e-07	3.65672e-07	5.99627e-07
1771	2.29983e-05	1.00642e-05	0.000625175	0.000177954
1773	0	0	0	0
1774	0.000673824	1.8178e-06	5.7816e-06	0.00765108
1775	3.13223e-06	2.62678e-06	1.37151e-06	3.68651e-07
1776	0	0	0	0
1777	0.000316313	0.00114612	0.0250563	0.000723721
1778	4.12384e-05	0.000417525	0.0620758	0.00320713
1780	0	0	0	0
1781	0.020926	0.00337058	0.00511836	0.0266188
1782	0.0123875	0.214843	0.00614307	0.00194266
1783	0	0	0	0
1784	0	0	0	0
1785	0	0	0	0
1786	0	0	0	0
1787	1.2478e-06	0	4.31163e-06	1.07509e-06
1788	0	0	0	0
1789	0	0	0	0
1790	0	0	0	0
1791	0	0	0	0
1792	0	0	0	0
1793	0	0	0	0
1794	0	0	0	0
1795	7.87656e-07	1.31199e-06	6.31124e-07	1.18858e-06
1796	3.97201e-07	0	2.67445e-06	2.95577e-06
1797	2.95125e-06	2.38467e-06	6.84117e-07	2.5974e-06
1798	5.5052e-06	1.20722e-06	1.29342e-05	2.0722e-06
1799	4.3197e-06	6.23039e-06	3.6353e-06	1.48693e-05
1800	0	0	0	0
1801	0	0	0	0
1802	0	0	0	0
1803	0	0	0	0
1804	0	0	0	0
1805	0	0	0	0
1806	0	0	0	0
1808	0	0	0	0
1809	2.69992e-06	1.05688e-06	4.46769e-06	3.28064e-06
1810	0	0	0	0
1811	0	0	0	0
1812	0.0236795	6.68657e-05	0.000137561	0.000354091
1813	0	0	0	0
1814	0	0	0	0
1815	3.40111e-05	1.09299e-05	0.000728863	3.93179e-06
1816	0.00319777	0.000390106	0.00194202	0.00185743
1817	0	0	0	0
1818	3.16455e-05	3.51146e-05	0.00390354	0.0110764
1819	3.09897e-05	4.8903e-05	0.00294986	0.000299445
1820	0	0	0	0
1821	0	0	0	0
1822	0.000470218	0.00851845	0.00881203	0.0363595
1823	0.00133952	5.37255e-05	0.000554142	0.000292531
1824	0.00138493	0.019544	0.0293306	0.00181725
1825	0.00117369	0.00701059	0.000436755	0.000268237
1826	0.000704735	0.17386	0.00613538	0.0170199
1827	0.000360542	0.000929063	0.0073765	0.00134254
1828	0	0	0	0
1829	0	0	0	0
1830	0	0	0	0
1831	2.95263e-06	1.60176e-06	5.67415e-07	2.32629e-06
1832	0	0	0	0
1833	0	0	0	0
1834	0	0	0	0
1835	0	0	0	0
1836	9.31456e-07	4.94376e-07	2.02031e-06	1.59841e-06
1837	0	0	0	0
1838	0	0	0	0
1839	7.48528e-06	0	6.33806e-06	2.1233e-05
1841	0	0	0	0
1842	0	0	0	0
1843	0	0	0	0
1844	0	0	0	0
1845	0	0	0	0
1846	0	0	0	0
1847	0	0	0	0
1848	0	0	0	0
1849	0	0	0	0
1850	9.71019e-06	0	1.46238e-06	0
1851	0	0	0	0
1852	0	0	0	0
1853	0	0	0	0
1854	0	0	0	0
1855	0	0	0	0
1856	0	0	0	0
1857	0	0	0	0
1858	0	0	0	0
1859	0	0	0	0
1860	0	0	0	0
1861	0	0	0	0
1862	0	0	0	0
1863	0	0	0	0
1864	0	0	0	0
1865	0	0	0	0
1866	0	0	0	0
1867	0	0	0	0
1868	0.000708525	0	0	0.00204047
1869	0	0	0	0
1870	0	0	0	0.000288086
1871	0	0	0	0.000240168
1872	0	0	0	0
1873	0	0	0	0
1874	0	0	0	0
1875	0	0	0	0
1876	0	0	0	0
1877	0	0	0	0
1878	0.00112501	0	5.23469e-06	0.00200451
1879	0	0	0	0
1880	0	0	0	0
1881	0	0	0	0
1882	0	0	0	0
1883	0	0	0	0
1884	0	0	0	0
1885	0	0	0	0
1886	0	0	0	0
1887	0	0	0	0
1888	0	0	0	0
1889	0	0	0	0
1890	0	0	0	0
1891	0	0	0	0
1892	0	0	0	0
1893	0	0	0	0
1894	0	0	0	0
1895	0	0	0	0
1896	0	0	0	0
1897	0	0	0	0
1898	0	0	0	0
1899	0	0	0	0
1900	0	0	0	0
1901	0	0	0	0
1902	0	0	0	0
1903	0	0	0	0
1904	0	0	0	0
1905	0	0	0	0
1906	0	0	0	0
1907	0	0	0	0
1908	0	0	0	0
1909	0	0	0	0
1910	0	0	0	0
1911	0	0	0	0
1912	0	0	0	0
1913	0	0	0	0
1914	0	0	0	0
1915	0	0	0	0
1916	0	0	0	0
1917	0	0	0	0
1918	0	0	0	0
1919	2.07379e-05	1.33135e-06	9.81382e-05	3.8884e-06
1920	0.0013823	3.34552e-05	7.93167e-05	0.00019012
1921	6.81617e-06	6.26708e-06	2.42983e-05	0.000467883
1922	0	0	0	0
1923	0	2.69177e-06	6.68001e-07	3.31486e-07
1924	0	0	0	0
1925	0	0	0	0
1926	0	0	0	0
1927	0.0219298	0.00592591	0.00248008	0.804076
1928	4.3066e-06	0	3.71574e-06	4.15598e-06
1929	0	0	0	0
1930	0.00596754	0.00183375	0.218998	0.714982
1931	0	0	0	0
1933	9.41993e-07	6.88809e-06	2.40403e-06	0
1934	0	0	0	0
1935	0	0	0	0
1936	0	0	0	0
1937	0	0	0	0
1938	0	0	0	0
1939	0	0	0	0
1940	0	0	0	0
1941	0	0	0	0
1942	3.14041e-06	4.05524e-07	2.1226e-06	8.65623e-07
1943	0	0	0	0
1944	0	0	0	0
1945	6.35632e-07	0	1.76646e-06	3.20092e-06
1946	3.83265e-07	0	4.04011e-06	3.6324e-06
1947	4.82107e-07	0	1.31884e-05	7.18779e-06
1948	0	0	7.49828e-07	1.2473e-06
1949	9.09455e-07	0	4.74527e-06	8.74755e-06
1950	3.21926e-06	0	4.80946e-06	0
1951	0.65353	0.00109284	0.0193473	0.146227
1952	2.79128e-07	7.91052e-07	1.26051e-05	6.89583e-06
1953	3.01611e-05	1.04331e-06	5.99248e-06	0.0245996
1954	0	0	0	0
1955	0	0	0	0
1956	0	0	0	0
1957	0	0	0	0
1958	0.000669892	0.117831	0.639868	0.00217335
1959	6.58594e-06	3.11435e-07	1.85319e-06	0
1960	0	0	0	0
1961	0	0	0	0
1962	0	0	0	0
1963	0	0	0	0
1964	0	0	0	0
1965	0	0	0	0
1966	7.63638e-06	8.73197e-06	3.7354e-05	1.61926e-05
1967	0.000505863	2.54892e-05	0.0152274	0.00859098
1968	7.41914e-06	0	8.01288e-07	2.13228e-06
1969	0	0	0	0
1970	0	0	0	0
1971	0	0	0	0
1972	0	0	0	0
1973	3.12896e-05	4.85012e-05	0.0044195	0.00337039
1974	0.000554885	0.000268054	0.020394	0.00225237
1975	0.0026779	0.00144442	4.48903e-05	0.00167897
1976	0	0	0	0
1977	0	0	0	0
1978	0	0	0	0
1979	0	0	0	0
1980	0	0	0	0
1981	0	0	0	0
1982	0	0	0	0
1983	0	0	0	0
1984	0	0	0	0
1985	0	0	0	0
1986	0	0	0	0
1987	0	0	0	0
1988	0	0	0	0
1989	0	0	0	0
1990	0	0	0	0
1991	0	0	0	0
1992	0	0	0	0
1993	0	0	0	0
1994	0	0	0	0
1995	0	0	0	0
1996	0	0	0	0
1997	0	0	0	0
1998	0	0	0	0
1999	0	0	0	0
2000	0	0	0	0
2001	0	0	0	0
2002	0	0	8.76367e-07	2.13431e-06
2003	0	0	0	0
2004	0	0	0	0
2005	0	0	0	0
2006	0	0	0	0
2007	0.0373903	0.0630521	0.107542	0.0144233
2008	0	0	0	0
2010	0	0	0	0
2011	0	0	0	0
2012	0	0	0	0
2013	2.74732e-05	0	2.21952e-06	7.14965e-05
2014	0	0	0	0
2015	0.000286861	0.00468475	0.0156686	0.0252789
2016	0	0	7.55624e-06	6.36617e-06
2017	0.000263827	7.65384e-05	0.00015318	0.0157034
2018	0	0	0	0
2019	0	0	0	0
2020	0	0	0	0
2021	0	0	0	0
2022	0	0	0	0
2023	0	0	0	0
2024	0	0	0	0
2025	0	0	0	0
2026	0	0	0	0
2027	0	0	0	0
2028	0	0	0	0
2029	0	0	0	0
2030	0.0141448	2.69472e-05	0.000930448	0.0387195
2031	0	0	0	0
2032	2.19565e-05	6.52826e-06	0.000457282	5.82137e-05
2033	0	0	0	0
2034	0	0	0	0
2035	0	0	0	0
2036	0	0	0	0
2037	0	0	0	0
2038	9.85033e-06	5.05734e-06	3.33131e-06	3.28817e-06
2039	2.11448e-06	0	6.25163e-06	0.019046
2040	0	0	0	0
2041	0	0	0	0
2042	0	0	0	0
2043	0	0	0	0
2044	0	0	0	0
2045	0	0	0	0
2046	0	0	0	0
2047	0	0	0	0
2048	0	0	0	0
2049	0	0	0	0
2050	0	0	0	0
2051	0	0	0	0
2052	0	0	0	0
2053	0	0	0	0
2054	0	0	0	0
2055	0.437158	0.059166	3.9436e-05	6.26957e-05
2056	0	1.37319e-06	1.66338e-06	1.94001e-06
2057	0	0	0	0
2058	0	0	0	0
2059	0	0	0	0
2060	3.18433e-05	0.00711608	0.0704698	0.00657459
2061	5.45461e-05	0.000624812	0.000515645	0.00184321
2062	0	0	0	0
2063	3.20196e-05	0	2.22445e-06	0.000135308
2064	5.27769e-06	4.75947e-06	9.06633e-06	1.39251e-05
2065	0.00502285	0.000491255	0.00525837	0.0684857
2066	0	0	0	0
2067	7.23038e-06	1.47115e-06	3.13751e-06	3.42316e-06
2068	0	0	0	0
2069	0	0	0	0
2070	0	0	0	0
2071	0	0	0	0
2072	0	0	0	0
2073	0	0	0	0
2074	0	0	0	0
2075	0	0	0	0
2076	0	0	0	0
2077	0	0	0	0
2078	0	0	0	0
2079	0	0	0	0
2080	0	0	0	0
2081	0.000719649	0.00089733	0.000363403	0.0185788
2082	0	0	0	0
2083	0	0	0	0
2084	0.000154165	0.00177923	0.000648541	1.78774e-05
2085	5.62159e-07	0	4.03429e-07	2.31101e-06
2086	0	0	0	0
2087	0	0	0	0
2088	0	0	1.77374e-06	0
2089	5.67526e-06	0	3.08407e-05	5.8973e-06
2090	2.23593e-07	0	0	1.27415e-05
2091	0	0	0	0
2092	0	0	8.75779e-06	5.82523e-05
2093	0	0	0	0
2094	0	0	0	0
2095	1.71306e-06	0	1.61879e-06	0
2096	0	0	0	0
2097	0	0	0	0
2098	0	0	0	0
2099	0	0	0	0
2100	0	1.04946e-06	1.27125e-05	4.03076e-07
2101	0	0	0	0
2102	0.00602713	0.000147159	0.00219082	0.000458787
2103	0	0	0	0
2104	0	0	0	0
2105	0	0	0	0
2106	0.00641663	0.00121665	0.000788225	0.00950059
2107	0	0	0	0
2108	0	0	0	0
2109	0	0	0	0
2110	0	0	0	0
2111	0	0	0	0
2112	0	0	0	0
2113	0	0	0	0
2114	0	0	0	0
2115	0.00117892	0.0014581	0.0872047	0.0041686
2116	0.00153134	0.00659828	0.251728	0.00108477
2117	0	0	0	0
2118	0	0	0	0
2119	0	0	0	0
2120	0	0	0	0
2121	0	0	0	0
2126	0	0	0	0
2127	0	0	0	0
2128	1.39919e-06	4.16014e-07	1.26559e-06	1.09428e-05
2129	0	0	0	0
2130	4.85144e-06	1.56872e-06	1.92639e-05	7.49128e-06
2131	0	0	0	0
2132	0	0	0	0
2133	2.71513e-05	2.10175e-06	7.1564e-06	0.00192992
2134	1.7253e-05	0	2.10824e-06	3.90137e-06
2135	0	0	0	0
2136	1.0256e-05	0	0	3.4518e-06
2137	0	0	0	0
2138	0	0	0	0
2139	0	0	0	0
2140	0	0	0	0
2141	0	0	0	0
2142	0	0	0	0
2143	0	0	0	0
2144	0	0	0	0
2145	0	0	0	0
2146	0	0	0	0
2147	4.42291e-06	8.71575e-07	5.51075e-07	6.64952e-07
2148	3.18087e-06	0	2.86866e-06	7.05307e-07
2149	1.61406e-05	3.16501e-05	0.000468498	0.000686833
2150	1.86445e-05	6.39322e-05	0.000119835	3.36075e-05
2151	0	0	0	0
2152	2.04015e-05	0.000125937	0.00368197	3.47773e-05
2153	0	0	4.95098e-06	7.59659e-07
2154	5.04619e-05	1.76866e-06	0.000109795	0.000118263
2155	0	0	0	0
2158	0	0	0	0
2159	0	0	0	0
2160	3.58841e-06	1.59548e-06	1.0844e-06	5.95249e-07
2161	3.47932e-07	0	1.25896e-06	2.85938e-06
2162	0	0	0	0
2163	0.000467868	0.000277927	0.0593165	0.00887626
2164	0	0	0	0
2165	0.000135627	1.92322e-05	3.65421e-06	8.01903e-06
2166	0.00136132	0.000670383	0.0992877	0.0923209
2167	0.00112162	0.00730909	0.000573596	0.00620402
2168	0	0	0	0
2169	0	0	0	0
2170	2.04791e-06	1.04441e-05	2.94326e-06	2.1572e-06
2171	1.12765e-06	0	1.18144e-05	2.13384e-06
2173	0	0	0	0
2174	0	0	0	0
2175	1.47246e-05	7.67646e-06	1.35991e-06	6.68586e-07
2176	0	0	0	0
2177	0	0	0	0
2178	0	0	0	0
2179	0	0	0	0
2180	0	0	0	0
2182	0	0	0	0
2183	0	1.53073e-06	2.82948e-07	1.73333e-07
2184	4.72837e-07	0	1.07794e-06	8.88628e-07
2185	0.000172534	4.0826e-05	0.0330891	0.0148854
2186	6.30134e-07	1.03319e-06	4.96214e-06	1.50295e-06
2187	0	0	0	0
2188	2.5145e-06	0	7.69838e-06	1.50069e-06
2189	1.30705e-05	2.95565e-06	3.95795e-06	0.000467063
2190	0	0	0	0
2191	5.82786e-06	3.34633e-05	1.3822e-05	3.84013e-05
2192	0	0	0	0
2193	0.000535584	0.00701445	0.050297	0.00179415
2194	4.75124e-06	3.69728e-05	0.000436033	0.000115721
2195	0.000811831	0.000587504	0.000838203	0.00221089
2196	0	0	0	0
2197	0.000151783	5.87994e-05	0.00241033	0.000746233
2198	0	0	0	0
2199	0	0	0	0
2200	0	0	0	0
2201	0	0	0	0
2202	0	0	0	0
2203	5.98208e-06	0	1.32194e-06	1.57757e-06
2204	0	0	0	0
2205	4.54651e-06	5.46251e-07	1.2738e-06	4.22437e-06
2206	0	0	0	0
2207	0	0	2.55027e-06	9.49472e-07
2209	3.14746e-06	0	0.000157363	0.000230202
2210	0.0080798	0.000111971	0.000179085	0.000121025
2211	0	0	0	0
2212	0	9.10302e-06	2.34774e-06	1.14577e-06
2213	8.71857e-07	6.05822e-06	1.40957e-06	8.04704e-07
2214	0	0	0	0
2215	0	0	0	0
2216	0	0	0	0
2217	1.84727e-05	0	7.15198e-06	1.70712e-05
2218	4.72945e-07	1.63247e-06	4.05638e-06	1.94425e-06
2219	0	0	0	0
2220	2.67719e-06	0	4.0776e-07	5.39133e-06
2221	0	5.11222e-06	2.12286e-06	1.32479e-06
2222	0	0	0	0
2223	0	0	0	0
2224	0	0	0	0
2225	2.09727e-05	5.63938e-05	2.97115e-07	0.000169316
2226	0	0	0	0
2227	0.545777	0.000179945	5.58075e-05	7.68782e-05
2228	0.000328176	3.18423e-05	0.000144914	0.000136495
2229	0	0	0	0
2230	1.92562e-06	1.39715e-06	4.40184e-07	3.06899e-06
2231	0	0	0	0
2232	9.53544e-07	3.2729e-07	2.01787e-06	9.82968e-07
2233	1.00293e-05	0	5.93508e-06	9.40251e-06
2234	0.000121461	0	0	3.43538e-05
2235	1.26261e-05	0.0115925	0.0187181	0.000585621
2236	0	0	0	0
[truncated: 657 more rows]

## Sheet: SHAP_All_Endotypes_Sum
GEM Reaction index	Fraction – Endotype A	Fraction – Endotype B	Fraction – Endotype C	Fraction – Endotype D	Sum of SHAP values
1930	0.633645	0.194711	23.2536	75.9181	0.941781
1927	2.62818	0.71019	0.297225	96.3644	0.834412
1951	79.6796	0.133241	2.35886	17.8283	0.820197
1958	0.088081	15.493	84.1332	0.285764	0.760541
2249	91.5178	7.34178	0.998696	0.141705	0.70959
2467	0.268939	77.6616	7.35521	14.7143	0.705889
1616	0.165864	0.921578	3.96687	94.9457	0.694626
2394	0.388859	0.178094	62.1972	37.2359	0.679295
2429	24.169	0.222473	16.8058	58.8028	0.636995
2436	3.23937	85.5267	0.365081	10.8688	0.617348
2444	0.117002	97.6426	2.12957	0.110794	0.579971
2397	47.8292	18.1173	33.9833	0.0702055	0.568446
480	4.22745	94.6917	0.967032	0.113846	0.549608
2227	99.9427	0.0329515	0.0102195	0.0140779	0.546089
1163	0.07244	39.5636	40.4703	19.8936	0.541153
1234	98.5396	0.34365	0.671996	0.444758	0.53248
200	0.317874	98.9623	0.492026	0.227821	0.49765
1334	84.8057	0.0218193	0.295814	14.8767	0.49699
2055	88.061	11.9184	0.00794397	0.0126294	0.496426
2544	0.536679	43.3117	50.1307	6.02096	0.482923
1130	0.398408	67.1087	1.03886	31.4541	0.45762
1185	97.8803	0.268703	0.288493	1.56247	0.447696
2744	99.2312	0.360338	0.104423	0.304023	0.445307
2450	60.5849	19.4653	9.35289	10.5969	0.435435
2466	1.53751	0.272782	62.8881	35.3016	0.423052
32	97.3702	0.00011091	2.61087	0.0187925	0.415333
457	0.414266	0.0254177	54.9312	44.6291	0.407858
2474	21.1905	70.4617	4.57185	3.77595	0.379243
1419	0.285503	0.0379185	28.0369	71.6397	0.369613
2305	0.015965	91.186	7.39935	1.3987	0.361396
2388	0.0645607	4.70138	16.6508	78.5833	0.3571
89	86.0228	12.1538	1.18446	0.638985	0.356727
534	38.1964	33.3271	6.31697	22.1596	0.35392
2838	0.10532	0.0597904	54.447	45.3879	0.347975
2404	0.162602	63.5017	0.607296	35.7284	0.345285
2419	0.300811	89.8423	7.96067	1.89624	0.337967
2730	0.498441	0.983134	39.5609	58.9576	0.333419
2485	0.309719	2.34047	56.4743	40.8755	0.328439
2393	63.0537	27.9126	4.66774	4.36595	0.322044
2461	90.2438	0.230961	8.6511	0.874159	0.313783
462	1.51252	93.4109	0.416392	4.66023	0.304805
1665	0.749274	77.8693	15.8933	5.48818	0.304181
2497	1.23635	89.6796	3.90659	5.17748	0.289777
464	0.0578484	0.0124444	30.5431	69.3866	0.287444
460	0.0118204	17.8298	80.7821	1.37632	0.285007
16	26.7918	6.29645	1.86539	65.0464	0.284935
2378	63.0719	0.127656	35.0786	1.72177	0.279047
885	0.123237	0.00714805	0.25901	99.6106	0.273548
2584	0.0212021	51.6199	15.2957	33.0632	0.266744
2116	0.586851	2.52864	96.4688	0.415713	0.260942
2423	20.5185	41.0557	31.1649	7.2609	0.258811
1386	4.01582	2.61335	87.0861	6.28468	0.257231
423	99.5639	0.00218614	0.37481	0.0590586	0.251171
2239	99.4393	0.0400989	0.408316	0.112291	0.25057
1782	5.26418	91.2997	2.61056	0.825554	0.235316
2460	4.73856	3.20433	88.9151	3.14201	0.23398
479	3.01725	0.268013	84.4646	12.2502	0.225763
1534	0.825403	97.8699	0.278268	1.02642	0.223774
2007	16.8116	28.3498	48.3535	6.48508	0.222407
2483	80.2248	0.163726	0.505693	19.1058	0.22132
2420	28.8065	0.0886755	63.0337	8.07112	0.220937
2311	1.10881	0.0691925	9.37471	89.4473	0.215745
85	1.87179	18.7619	16.7314	62.6349	0.21495
2396	0.637576	0.462556	14.2564	84.6434	0.204996
1826	0.356431	87.9324	3.10306	8.60806	0.19772
2166	0.703017	0.3462	51.2743	47.6765	0.19364
1319	0.0688249	96.771	0.599314	2.56084	0.191815
1577	0.0737705	70.1537	28.8036	0.968943	0.189945
865	6.26607	5.80594	21.414	66.514	0.189093
2308	1.85619	0.651284	49.4798	48.0128	0.187056
2280	12.3537	24.8495	60.5079	2.28893	0.185524
229	0.0302915	0.00290297	0.0113479	99.9555	0.184692
1298	0.77005	21.6942	42.8867	34.6491	0.172226
2288	91.1694	0.955397	0.728302	7.14691	0.171677
311	3.15089	0.051585	95.31	1.48758	0.165651
258	0.367142	67.0402	24.484	8.10867	0.162061
2415	11.1894	0.175843	84.589	4.04579	0.161634
344	0.458959	82.5634	1.88235	15.0953	0.160639
2434	0.327562	0.406595	24.94	74.3258	0.16016
2441	0.0461586	1.90509	71.9707	26.0781	0.158137
1315	0.127998	7.52483	92.0863	0.260912	0.157701
2861	1.75229	0.0499086	23.6786	74.5192	0.157096
2306	0.232612	26.3758	3.58139	69.8102	0.146948
1579	98.5312	0.0209339	1.1976	0.250239	0.146763
466	97.2968	1.58609	0.863089	0.254016	0.139883
250	15.1913	2.38798	67.1242	15.2965	0.139153
2443	30.2523	0.978456	67.055	1.7142	0.136631
2422	20.1971	32.8	46.4017	0.60112	0.132713
1683	0.794086	45.5568	50.6455	3.00366	0.129399
1571	0.629607	36.6613	17.2973	45.4118	0.127719
1466	0.701017	0.0229098	63.8957	35.3804	0.12585
2479	17.4572	58.3026	6.28619	17.954	0.123554
1556	6.64808	0.216435	83.8263	9.30918	0.119887
2478	0.689741	1.71783	25.5511	72.0413	0.117895
253	1.44432	7.9279	65.794	24.8338	0.117385
1416	99.1315	0.0874414	0.620548	0.16055	0.112667
1189	53.6001	40.0773	0.614331	5.70821	0.111237
2496	0.349617	92.6317	2.56697	4.45173	0.110378
2481	49.3347	13.4663	7.42845	29.7705	0.108013
1201	0.0313034	0.78305	62.3676	36.8181	0.106185
940	96.0765	1.75667	1.21282	0.953965	0.10608
1467	0.133476	65.2854	4.42396	30.1571	0.104199
493	0.517216	0.0625229	0.229006	99.1913	0.103974
2484	32.1276	54.1148	6.08591	7.67167	0.098975
75	35.3884	2.54288	3.0676	59.0011	0.0982998
598	1.61755	97.8125	0.300904	0.269089	0.0981957
2495	3.23775	0.150677	4.02682	92.5848	0.0963243
2882	0.00119443	0.0152013	12.7757	87.2079	0.0960715
2382	0.166949	78.5388	16.1192	5.17502	0.0955484
2465	0.571752	2.42354	93.7453	3.2594	0.0948506
2448	7.65007	5.78843	44.4912	42.0703	0.0940636
2115	1.25403	1.551	92.7608	4.43419	0.0940103
2566	0.607993	4.12479	85.4662	9.801	0.0924429
994	0.431383	40.2165	27.0024	32.3497	0.0914907
156	0.10621	29.1069	66.3891	4.39777	0.0906935
2738	20.381	0.536158	78.6173	0.465513	0.0895391
2387	1.09049	60.7442	26.8021	11.3632	0.089271
2411	0.552129	0.239581	49.7779	49.4304	0.089111
41	5.7234	62.2851	14.249	17.7424	0.0890365
2651	0.539889	86.1954	1.3996	11.8651	0.0865931
1541	44.937	48.0873	2.82076	4.15486	0.0844059
2060	0.0378221	8.45217	83.701	7.80901	0.0841923
1202	0.362484	42.0156	0.86105	56.7609	0.0831049
426	2.04228	0.611366	96.6311	0.715229	0.0811491
893	0.00164117	0.00203261	0.0447193	99.9516	0.0798392
2065	6.33733	0.619816	6.63448	86.4084	0.0792582
2580	0.258818	1.07104	75.6385	23.0317	0.079194
2454	10.377	63.861	20.9241	4.8379	0.079169
1662	0.0816553	71.0416	27.7877	1.08908	0.0788199
224	0.431703	0.214041	3.03648	96.3178	0.0781934
2412	1.81101	12.9994	28.7984	56.3911	0.0773388
1559	1.1413	1.12256	1.39645	96.3397	0.0772816
1322	0.0794707	98.8505	0.352988	0.717072	0.0753782
2603	51.7954	29.1324	1.21629	17.8559	0.0749971
960	44.1101	23.7944	11.6033	20.4922	0.0741306
2490	16.029	9.89821	2.52174	71.5511	0.0739148
2453	2.25127	10.7267	82.4154	4.60655	0.0717931
1630	0.513727	89.6935	5.97582	3.81693	0.0717759
1299	27.0552	27.0633	42.4664	3.41507	0.0695868
2163	0.678674	0.403153	86.0426	12.8756	0.0689385
2279	3.42557	5.65389	80.3215	10.599	0.0682393
755	21.6438	1.50115	73.4145	3.4406	0.0678458
414	2.68197	2.60106	92.8578	1.85919	0.066153
1778	0.0627279	0.6351	94.4238	4.87839	0.0657417
2400	99.3681	0.0201182	0.556489	0.0552619	0.0654729
2424	6.46845	13.507	75.4474	4.57712	0.0654708
2480	1.11369	0.576907	27.4401	70.8693	0.0647709
2451	3.31457	25.4116	64.7332	6.54061	0.0639368
2392	89.4939	0.388098	7.01604	3.10201	0.0636784
232	92.8928	0.0564675	5.48834	1.56242	0.0632779
2433	30.7806	64.4962	4.04966	0.673528	0.0619837
2371	8.79877	85.9692	2.58932	2.64268	0.0616281
1557	0.106855	34.7416	5.48296	59.6686	0.061537
383	80.3632	4.58513	12.1641	2.88749	0.0607317
2193	0.898009	11.7611	84.3327	3.00824	0.0596412
1639	0.755174	3.26635	91.0901	4.88838	0.0562764
1781	37.3454	6.01526	9.13442	47.5049	0.0560338
2418	3.4718	14.1102	11.8528	70.5652	0.0555142
239	0.00811255	0.00288075	0.00381968	99.9852	0.0547364
1822	0.868198	15.7282	16.2703	67.1333	0.0541603
2439	10.7756	25.7152	7.53511	55.9741	0.0540581
921	1.09933	64.1197	6.25981	28.5211	0.0538255
2030	26.2808	0.0500676	1.72876	71.9403	0.0538217
2452	74.9057	0.94573	15.8092	8.33939	0.0532504
1200	99.4883	0.0154485	0.0259441	0.470262	0.05318
2395	1.70497	6.1835	85.7236	6.38797	0.0530013
343	0.437478	0.359813	86.0961	13.1066	0.0523224
1824	2.6594	37.5291	56.3219	3.48957	0.0520768
823	0.00475768	0.00643098	0.00347162	99.9853	0.0498134
2286	10.7978	82.351	1.80907	5.04218	0.0492582
2449	0.3079	90.0777	3.06961	6.54474	0.0484316
2185	0.358044	0.0847226	68.6669	30.8904	0.0481879
1160	40.9784	2.98133	19.7448	36.2955	0.0464873
2266	0.127129	0.231914	6.47327	93.1677	0.0462239
2015	0.624709	10.2022	34.1221	55.051	0.0459191
2568	43.005	32.3689	3.20745	21.4187	0.0455301
96	67.2696	0.386878	26.8578	5.48578	0.0447739
473	98.773	0.0500431	0.51481	0.662099	0.0444857
2493	92.8907	3.64298	1.41495	2.05141	0.0442888
2447	0.501681	65.9253	10.4247	23.1483	0.043264
535	4.41805	27.0445	4.91132	63.6261	0.0430252
289	0.379039	0.263732	2.23546	97.1218	0.0420963
1338	11.3997	0.200001	0.186664	88.2136	0.0418352
329	0.0335611	0.0140587	0.228078	99.7243	0.0417132
2487	31.2819	2.47938	15.5038	50.7348	0.0411245
2592	29.6014	0.674343	68.7953	0.928974	0.0399676
2410	18.1374	1.11113	65.0043	15.7471	0.0399192
1764	11.0486	1.21992	70.7356	16.9959	0.0395307
2276	0.364657	95.7606	2.30623	1.56854	0.0395201
86	82.8801	0.135157	0.532623	16.4521	0.0385366
447	85.6938	1.41603	0.946709	11.9435	0.0383058
150	12.8685	8.69012	73.0492	5.39212	0.0377259
2427	0.554659	38.0533	57.5932	3.79885	0.0372717
1732	0.174986	0.106423	1.72334	97.9953	0.0369264
2281	0.838865	2.50193	94.4475	2.21167	0.03652
2391	9.71069	52.4089	19.5565	18.3238	0.0363572
2417	2.26385	17.105	26.7693	53.8619	0.036223
169	29.8217	0.00374432	69.6439	0.530696	0.0359817
191	96.1259	0.122074	2.41107	1.34095	0.0359165
590	1.16173	0.934737	93.531	4.37253	0.0352148
2403	48.1559	1.52141	49.51	0.812712	0.0351961
88	0.121469	0.187944	7.91018	91.7804	0.0347865
2446	15.9409	3.48944	79.2766	1.29313	0.0347738
2464	23.3486	67.4396	5.8602	3.35165	0.0327781
2416	0.580292	8.85153	46.2797	44.2885	0.0324366
2486	4.79332	46.9615	37.1878	11.0573	0.0321541
595	0.211087	7.84094	8.39545	83.5525	0.0320934
961	0.339241	11.4642	26.1504	62.0462	0.0319986
2545	0.122767	90.6652	8.95367	0.258413	0.031886
2235	0.0408496	37.5054	60.5591	1.89467	0.0309089
1565	23.3959	1.21836	5.69355	69.6922	0.0306185
2300	13.5904	5.04276	68.7413	12.6255	0.0306081
2272	80.2807	12.1159	4.8653	2.73814	0.0305079
2421	2.01041	25.295	48.3842	24.3104	0.0303368
298	0.855614	0.809401	35.0898	63.2452	0.0299034
2778	0.749192	4.95237	6.66369	87.6347	0.029646
2432	10.5328	17.9055	20.4017	51.1599	0.0295828
83	4.11456	88.1748	5.25152	2.45915	0.0293547
2469	35.3892	21.2939	12.5328	30.784	0.0292404
196	8.2272	3.5801	4.5003	83.6924	0.0289666
454	0.0310969	99.0921	0.091319	0.785479	0.0285105
2673	87.789	1.58953	0.413554	10.2079	0.0282939
2472	0.815986	66.6704	10.3662	22.1474	0.0281388
151	6.76721	35.1854	1.75829	56.2891	0.0278965
1554	97.4449	1.04289	1.13566	0.37653	0.0275306
300	19.6591	37.3751	2.56416	40.4016	0.0273599
1777	1.1611	4.2071	91.9752	2.65659	0.0272424
2317	2.94865	37.5923	42.3395	17.1196	0.0266395
1293	21.0594	0.0310846	0.00281287	78.9067	0.0263756
2354	0.109781	17.7798	66.8959	15.2145	0.0256975
927	18.9108	3.97891	12.8927	64.2176	0.0255316
164	0.275299	0.0337101	0.0320564	99.6589	0.025283
106	3.32631	2.05777	82.6885	11.9274	0.0252375
131	5.59328	15.8259	8.57036	70.0105	0.0251082
2414	0.865059	4.05294	79.0522	16.0298	0.0248917
1953	0.122423	0.00423477	0.0243233	99.849	0.0246368
2459	1.64257	4.87573	3.58909	89.8926	0.0245686
1967	2.07749	0.10468	62.5362	35.2817	0.0243497
1812	97.6957	0.275871	0.567544	1.46089	0.024238
2290	76.4027	18.7177	3.18227	1.69728	0.0242202
1733	57.49	0.532112	24.4418	17.5361	0.0242032
2470	5.1252	10.4553	53.4225	30.9969	0.0241344
2780	1.5092	87.9772	5.17656	5.33704	0.0238761
1974	2.3643	1.14215	86.8964	9.59711	0.0234693
2314	33.3007	9.23642	8.35732	49.1056	0.0234434
1535	1.13133	50.3523	10.3258	38.1906	0.0231272
1553	10.9682	2.84125	82.201	3.98959	0.022702
416	25.5747	17.653	43.2749	13.4974	0.0226018
1734	7.6923	13.5466	50.4233	28.3378	0.0221113
84	0.0850382	75.1533	12.4537	12.308	0.021998
2425	20.2416	19.0764	54.342	6.33993	0.0217937
475	97.1575	0.0770646	0.551957	2.21347	0.0216927
1560	0.37734	0.0999082	98.1276	1.39514	0.0214712
2278	22.3716	33.2376	42.7669	1.62384	0.020796
1712	11.793	2.73487	72.3482	13.1239	0.0207893
2081	3.50037	4.36461	1.76759	90.3674	0.0205592
926	3.34388	10.8277	79.4433	6.38513	0.0202957
678	0.0950408	0.0022376	0.120795	99.7819	0.020049
157	3.68292	8.4991	49.583	38.2349	0.0197785
2277	0.971606	94.705	1.01416	3.30924	0.0197614
2430	75.2663	10.0008	6.84275	7.89015	0.0197308
364	7.88266	0.609408	24.4112	67.0967	0.0197085
2832	89.8708	2.60533	7.25787	0.266003	0.0197041
1524	55.7796	29.1143	0.386769	14.7193	0.0195223
2595	0.484881	1.02634	47.559	50.9298	0.0191586
2039	0.0110971	0	0.0328094	99.9561	0.0190544
1595	0.767472	2.18425	3.24705	93.8012	0.018489
2802	19.6272	12.3356	59.9633	8.07387	0.0182065
2106	35.8029	6.78857	4.39806	53.0105	0.0179221
2840	99.7626	0.0486047	0.10961	0.0792425	0.0176105
988	0.102093	0.423715	30.0822	69.392	0.0174003
1438	2.07804	16.449	1.69542	79.7775	0.017381
848	0.146146	0.00648118	0.158793	99.6886	0.017072
2428	0.521303	32.571	48.3969	18.5108	0.0170573
2321	0	0	0	100	0.0166953
2389	2.92839	0.380133	26.8067	69.8847	0.0166249
352	1.9437	4.6256	8.94203	84.4887	0.0165196
256	6.21023	57.0149	14.1954	22.5794	0.0164709
2017	1.62887	0.472549	0.945737	96.9528	0.0161969
1757	60.8144	0.494717	19.9778	18.7131	0.0160516
2167	7.37502	48.0598	3.7716	40.7936	0.0152083
1818	0.210316	0.233371	25.9429	73.6134	0.0150467
1537	21.9864	53.7202	20.8424	3.45099	0.0149074
2390	9.28526	0.278581	19.0557	71.3805	0.0145343
1638	0.179741	11.5981	40.8204	47.4018	0.0144279
2499	0.814694	39.9719	17.2449	41.9685	0.0142363
76	27.1121	3.72946	2.88856	66.2699	0.0141825
849	9.54259	18.1232	4.43353	67.9007	0.0139168
2583	1.86843	9.66795	82.7447	5.71896	0.0136924
2494	9.24129	3.85994	63.043	23.8557	0.0136382
1053	6.09137	12.2092	6.99782	74.7016	0.0134728
1767	5.14723	16.6937	11.2483	66.9108	0.0133741
122	66.596	0.180263	17.3113	15.9124	0.0132976
378	13.9037	35.8187	43.4724	6.80512	0.0131324
2590	7.89129	0.181684	77.2991	14.628	0.0131194
1314	2.952	49.7275	20.5807	26.7398	0.0131024
2576	6.34052	3.10075	18.6043	71.9544	0.0128812
2667	44.3239	1.22961	29.2931	25.1534	0.0127055
350	4.78083	1.76513	1.75474	91.6993	0.0125369
2445	34.2654	1.65013	51.0988	12.9856	0.0124784
611	76.629	1.67421	0.154911	21.5419	0.0122953
315	57.2482	18.1168	17.1314	7.50359	0.0122775
766	0.137876	0.0332107	0.0280169	99.8009	0.0118974
130	72.0876	0.739567	0.225972	26.9468	0.0118334
263	45.7582	4.85731	41.4483	7.9362	0.0117372
108	85.6031	1.05001	6.79085	6.55604	0.0116972
898	0.0414861	0.0573587	0.0482966	99.8529	0.0113922
45	45.5535	15.4892	7.70003	31.2573	0.0113485
2440	5.03226	1.32369	72.3716	21.2724	0.0110548
249	95.5321	0.00540199	0.406454	4.05609	0.0110404
770	1.16857	39.9235	3.1811	55.7268	0.0110192
2250	56.324	35.6037	2.5724	5.49991	0.0109385
2767	0	0.155115	30.9668	68.878	0.0107758
580	8.91801	42.4259	38.9918	9.66425	0.0107315
1199	98.7066	0.137868	0.356727	0.798823	0.0102837
194	9.09479	44.648	42.0505	4.20666	0.0100619
1827	3.60231	9.28261	73.7013	13.4138	0.0100086
920	3.01089	23.7512	21.331	51.9069	0.0100068
1250	20.2183	18.7867	50.5609	10.4341	0.00997418
2605	2.56323	0.280295	18.0845	79.072	0.00980815
1255	5.23551	47.5642	28.6377	18.5625	0.00977308
2593	51.0705	6.11948	5.80164	37.0083	0.00966816
536	2.10775	40.0042	6.19465	51.6933	0.00963735
2353	0.180275	0.217877	70.9541	28.6478	0.00958202
2488	4.27459	78.5117	7.19862	10.0151	0.00935611
1161	46.2895	0.549023	40.4924	12.6691	0.00930668
375	53.7381	0.673955	28.0119	17.5761	0.00907593
1825	13.2034	78.8658	4.91328	3.01754	0.00888927
152	26.9425	5.43514	52.492	15.1303	0.00882865
2102	68.3046	1.66773	24.8283	5.19937	0.0088239
2531	13.7979	3.93334	20.7613	61.5075	0.00882304
2492	8.09758	9.69674	60.0147	22.191	0.00867958
404	5.15137	30.9313	31.3191	32.5982	0.00856856
2210	95.1474	1.31857	2.10889	1.42518	0.00849188
2240	10.9812	35.0213	2.99952	50.998	0.00846213
2807	58.7917	0	0	41.2083	0.00846017
2363	1.26512	71.2579	12.6804	14.7966	0.00833846
1774	8.08669	0.0218158	0.0693861	91.8221	0.0083325
588	6.45273	4.98909	12.0743	76.4838	0.00814022
1661	75.0626	0.649159	5.25837	19.0298	0.00813969
1973	0.397596	0.616305	56.1585	42.8276	0.00786968
2312	0.113248	0	0.0153918	99.8714	0.00760572
306	33.3541	50.4985	4.26238	11.8851	0.00760131
1437	7.94104	32.178	26.7827	33.0982	0.00757848
2836	4.54761	4.75445	85.0562	5.64173	0.00744319
1816	43.2872	5.28074	26.2885	25.1435	0.00738733
2413	0.285925	4.58058	48.4941	46.6394	0.00738192
415	19.0446	1.04084	56.0129	23.9017	0.00712301
1594	0.661472	41.8758	16.1267	41.336	0.00699806
2319	0.296359	30.5678	2.83831	66.2975	0.00670617
365	43.4767	0.964968	34.2205	21.3378	0.00663117
796	21.8449	0.0918783	0.0650781	77.9982	0.00657109
1297	98.96	0.19248	0.143409	0.70411	0.00641149
686	96.2608	0.0139394	0.0222688	3.70295	0.00640468
1528	0.773229	31.6275	12.6212	54.9781	0.00632095
379	12.5871	4.01675	26.8256	56.5705	0.0061095
1321	1.08482	0.949509	78.3437	19.622	0.00605605
129	89.3105	0.0393792	5.68119	4.96895	0.00597435
1975	45.806	24.707	0.767857	28.7191	0.00584618
301	7.09767	41.8013	3.42566	47.6754	0.00584033
844	56.5013	7.8523	21.5369	14.1095	0.00578249
1233	0.0815153	1.65642	23.1107	75.1514	0.00556888
675	47.5951	0	0.0534784	52.3514	0.00550033
2886	0.34137	0.550229	8.18478	90.9236	0.00546402
87	23.0317	7.69618	61.783	7.4891	0.00526491
1382	1.15115	0.335724	4.19993	94.3132	0.00494284
213	72.113	0.11554	14.9638	12.8077	0.00493557
2860	5.98764	32.1414	13.0238	48.8471	0.00489371
1578	6.65237	89.2293	2.62359	1.49476	0.00458478
458	9.7563	7.56243	48.5991	34.0822	0.00453448
2770	0	22.0632	7.70135	70.2355	0.00447417
2195	18.2498	13.207	18.8427	49.7005	0.00444843
2473	4.41707	5.18478	14.868	75.5301	0.00436119
307	86.1113	0.354217	2.60666	10.9278	0.00424777
710	19.7633	0.381344	0.152861	79.7025	0.00418728
2769	97.4783	0.0382065	2.09054	0.392943	0.00412446
2587	66.748	0.18882	9.33929	23.7239	0.00412126
2875	72.8533	0	0	27.1467	0.00412011
806	25.9438	53.301	9.57463	11.1806	0.00412004
124	78.7841	0.120924	14.2782	6.81675	0.00410773
316	55.0683	6.08526	28.9884	9.85796	0.00402556
2762	0.45018	7.821	76.2372	15.4916	0.00401852
2463	3.02452	8.83265	29.3435	58.7993	0.00390132
2152	0.528113	3.26	95.3116	0.900247	0.00386309
1143	2.36847	9.64026	14.4183	73.573	0.00383637
223	52.649	6.88029	8.0877	32.383	0.00375639
1211	20.5522	6.87484	19.3256	53.2474	0.00369505
2322	1.54091	32.691	32.9745	32.7936	0.00351292
1747	0.571346	55.8644	39.4815	4.08269	0.00349235
2805	73.5522	3.14246	16.5465	6.75885	0.00348979
114	31.5057	2.68588	54.0437	11.7647	0.00337559
2197	4.50776	1.74627	71.5838	22.1622	0.00336715
1819	0.930846	1.46891	88.6057	8.99452	0.0033292
431	12.5037	0	0	87.4963	0.00332237
2811	18.892	4.45802	42.7688	33.8811	0.00316369
822	30.8447	0	0	69.1553	0.00313974
1878	35.8883	0	0.166989	63.9447	0.00313476
1231	23.1843	0.450435	3.00733	73.3579	0.00309881
1421	65.0261	11.4064	19.4714	4.09608	0.00307414
132	11.3193	0.0226888	0.3833	88.2747	0.00304371
2061	1.79533	20.5651	16.972	60.6676	0.00303821
1024	44.7767	0	1.08025	54.1431	0.00303615
1309	77.2378	0.591208	14.3081	7.86284	0.00297616
2862	7.13792	8.22268	31.2049	53.4345	0.00286626
1868	25.774	0	0	74.226	0.00274899
107	0.428121	80.6124	15.4054	3.55408	0.00274321
452	10.4831	0	0.0810746	89.4358	0.00272372
1318	34.0197	19.7691	37.7022	8.50898	0.00263629
2084	5.92984	68.4368	24.9457	0.687642	0.00259981
1040	18.6755	9.49584	8.07586	63.7529	0.00257922
1025	36.5383	0	0	63.4617	0.0025559
583	9.39152	1.97861	3.13624	85.4936	0.00247116
1213	3.47709	2.93909	35.7643	57.8195	0.00245301
2431	21.8344	31.461	36.6725	10.0321	0.00234897
478	9.53477	8.25769	68.4788	13.7287	0.00230772
1823	59.8022	2.39854	24.7393	13.0599	0.00223992
1631	8.98459	0	0	91.0154	0.0022386
730	65.0633	6.82975	13.8403	14.2667	0.00214069
2894	69.1869	10.9782	1.79496	18.0399	0.00205665
1149	9.66556	24.9251	4.60971	60.7996	0.00204558
2133	1.38081	0.106887	0.363948	98.1483	0.00196633
886	0.4317	7.56519	0.436542	91.5666	0.00193325
1632	85.8111	1.15075	4.90326	8.1349	0.00188799
759	75.1614	0	0.0587293	24.7798	0.00186914
2831	0.0186693	0.06518	0.257739	99.6584	0.00177549
2671	5.41162	1.30046	20.674	72.6139	0.00177382
2801	18.7667	6.89303	31.4126	42.9277	0.00169057
1920	82.0263	1.98525	4.70669	11.2818	0.00168519
140	7.32599	2.1159	13.3064	77.2517	0.00168349
681	98.0592	0.86238	0.795117	0.283258	0.0016742
760	5.04222	0	0.0393774	94.9184	0.00164669
1348	0.121523	0	0.0568742	99.8216	0.00163907
2442	0.106212	98.9334	0.741057	0.219322	0.00163024
888	0	0	1.54286	98.4571	0.00158373
2301	20.3417	7.32446	17.9058	54.428	0.00158235
765	6.08875	2.73685	0.105673	91.0687	0.00147862
1460	53.4227	1.74131	6.18714	38.6489	0.00141825
1473	94.1427	0.385173	2.19778	3.27431	0.00140427
529	0.683639	94.3793	0.934053	4.00302	0.001393
820	39.8751	0	0	60.1249	0.00131795
2462	4.0988	14.9307	3.5175	77.453	0.00126293
1279	12.6786	2.32963	14.5986	70.3931	0.00122365
2149	1.34156	2.63066	38.9402	57.0876	0.00120312
1688	95.0491	1.47018	1.55352	1.92718	0.00113833
251	76.521	2.04199	1.94451	19.4925	0.00112083
2837	9.2351	2.13997	56.8946	31.7303	0.00102932
2834	17.5939	0	0	82.4061	0.00100891
2975	2.23477	0.247568	0.18897	97.3287	0.0009678
2594	58.5728	7.0806	16.2005	18.1461	0.000955738
729	25.3201	0	0	74.6799	0.000921525
487	1.92564	1.66666	12.858	83.5497	0.000846588
363	2.13216	1.96946	3.70236	92.196	0.000843058
1538	1.26112	10.2167	82.7187	5.80349	0.000839869
1771	2.75036	1.20357	74.7646	21.2815	0.000836192
429	13.3013	0	0	86.6987	0.000819111
2661	3.20426	0	0	96.7957	0.000813555
2821	24.9642	0	0	75.0358	0.000782346
1815	4.37309	1.40534	93.716	0.505543	0.000777736
1587	37.5583	0.221068	6.35526	55.8653	0.000777317
2268	7.54861	0.0229813	0.133536	92.2949	0.000775821
2711	31.9573	0	0	68.0427	0.000764294
2364	13.9576	9.83751	20.41	55.7949	0.000744483
1123	95.7197	0.324177	1.73894	2.21721	0.000740936
531	1.15494	0.255032	0.204275	98.3858	0.000737659
2672	55.3247	5.01318	27.2295	12.4327	0.000710058
2898	7.28355	6.96483	37.3947	48.3569	0.000707397
2399	4.61863	35.7585	47.3678	12.2551	0.000707301
2291	11.532	4.86472	79.105	4.49825	0.000699234
772	31.6357	0	0.114487	68.2498	0.000693316
437	9.74965	0	0	90.2503	0.000686436
245	5.36405	0	0	94.636	0.00068434
2670	24.7496	17.9324	42.0992	15.2188	0.00066716
1550	95.5786	0.207391	1.73999	2.47402	0.000661068
433	3.51955	0	0	96.4804	0.00065628
2228	51.1634	4.96429	22.5924	21.2799	0.000641427
749	5.93614	0	0	94.0639	0.000624367
1141	4.63876	10.3901	14.3953	70.5759	0.000605991
762	72.3059	0	0	27.6941	0.000597781
2194	0.800575	6.22985	73.4707	19.4988	0.000593478
1124	0.671281	6.86072	57.3344	35.1336	0.000589877
2708	57.564	0	0.135536	42.3005	0.000574248
579	22.5453	0	49.8132	27.6415	0.000552698
2032	4.03626	1.20009	84.0622	10.7014	0.00054398
883	11.5003	1.10076	2.50359	84.8953	0.000518982
39	64.98	0	0.801549	34.2185	0.000511661
788	38.1208	0	0	61.8792	0.000508181
149	15.1177	0	0	84.8823	0.000508009
1921	1.34903	1.24036	4.80903	92.6016	0.000505264
2189	2.68361	0.606852	0.812643	95.8969	0.000487047
4	2.41824	6.41638	85.8035	5.36185	0.000478329
1312	86.5897	0.340445	0.8482	12.2217	0.000477099
1741	14.1737	16.4272	19.1319	50.2672	0.000473726
254	95.3035	0	4.51803	0.178421	0.00047173
2709	61.3068	0	0	38.6932	0.000471255
2842	92.9688	4.35691	1.18591	1.48835	0.000469412
2710	15.7733	0	0	84.2267	0.000456121
704	34.0981	0	0	65.9019	0.000454243
813	9.11462	0	0.210848	90.6745	0.00043899
471	24.0414	30.6911	17.5957	27.6718	0.000436963
1686	0	0	0	100	0.000426705
752	88.4049	0.110452	1.39453	10.0901	0.000420314
787	6.51759	0	0	93.4824	0.00041856
758	13.2505	0	0.539424	86.2101	0.000393561
2209	0.805569	0	40.2758	58.9186	0.000390712
1240	0.708848	0.229027	40.9255	58.1366	0.000376256
684	1.48349	2.27544	0.351651	95.8894	0.000373654
930	89.2678	1.96296	2.41397	6.3553	0.000369648
966	58.1424	5.31164	13.1897	23.3563	0.000367982
1754	5.31664	2.74079	84.072	7.87052	0.000350901
731	19.6006	8.45382	45.7743	26.1713	0.00034088
6	6.57342	0.202152	5.71347	87.511	0.000331898
584	11.0481	0.395925	5.51821	83.0378	0.000327258
2246	52.576	0.413459	16.6743	30.3362	0.000325559
1659	4.01816	0	58.8602	37.1217	0.000321417
2979	22.8493	0	0	77.1507	0.000318157
2825	0	0	0	100	0.000308795
1870	0	0	0	100	0.000288086
838	39.2166	0	0.422715	60.3606	0.000285757
1758	2.2413	0.205486	2.62607	94.9271	0.000283084
500	2.19548	4.41282	1.41546	91.9762	0.00028189
2154	18.0035	0.631013	39.1722	42.1933	0.000280289
1663	2.66639	9.54234	9.33709	78.4542	0.000277145
795	52.5443	0	0.804872	46.6509	0.000275364
1562	2.69975	0.72487	76.2581	20.3173	0.00026083
2560	48.6275	0.717793	49.9938	0.660948	0.000260015
868	10.6	2.77129	83.0366	3.59209	0.000256662
2260	92.7233	4.49633	2.24508	0.535237	0.000255353
368	3.21766	41.0199	33.0274	22.7351	0.000252873
2225	8.49168	22.8333	0.120299	68.5547	0.00024698
153	0.157618	0.513347	86.5556	12.7734	0.00024546
1871	0	0	0	100	0.000240168
2150	7.89957	27.0877	50.7735	14.2393	0.000236019
2771	0	1.78974	11.6249	86.5853	0.000233602
2627	4.52628	0	0	95.4737	0.00023314
746	49.6367	14.1431	16.3883	19.8319	0.000225446
1289	61.294	0.442977	1.42657	36.8365	0.000215019
2522	0.737656	28.4391	40.5772	30.246	0.000205327
93	0.355933	0.798986	84.3588	14.4863	0.000199665
236	10.5527	17.2687	6.37703	65.8016	0.000178751
915	51.8903	0	42.6369	5.47284	0.000174903
2682	9.15823	3.47025	28.9612	58.4103	0.000174495
2596	43.0369	1.11935	24.1374	31.7063	0.000174298
1574	5.81123	57.0297	25.3329	11.8262	0.000171082
2063	18.8849	0	1.31196	79.8032	0.000169552
2165	81.4418	11.5486	2.19429	4.81529	0.000166533
2551	0.782125	78.4801	19.4875	1.2503	0.000164706
2666	25.045	0.908152	12.1947	61.8522	0.000160376
1296	2.46096	0	8.61921	88.9198	0.000159324
425	0	0	0	100	0.000158098
2234	77.9522	0	0	22.0478	0.000155815
1084	23.6893	4.22876	50.1542	21.9277	0.000145728
1673	2.15323	5.20908	17.7645	74.8732	0.000142761
1252	17.0772	0	14.5322	68.3906	0.000140598
489	0	0	1.01543	98.9846	0.000133121
835	2.11454	2.79839	12.2265	82.8605	0.000127767
435	65.7425	0	0	34.2575	0.000127326
2829	17.4144	8.20073	44.3354	30.0495	0.000125969
351	36.0333	11.8185	4.5935	47.5547	0.000124978
1919	16.7112	1.07284	79.0826	3.13338	0.000124096
168	6.95006	0.452884	31.6321	60.965	0.000103683
176	64.1222	0.740735	23.7562	11.3808	0.000102349
2013	27.1503	0	2.19344	70.6563	0.000101189
2398	21.3083	0.29872	68.0637	10.3293	9.89487e-05
1385	36.9949	7.01958	49.112	6.8735	9.64779e-05
1398	27.0561	3.40095	2.87241	66.6705	9.59384e-05
72	2.91902	4.40126	74.6328	18.0469	9.38542e-05
2542	1.478	65.3744	5.67937	27.4682	9.16076e-05
2191	6.36824	36.5661	15.1037	41.962	9.15145e-05
1514	49.5345	0	0.490014	49.9755	9.14003e-05
963	3.32087	17.4931	74.67	4.51606	9.06299e-05
1316	1.69907	0	1.43749	96.8634	9.01738e-05
768	1.41769	9.44	77.4527	11.6896	8.87593e-05
939	7.84016	78.3352	7.66953	6.15513	8.50114e-05
2589	4.44556	14.204	63.969	17.3815	8.41128e-05
1660	52.65	8.93325	37.4225	0.994163	8.28801e-05
2406	6.16873	43.2838	43.511	7.03648	8.09391e-05
304	7.27747	0.380942	33.0632	59.2784	7.89661e-05
1368	0.517275	0	96.4795	3.00319	7.88375e-05
1193	23.8529	6.85035	52.2219	17.0748	7.87156e-05
2318	12.5898	0.856328	47.5811	38.9728	7.70794e-05
1164	16.0742	10.2348	28.7464	44.9445	7.41369e-05
360	8.34311	53.2759	16.8876	21.4935	7.3622e-05
2500	0.661054	34.4429	16.6812	48.2148	7.25832e-05
46	47.7782	18.0752	10.7537	23.393	7.25457e-05
602	23.8575	6.70348	24.3477	45.0914	7.00039e-05
1966	10.9224	12.4894	53.4277	23.1605	6.99149e-05
2092	0	0	13.0694	86.9306	6.70101e-05
518	20.1445	29.6125	19.8406	30.4025	6.66131e-05
1420	34.8681	2.12756	27.4265	35.5778	6.63353e-05
1139	8.91364	0	8.33334	82.753	6.5892e-05
987	75.2101	0	1.14776	23.6422	6.57665e-05
1045	84.0699	2.56637	3.76258	9.60114	6.56893e-05
2270	7.85781	46.9352	32.6326	12.5744	6.55051e-05
295	16.8135	3.61074	10.3283	69.2475	6.5024e-05
1760	40.4769	0	5.67931	53.8438	6.43453e-05
396	38.7989	5.9062	3.72006	51.5748	6.40042e-05
1748	7.2843	10.1188	14.7578	67.8391	6.36791e-05
499	40.0584	2.58111	11.9122	45.4483	6.22459e-05
688	20.1722	16.5429	37.3028	25.982	6.22177e-05
1636	6.84232	54.0485	2.63145	36.4777	5.92816e-05
2550	29.9636	3.48562	57.1702	9.38055	5.79637e-05
465	14.0346	32.1087	29.364	24.4927	5.70921e-05
1588	11.828	10.9249	4.12039	73.1267	5.70818e-05
1668	0	57.2249	41.8849	0.890128	5.69957e-05
1444	81.917	2.86886	9.17916	6.03494	5.65226e-05
382	21.0939	3.98805	54.613	20.3051	5.64361e-05
390	11.4497	0	2.12155	86.4287	5.63502e-05
790	16.535	3.80154	44.9748	34.6887	5.50515e-05
1	10.9664	15.7446	53.3498	19.9392	5.49719e-05
1243	6.51804	14.4263	43.2583	35.7973	5.49411e-05
2504	3.85872	90.034	6.10726	0	5.36929e-05
302	24.8358	5.37684	6.76488	63.0225	5.24999e-05
968	90.893	1.08596	4.85072	3.17028	5.22314e-05
326	27.1482	1.81127	5.73922	65.3013	5.11307e-05
2324	5.72868	2.65988	42.0817	49.5297	5.11018e-05
828	62.71	11.3285	14.1714	11.7901	5.07858e-05
31	48.7623	10.7156	12.1054	28.4168	5.06949e-05
2606	39.5635	24.8716	33.1908	2.37413	5.02043e-05
2573	0	13.8203	74.4038	11.7759	5.01786e-05
1136	3.20788	1.41673	19.5506	75.8248	4.98088e-05
141	14.3626	68.8487	10.7555	6.03324	4.97462e-05
138	25.1365	15.3184	26.4648	33.0804	4.92906e-05
572	44.6098	19.2373	33.4139	2.739	4.92157e-05
71	9.06418	37.0088	26.6493	27.2777	4.90136e-05
2823	57.5451	7.11013	20.7131	14.6316	4.83702e-05
240	45.1844	0	1.11787	53.6977	4.81158e-05
2558	13.3348	0	74.9872	11.678	4.79812e-05
388	0	1.77194	93.5702	4.65784	4.76328e-05
2547	3.42009	38.6337	53.6534	4.29283	4.63331e-05
525	58.3675	15.9805	16.2887	9.36323	4.60335e-05
2633	33.0516	1.08832	45.3613	20.4987	4.59822e-05
115	61.72	1.25022	16.2505	20.7793	4.35471e-05
497	2.00952	15.4026	18.1891	64.3988	4.35388e-05
215	12.8777	0	27.2408	59.8815	4.34607e-05
170	22.9023	14.3955	6.59514	56.1071	4.3101e-05
30	63.6914	2.40075	23.5574	10.3504	4.30695e-05
2600	59.3024	3.63554	7.87328	29.1888	4.29367e-05
2217	43.2658	0	16.751	39.9832	4.26959e-05
2089	13.3809	0	72.7148	13.9044	4.24133e-05
1210	41.4759	3.9337	37.355	17.2354	4.21964e-05
2668	37.226	6.56582	16.2308	39.9773	4.18701e-05
193	30.5051	3.69567	13.7886	52.0106	4.14871e-05
1172	0	0	96.3629	3.6371	4.10058e-05
369	0	0	71.5752	28.4248	4.03578e-05
18	22.1618	7.50014	60.5101	9.82794	3.98623e-05
514	10.227	0	56.7946	32.9783	3.95151e-05
401	82.3624	0	9.81103	7.82653	3.91816e-05
2609	10.2136	34.9349	42.6088	12.2427	3.89329e-05
496	78.0005	0	13.2326	8.76688	3.83997e-05
2548	71.9942	7.05477	14.8247	6.12627	3.80367e-05
177	0	4.98558	71.1835	23.831	3.79083e-05
774	74.1801	0	5.78504	20.0349	3.73167e-05
17	7.79452	11.1035	40.747	40.3549	3.6328e-05
3	7.00518	11.603	61.9261	19.4658	3.57936e-05
802	44.2121	4.12639	47.6633	3.99815	3.55851e-05
1839	21.3521	0	18.0796	60.5682	3.50563e-05
1320	2.85742	4.99124	34.4225	57.7289	3.47696e-05
2254	69.6711	0	19.0352	11.2937	3.4446e-05
244	59.0986	1.58245	8.22771	31.0912	3.38215e-05
185	56.0172	8.27281	15.6124	20.0976	3.37877e-05
248	9.96954	44.3049	26.7595	18.9661	3.35794e-05
1744	42.3581	0	20.2772	37.3647	3.34265e-05
1718	0	0	98.9932	1.00677	3.34195e-05
2408	5.7688	7.38953	80.6397	6.20193	3.33612e-05
135	6.36981	38.741	44.5672	10.322	3.33285e-05
2130	14.6236	4.72856	58.0669	22.5809	3.31753e-05
2064	15.9792	14.4102	27.45	42.1607	3.30286e-05
217	33.1583	44.5171	16.332	5.99262	3.28397e-05
201	30.3974	9.70314	48.5678	11.3316	3.27178e-05
2557	57.2872	5.95425	36.1046	0.653902	3.25974e-05
361	13.0352	83.1541	3.81068	0	3.17361e-05
2	32.5208	12.5044	24.2263	30.7486	3.16473e-05
2527	4.00991	2.0209	71.7907	22.1785	3.10173e-05
1242	33.9292	18.2077	37.9688	9.89434	3.03787e-05
636	26.2625	3.9041	48.9906	20.8428	3.00242e-05
2571	40.7993	0	55.7194	3.48123	2.95568e-05
847	29.8073	22.8311	8.7774	38.5842	2.95104e-05
1799	14.8675	21.4437	12.5119	51.1769	2.90547e-05
526	70.9504	2.06081	23.1973	3.79153	2.89462e-05
694	0	0	41.7774	58.2226	2.86434e-05
7	15.2548	6.29083	19.2758	59.1786	2.85455e-05
1751	36.9271	0	5.40103	57.6719	2.8388e-05
449	1.86877	2.40351	0	95.7277	2.80266e-05
637	23.4374	29.313	19.0997	28.1499	2.8007e-05
2598	88.9482	0	4.53183	6.51994	2.78607e-05
1447	50.3114	1.76043	10.1773	37.7508	2.78043e-05
63	8.37262	14.5402	22.3847	54.7025	2.76937e-05
1023	11.262	31.5174	23.2912	33.9295	2.76593e-05
2508	11.0703	60.4833	7.62891	20.8176	2.74924e-05
1157	4.85441	17.9015	24.0361	53.2081	2.70175e-05
358	63.67	0	18.4258	17.9042	2.6495e-05
2515	38.2797	46.8656	3.87372	10.981	2.64243e-05
929	32.0993	0	17.8459	50.0549	2.63677e-05
28	65.7013	4.80562	18.2357	11.2575	2.59974e-05
1598	27.3018	0	13.2623	59.4359	2.59786e-05
1445	32.76	36.0225	20.4723	10.7452	2.56227e-05
1536	12.723	43.711	14.176	29.39	2.54972e-05
833	17.9688	0	24.9123	57.1189	2.54709e-05
2233	39.5371	0	23.3969	37.066	2.53669e-05
676	23.0688	12.4826	47.6467	16.8019	2.53234e-05
2539	5.98245	10.8983	46.9324	36.1869	2.52332e-05
578	66.9085	0	11.2718	21.8197	2.51254e-05
1207	22.0892	55.5959	16.4614	5.8534	2.49501e-05
2350	21.5227	65.9791	0	12.4982	2.49486e-05
2538	33.3861	18.9489	17.9481	29.7168	2.4932e-05
1135	7.7204	3.42706	35.9588	52.8937	2.48792e-05
381	30.0424	2.0971	22.323	45.5375	2.47521e-05
1513	0	36.5832	51.0545	12.3623	2.45865e-05
2175	60.2738	31.4228	5.56664	2.73679	2.44296e-05
237	1.28545	0	56.2162	42.4983	2.43224e-05
134	16.5752	19.3378	49.8538	14.2332	2.43089e-05
985	7.58694	32.6079	12.9766	46.8287	2.41999e-05
1593	72.4723	16.3031	6.79778	4.42681	2.41555e-05
782	8.71491	55.5209	6.44466	29.3195	2.40712e-05
2896	22.0474	0	12.0885	65.8641	2.38078e-05
1626	19.7824	0	36.0323	44.1853	2.32746e-05
2134	74.1662	0	9.06279	16.771	2.32626e-05
354	5.24201	4.74482	27.2191	62.7941	2.31296e-05
918	14.4719	64.3059	16.1722	5.05004	2.30171e-05
571	2.65825	12.2063	75.562	9.57345	2.29532e-05
850	28.6199	7.53327	51.0753	12.7715	2.29431e-05
946	14.1002	27.692	34.5945	23.6134	2.27943e-05
342	12.0259	0	73.1277	14.8465	2.27821e-05
283	19.8968	8.82465	12.3827	58.8959	2.27684e-05
618	56.7723	0	12.4914	30.7364	2.26268e-05
1249	65.7115	20.4981	8.026	5.76434	2.25607e-05
1739	20.2124	4.20632	39.6391	35.9422	2.24409e-05
2437	9.39235	13.7425	61.6081	15.257	2.21601e-05
33	9.2735	31.0601	13.2142	46.4523	2.19949e-05
345	21.6713	16.6943	21.4921	40.1423	2.19755e-05
1442	16.0513	42.815	9.89494	31.2387	2.17231e-05
1798	25.3476	5.55838	59.553	9.54104	2.17188e-05
2038	45.7577	23.4929	15.4749	15.2745	2.15271e-05
313	29.5277	5.16212	41.1633	24.1469	2.14494e-05
2577	57.9834	0	2.79226	39.2244	2.12869e-05
2458	6.80834	2.67514	79.6168	10.8997	2.10918e-05
1947	2.31135	0	63.2285	34.4602	2.08583e-05
23	10.1292	2.61956	46.2758	40.9754	2.07705e-05
1627	54.2862	2.34881	10.0556	33.3094	2.0767e-05
234	25.8227	0	57.182	16.9952	2.06114e-05
2477	60.7218	0	16.6	22.6783	2.0606e-05
1952	1.35689	3.84545	61.2758	33.5219	2.05711e-05
406	9.06004	0	11.6229	79.3171	2.00176e-05
1719	13.9674	51.0206	33.2478	1.7642	1.97281e-05
1409	3.78051	15.0241	10.0544	71.141	1.96304e-05
2383	32.7826	5.84192	11.9605	49.415	1.9606e-05
2662	9.26591	0	8.64321	82.0909	1.95728e-05
455	82.0898	5.70418	4.73066	7.4754	1.95621e-05
498	61.8132	1.49452	21.1672	15.5251	1.94715e-05
2327	0	0	77.3088	22.6912	1.93923e-05
2707	38.1909	0	3.93154	57.8775	1.93064e-05
158	6.30676	37.8418	15.0238	40.8277	1.90707e-05
884	15.7116	2.65793	33.2535	48.377	1.89249e-05
1457	6.45316	8.09345	40.4037	45.0496	1.88913e-05
314	8.44393	37.3736	37.4627	16.7197	1.87834e-05
2498	14.6347	1.18338	63.7667	20.4153	1.87714e-05
257	16.1815	3.68401	58.1418	21.9926	1.87642e-05
51	24.6263	0	25.7412	49.6325	1.87384e-05
2813	34.5287	0	61.8844	3.58689	1.86984e-05
448	18.5338	20.5306	36.1789	24.7568	1.8688e-05
1288	14.9089	0	6.07637	79.0147	1.86307e-05
112	5.6689	15.4704	75.0802	3.78048	1.85925e-05
2528	59.7589	0	37.9787	2.26241	1.8577e-05
126	22.2816	18.6469	21.3003	37.7713	1.84515e-05
2482	25.2225	57.6927	13.4213	3.66355	1.84333e-05
450	9.63795	6.52873	10.8827	72.9506	1.83437e-05
37	43.8886	17.4754	18.6777	19.9583	1.81761e-05
366	42.029	0	56.2106	1.76048	1.79426e-05
1029	20.3225	0	72.8487	6.82879	1.76501e-05
666	11.3719	0	16.1783	72.4499	1.76268e-05
2170	11.6409	59.3668	16.7302	12.2621	1.75925e-05
2890	56.0046	0	0	43.9954	1.75276e-05
1256	35.1919	3.78629	58.005	3.01686	1.73781e-05
761	20.7499	7.99031	45.806	25.4538	1.73613e-05
1167	54.5047	2.19487	14.9417	28.3587	1.73184e-05
917	30.9583	14.9483	21.9423	32.1511	1.71813e-05
1208	8.7844	4.02429	54.4309	32.7604	1.71617e-05
2407	45.8641	9.06705	42.4514	2.61745	1.70176e-05
2604	35.1107	0	48.2628	16.6266	1.69976e-05
262	4.36272	60.8623	16.9876	17.7874	1.69769e-05
2524	54.4763	2.82678	15.2906	27.4062	1.69161e-05
162	50.9812	27.0643	15.4062	6.54828	1.68141e-05
1545	68.6221	0	13.5835	17.7944	1.66639e-05
402	25.1851	4.0516	5.07184	65.6914	1.65947e-05
516	49.1586	4.14607	41.65	5.04531	1.65532e-05
163	5.29767	13.8775	16.2777	64.5471	1.65481e-05
2512	3.04972	86.5583	5.29591	5.09607	1.65384e-05
2843	18.4785	0	21.5457	59.9758	1.65345e-05
2546	0	41.4032	43.9491	14.6476	1.65315e-05
2505	0	12.5014	72.1203	15.3783	1.63765e-05
612	70.4048	0	6.48457	23.1106	1.63498e-05
288	17.475	21.4277	11.542	49.5553	1.63293e-05
340	37.3634	19.4544	15.0399	28.1424	1.62863e-05
2377	0	24.6027	67.0986	8.29869	1.62502e-05
2506	7.35385	34.8222	26.7553	31.0687	1.61315e-05
1165	43.1583	0	11.5871	45.2546	1.60749e-05
2719	9.3186	7.95649	75.8077	6.91722	1.59846e-05
1701	31.182	0	47.1909	21.6271	1.57807e-05
2309	2.2191	62.2687	22.3428	13.1694	1.55897e-05
1492	7.7618	80.2837	9.75123	2.20329	1.53551e-05
2555	18.486	0	37.5944	43.9196	1.53341e-05
1408	12.2884	5.16367	37.5017	45.0463	1.52828e-05
2581	14.1843	68.0306	5.75714	12.0279	1.52801e-05
2067	47.3744	9.6392	20.5574	22.429	1.52622e-05
2644	6.83469	5.56101	69.5304	18.0739	1.52393e-05
82	14.6661	5.84616	63.8266	15.6611	1.51734e-05
2457	22.0559	0	65.3951	12.549	1.51241e-05
323	21.3316	6.8295	2.40357	69.4353	1.50801e-05
2171	7.47982	0	78.3662	14.154	1.50759e-05
1397	30.4304	0	16.5927	52.9769	1.50548e-05
2535	34.2157	0	58.8604	6.92394	1.5023e-05
2313	10.6877	2.93492	74.4983	11.8791	1.49782e-05
2575	20.2937	9.65805	57.805	12.2432	1.49163e-05
2534	76.4278	0	9.64684	13.9254	1.49095e-05
155	2.85418	35.9706	17.633	43.5422	1.48375e-05
79	28.561	8.27852	29.481	33.6795	1.48082e-05
113	34.0776	2.17094	50.4838	13.2676	1.47833e-05
139	27.4247	31.5741	7.39626	33.605	1.47502e-05
2325	0	0	41.439	58.561	1.47319e-05
2626	53.9489	38.838	7.21311	0	1.45932e-05
1720	2.04164	0	75.1794	22.779	1.45786e-05
2258	10.9315	25.027	55.0773	8.96425	1.4564e-05
385	29.075	6.8162	31.6822	32.4266	1.45481e-05
964	17.6176	0	37.649	44.7334	1.45129e-05
216	7.33091	1.48427	15.3196	75.8652	1.45125e-05
495	29.9382	0	9.1516	60.9102	1.44677e-05
1949	6.31466	0	32.948	60.7373	1.44023e-05
2503	10.1638	2.77281	65.2073	21.8561	1.43486e-05
5	58.4916	0	7.98447	33.524	1.43199e-05
785	8.3722	4.49863	0	87.1292	1.42524e-05
2533	10.2564	19.1967	63.1266	7.42029	1.42319e-05
986	13.3308	2.45722	63.0068	21.2052	1.41917e-05
2100	0	7.40885	89.7456	2.84558	1.4165e-05
2310	59.1722	0	5.29711	35.5307	1.40769e-05
596	14.6994	43.2827	28.585	13.4329	1.40615e-05
2128	9.97746	2.96654	9.02474	78.0313	1.40236e-05
2588	18.0804	13.6578	64.9332	3.32852	1.40098e-05
2653	61.4957	14.9867	7.56199	15.9556	1.39284e-05
2016	0	0	54.2739	45.7261	1.39224e-05
1463	9.38254	41.1418	12.9736	36.502	1.38359e-05
2136	74.8188	0	0	25.1812	1.37078e-05
1454	16.9448	30.9464	16.9657	35.1431	1.35236e-05
1580	30.5394	0	53.9922	15.4684	1.34524e-05
1542	42.4509	24.6832	8.77663	24.0892	1.33405e-05
1009	3.06825	0	20.9278	76.004	1.33024e-05
20	8.23526	2.30583	43.7267	45.7322	1.32957e-05
989	0	3.30598	76.7949	19.8991	1.32875e-05
2307	64.6425	0	31.7358	3.6217	1.32744e-05
2251	8.31368	48.1799	41.7419	1.76445	1.32479e-05
233	20.1066	27.9044	21.6911	30.2978	1.31998e-05
2241	24.9471	34.4492	4.69438	35.9092	1.31952e-05
1658	37.7976	34.3892	19.3442	8.46901	1.31892e-05
317	60.0251	2.54281	16.9895	20.4426	1.31029e-05
1766	9.52019	6.89202	57.6559	25.9319	1.31018e-05
70	30.6477	40.3842	19.4301	9.53805	1.30773e-05
2663	28.5429	22.3693	6.61903	42.4688	1.30619e-05
2549	16.1279	0	63.454	20.4181	1.29828e-05
2090	1.72458	0	0	98.2754	1.29651e-05
143	3.56449	30.7208	58.9327	6.78195	1.29299e-05
1337	75.9393	18.5518	5.50887	0	1.29095e-05
2878	71.6208	0	7.33825	21.0409	1.28197e-05
1657	24.9254	0	22.6189	52.4557	1.28121e-05
1035	0	0	3.83406	96.1659	1.28048e-05
181	26.9823	3.08797	14.7146	55.2151	1.27953e-05
1087	7.98611	18.567	12.5213	60.9256	1.27655e-05
446	7.14597	7.35777	63.3963	22.1	1.2753e-05
2572	39.2405	28.3393	12.1953	20.2249	1.27525e-05
2879	3.90551	24.5272	36.496	35.0713	1.26643e-05
1082	0	17.404	9.64206	72.9539	1.26539e-05
2212	0	72.2661	18.638	9.09591	1.25965e-05
941	35.1134	19.1786	45.7079	0	1.25649e-05
399	21.4292	0	0	78.5708	1.25157e-05
544	1.96879	0	78.8402	19.191	1.23962e-05
1609	0	28.1968	5.92921	65.874	1.23945e-05
305	43.3489	0	32.9106	23.7405	1.23456e-05
2537	63.0882	3.47947	10.1509	23.2814	1.2332e-05
613	12.8842	35.1218	6.74652	45.2475	1.21952e-05
1928	35.3628	0	30.5111	34.1261	1.21783e-05
2385	32.6042	0	67.3958	0	1.21111e-05
2554	37.1403	30.3728	23.3054	9.18147	1.21069e-05
2601	45.9015	0	26.3313	27.7671	1.20851e-05
29	25.6682	11.2613	14.127	48.9435	1.20556e-05
2248	6.99919	3.46996	7.25776	82.2731	1.19874e-05
1607	14.3471	20.0257	56.9303	8.69678	1.18671e-05
69	47.4153	22.8913	10.4705	19.2229	1.18378e-05
44	5.95326	23.7512	46.8597	23.4358	1.1804e-05
922	6.69501	0	32.8584	60.4466	1.17954e-05
2381	10.1594	45.4852	12.2172	32.1382	1.17948e-05
2188	21.4666	0	65.7219	12.8116	1.17136e-05
2283	5.89278	0	91.4637	2.64355	1.17125e-05
2514	66.3134	0	19.8946	13.792	1.16951e-05
403	2.29957	0	0	97.7004	1.16024e-05
1431	18.9837	60.1627	7.68406	13.1696	1.15702e-05
2574	27.8157	14.7993	8.56141	48.8236	1.15576e-05
1809	23.4671	9.18614	38.8321	28.5146	1.15051e-05
154	56.8378	27.3064	1.1258	14.7301	1.1493e-05
1032	0	0	11.6632	88.3368	1.14616e-05
1451	34.7197	22.6662	24.3927	18.2214	1.14581e-05
2525	33.1315	0	35.1868	31.6817	1.1414e-05
2536	17.9482	41.767	22.6912	17.5936	1.13513e-05
2455	25.4168	0	0	74.5832	1.13462e-05
1458	34.8467	7.48347	19.7586	37.9112	1.13293e-05
1539	26.4117	40.2454	25.0177	8.32519	1.12395e-05
81	31.3058	0	7.20901	61.4852	1.12367e-05
1640	16.1469	21.7939	45.9603	16.0988	1.12201e-05
292	6.36262	1.82679	65.7999	26.0106	1.12019e-05
1850	86.911	0	13.089	0	1.11726e-05
2471	0	8.53872	91.4613	0	1.10876e-05
1399	7.65012	3.24633	60.1607	28.9428	1.09489e-05
695	8.30076	5.03652	22.5406	64.1221	1.09162e-05
255	33.8805	0	19.9112	46.2083	1.07909e-05
1715	14.3041	0	78.1439	7.55202	1.06538e-05
2578	62.6565	0	14.7317	22.6118	1.05942e-05
2205	42.9283	5.15772	12.0273	39.8867	1.05909e-05
933	42.1271	0	14.3053	43.5676	1.04675e-05
145	0	25.0757	17.6604	57.2639	1.04203e-05
585	24.1408	10.5927	13.9073	51.3591	1.04185e-05
1968	71.6637	0	7.73988	20.5964	1.03527e-05
1745	0	0	61.3225	38.6775	1.0312e-05
1933	9.20444	67.3052	23.4904	0	1.02341e-05
2348	47.2922	0	42.5818	10.126	1.02176e-05
864	54.5578	2.7797	11.8187	30.8438	1.02129e-05
1674	91.1492	0	1.7724	7.07838	1.02064e-05
1257	18.3172	14.7513	58.0732	8.85838	1.01721e-05
1248	22.0221	0	33.3726	44.6053	1.00868e-05
2315	56.303	6.94414	2.99548	33.7574	1.00832e-05
2384	0	17.9356	72.6344	9.42993	1.00459e-05
1711	4.21274	60.4264	23.4718	11.889	1.00012e-05
373	40.8913	6.33464	28.3124	24.4616	9.98112e-06
1612	10.1929	51.1295	9.5978	29.0798	9.84451e-06
439	31.8986	13.1725	44.3406	10.5882	9.8391e-06
923	30.4265	32.9921	9.37063	27.2107	9.80974e-06
1452	8.25069	35.0478	11.8435	44.858	9.80244e-06
67	39.7092	9.46956	10.5422	40.279	9.76727e-06
2502	67.1271	5.15724	21.0243	6.69136	9.6829e-06
347	10.3933	54.6225	17.6385	17.3458	9.6575e-06
2830	9.14962	8.72035	5.6241	76.5059	9.65166e-06
105	14.5663	0	11.7084	73.7253	9.59179e-06
1259	30.2811	66.5872	0	3.1317	9.58812e-06
195	14.005	12.747	11.0877	62.1603	9.57141e-06
2380	0	7.72926	64.8305	27.4402	9.56567e-06
505	14.9777	10.9099	0	74.1124	9.53411e-06
1081	25.371	9.51729	0	65.1117	9.50947e-06
553	7.57228	0	48.1582	44.2695	9.49218e-06
43	14.1932	6.77673	59.7666	19.2635	9.48025e-06
1540	59.4583	0	28.9963	11.5454	9.391e-06
2643	8.06855	0	56.112	35.8194	9.3791e-06
2316	12.785	10.6844	24.2853	52.2452	9.36673e-06
2294	7.85274	8.54059	64.4244	19.1823	9.3558e-06
1681	60.6776	23.3078	16.0146	0	9.27755e-06
2501	0	18.7771	75.2819	5.94105	9.24672e-06
2516	62.1226	12.7155	8.14915	17.0127	9.22495e-06
66	7.45239	27.7002	48.8501	15.9974	9.20679e-06
47	26.2181	11.886	31.5051	30.3908	9.19643e-06
2582	9.8808	50.5061	8.85267	30.7605	9.19324e-06
2559	76.0171	0	9.26152	14.7214	9.18854e-06
2213	9.53439	66.251	15.4146	8.80002	9.14435e-06
1617	38.3565	16.2139	22.4615	22.9681	9.11446e-06
599	29.1816	2.76672	24.2329	43.8188	9.1112e-06
2776	0	0	19.2331	80.7669	9.07903e-06
952	35.7518	11.9578	30.4497	21.8408	9.05903e-06
371	51.6488	20.4427	3.6791	24.2294	9.04701e-06
398	0	35.8342	26.3599	37.8059	9.03524e-06
1443	15.5212	0	80.3846	4.09418	8.94634e-06
2203	67.3538	0	14.884	17.7622	8.88158e-06
2507	0	13.4401	20.2567	66.3031	8.77729e-06
1030	33.7232	11.3925	41.835	13.0492	8.75562e-06
1959	75.2631	3.55903	21.1779	0	8.75056e-06
259	20.0043	0	44.1266	35.869	8.73677e-06
1051	14.1989	15.8402	63.3657	6.59522	8.63883e-06
881	0	54.9953	26.1246	18.8801	8.63371e-06
2892	13.2421	0	47.3193	39.4386	8.63366e-06
1797	34.2474	27.6727	7.93875	30.1412	8.61744e-06
1057	35.8078	16.5179	25.6032	22.071	8.59391e-06
159	11.4512	0	74.5902	13.9586	8.56181e-06
2221	0	59.723	24.8002	15.4768	8.55987e-06
2511	14.0399	0	39.2778	46.6823	8.531e-06
1284	0	35.7095	23.6238	40.6667	8.51926e-06
2220	31.5845	0	4.8106	63.6049	8.47627e-06
2521	50.4854	10.4849	34.6628	4.36698	8.47513e-06
2659	21.0048	37.9159	19.6186	21.4607	8.45802e-06
238	72.1251	0	6.85948	21.0154	8.40092e-06
2565	16.4146	0	55.9195	27.6659	8.39889e-06
1613	19.7398	18.9348	53.6405	7.68489	8.39272e-06
1710	5.10577	0	27.395	67.4992	8.3916e-06
488	46.4586	20.2099	15.7622	17.5694	8.35068e-06
685	12.7854	3.66383	63.0029	20.5479	8.32265e-06
2660	9.29052	11.542	35.4762	43.6913	8.291e-06
1698	3.68272	14.7237	67.5648	14.0288	8.27857e-06
1606	8.6177	0	40.022	51.3603	8.27531e-06
1525	0	22.4527	57.995	19.5523	8.20138e-06
530	61.5423	0	28.7039	9.75373	8.18662e-06
2401	0	0	77.9335	22.0665	8.16023e-06
1054	18.9588	14.1715	13.1883	53.6815	8.13058e-06
2186	7.75224	12.7108	61.0469	18.4901	8.12842e-06
853	0	0	10.3674	89.6326	8.11309e-06
2218	5.83447	20.1389	50.0414	23.9852	8.10605e-06
1946	4.75765	0	50.1517	45.0906	8.05577e-06
1950	40.0968	0	59.9032	0	8.02873e-06
192	30.2633	36.1009	4.32622	29.3095	8.00334e-06
914	24.4244	18.4103	54.7283	2.437	7.97229e-06
809	51.0779	0	24.8432	24.0789	7.95747e-06
2561	21.0215	26.0645	10.0041	42.9099	7.95452e-06
1722	24.8657	0	44.6822	30.4521	7.95012e-06
173	23.5695	0	22.3996	54.0309	7.92959e-06
554	40.2947	0	32.8008	26.9044	7.90924e-06
2252	43.1447	5.74433	13.9398	37.1712	7.90787e-06
1651	29.7555	21.6116	20.4104	28.2225	7.89872e-06
1490	3.05212	0	14.6001	82.3477	7.89412e-06
1096	0	0	82.9627	17.0373	7.8756e-06
392	10.9905	0	54.0621	34.9473	7.86218e-06
2540	61.8916	0	29.2507	8.85772	7.85546e-06
2426	7.33007	45.3372	16.4751	30.8576	7.83932e-06
2567	4.68921	0	88.9732	6.33763	7.83683e-06
524	4.66548	10.9066	37.0813	47.3467	7.83051e-06
180	3.93517	12.5528	56.9021	26.61	7.81906e-06
552	5.47649	0	46.5043	48.0192	7.76099e-06
1730	33.5881	0	4.68202	61.7298	7.75396e-06
2585	26.7762	16.3064	7.75963	49.1578	7.73642e-06
2529	54.4832	0	28.3557	17.1611	7.72908e-06
1063	48.0103	6.72755	26.5933	18.6688	7.69923e-06
161	75.9745	0	3.7705	20.255	7.62363e-06
1260	13.4035	43.3109	36.5555	6.7301	7.61288e-06
1775	41.7677	35.0276	18.2888	4.9159	7.49917e-06
1723	16.3663	4.06357	3.41118	76.159	7.48866e-06
389	0	0	80.2091	19.7909	7.48374e-06
875	0	2.45182	40.8346	56.7135	7.45781e-06
235	77.0358	7.60558	7.77433	7.58425	7.45646e-06
1831	39.6428	21.5056	7.61826	31.2333	7.44809e-06
264	58.6888	11.6346	29.6766	0	7.28095e-06
2564	63.8554	0	5.77937	30.3652	7.26654e-06
1547	9.39881	17.0551	23.9552	49.5908	7.2314e-06
1424	8.28201	11.6514	26.0237	54.0428	7.20439e-06
290	15.5954	20.0698	49.0379	15.297	7.18047e-06
2634	57.5644	0	0	42.4356	7.16557e-06
2793	46.1431	0	37.9084	15.9485	7.10603e-06
2562	46.3295	11.8404	41.8301	0	7.07584e-06
635	44.8593	0	24.5083	30.6324	6.9839e-06
2552	5.30777	27.9331	8.13695	58.6222	6.97032e-06
2530	9.88165	54.8412	30.1219	5.15528	6.94707e-06
357	4.47492	0	36.3277	59.1974	6.92813e-06
1206	42.6388	7.08091	33.9251	16.3552	6.91066e-06
1313	59.8451	0	7.70038	32.4546	6.88022e-06
1717	0	0	100	0	6.87717e-06
2160	52.2822	23.2457	15.7995	8.67261	6.86355e-06
2230	28.1855	20.4503	6.44302	44.9212	6.83195e-06
394	14.2711	0	35.9663	49.7626	6.78593e-06
160	39.6393	7.34338	31.12	21.8974	6.76139e-06
2148	47.0902	0	42.4683	10.4415	6.75484e-06
1787	18.8076	0	64.9878	16.2045	6.63452e-06
387	26.8487	0	2.46572	70.6856	6.62673e-06
846	66.3767	0	0	33.6233	6.61169e-06
2641	12.9462	9.42227	30.1339	47.4975	6.59886e-06
1942	48.0614	6.20621	32.4847	13.2477	6.53415e-06
687	37.0727	0	45.7729	17.1543	6.51782e-06
2147	67.9349	13.3872	8.46438	10.2135	6.51052e-06
386	26.3176	0	19.1443	54.5381	6.50823e-06
2523	3.84614	0	23.3798	72.7741	6.44291e-06
2289	11.7277	0	72.3482	15.9241	6.44003e-06
2509	13.8626	8.51335	58.4906	19.1335	6.34348e-06
247	24.0216	7.41194	48.5135	20.0529	6.25745e-06
2815	67.9932	4.74826	0	27.2586	6.25423e-06
214	3.32801	5.53057	50.8683	40.2731	6.21973e-06
1286	13.2799	12.798	13.8091	60.113	6.21565e-06
2763	58.9824	0	17.5424	23.4752	6.21307e-06
2556	71.0179	4.0784	24.9037	0	6.20422e-06
308	0	0	64.4894	35.5106	6.18426e-06
2438	0	0	88.3163	11.6837	6.17803e-06
840	47.0364	0	7.82035	45.1432	6.08699e-06
2579	0	0	62.0493	37.9507	6.05916e-06
2563	17.2478	5.17624	43.1035	34.4725	6.05798e-06
1716	23.5233	39.5035	25.0321	11.9411	6.04907e-06
1796	6.5899	0	44.3714	49.0387	6.02742e-06
2570	0	5.94812	94.0519	0	6.00832e-06
1007	0	8.51534	8.78153	82.7031	5.96645e-06
417	0	19.0133	24.3557	56.631	5.92582e-06
1287	6.9003	0	65.7874	27.3123	5.90866e-06
2669	17.1029	0	38.4722	44.4248	5.90839e-06
551	33.811	4.60372	41.9364	19.6489	5.89761e-06
1515	46.2169	5.5159	11.9255	36.3418	5.84503e-06
2295	0	0	20.4633	79.5367	5.80873e-06
2747	0	8.4897	46.2171	45.2932	5.7834e-06
198	49.6522	10.6426	33.3044	6.40079	5.77536e-06
919	38.7161	10.8944	40.616	9.77349	5.76348e-06
2517	7.99806	34.568	18.9937	38.4403	5.73738e-06
2599	47.9598	21.8911	14.5915	15.5576	5.71489e-06
2153	0	0	86.6975	13.3025	5.71064e-06
2818	0	0	0	100	5.66881e-06
1945	11.3445	0	31.5269	57.1286	5.60301e-06
470	22.623	0	39.8638	37.5132	5.55405e-06
2553	16.2329	15.159	19.9603	48.6478	5.54493e-06
1237	14.3028	68.3606	0	17.3367	5.53478e-06
2475	39.3606	6.30747	44.9827	9.3492	5.48201e-06
1140	32.9323	7.89597	28.8069	30.3648	5.44093e-06
2863	8.36028	26.3325	51.3049	14.0023	5.35726e-06
2867	38.5069	0	32.9794	28.5137	5.35131e-06
1400	27.4741	0	21.2893	51.2366	5.28016e-06
282	36.4846	0	23.2492	40.2661	5.2193e-06
2359	37.9831	36.1006	7.72799	18.1883	5.14798e-06
2694	0	45.9489	26.2919	27.7592	5.10462e-06
1697	60.2791	25.5892	0	14.1318	5.09912e-06
1836	18.4646	9.80019	40.0494	31.6859	5.04456e-06
2056	0	27.593	33.4242	38.9828	4.97658e-06
2864	8.31139	0	48.4764	43.2122	4.93187e-06
376	10.4475	9.20981	30.1676	50.1751	4.88067e-06
405	52.6131	0	40.2389	7.14794	4.7787e-06
1453	6.8496	0	81.8808	11.2696	4.77268e-06
781	9.44205	0	22.9943	67.5636	4.77204e-06
2610	0	0	79.3326	20.6674	4.76743e-06
2543	8.65196	7.01666	44.2295	40.1018	4.76097e-06
1746	9.08845	0	66.1558	24.7557	4.72098e-06
1158	0	38.6122	41.7853	19.6025	4.71466e-06
1670	6.40365	0	0	93.5963	4.67989e-06
2326	0	0	100	0	4.66593e-06
293	21.6347	14.8169	15.5273	48.0211	4.63738e-06
377	58.4435	14.9528	16.972	9.63169	4.61183e-06
2491	53.8148	0	15.9246	30.2606	4.55082e-06
1769	62.2381	16.4978	8.05521	13.2089	4.53957e-06
125	20.1485	18.1696	40.4383	21.2437	4.48638e-06
2161	7.79022	0	28.1881	64.0216	4.46627e-06
515	46.4764	16.2549	31.5538	5.71496	4.41646e-06
1017	72.854	0	8.53513	18.6109	4.38639e-06
197	36.8202	0	54.4796	8.70017	4.36893e-06
294	8.06281	42.2856	18.2848	31.3667	4.3653e-06
212	0	0	100	0	4.35183e-06
2489	7.69312	0	30.6202	61.6867	4.33581e-06
2402	31.1243	0	59.7756	9.1001	4.33507e-06
1736	44.5476	0	9.28583	46.1666	4.2914e-06
2655	0	0	62.7885	37.2115	4.28645e-06
2232	22.2704	7.64398	47.1281	22.9576	4.28167e-06
1597	19.2084	0	40.2179	40.5737	4.26755e-06
136	8.75649	30.4801	30.47	30.2934	4.23084e-06
1642	9.09704	0	45.0689	45.8341	4.21258e-06
98	6.76057	22.3124	27.7254	43.2016	4.14876e-06
2803	16.1328	0	34.5162	49.351	4.09282e-06
2456	30.5528	25.8389	20.6827	22.9257	4.04699e-06
2569	0	0	42.9354	57.0646	4.02582e-06
1795	20.0966	33.4748	16.1028	30.3259	3.91935e-06
2541	0	20.1409	61.2608	18.5984	3.82513e-06
1373	34.8788	0	43.9509	21.1703	3.76411e-06
1923	0	72.9229	18.0968	8.9803	3.69126e-06
2608	0	29.8754	13.5357	56.5889	3.68922e-06
804	24.7019	39.6467	15.2657	20.3857	3.67387e-06
2510	34.8056	35.655	0	29.5394	3.66927e-06
1604	34.2392	65.7608	0	0	3.53159e-06
610	0	42.1224	49.5322	8.34536	3.53115e-06
1742	11.1821	12.5093	45.8923	30.4163	3.52582e-06
2207	0	0	72.8702	27.1298	3.49974e-06
355	0	0	44.3571	55.6429	3.39532e-06
261	34.0316	0	41.8849	24.0835	3.33615e-06
2095	51.4148	0	48.5852	0	3.33185e-06
1448	20.5251	0	53.2527	26.2222	3.31684e-06
969	25.7563	40.3348	0	33.9089	3.30237e-06
2085	17.1568	0	12.3124	70.5308	3.2766e-06
2476	9.49011	20.7393	38.1025	31.6681	3.20079e-06
2386	0	16.857	47.7167	35.4263	3.16356e-06
2532	37.3966	0	0	62.6033	3.15024e-06
2518	30.6791	37.5661	31.7548	0	3.11941e-06
2002	0	0	29.1086	70.8914	3.01068e-06
1605	0	0	48.7654	51.2346	2.8826e-06
1551	0	0	0	100	2.8303e-06
2519	35.1922	12.4236	52.3842	0	2.78323e-06
187	45.8795	17.0835	9.60462	27.4324	2.48315e-06
1295	0	0	43.1353	56.8647	2.45455e-06
2184	19.3833	0	44.1887	36.428	2.43941e-06
1489	0	40.2427	0	59.7573	2.40371e-06
1753	56.4771	0	43.5229	0	2.30355e-06
1684	0	19.416	49.3978	31.1861	2.2976e-06
2850	0	0	100	0	2.21734e-06
1036	43.129	0	16.3239	40.5471	2.11559e-06
2468	0	16.527	69.2901	14.1829	2.02665e-06
1159	0	0	62.95	37.05	2.00964e-06
1948	0	0	37.5454	62.4546	1.99713e-06
2183	0	77.0369	14.2399	8.72327	1.98702e-06
2859	0	20.857	9.46122	69.6818	1.93171e-06
1714	41.0933	0	18.112	40.7947	1.90639e-06
2526	0	0	100	0	1.86649e-06
2242	77.2065	0	22.7935	0	1.86491e-06
2088	0	0	100	0	1.77374e-06
2409	17.5112	0	24.8904	57.5984	1.47517e-06
2379	0	0	100	0	1.47195e-06
2985	72.2573	0	27.7427	0	1.17353e-06
628	0	0	65.6306	34.3694	1.09014e-06
638	0	0	0	100	8.18016e-07
2026	#DIV/0!	#DIV/0!	#DIV/0!	#DIV/0!	0
2902	#DIV/0!	#DIV/0!	#DIV/0!	#DIV/0!	0
2927	#DIV/0!	#DIV/0!	#DIV/0!	#DIV/0!	0
2070	#DIV/0!	#DIV/0!	#DIV/0!	#DIV/0!	0
2900	#DIV/0!	#DIV/0!	#DIV/0!	#DIV/0!	0
2069	#DIV/0!	#DIV/0!	#DIV/0!	#DIV/0!	0
2901	#DIV/0!	#DIV/0!	#DIV/0!	#DIV/0!	0
1911	#DIV/0!	#DIV/0!	#DIV/0!	#DIV/0!	0
2029	#DIV/0!	#DIV/0!	#DIV/0!	#DIV/0!	0
2903	#DIV/0!	#DIV/0!	#DIV/0!	#DIV/0!	0
2068	#DIV/0!	#DIV/0!	#DIV/0!	#DIV/0!	0
1910	#DIV/0!	#DIV/0!	#DIV/0!	#DIV/0!	0
1909	#DIV/0!	#DIV/0!	#DIV/0!	#DIV/0!	0
2031	#DIV/0!	#DIV/0!	#DIV/0!	#DIV/0!	0
2904	#DIV/0!	#DIV/0!	#DIV/0!	#DIV/0!	0
2066	#DIV/0!	#DIV/0!	#DIV/0!	#DIV/0!	0
2071	#DIV/0!	#DIV/0!	#DIV/0!	#DIV/0!	0
2899	#DIV/0!	#DIV/0!	#DIV/0!	#DIV/0!	0
2928	#DIV/0!	#DIV/0!	#DIV/0!	#DIV/0!	0
2027	#DIV/0!	#DIV/0!	#DIV/0!	#DIV/0!	0
2078	#DIV/0!	#DIV/0!	#DIV/0!	#DIV/0!	0
1913	#DIV/0!	#DIV/0!	#DIV/0!	#DIV/0!	0
2077	#DIV/0!	#DIV/0!	#DIV/0!	#DIV/0!	0
2076	#DIV/0!	#DIV/0!	#DIV/0!	#DIV/0!	0
2075	#DIV/0!	#DIV/0!	#DIV/0!	#DIV/0!	0
1912	#DIV/0!	#DIV/0!	#DIV/0!	#DIV/0!	0
2929	#DIV/0!	#DIV/0!	#DIV/0!	#DIV/0!	0
2080	#DIV/0!	#DIV/0!	#DIV/0!	#DIV/0!	0
2074	#DIV/0!	#DIV/0!	#DIV/0!	#DIV/0!	0
2079	#DIV/0!	#DIV/0!	#DIV/0!	#DIV/0!	0
2897	#DIV/0!	#DIV/0!	#DIV/0!	#DIV/0!	0
2073	#DIV/0!	#DIV/0!	#DIV/0!	#DIV/0!	0
2028	#DIV/0!	#DIV/0!	#DIV/0!	#DIV/0!	0
2072	#DIV/0!	#DIV/0!	#DIV/0!	#DIV/0!	0
2905	#DIV/0!	#DIV/0!	#DIV/0!	#DIV/0!	0
2047	#DIV/0!	#DIV/0!	#DIV/0!	#DIV/0!	0
2048	#DIV/0!	#DIV/0!	#DIV/0!	#DIV/0!	0
2906	#DIV/0!	#DIV/0!	#DIV/0!	#DIV/0!	0
2041	#DIV/0!	#DIV/0!	#DIV/0!	#DIV/0!	0
2042	#DIV/0!	#DIV/0!	#DIV/0!	#DIV/0!	0
2930	#DIV/0!	#DIV/0!	#DIV/0!	#DIV/0!	0
2043	#DIV/0!	#DIV/0!	#DIV/0!	#DIV/0!	0
2919	#DIV/0!	#DIV/0!	#DIV/0!	#DIV/0!	0
2920	#DIV/0!	#DIV/0!	#DIV/0!	#DIV/0!	0
2044	#DIV/0!	#DIV/0!	#DIV/0!	#DIV/0!	0
2054	#DIV/0!	#DIV/0!	#DIV/0!	#DIV/0!	0
2921	#DIV/0!	#DIV/0!	#DIV/0!	#DIV/0!	0
2053	#DIV/0!	#DIV/0!	#DIV/0!	#DIV/0!	0
2052	#DIV/0!	#DIV/0!	#DIV/0!	#DIV/0!	0
2923	#DIV/0!	#DIV/0!	#DIV/0!	#DIV/0!	0
2045	#DIV/0!	#DIV/0!	#DIV/0!	#DIV/0!	0
2922	#DIV/0!	#DIV/0!	#DIV/0!	#DIV/0!	0
2046	#DIV/0!	#DIV/0!	#DIV/0!	#DIV/0!	0
2051	#DIV/0!	#DIV/0!	#DIV/0!	#DIV/0!	0
2050	#DIV/0!	#DIV/0!	#DIV/0!	#DIV/0!	0
1907	#DIV/0!	#DIV/0!	#DIV/0!	#DIV/0!	0
2049	#DIV/0!	#DIV/0!	#DIV/0!	#DIV/0!	0
2058	#DIV/0!	#DIV/0!	#DIV/0!	#DIV/0!	0
2918	#DIV/0!	#DIV/0!	#DIV/0!	#DIV/0!	0
2059	#DIV/0!	#DIV/0!	#DIV/0!	#DIV/0!	0
1908	#DIV/0!	#DIV/0!	#DIV/0!	#DIV/0!	0
2908	#DIV/0!	#DIV/0!	#DIV/0!	#DIV/0!	0
2062	#DIV/0!	#DIV/0!	#DIV/0!	#DIV/0!	0
2926	#DIV/0!	#DIV/0!	#DIV/0!	#DIV/0!	0
2033	#DIV/0!	#DIV/0!	#DIV/0!	#DIV/0!	0
2034	#DIV/0!	#DIV/0!	#DIV/0!	#DIV/0!	0
2925	#DIV/0!	#DIV/0!	#DIV/0!	#DIV/0!	0
2035	#DIV/0!	#DIV/0!	#DIV/0!	#DIV/0!	0
2036	#DIV/0!	#DIV/0!	#DIV/0!	#DIV/0!	0
2909	#DIV/0!	#DIV/0!	#DIV/0!	#DIV/0!	0
2917	#DIV/0!	#DIV/0!	#DIV/0!	#DIV/0!	0
2911	#DIV/0!	#DIV/0!	#DIV/0!	#DIV/0!	0
2913	#DIV/0!	#DIV/0!	#DIV/0!	#DIV/0!	0
2037	#DIV/0!	#DIV/0!	#DIV/0!	#DIV/0!	0
2924	#DIV/0!	#DIV/0!	#DIV/0!	#DIV/0!	0
2914	#DIV/0!	#DIV/0!	#DIV/0!	#DIV/0!	0
2915	#DIV/0!	#DIV/0!	#DIV/0!	#DIV/0!	0
2916	#DIV/0!	#DIV/0!	#DIV/0!	#DIV/0!	0
2040	#DIV/0!	#DIV/0!	#DIV/0!	#DIV/0!	0
2057	#DIV/0!	#DIV/0!	#DIV/0!	#DIV/0!	0
1935	#DIV/0!	#DIV/0!	#DIV/0!	#DIV/0!	0
1914	#DIV/0!	#DIV/0!	#DIV/0!	#DIV/0!	0
1970	#DIV/0!	#DIV/0!	#DIV/0!	#DIV/0!	0
2967	#DIV/0!	#DIV/0!	#DIV/0!	#DIV/0!	0
2968	#DIV/0!	#DIV/0!	#DIV/0!	#DIV/0!	0
2969	#DIV/0!	#DIV/0!	#DIV/0!	#DIV/0!	0
2970	#DIV/0!	#DIV/0!	#DIV/0!	#DIV/0!	0
1972	#DIV/0!	#DIV/0!	#DIV/0!	#DIV/0!	0
1971	#DIV/0!	#DIV/0!	#DIV/0!	#DIV/0!	0
1969	#DIV/0!	#DIV/0!	#DIV/0!	#DIV/0!	0
1962	#DIV/0!	#DIV/0!	#DIV/0!	#DIV/0!	0
2971	#DIV/0!	#DIV/0!	#DIV/0!	#DIV/0!	0
2972	#DIV/0!	#DIV/0!	#DIV/0!	#DIV/0!	0
2973	#DIV/0!	#DIV/0!	#DIV/0!	#DIV/0!	0
1965	#DIV/0!	#DIV/0!	#DIV/0!	#DIV/0!	0
2974	#DIV/0!	#DIV/0!	#DIV/0!	#DIV/0!	0
1964	#DIV/0!	#DIV/0!	#DIV/0!	#DIV/0!	0
2966	#DIV/0!	#DIV/0!	#DIV/0!	#DIV/0!	0
2965	#DIV/0!	#DIV/0!	#DIV/0!	#DIV/0!	0
2964	#DIV/0!	#DIV/0!	#DIV/0!	#DIV/0!	0
2963	#DIV/0!	#DIV/0!	#DIV/0!	#DIV/0!	0
2962	#DIV/0!	#DIV/0!	#DIV/0!	#DIV/0!	0
2961	#DIV/0!	#DIV/0!	#DIV/0!	#DIV/0!	0
2960	#DIV/0!	#DIV/0!	#DIV/0!	#DIV/0!	0
1976	#DIV/0!	#DIV/0!	#DIV/0!	#DIV/0!	0
2959	#DIV/0!	#DIV/0!	#DIV/0!	#DIV/0!	0
2958	#DIV/0!	#DIV/0!	#DIV/0!	#DIV/0!	0
1977	#DIV/0!	#DIV/0!	#DIV/0!	#DIV/0!	0
1978	#DIV/0!	#DIV/0!	#DIV/0!	#DIV/0!	0
1979	#DIV/0!	#DIV/0!	#DIV/0!	#DIV/0!	0
1980	#DIV/0!	#DIV/0!	#DIV/0!	#DIV/0!	0
2957	#DIV/0!	#DIV/0!	#DIV/0!	#DIV/0!	0
1981	#DIV/0!	#DIV/0!	#DIV/0!	#DIV/0!	0
1982	#DIV/0!	#DIV/0!	#DIV/0!	#DIV/0!	0
1963	#DIV/0!	#DIV/0!	#DIV/0!	#DIV/0!	0
1961	#DIV/0!	#DIV/0!	#DIV/0!	#DIV/0!	0
2931	#DIV/0!	#DIV/0!	#DIV/0!	#DIV/0!	0
2988	#DIV/0!	#DIV/0!	#DIV/0!	#DIV/0!	0
2991	#DIV/0!	#DIV/0!	#DIV/0!	#DIV/0!	0
1929	#DIV/0!	#DIV/0!	#DIV/0!	#DIV/0!	0
2990	#DIV/0!	#DIV/0!	#DIV/0!	#DIV/0!	0
2989	#DIV/0!	#DIV/0!	#DIV/0!	#DIV/0!	0
1941	#DIV/0!	#DIV/0!	#DIV/0!	#DIV/0!	0
1931	#DIV/0!	#DIV/0!	#DIV/0!	#DIV/0!	0
1940	#DIV/0!	#DIV/0!	#DIV/0!	#DIV/0!	0
1960	#DIV/0!	#DIV/0!	#DIV/0!	#DIV/0!	0
1939	#DIV/0!	#DIV/0!	#DIV/0!	#DIV/0!	0
2984	#DIV/0!	#DIV/0!	#DIV/0!	#DIV/0!	0
1938	#DIV/0!	#DIV/0!	#DIV/0!	#DIV/0!	0
2986	#DIV/0!	#DIV/0!	#DIV/0!	#DIV/0!	0
1934	#DIV/0!	#DIV/0!	#DIV/0!	#DIV/0!	0
1937	#DIV/0!	#DIV/0!	#DIV/0!	#DIV/0!	0
2992	#DIV/0!	#DIV/0!	#DIV/0!	#DIV/0!	0
1943	#DIV/0!	#DIV/0!	#DIV/0!	#DIV/0!	0
1926	#DIV/0!	#DIV/0!	#DIV/0!	#DIV/0!	0
1925	#DIV/0!	#DIV/0!	#DIV/0!	#DIV/0!	0
1944	#DIV/0!	#DIV/0!	#DIV/0!	#DIV/0!	0
1924	#DIV/0!	#DIV/0!	#DIV/0!	#DIV/0!	0
2983	#DIV/0!	#DIV/0!	#DIV/0!	#DIV/0!	0
2982	#DIV/0!	#DIV/0!	#DIV/0!	#DIV/0!	0
2981	#DIV/0!	#DIV/0!	#DIV/0!	#DIV/0!	0
2980	#DIV/0!	#DIV/0!	#DIV/0!	#DIV/0!	0
2978	#DIV/0!	#DIV/0!	#DIV/0!	#DIV/0!	0
1954	#DIV/0!	#DIV/0!	#DIV/0!	#DIV/0!	0
1955	#DIV/0!	#DIV/0!	#DIV/0!	#DIV/0!	0
2977	#DIV/0!	#DIV/0!	#DIV/0!	#DIV/0!	0
1956	#DIV/0!	#DIV/0!	#DIV/0!	#DIV/0!	0
1957	#DIV/0!	#DIV/0!	#DIV/0!	#DIV/0!	0
2976	#DIV/0!	#DIV/0!	#DIV/0!	#DIV/0!	0
1983	#DIV/0!	#DIV/0!	#DIV/0!	#DIV/0!	0
1984	#DIV/0!	#DIV/0!	#DIV/0!	#DIV/0!	0
1922	#DIV/0!	#DIV/0!	#DIV/0!	#DIV/0!	0
2941	#DIV/0!	#DIV/0!	#DIV/0!	#DIV/0!	0
2937	#DIV/0!	#DIV/0!	#DIV/0!	#DIV/0!	0
2938	#DIV/0!	#DIV/0!	#DIV/0!	#DIV/0!	0
1918	#DIV/0!	#DIV/0!	#DIV/0!	#DIV/0!	0
2939	#DIV/0!	#DIV/0!	#DIV/0!	#DIV/0!	0
2940	#DIV/0!	#DIV/0!	#DIV/0!	#DIV/0!	0
2012	#DIV/0!	#DIV/0!	#DIV/0!	#DIV/0!	0
2011	#DIV/0!	#DIV/0!	#DIV/0!	#DIV/0!	0
1985	#DIV/0!	#DIV/0!	#DIV/0!	#DIV/0!	0
1936	#DIV/0!	#DIV/0!	#DIV/0!	#DIV/0!	0
2942	#DIV/0!	#DIV/0!	#DIV/0!	#DIV/0!	0
2943	#DIV/0!	#DIV/0!	#DIV/0!	#DIV/0!	0
2008	#DIV/0!	#DIV/0!	#DIV/0!	#DIV/0!	0
2944	#DIV/0!	#DIV/0!	#DIV/0!	#DIV/0!	0
2945	#DIV/0!	#DIV/0!	#DIV/0!	#DIV/0!	0
2936	#DIV/0!	#DIV/0!	#DIV/0!	#DIV/0!	0
2014	#DIV/0!	#DIV/0!	#DIV/0!	#DIV/0!	0
1917	#DIV/0!	#DIV/0!	#DIV/0!	#DIV/0!	0
1916	#DIV/0!	#DIV/0!	#DIV/0!	#DIV/0!	0
2935	#DIV/0!	#DIV/0!	#DIV/0!	#DIV/0!	0
2934	#DIV/0!	#DIV/0!	#DIV/0!	#DIV/0!	0
2933	#DIV/0!	#DIV/0!	#DIV/0!	#DIV/0!	0
2932	#DIV/0!	#DIV/0!	#DIV/0!	#DIV/0!	0
2018	#DIV/0!	#DIV/0!	#DIV/0!	#DIV/0!	0
2019	#DIV/0!	#DIV/0!	#DIV/0!	#DIV/0!	0
2020	#DIV/0!	#DIV/0!	#DIV/0!	#DIV/0!	0
2021	#DIV/0!	#DIV/0!	#DIV/0!	#DIV/0!	0
2022	#DIV/0!	#DIV/0!	#DIV/0!	#DIV/0!	0
2023	#DIV/0!	#DIV/0!	#DIV/0!	#DIV/0!	0
2024	#DIV/0!	#DIV/0!	#DIV/0!	#DIV/0!	0
1915	#DIV/0!	#DIV/0!	#DIV/0!	#DIV/0!	0
2025	#DIV/0!	#DIV/0!	#DIV/0!	#DIV/0!	0
2006	#DIV/0!	#DIV/0!	#DIV/0!	#DIV/0!	0
2005	#DIV/0!	#DIV/0!	#DIV/0!	#DIV/0!	0
2996	#DIV/0!	#DIV/0!	#DIV/0!	#DIV/0!	0
1997	#DIV/0!	#DIV/0!	#DIV/0!	#DIV/0!	0
1986	#DIV/0!	#DIV/0!	#DIV/0!	#DIV/0!	0
1987	#DIV/0!	#DIV/0!	#DIV/0!	#DIV/0!	0
1988	#DIV/0!	#DIV/0!	#DIV/0!	#DIV/0!	0
2956	#DIV/0!	#DIV/0!	#DIV/0!	#DIV/0!	0
2955	#DIV/0!	#DIV/0!	#DIV/0!	#DIV/0!	0
2993	#DIV/0!	#DIV/0!	#DIV/0!	#DIV/0!	0
1989	#DIV/0!	#DIV/0!	#DIV/0!	#DIV/0!	0
1990	#DIV/0!	#DIV/0!	#DIV/0!	#DIV/0!	0
1991	#DIV/0!	#DIV/0!	#DIV/0!	#DIV/0!	0
1992	#DIV/0!	#DIV/0!	#DIV/0!	#DIV/0!	0
1993	#DIV/0!	#DIV/0!	#DIV/0!	#DIV/0!	0
1994	#DIV/0!	#DIV/0!	#DIV/0!	#DIV/0!	0
1995	#DIV/0!	#DIV/0!	#DIV/0!	#DIV/0!	0
1996	#DIV/0!	#DIV/0!	#DIV/0!	#DIV/0!	0
1998	#DIV/0!	#DIV/0!	#DIV/0!	#DIV/0!	0
2946	#DIV/0!	#DIV/0!	#DIV/0!	#DIV/0!	0
1999	#DIV/0!	#DIV/0!	#DIV/0!	#DIV/0!	0
2954	#DIV/0!	#DIV/0!	#DIV/0!	#DIV/0!	0
2953	#DIV/0!	#DIV/0!	#DIV/0!	#DIV/0!	0
2000	#DIV/0!	#DIV/0!	#DIV/0!	#DIV/0!	0
2952	#DIV/0!	#DIV/0!	#DIV/0!	#DIV/0!	0
2951	#DIV/0!	#DIV/0!	#DIV/0!	#DIV/0!	0
2001	#DIV/0!	#DIV/0!	#DIV/0!	#DIV/0!	0
2994	#DIV/0!	#DIV/0!	#DIV/0!	#DIV/0!	0
2950	#DIV/0!	#DIV/0!	#DIV/0!	#DIV/0!	0
2949	#DIV/0!	#DIV/0!	#DIV/0!	#DIV/0!	0
2003	#DIV/0!	#DIV/0!	#DIV/0!	#DIV/0!	0
2948	#DIV/0!	#DIV/0!	#DIV/0!	#DIV/0!	0
2947	#DIV/0!	#DIV/0!	#DIV/0!	#DIV/0!	0
2004	#DIV/0!	#DIV/0!	#DIV/0!	#DIV/0!	0
2010	#DIV/0!	#DIV/0!	#DIV/0!	#DIV/0!	0
2118	#DIV/0!	#DIV/0!	#DIV/0!	#DIV/0!	0
2895	#DIV/0!	#DIV/0!	#DIV/0!	#DIV/0!	0
2678	#DIV/0!	#DIV/0!	#DIV/0!	#DIV/0!	0
2265	#DIV/0!	#DIV/0!	#DIV/0!	#DIV/0!	0
2264	#DIV/0!	#DIV/0!	#DIV/0!	#DIV/0!	0
2263	#DIV/0!	#DIV/0!	#DIV/0!	#DIV/0!	0
2261	#DIV/0!	#DIV/0!	#DIV/0!	#DIV/0!	0
2677	#DIV/0!	#DIV/0!	#DIV/0!	#DIV/0!	0
2259	#DIV/0!	#DIV/0!	#DIV/0!	#DIV/0!	0
2679	#DIV/0!	#DIV/0!	#DIV/0!	#DIV/0!	0
2751	#DIV/0!	#DIV/0!	#DIV/0!	#DIV/0!	0
2257	#DIV/0!	#DIV/0!	#DIV/0!	#DIV/0!	0
2255	#DIV/0!	#DIV/0!	#DIV/0!	#DIV/0!	0
2680	#DIV/0!	#DIV/0!	#DIV/0!	#DIV/0!	0
2253	#DIV/0!	#DIV/0!	#DIV/0!	#DIV/0!	0
2681	#DIV/0!	#DIV/0!	#DIV/0!	#DIV/0!	0
2683	#DIV/0!	#DIV/0!	#DIV/0!	#DIV/0!	0
2676	#DIV/0!	#DIV/0!	#DIV/0!	#DIV/0!	0
2267	#DIV/0!	#DIV/0!	#DIV/0!	#DIV/0!	0
2675	#DIV/0!	#DIV/0!	#DIV/0!	#DIV/0!	0
2674	#DIV/0!	#DIV/0!	#DIV/0!	#DIV/0!	0
2269	#DIV/0!	#DIV/0!	#DIV/0!	#DIV/0!	0
2665	#DIV/0!	#DIV/0!	#DIV/0!	#DIV/0!	0
2664	#DIV/0!	#DIV/0!	#DIV/0!	#DIV/0!	0
2271	#DIV/0!	#DIV/0!	#DIV/0!	#DIV/0!	0
2273	#DIV/0!	#DIV/0!	#DIV/0!	#DIV/0!	0
2274	#DIV/0!	#DIV/0!	#DIV/0!	#DIV/0!	0
2275	#DIV/0!	#DIV/0!	#DIV/0!	#DIV/0!	0
2658	#DIV/0!	#DIV/0!	#DIV/0!	#DIV/0!	0
2657	#DIV/0!	#DIV/0!	#DIV/0!	#DIV/0!	0
2656	#DIV/0!	#DIV/0!	#DIV/0!	#DIV/0!	0
2654	#DIV/0!	#DIV/0!	#DIV/0!	#DIV/0!	0
2652	#DIV/0!	#DIV/0!	#DIV/0!	#DIV/0!	0
2650	#DIV/0!	#DIV/0!	#DIV/0!	#DIV/0!	0
2684	#DIV/0!	#DIV/0!	#DIV/0!	#DIV/0!	0
2685	#DIV/0!	#DIV/0!	#DIV/0!	#DIV/0!	0
2247	#DIV/0!	#DIV/0!	#DIV/0!	#DIV/0!	0
2226	#DIV/0!	#DIV/0!	#DIV/0!	#DIV/0!	0
2211	#DIV/0!	#DIV/0!	#DIV/0!	#DIV/0!	0
2742	#DIV/0!	#DIV/0!	#DIV/0!	#DIV/0!	0
2741	#DIV/0!	#DIV/0!	#DIV/0!	#DIV/0!	0
2736	#DIV/0!	#DIV/0!	#DIV/0!	#DIV/0!	0
2731	#DIV/0!	#DIV/0!	#DIV/0!	#DIV/0!	0
2214	#DIV/0!	#DIV/0!	#DIV/0!	#DIV/0!	0
2215	#DIV/0!	#DIV/0!	#DIV/0!	#DIV/0!	0
2216	#DIV/0!	#DIV/0!	#DIV/0!	#DIV/0!	0
2729	#DIV/0!	#DIV/0!	#DIV/0!	#DIV/0!	0
2219	#DIV/0!	#DIV/0!	#DIV/0!	#DIV/0!	0
2222	#DIV/0!	#DIV/0!	#DIV/0!	#DIV/0!	0
2223	#DIV/0!	#DIV/0!	#DIV/0!	#DIV/0!	0
2224	#DIV/0!	#DIV/0!	#DIV/0!	#DIV/0!	0
2718	#DIV/0!	#DIV/0!	#DIV/0!	#DIV/0!	0
2706	#DIV/0!	#DIV/0!	#DIV/0!	#DIV/0!	0
2686	#DIV/0!	#DIV/0!	#DIV/0!	#DIV/0!	0
2702	#DIV/0!	#DIV/0!	#DIV/0!	#DIV/0!	0
2229	#DIV/0!	#DIV/0!	#DIV/0!	#DIV/0!	0
2231	#DIV/0!	#DIV/0!	#DIV/0!	#DIV/0!	0
2701	#DIV/0!	#DIV/0!	#DIV/0!	#DIV/0!	0
2700	#DIV/0!	#DIV/0!	#DIV/0!	#DIV/0!	0
2699	#DIV/0!	#DIV/0!	#DIV/0!	#DIV/0!	0
2236	#DIV/0!	#DIV/0!	#DIV/0!	#DIV/0!	0
2696	#DIV/0!	#DIV/0!	#DIV/0!	#DIV/0!	0
2238	#DIV/0!	#DIV/0!	#DIV/0!	#DIV/0!	0
2695	#DIV/0!	#DIV/0!	#DIV/0!	#DIV/0!	0
2691	#DIV/0!	#DIV/0!	#DIV/0!	#DIV/0!	0
2243	#DIV/0!	#DIV/0!	#DIV/0!	#DIV/0!	0
2244	#DIV/0!	#DIV/0!	#DIV/0!	#DIV/0!	0
2245	#DIV/0!	#DIV/0!	#DIV/0!	#DIV/0!	0
2649	#DIV/0!	#DIV/0!	#DIV/0!	#DIV/0!	0
2648	#DIV/0!	#DIV/0!	#DIV/0!	#DIV/0!	0
2647	#DIV/0!	#DIV/0!	#DIV/0!	#DIV/0!	0
2355	#DIV/0!	#DIV/0!	#DIV/0!	#DIV/0!	0
2335	#DIV/0!	#DIV/0!	#DIV/0!	#DIV/0!	0
2336	#DIV/0!	#DIV/0!	#DIV/0!	#DIV/0!	0
2337	#DIV/0!	#DIV/0!	#DIV/0!	#DIV/0!	0
2338	#DIV/0!	#DIV/0!	#DIV/0!	#DIV/0!	0
2339	#DIV/0!	#DIV/0!	#DIV/0!	#DIV/0!	0
2340	#DIV/0!	#DIV/0!	#DIV/0!	#DIV/0!	0
2341	#DIV/0!	#DIV/0!	#DIV/0!	#DIV/0!	0
2342	#DIV/0!	#DIV/0!	#DIV/0!	#DIV/0!	0
2343	#DIV/0!	#DIV/0!	#DIV/0!	#DIV/0!	0
2344	#DIV/0!	#DIV/0!	#DIV/0!	#DIV/0!	0
2345	#DIV/0!	#DIV/0!	#DIV/0!	#DIV/0!	0
2346	#DIV/0!	#DIV/0!	#DIV/0!	#DIV/0!	0
2347	#DIV/0!	#DIV/0!	#DIV/0!	#DIV/0!	0
2349	#DIV/0!	#DIV/0!	#DIV/0!	#DIV/0!	0
2356	#DIV/0!	#DIV/0!	#DIV/0!	#DIV/0!	0
2333	#DIV/0!	#DIV/0!	#DIV/0!	#DIV/0!	0
2357	#DIV/0!	#DIV/0!	#DIV/0!	#DIV/0!	0
2360	#DIV/0!	#DIV/0!	#DIV/0!	#DIV/0!	0
2361	#DIV/0!	#DIV/0!	#DIV/0!	#DIV/0!	0
1905	#DIV/0!	#DIV/0!	#DIV/0!	#DIV/0!	0
2362	#DIV/0!	#DIV/0!	#DIV/0!	#DIV/0!	0
2365	#DIV/0!	#DIV/0!	#DIV/0!	#DIV/0!	0
2366	#DIV/0!	#DIV/0!	#DIV/0!	#DIV/0!	0
2368	#DIV/0!	#DIV/0!	#DIV/0!	#DIV/0!	0
2369	#DIV/0!	#DIV/0!	#DIV/0!	#DIV/0!	0
2370	#DIV/0!	#DIV/0!	#DIV/0!	#DIV/0!	0
2372	#DIV/0!	#DIV/0!	#DIV/0!	#DIV/0!	0
2373	#DIV/0!	#DIV/0!	#DIV/0!	#DIV/0!	0
2374	#DIV/0!	#DIV/0!	#DIV/0!	#DIV/0!	0
2375	#DIV/0!	#DIV/0!	#DIV/0!	#DIV/0!	0
2334	#DIV/0!	#DIV/0!	#DIV/0!	#DIV/0!	0
2332	#DIV/0!	#DIV/0!	#DIV/0!	#DIV/0!	0
2646	#DIV/0!	#DIV/0!	#DIV/0!	#DIV/0!	0
2299	#DIV/0!	#DIV/0!	#DIV/0!	#DIV/0!	0
2645	#DIV/0!	#DIV/0!	#DIV/0!	#DIV/0!	0
2282	#DIV/0!	#DIV/0!	#DIV/0!	#DIV/0!	0
2284	#DIV/0!	#DIV/0!	#DIV/0!	#DIV/0!	0
2285	#DIV/0!	#DIV/0!	#DIV/0!	#DIV/0!	0
2642	#DIV/0!	#DIV/0!	#DIV/0!	#DIV/0!	0
2292	#DIV/0!	#DIV/0!	#DIV/0!	#DIV/0!	0
2293	#DIV/0!	#DIV/0!	#DIV/0!	#DIV/0!	0
2640	#DIV/0!	#DIV/0!	#DIV/0!	#DIV/0!	0
2638	#DIV/0!	#DIV/0!	#DIV/0!	#DIV/0!	0
2637	#DIV/0!	#DIV/0!	#DIV/0!	#DIV/0!	0
2636	#DIV/0!	#DIV/0!	#DIV/0!	#DIV/0!	0
2296	#DIV/0!	#DIV/0!	#DIV/0!	#DIV/0!	0
2297	#DIV/0!	#DIV/0!	#DIV/0!	#DIV/0!	0
2298	#DIV/0!	#DIV/0!	#DIV/0!	#DIV/0!	0
2616	#DIV/0!	#DIV/0!	#DIV/0!	#DIV/0!	0
2331	#DIV/0!	#DIV/0!	#DIV/0!	#DIV/0!	0
2615	#DIV/0!	#DIV/0!	#DIV/0!	#DIV/0!	0
2614	#DIV/0!	#DIV/0!	#DIV/0!	#DIV/0!	0
2302	#DIV/0!	#DIV/0!	#DIV/0!	#DIV/0!	0
2303	#DIV/0!	#DIV/0!	#DIV/0!	#DIV/0!	0
2304	#DIV/0!	#DIV/0!	#DIV/0!	#DIV/0!	0
2611	#DIV/0!	#DIV/0!	#DIV/0!	#DIV/0!	0
2607	#DIV/0!	#DIV/0!	#DIV/0!	#DIV/0!	0
2602	#DIV/0!	#DIV/0!	#DIV/0!	#DIV/0!	0
2586	#DIV/0!	#DIV/0!	#DIV/0!	#DIV/0!	0
2320	#DIV/0!	#DIV/0!	#DIV/0!	#DIV/0!	0
2323	#DIV/0!	#DIV/0!	#DIV/0!	#DIV/0!	0
2328	#DIV/0!	#DIV/0!	#DIV/0!	#DIV/0!	0
2329	#DIV/0!	#DIV/0!	#DIV/0!	#DIV/0!	0
2330	#DIV/0!	#DIV/0!	#DIV/0!	#DIV/0!	0
2746	#DIV/0!	#DIV/0!	#DIV/0!	#DIV/0!	0
2206	#DIV/0!	#DIV/0!	#DIV/0!	#DIV/0!	0
2893	#DIV/0!	#DIV/0!	#DIV/0!	#DIV/0!	0
2113	#DIV/0!	#DIV/0!	#DIV/0!	#DIV/0!	0
2853	#DIV/0!	#DIV/0!	#DIV/0!	#DIV/0!	0
2854	#DIV/0!	#DIV/0!	#DIV/0!	#DIV/0!	0
2855	#DIV/0!	#DIV/0!	#DIV/0!	#DIV/0!	0
2856	#DIV/0!	#DIV/0!	#DIV/0!	#DIV/0!	0
2857	#DIV/0!	#DIV/0!	#DIV/0!	#DIV/0!	0
2858	#DIV/0!	#DIV/0!	#DIV/0!	#DIV/0!	0
2112	#DIV/0!	#DIV/0!	#DIV/0!	#DIV/0!	0
2752	#DIV/0!	#DIV/0!	#DIV/0!	#DIV/0!	0
2865	#DIV/0!	#DIV/0!	#DIV/0!	#DIV/0!	0
2111	#DIV/0!	#DIV/0!	#DIV/0!	#DIV/0!	0
2866	#DIV/0!	#DIV/0!	#DIV/0!	#DIV/0!	0
2110	#DIV/0!	#DIV/0!	#DIV/0!	#DIV/0!	0
2868	#DIV/0!	#DIV/0!	#DIV/0!	#DIV/0!	0
2869	#DIV/0!	#DIV/0!	#DIV/0!	#DIV/0!	0
2852	#DIV/0!	#DIV/0!	#DIV/0!	#DIV/0!	0
2851	#DIV/0!	#DIV/0!	#DIV/0!	#DIV/0!	0
2849	#DIV/0!	#DIV/0!	#DIV/0!	#DIV/0!	0
2114	#DIV/0!	#DIV/0!	#DIV/0!	#DIV/0!	0
2848	#DIV/0!	#DIV/0!	#DIV/0!	#DIV/0!	0
2847	#DIV/0!	#DIV/0!	#DIV/0!	#DIV/0!	0
2117	#DIV/0!	#DIV/0!	#DIV/0!	#DIV/0!	0
2846	#DIV/0!	#DIV/0!	#DIV/0!	#DIV/0!	0
2119	#DIV/0!	#DIV/0!	#DIV/0!	#DIV/0!	0
2120	#DIV/0!	#DIV/0!	#DIV/0!	#DIV/0!	0
2121	#DIV/0!	#DIV/0!	#DIV/0!	#DIV/0!	0
2126	#DIV/0!	#DIV/0!	#DIV/0!	#DIV/0!	0
2127	#DIV/0!	#DIV/0!	#DIV/0!	#DIV/0!	0
2845	#DIV/0!	#DIV/0!	#DIV/0!	#DIV/0!	0
2129	#DIV/0!	#DIV/0!	#DIV/0!	#DIV/0!	0
2131	#DIV/0!	#DIV/0!	#DIV/0!	#DIV/0!	0
2844	#DIV/0!	#DIV/0!	#DIV/0!	#DIV/0!	0
2109	#DIV/0!	#DIV/0!	#DIV/0!	#DIV/0!	0
2870	#DIV/0!	#DIV/0!	#DIV/0!	#DIV/0!	0
2108	#DIV/0!	#DIV/0!	#DIV/0!	#DIV/0!	0
2093	#DIV/0!	#DIV/0!	#DIV/0!	#DIV/0!	0
2082	#DIV/0!	#DIV/0!	#DIV/0!	#DIV/0!	0
2083	#DIV/0!	#DIV/0!	#DIV/0!	#DIV/0!	0
2891	#DIV/0!	#DIV/0!	#DIV/0!	#DIV/0!	0
2086	#DIV/0!	#DIV/0!	#DIV/0!	#DIV/0!	0
2889	#DIV/0!	#DIV/0!	#DIV/0!	#DIV/0!	0
2087	#DIV/0!	#DIV/0!	#DIV/0!	#DIV/0!	0
2888	#DIV/0!	#DIV/0!	#DIV/0!	#DIV/0!	0
2887	#DIV/0!	#DIV/0!	#DIV/0!	#DIV/0!	0
2885	#DIV/0!	#DIV/0!	#DIV/0!	#DIV/0!	0
2884	#DIV/0!	#DIV/0!	#DIV/0!	#DIV/0!	0
2883	#DIV/0!	#DIV/0!	#DIV/0!	#DIV/0!	0
2091	#DIV/0!	#DIV/0!	#DIV/0!	#DIV/0!	0
2881	#DIV/0!	#DIV/0!	#DIV/0!	#DIV/0!	0
2880	#DIV/0!	#DIV/0!	#DIV/0!	#DIV/0!	0
2094	#DIV/0!	#DIV/0!	#DIV/0!	#DIV/0!	0
2107	#DIV/0!	#DIV/0!	#DIV/0!	#DIV/0!	0
2096	#DIV/0!	#DIV/0!	#DIV/0!	#DIV/0!	0
2097	#DIV/0!	#DIV/0!	#DIV/0!	#DIV/0!	0
2877	#DIV/0!	#DIV/0!	#DIV/0!	#DIV/0!	0
2876	#DIV/0!	#DIV/0!	#DIV/0!	#DIV/0!	0
2874	#DIV/0!	#DIV/0!	#DIV/0!	#DIV/0!	0
2098	#DIV/0!	#DIV/0!	#DIV/0!	#DIV/0!	0
2099	#DIV/0!	#DIV/0!	#DIV/0!	#DIV/0!	0
2101	#DIV/0!	#DIV/0!	#DIV/0!	#DIV/0!	0
2873	#DIV/0!	#DIV/0!	#DIV/0!	#DIV/0!	0
2872	#DIV/0!	#DIV/0!	#DIV/0!	#DIV/0!	0
2103	#DIV/0!	#DIV/0!	#DIV/0!	#DIV/0!	0
2104	#DIV/0!	#DIV/0!	#DIV/0!	#DIV/0!	0
2105	#DIV/0!	#DIV/0!	#DIV/0!	#DIV/0!	0
2871	#DIV/0!	#DIV/0!	#DIV/0!	#DIV/0!	0
2841	#DIV/0!	#DIV/0!	#DIV/0!	#DIV/0!	0
2132	#DIV/0!	#DIV/0!	#DIV/0!	#DIV/0!	0
2135	#DIV/0!	#DIV/0!	#DIV/0!	#DIV/0!	0
2787	#DIV/0!	#DIV/0!	#DIV/0!	#DIV/0!	0
2179	#DIV/0!	#DIV/0!	#DIV/0!	#DIV/0!	0
2180	#DIV/0!	#DIV/0!	#DIV/0!	#DIV/0!	0
2814	#DIV/0!	#DIV/0!	#DIV/0!	#DIV/0!	0
2812	#DIV/0!	#DIV/0!	#DIV/0!	#DIV/0!	0
2182	#DIV/0!	#DIV/0!	#DIV/0!	#DIV/0!	0
2810	#DIV/0!	#DIV/0!	#DIV/0!	#DIV/0!	0
2809	#DIV/0!	#DIV/0!	#DIV/0!	#DIV/0!	0
2808	#DIV/0!	#DIV/0!	#DIV/0!	#DIV/0!	0
2804	#DIV/0!	#DIV/0!	#DIV/0!	#DIV/0!	0
2187	#DIV/0!	#DIV/0!	#DIV/0!	#DIV/0!	0
2794	#DIV/0!	#DIV/0!	#DIV/0!	#DIV/0!	0
2792	#DIV/0!	#DIV/0!	#DIV/0!	#DIV/0!	0
2791	#DIV/0!	#DIV/0!	#DIV/0!	#DIV/0!	0
2190	#DIV/0!	#DIV/0!	#DIV/0!	#DIV/0!	0
2785	#DIV/0!	#DIV/0!	#DIV/0!	#DIV/0!	0
2817	#DIV/0!	#DIV/0!	#DIV/0!	#DIV/0!	0
2192	#DIV/0!	#DIV/0!	#DIV/0!	#DIV/0!	0
2782	#DIV/0!	#DIV/0!	#DIV/0!	#DIV/0!	0
2781	#DIV/0!	#DIV/0!	#DIV/0!	#DIV/0!	0
2196	#DIV/0!	#DIV/0!	#DIV/0!	#DIV/0!	0
2779	#DIV/0!	#DIV/0!	#DIV/0!	#DIV/0!	0
2198	#DIV/0!	#DIV/0!	#DIV/0!	#DIV/0!	0
2199	#DIV/0!	#DIV/0!	#DIV/0!	#DIV/0!	0
2765	#DIV/0!	#DIV/0!	#DIV/0!	#DIV/0!	0
2755	#DIV/0!	#DIV/0!	#DIV/0!	#DIV/0!	0
2200	#DIV/0!	#DIV/0!	#DIV/0!	#DIV/0!	0
2201	#DIV/0!	#DIV/0!	#DIV/0!	#DIV/0!	0
2202	#DIV/0!	#DIV/0!	#DIV/0!	#DIV/0!	0
2753	#DIV/0!	#DIV/0!	#DIV/0!	#DIV/0!	0
2204	#DIV/0!	#DIV/0!	#DIV/0!	#DIV/0!	0
2816	#DIV/0!	#DIV/0!	#DIV/0!	#DIV/0!	0
2178	#DIV/0!	#DIV/0!	#DIV/0!	#DIV/0!	0
2839	#DIV/0!	#DIV/0!	#DIV/0!	#DIV/0!	0
2162	#DIV/0!	#DIV/0!	#DIV/0!	#DIV/0!	0
2137	#DIV/0!	#DIV/0!	#DIV/0!	#DIV/0!	0
2138	#DIV/0!	#DIV/0!	#DIV/0!	#DIV/0!	0
2139	#DIV/0!	#DIV/0!	#DIV/0!	#DIV/0!	0
2140	#DIV/0!	#DIV/0!	#DIV/0!	#DIV/0!	0
2141	#DIV/0!	#DIV/0!	#DIV/0!	#DIV/0!	0
2142	#DIV/0!	#DIV/0!	#DIV/0!	#DIV/0!	0
2143	#DIV/0!	#DIV/0!	#DIV/0!	#DIV/0!	0
2144	#DIV/0!	#DIV/0!	#DIV/0!	#DIV/0!	0
2145	#DIV/0!	#DIV/0!	#DIV/0!	#DIV/0!	0
2146	#DIV/0!	#DIV/0!	#DIV/0!	#DIV/0!	0
2151	#DIV/0!	#DIV/0!	#DIV/0!	#DIV/0!	0
2155	#DIV/0!	#DIV/0!	#DIV/0!	#DIV/0!	0
2158	#DIV/0!	#DIV/0!	#DIV/0!	#DIV/0!	0
2159	#DIV/0!	#DIV/0!	#DIV/0!	#DIV/0!	0
2835	#DIV/0!	#DIV/0!	#DIV/0!	#DIV/0!	0
2177	#DIV/0!	#DIV/0!	#DIV/0!	#DIV/0!	0
2164	#DIV/0!	#DIV/0!	#DIV/0!	#DIV/0!	0
2833	#DIV/0!	#DIV/0!	#DIV/0!	#DIV/0!	0
2828	#DIV/0!	#DIV/0!	#DIV/0!	#DIV/0!	0
2168	#DIV/0!	#DIV/0!	#DIV/0!	#DIV/0!	0
2169	#DIV/0!	#DIV/0!	#DIV/0!	#DIV/0!	0
2827	#DIV/0!	#DIV/0!	#DIV/0!	#DIV/0!	0
2826	#DIV/0!	#DIV/0!	#DIV/0!	#DIV/0!	0
2173	#DIV/0!	#DIV/0!	#DIV/0!	#DIV/0!	0
2174	#DIV/0!	#DIV/0!	#DIV/0!	#DIV/0!	0
2824	#DIV/0!	#DIV/0!	#DIV/0!	#DIV/0!	0
2822	#DIV/0!	#DIV/0!	#DIV/0!	#DIV/0!	0
2820	#DIV/0!	#DIV/0!	#DIV/0!	#DIV/0!	0
2176	#DIV/0!	#DIV/0!	#DIV/0!	#DIV/0!	0
2819	#DIV/0!	#DIV/0!	#DIV/0!	#DIV/0!	0
1906	#DIV/0!	#DIV/0!	#DIV/0!	#DIV/0!	0
1533	#DIV/0!	#DIV/0!	#DIV/0!	#DIV/0!	0
1904	#DIV/0!	#DIV/0!	#DIV/0!	#DIV/0!	0
907	#DIV/0!	#DIV/0!	#DIV/0!	#DIV/0!	0
905	#DIV/0!	#DIV/0!	#DIV/0!	#DIV/0!	0
903	#DIV/0!	#DIV/0!	#DIV/0!	#DIV/0!	0
902	#DIV/0!	#DIV/0!	#DIV/0!	#DIV/0!	0
900	#DIV/0!	#DIV/0!	#DIV/0!	#DIV/0!	0
899	#DIV/0!	#DIV/0!	#DIV/0!	#DIV/0!	0
897	#DIV/0!	#DIV/0!	#DIV/0!	#DIV/0!	0
896	#DIV/0!	#DIV/0!	#DIV/0!	#DIV/0!	0
895	#DIV/0!	#DIV/0!	#DIV/0!	#DIV/0!	0
894	#DIV/0!	#DIV/0!	#DIV/0!	#DIV/0!	0
892	#DIV/0!	#DIV/0!	#DIV/0!	#DIV/0!	0
891	#DIV/0!	#DIV/0!	#DIV/0!	#DIV/0!	0
890	#DIV/0!	#DIV/0!	#DIV/0!	#DIV/0!	0
889	#DIV/0!	#DIV/0!	#DIV/0!	#DIV/0!	0
887	#DIV/0!	#DIV/0!	#DIV/0!	#DIV/0!	0
882	#DIV/0!	#DIV/0!	#DIV/0!	#DIV/0!	0
880	#DIV/0!	#DIV/0!	#DIV/0!	#DIV/0!	0
879	#DIV/0!	#DIV/0!	#DIV/0!	#DIV/0!	0
878	#DIV/0!	#DIV/0!	#DIV/0!	#DIV/0!	0
877	#DIV/0!	#DIV/0!	#DIV/0!	#DIV/0!	0
876	#DIV/0!	#DIV/0!	#DIV/0!	#DIV/0!	0
870	#DIV/0!	#DIV/0!	#DIV/0!	#DIV/0!	0
867	#DIV/0!	#DIV/0!	#DIV/0!	#DIV/0!	0
866	#DIV/0!	#DIV/0!	#DIV/0!	#DIV/0!	0
863	#DIV/0!	#DIV/0!	#DIV/0!	#DIV/0!	0
862	#DIV/0!	#DIV/0!	#DIV/0!	#DIV/0!	0
861	#DIV/0!	#DIV/0!	#DIV/0!	#DIV/0!	0
860	#DIV/0!	#DIV/0!	#DIV/0!	#DIV/0!	0
906	#DIV/0!	#DIV/0!	#DIV/0!	#DIV/0!	0
908	#DIV/0!	#DIV/0!	#DIV/0!	#DIV/0!	0
576	#DIV/0!	#DIV/0!	#DIV/0!	#DIV/0!	0
909	#DIV/0!	#DIV/0!	#DIV/0!	#DIV/0!	0
956	#DIV/0!	#DIV/0!	#DIV/0!	#DIV/0!	0
955	#DIV/0!	#DIV/0!	#DIV/0!	#DIV/0!	0
954	#DIV/0!	#DIV/0!	#DIV/0!	#DIV/0!	0
953	#DIV/0!	#DIV/0!	#DIV/0!	#DIV/0!	0
951	#DIV/0!	#DIV/0!	#DIV/0!	#DIV/0!	0
950	#DIV/0!	#DIV/0!	#DIV/0!	#DIV/0!	0
949	#DIV/0!	#DIV/0!	#DIV/0!	#DIV/0!	0
948	#DIV/0!	#DIV/0!	#DIV/0!	#DIV/0!	0
947	#DIV/0!	#DIV/0!	#DIV/0!	#DIV/0!	0
945	#DIV/0!	#DIV/0!	#DIV/0!	#DIV/0!	0
944	#DIV/0!	#DIV/0!	#DIV/0!	#DIV/0!	0
943	#DIV/0!	#DIV/0!	#DIV/0!	#DIV/0!	0
942	#DIV/0!	#DIV/0!	#DIV/0!	#DIV/0!	0
938	#DIV/0!	#DIV/0!	#DIV/0!	#DIV/0!	0
937	#DIV/0!	#DIV/0!	#DIV/0!	#DIV/0!	0
936	#DIV/0!	#DIV/0!	#DIV/0!	#DIV/0!	0
935	#DIV/0!	#DIV/0!	#DIV/0!	#DIV/0!	0
934	#DIV/0!	#DIV/0!	#DIV/0!	#DIV/0!	0
932	#DIV/0!	#DIV/0!	#DIV/0!	#DIV/0!	0
931	#DIV/0!	#DIV/0!	#DIV/0!	#DIV/0!	0
928	#DIV/0!	#DIV/0!	#DIV/0!	#DIV/0!	0
925	#DIV/0!	#DIV/0!	#DIV/0!	#DIV/0!	0
924	#DIV/0!	#DIV/0!	#DIV/0!	#DIV/0!	0
916	#DIV/0!	#DIV/0!	#DIV/0!	#DIV/0!	0
912	#DIV/0!	#DIV/0!	#DIV/0!	#DIV/0!	0
911	#DIV/0!	#DIV/0!	#DIV/0!	#DIV/0!	0
910	#DIV/0!	#DIV/0!	#DIV/0!	#DIV/0!	0
859	#DIV/0!	#DIV/0!	#DIV/0!	#DIV/0!	0
858	#DIV/0!	#DIV/0!	#DIV/0!	#DIV/0!	0
857	#DIV/0!	#DIV/0!	#DIV/0!	#DIV/0!	0
856	#DIV/0!	#DIV/0!	#DIV/0!	#DIV/0!	0
622	#DIV/0!	#DIV/0!	#DIV/0!	#DIV/0!	0
621	#DIV/0!	#DIV/0!	#DIV/0!	#DIV/0!	0
620	#DIV/0!	#DIV/0!	#DIV/0!	#DIV/0!	0
619	#DIV/0!	#DIV/0!	#DIV/0!	#DIV/0!	0
617	#DIV/0!	#DIV/0!	#DIV/0!	#DIV/0!	0
616	#DIV/0!	#DIV/0!	#DIV/0!	#DIV/0!	0
615	#DIV/0!	#DIV/0!	#DIV/0!	#DIV/0!	0
614	#DIV/0!	#DIV/0!	#DIV/0!	#DIV/0!	0
609	#DIV/0!	#DIV/0!	#DIV/0!	#DIV/0!	0
608	#DIV/0!	#DIV/0!	#DIV/0!	#DIV/0!	0
607	#DIV/0!	#DIV/0!	#DIV/0!	#DIV/0!	0
606	#DIV/0!	#DIV/0!	#DIV/0!	#DIV/0!	0
605	#DIV/0!	#DIV/0!	#DIV/0!	#DIV/0!	0
604	#DIV/0!	#DIV/0!	#DIV/0!	#DIV/0!	0
603	#DIV/0!	#DIV/0!	#DIV/0!	#DIV/0!	0
601	#DIV/0!	#DIV/0!	#DIV/0!	#DIV/0!	0
600	#DIV/0!	#DIV/0!	#DIV/0!	#DIV/0!	0
597	#DIV/0!	#DIV/0!	#DIV/0!	#DIV/0!	0
594	#DIV/0!	#DIV/0!	#DIV/0!	#DIV/0!	0
593	#DIV/0!	#DIV/0!	#DIV/0!	#DIV/0!	0
592	#DIV/0!	#DIV/0!	#DIV/0!	#DIV/0!	0
591	#DIV/0!	#DIV/0!	#DIV/0!	#DIV/0!	0
589	#DIV/0!	#DIV/0!	#DIV/0!	#DIV/0!	0
587	#DIV/0!	#DIV/0!	#DIV/0!	#DIV/0!	0
586	#DIV/0!	#DIV/0!	#DIV/0!	#DIV/0!	0
582	#DIV/0!	#DIV/0!	#DIV/0!	#DIV/0!	0
581	#DIV/0!	#DIV/0!	#DIV/0!	#DIV/0!	0
623	#DIV/0!	#DIV/0!	#DIV/0!	#DIV/0!	0
624	#DIV/0!	#DIV/0!	#DIV/0!	#DIV/0!	0
625	#DIV/0!	#DIV/0!	#DIV/0!	#DIV/0!	0
757	#DIV/0!	#DIV/0!	#DIV/0!	#DIV/0!	0
854	#DIV/0!	#DIV/0!	#DIV/0!	#DIV/0!	0
852	#DIV/0!	#DIV/0!	#DIV/0!	#DIV/0!	0
851	#DIV/0!	#DIV/0!	#DIV/0!	#DIV/0!	0
845	#DIV/0!	#DIV/0!	#DIV/0!	#DIV/0!	0
843	#DIV/0!	#DIV/0!	#DIV/0!	#DIV/0!	0
842	#DIV/0!	#DIV/0!	#DIV/0!	#DIV/0!	0
836	#DIV/0!	#DIV/0!	#DIV/0!	#DIV/0!	0
825	#DIV/0!	#DIV/0!	#DIV/0!	#DIV/0!	0
814	#DIV/0!	#DIV/0!	#DIV/0!	#DIV/0!	0
797	#DIV/0!	#DIV/0!	#DIV/0!	#DIV/0!	0
792	#DIV/0!	#DIV/0!	#DIV/0!	#DIV/0!	0
789	#DIV/0!	#DIV/0!	#DIV/0!	#DIV/0!	0
753	#DIV/0!	#DIV/0!	#DIV/0!	#DIV/0!	0
626	#DIV/0!	#DIV/0!	#DIV/0!	#DIV/0!	0
706	#DIV/0!	#DIV/0!	#DIV/0!	#DIV/0!	0
701	#DIV/0!	#DIV/0!	#DIV/0!	#DIV/0!	0
697	#DIV/0!	#DIV/0!	#DIV/0!	#DIV/0!	0
690	#DIV/0!	#DIV/0!	#DIV/0!	#DIV/0!	0
639	#DIV/0!	#DIV/0!	#DIV/0!	#DIV/0!	0
634	#DIV/0!	#DIV/0!	#DIV/0!	#DIV/0!	0
633	#DIV/0!	#DIV/0!	#DIV/0!	#DIV/0!	0
632	#DIV/0!	#DIV/0!	#DIV/0!	#DIV/0!	0
631	#DIV/0!	#DIV/0!	#DIV/0!	#DIV/0!	0
630	#DIV/0!	#DIV/0!	#DIV/0!	#DIV/0!	0
629	#DIV/0!	#DIV/0!	#DIV/0!	#DIV/0!	0
627	#DIV/0!	#DIV/0!	#DIV/0!	#DIV/0!	0
957	#DIV/0!	#DIV/0!	#DIV/0!	#DIV/0!	0
958	#DIV/0!	#DIV/0!	#DIV/0!	#DIV/0!	0
959	#DIV/0!	#DIV/0!	#DIV/0!	#DIV/0!	0
1047	#DIV/0!	#DIV/0!	#DIV/0!	#DIV/0!	0
1080	#DIV/0!	#DIV/0!	#DIV/0!	#DIV/0!	0
1079	#DIV/0!	#DIV/0!	#DIV/0!	#DIV/0!	0
1078	#DIV/0!	#DIV/0!	#DIV/0!	#DIV/0!	0
1077	#DIV/0!	#DIV/0!	#DIV/0!	#DIV/0!	0
1076	#DIV/0!	#DIV/0!	#DIV/0!	#DIV/0!	0
1075	#DIV/0!	#DIV/0!	#DIV/0!	#DIV/0!	0
1074	#DIV/0!	#DIV/0!	#DIV/0!	#DIV/0!	0
1073	#DIV/0!	#DIV/0!	#DIV/0!	#DIV/0!	0
1072	#DIV/0!	#DIV/0!	#DIV/0!	#DIV/0!	0
1071	#DIV/0!	#DIV/0!	#DIV/0!	#DIV/0!	0
1070	#DIV/0!	#DIV/0!	#DIV/0!	#DIV/0!	0
1069	#DIV/0!	#DIV/0!	#DIV/0!	#DIV/0!	0
1068	#DIV/0!	#DIV/0!	#DIV/0!	#DIV/0!	0
1067	#DIV/0!	#DIV/0!	#DIV/0!	#DIV/0!	0
1066	#DIV/0!	#DIV/0!	#DIV/0!	#DIV/0!	0
1065	#DIV/0!	#DIV/0!	#DIV/0!	#DIV/0!	0
1064	#DIV/0!	#DIV/0!	#DIV/0!	#DIV/0!	0
1062	#DIV/0!	#DIV/0!	#DIV/0!	#DIV/0!	0
1061	#DIV/0!	#DIV/0!	#DIV/0!	#DIV/0!	0
1060	#DIV/0!	#DIV/0!	#DIV/0!	#DIV/0!	0
1059	#DIV/0!	#DIV/0!	#DIV/0!	#DIV/0!	0
1058	#DIV/0!	#DIV/0!	#DIV/0!	#DIV/0!	0
1056	#DIV/0!	#DIV/0!	#DIV/0!	#DIV/0!	0
1055	#DIV/0!	#DIV/0!	#DIV/0!	#DIV/0!	0
1052	#DIV/0!	#DIV/0!	#DIV/0!	#DIV/0!	0
1050	#DIV/0!	#DIV/0!	#DIV/0!	#DIV/0!	0
1049	#DIV/0!	#DIV/0!	#DIV/0!	#DIV/0!	0
1083	#DIV/0!	#DIV/0!	#DIV/0!	#DIV/0!	0
1085	#DIV/0!	#DIV/0!	#DIV/0!	#DIV/0!	0
1086	#DIV/0!	#DIV/0!	#DIV/0!	#DIV/0!	0
1103	#DIV/0!	#DIV/0!	#DIV/0!	#DIV/0!	0
1115	#DIV/0!	#DIV/0!	#DIV/0!	#DIV/0!	0
1114	#DIV/0!	#DIV/0!	#DIV/0!	#DIV/0!	0
1113	#DIV/0!	#DIV/0!	#DIV/0!	#DIV/0!	0
1112	#DIV/0!	#DIV/0!	#DIV/0!	#DIV/0!	0
1111	#DIV/0!	#DIV/0!	#DIV/0!	#DIV/0!	0
1110	#DIV/0!	#DIV/0!	#DIV/0!	#DIV/0!	0
1109	#DIV/0!	#DIV/0!	#DIV/0!	#DIV/0!	0
1108	#DIV/0!	#DIV/0!	#DIV/0!	#DIV/0!	0
1107	#DIV/0!	#DIV/0!	#DIV/0!	#DIV/0!	0
1106	#DIV/0!	#DIV/0!	#DIV/0!	#DIV/0!	0
1105	#DIV/0!	#DIV/0!	#DIV/0!	#DIV/0!	0
1104	#DIV/0!	#DIV/0!	#DIV/0!	#DIV/0!	0
1102	#DIV/0!	#DIV/0!	#DIV/0!	#DIV/0!	0
1088	#DIV/0!	#DIV/0!	#DIV/0!	#DIV/0!	0
1101	#DIV/0!	#DIV/0!	#DIV/0!	#DIV/0!	0
1100	#DIV/0!	#DIV/0!	#DIV/0!	#DIV/0!	0
1099	#DIV/0!	#DIV/0!	#DIV/0!	#DIV/0!	0
1098	#DIV/0!	#DIV/0!	#DIV/0!	#DIV/0!	0
1097	#DIV/0!	#DIV/0!	#DIV/0!	#DIV/0!	0
1095	#DIV/0!	#DIV/0!	#DIV/0!	#DIV/0!	0
1094	#DIV/0!	#DIV/0!	#DIV/0!	#DIV/0!	0
1093	#DIV/0!	#DIV/0!	#DIV/0!	#DIV/0!	0
1092	#DIV/0!	#DIV/0!	#DIV/0!	#DIV/0!	0
1091	#DIV/0!	#DIV/0!	#DIV/0!	#DIV/0!	0
1090	#DIV/0!	#DIV/0!	#DIV/0!	#DIV/0!	0
1089	#DIV/0!	#DIV/0!	#DIV/0!	#DIV/0!	0
1048	#DIV/0!	#DIV/0!	#DIV/0!	#DIV/0!	0
1046	#DIV/0!	#DIV/0!	#DIV/0!	#DIV/0!	0
962	#DIV/0!	#DIV/0!	#DIV/0!	#DIV/0!	0
1044	#DIV/0!	#DIV/0!	#DIV/0!	#DIV/0!	0
1000	#DIV/0!	#DIV/0!	#DIV/0!	#DIV/0!	0
999	#DIV/0!	#DIV/0!	#DIV/0!	#DIV/0!	0
998	#DIV/0!	#DIV/0!	#DIV/0!	#DIV/0!	0
997	#DIV/0!	#DIV/0!	#DIV/0!	#DIV/0!	0
996	#DIV/0!	#DIV/0!	#DIV/0!	#DIV/0!	0
995	#DIV/0!	#DIV/0!	#DIV/0!	#DIV/0!	0
993	#DIV/0!	#DIV/0!	#DIV/0!	#DIV/0!	0
992	#DIV/0!	#DIV/0!	#DIV/0!	#DIV/0!	0
991	#DIV/0!	#DIV/0!	#DIV/0!	#DIV/0!	0
990	#DIV/0!	#DIV/0!	#DIV/0!	#DIV/0!	0
984	#DIV/0!	#DIV/0!	#DIV/0!	#DIV/0!	0
983	#DIV/0!	#DIV/0!	#DIV/0!	#DIV/0!	0
982	#DIV/0!	#DIV/0!	#DIV/0!	#DIV/0!	0
981	#DIV/0!	#DIV/0!	#DIV/0!	#DIV/0!	0
980	#DIV/0!	#DIV/0!	#DIV/0!	#DIV/0!	0
979	#DIV/0!	#DIV/0!	#DIV/0!	#DIV/0!	0
978	#DIV/0!	#DIV/0!	#DIV/0!	#DIV/0!	0
977	#DIV/0!	#DIV/0!	#DIV/0!	#DIV/0!	0
976	#DIV/0!	#DIV/0!	#DIV/0!	#DIV/0!	0
975	#DIV/0!	#DIV/0!	#DIV/0!	#DIV/0!	0
974	#DIV/0!	#DIV/0!	#DIV/0!	#DIV/0!	0
973	#DIV/0!	#DIV/0!	#DIV/0!	#DIV/0!	0
972	#DIV/0!	#DIV/0!	#DIV/0!	#DIV/0!	0
971	#DIV/0!	#DIV/0!	#DIV/0!	#DIV/0!	0
970	#DIV/0!	#DIV/0!	#DIV/0!	#DIV/0!	0
967	#DIV/0!	#DIV/0!	#DIV/0!	#DIV/0!	0
965	#DIV/0!	#DIV/0!	#DIV/0!	#DIV/0!	0
1001	#DIV/0!	#DIV/0!	#DIV/0!	#DIV/0!	0
1002	#DIV/0!	#DIV/0!	#DIV/0!	#DIV/0!	0
1003	#DIV/0!	#DIV/0!	#DIV/0!	#DIV/0!	0
1021	#DIV/0!	#DIV/0!	#DIV/0!	#DIV/0!	0
1043	#DIV/0!	#DIV/0!	#DIV/0!	#DIV/0!	0
1042	#DIV/0!	#DIV/0!	#DIV/0!	#DIV/0!	0
1041	#DIV/0!	#DIV/0!	#DIV/0!	#DIV/0!	0
1039	#DIV/0!	#DIV/0!	#DIV/0!	#DIV/0!	0
1038	#DIV/0!	#DIV/0!	#DIV/0!	#DIV/0!	0
1037	#DIV/0!	#DIV/0!	#DIV/0!	#DIV/0!	0
1034	#DIV/0!	#DIV/0!	#DIV/0!	#DIV/0!	0
1033	#DIV/0!	#DIV/0!	#DIV/0!	#DIV/0!	0
1028	#DIV/0!	#DIV/0!	#DIV/0!	#DIV/0!	0
1027	#DIV/0!	#DIV/0!	#DIV/0!	#DIV/0!	0
1026	#DIV/0!	#DIV/0!	#DIV/0!	#DIV/0!	0
1022	#DIV/0!	#DIV/0!	#DIV/0!	#DIV/0!	0
1020	#DIV/0!	#DIV/0!	#DIV/0!	#DIV/0!	0
1004	#DIV/0!	#DIV/0!	#DIV/0!	#DIV/0!	0
1019	#DIV/0!	#DIV/0!	#DIV/0!	#DIV/0!	0
1018	#DIV/0!	#DIV/0!	#DIV/0!	#DIV/0!	0
1016	#DIV/0!	#DIV/0!	#DIV/0!	#DIV/0!	0
1015	#DIV/0!	#DIV/0!	#DIV/0!	#DIV/0!	0
1014	#DIV/0!	#DIV/0!	#DIV/0!	#DIV/0!	0
1013	#DIV/0!	#DIV/0!	#DIV/0!	#DIV/0!	0
1012	#DIV/0!	#DIV/0!	#DIV/0!	#DIV/0!	0
1011	#DIV/0!	#DIV/0!	#DIV/0!	#DIV/0!	0
1010	#DIV/0!	#DIV/0!	#DIV/0!	#DIV/0!	0
1008	#DIV/0!	#DIV/0!	#DIV/0!	#DIV/0!	0
1006	#DIV/0!	#DIV/0!	#DIV/0!	#DIV/0!	0
1005	#DIV/0!	#DIV/0!	#DIV/0!	#DIV/0!	0
577	#DIV/0!	#DIV/0!	#DIV/0!	#DIV/0!	0
575	#DIV/0!	#DIV/0!	#DIV/0!	#DIV/0!	0
1903	#DIV/0!	#DIV/0!	#DIV/0!	#DIV/0!	0
226	#DIV/0!	#DIV/0!	#DIV/0!	#DIV/0!	0
222	#DIV/0!	#DIV/0!	#DIV/0!	#DIV/0!	0
221	#DIV/0!	#DIV/0!	#DIV/0!	#DIV/0!	0
220	#DIV/0!	#DIV/0!	#DIV/0!	#DIV/0!	0
219	#DIV/0!	#DIV/0!	#DIV/0!	#DIV/0!	0
218	#DIV/0!	#DIV/0!	#DIV/0!	#DIV/0!	0
211	#DIV/0!	#DIV/0!	#DIV/0!	#DIV/0!	0
210	#DIV/0!	#DIV/0!	#DIV/0!	#DIV/0!	0
209	#DIV/0!	#DIV/0!	#DIV/0!	#DIV/0!	0
208	#DIV/0!	#DIV/0!	#DIV/0!	#DIV/0!	0
207	#DIV/0!	#DIV/0!	#DIV/0!	#DIV/0!	0
205	#DIV/0!	#DIV/0!	#DIV/0!	#DIV/0!	0
204	#DIV/0!	#DIV/0!	#DIV/0!	#DIV/0!	0
203	#DIV/0!	#DIV/0!	#DIV/0!	#DIV/0!	0
202	#DIV/0!	#DIV/0!	#DIV/0!	#DIV/0!	0
199	#DIV/0!	#DIV/0!	#DIV/0!	#DIV/0!	0
189	#DIV/0!	#DIV/0!	#DIV/0!	#DIV/0!	0
188	#DIV/0!	#DIV/0!	#DIV/0!	#DIV/0!	0
186	#DIV/0!	#DIV/0!	#DIV/0!	#DIV/0!	0
184	#DIV/0!	#DIV/0!	#DIV/0!	#DIV/0!	0
183	#DIV/0!	#DIV/0!	#DIV/0!	#DIV/0!	0
182	#DIV/0!	#DIV/0!	#DIV/0!	#DIV/0!	0
179	#DIV/0!	#DIV/0!	#DIV/0!	#DIV/0!	0
175	#DIV/0!	#DIV/0!	#DIV/0!	#DIV/0!	0
174	#DIV/0!	#DIV/0!	#DIV/0!	#DIV/0!	0
172	#DIV/0!	#DIV/0!	#DIV/0!	#DIV/0!	0
171	#DIV/0!	#DIV/0!	#DIV/0!	#DIV/0!	0
167	#DIV/0!	#DIV/0!	#DIV/0!	#DIV/0!	0
225	#DIV/0!	#DIV/0!	#DIV/0!	#DIV/0!	0
227	#DIV/0!	#DIV/0!	#DIV/0!	#DIV/0!	0
574	#DIV/0!	#DIV/0!	#DIV/0!	#DIV/0!	0
228	#DIV/0!	#DIV/0!	#DIV/0!	#DIV/0!	0
296	#DIV/0!	#DIV/0!	#DIV/0!	#DIV/0!	0
291	#DIV/0!	#DIV/0!	#DIV/0!	#DIV/0!	0
287	#DIV/0!	#DIV/0!	#DIV/0!	#DIV/0!	0
286	#DIV/0!	#DIV/0!	#DIV/0!	#DIV/0!	0
285	#DIV/0!	#DIV/0!	#DIV/0!	#DIV/0!	0
284	#DIV/0!	#DIV/0!	#DIV/0!	#DIV/0!	0
281	#DIV/0!	#DIV/0!	#DIV/0!	#DIV/0!	0
280	#DIV/0!	#DIV/0!	#DIV/0!	#DIV/0!	0
279	#DIV/0!	#DIV/0!	#DIV/0!	#DIV/0!	0
278	#DIV/0!	#DIV/0!	#DIV/0!	#DIV/0!	0
277	#DIV/0!	#DIV/0!	#DIV/0!	#DIV/0!	0
276	#DIV/0!	#DIV/0!	#DIV/0!	#DIV/0!	0
275	#DIV/0!	#DIV/0!	#DIV/0!	#DIV/0!	0
274	#DIV/0!	#DIV/0!	#DIV/0!	#DIV/0!	0
273	#DIV/0!	#DIV/0!	#DIV/0!	#DIV/0!	0
272	#DIV/0!	#DIV/0!	#DIV/0!	#DIV/0!	0
271	#DIV/0!	#DIV/0!	#DIV/0!	#DIV/0!	0
270	#DIV/0!	#DIV/0!	#DIV/0!	#DIV/0!	0
269	#DIV/0!	#DIV/0!	#DIV/0!	#DIV/0!	0
268	#DIV/0!	#DIV/0!	#DIV/0!	#DIV/0!	0
267	#DIV/0!	#DIV/0!	#DIV/0!	#DIV/0!	0
266	#DIV/0!	#DIV/0!	#DIV/0!	#DIV/0!	0
265	#DIV/0!	#DIV/0!	#DIV/0!	#DIV/0!	0
260	#DIV/0!	#DIV/0!	#DIV/0!	#DIV/0!	0
246	#DIV/0!	#DIV/0!	#DIV/0!	#DIV/0!	0
231	#DIV/0!	#DIV/0!	#DIV/0!	#DIV/0!	0
230	#DIV/0!	#DIV/0!	#DIV/0!	#DIV/0!	0
166	#DIV/0!	#DIV/0!	#DIV/0!	#DIV/0!	0
165	#DIV/0!	#DIV/0!	#DIV/0!	#DIV/0!	0
148	#DIV/0!	#DIV/0!	#DIV/0!	#DIV/0!	0
142	#DIV/0!	#DIV/0!	#DIV/0!	#DIV/0!	0
65	#DIV/0!	#DIV/0!	#DIV/0!	#DIV/0!	0
64	#DIV/0!	#DIV/0!	#DIV/0!	#DIV/0!	0
62	#DIV/0!	#DIV/0!	#DIV/0!	#DIV/0!	0
61	#DIV/0!	#DIV/0!	#DIV/0!	#DIV/0!	0
60	#DIV/0!	#DIV/0!	#DIV/0!	#DIV/0!	0
59	#DIV/0!	#DIV/0!	#DIV/0!	#DIV/0!	0
58	#DIV/0!	#DIV/0!	#DIV/0!	#DIV/0!	0
57	#DIV/0!	#DIV/0!	#DIV/0!	#DIV/0!	0
56	#DIV/0!	#DIV/0!	#DIV/0!	#DIV/0!	0
55	#DIV/0!	#DIV/0!	#DIV/0!	#DIV/0!	0
54	#DIV/0!	#DIV/0!	#DIV/0!	#DIV/0!	0
53	#DIV/0!	#DIV/0!	#DIV/0!	#DIV/0!	0
[truncated: 657 more rows]

## Sheet: Summary
Reactions	RxnID	RxnName	RxnEC	RxnSubsystem	RxnGPR	EntrezGenes_1	EntrezGenes_2	NCBIGenes	Substrates	Products
1616	O2Stm	superoxide anion transport via diffusion (mitochondria)		Transport, Mitochondrial					Superoxide anion	Superoxide anion
1185	GTHOm	glutathione oxidoreductase	1.8.1.7	Glutamate metabolism	( 2936.1 )	668		FOXL2	Oxidized glutathione; H+; Nicotinamide adenine dinucleotide phosphate - reduced	Nicotinamide adenine dinucleotide phosphate
2744	NADPHtxu	NADPHtxu		Transport, Peroxisomal					Nicotinamide adenine dinucleotide phosphate - reduced	Nicotinamide adenine dinucleotide phosphate - reduced
2838	FUMt1	FUMt1							Fumarate	fum[e]
1927	SERHL	L-Serine hydro-lyase		Glycine, Serine, and Threonine Metabolism	( 10993.1 )	94		ACVRL1	ser_L[c]	2-Aminoacrylate; H2O
2055	TPI	triose-phosphate isomerase	5.3.1.1	Glycolysis/Gluconeogenesis	( 7167.1 ) or ( 286016.1 )	1562	653	CYP2C18, BMP5	Dihydroxyacetone phosphate	Glyceraldehyde 3-phosphate
1419	MELATN23DOX	Melatonin:oxygen 2,3-dioxygenase (indole-decyclizing)	1.13.11.42	Tryptophan metabolism	( 3620.1 )	790		CAD	Melatonin; O2	Formyl-N-acetyl-5-methoxykynurenamine

## Sheet: Summary_pathways
Var1	NumReactions	ListReactions
	1	FUMt1
Glutamate metabolism	1	GTHOm
Glycine, Serine, and Threonine Metabolism	1	SERHL
Glycolysis/Gluconeogenesis	1	TPI
Transport, Mitochondrial	1	O2Stm
Transport, Peroxisomal	1	NADPHtxu
Tryptophan metabolism	1	MELATN23DOX

## Sheet: Summary_genes
GeneName	NumReactions	ListReactions
	3	FUMt1, NADPHtxu, O2Stm
ACVRL1	1	SERHL
BMP5	1	TPI
CAD	1	MELATN23DOX
CYP2C18	1	TPI
FOXL2	1	GTHOm

[truncated: 10 more sheets: Summary_metabolites, Summary_substrates, Summary_products, Summary_2, Summary_pathways_2, Summary_genes_2, Summary_metabolites_2, Summary_metabolites_2_2, Summary_substrates_2, Summary_products_2]
