# Supplementary material for: Integrating Machine Learning with Metabolic Models for Precision Trauma Care: Personalized ENDOTYPE Stratification and Metabolic Target Identification
Source: Research Square preprint supplement (doi:10.21203/rs.3.rs-6258357/v1), 2025-03-27
Supplement: Supplementary file 2 [file c09897c217793181ee146684.pdf]

1           **Integrating Machine Learning with**  
2           **Metabolic Models for Precision Trauma**  
3           **Care:**  
4           **Personalized Endotype Stratification**  
5           **and Metabolic Target Identification:**  
6           **Supplementary material 6**

7           Marin de Mas I.<sup>\*1,2</sup>, Moura L.<sup>3</sup>, Antunes F.L.M.<sup>3</sup>, Guerrero  
8           J.M.<sup>4,5</sup>, and Johansson P.I.<sup>1,2</sup>

9           <sup>1</sup>CAG Center for Endotheliomics, Copenhagen University Hospital,  
10           Rigshospitalet, 2100, Copenhagen, Denmark

11           <sup>2</sup>Department of Clinical Medicine, Copenhagen University  
12           Hospital, Rigshospitalet, 2100, Copenhagen, Denmark

13           <sup>3</sup>Department of Electrical Engineering, Federal University of  
14           Ceará, Fortaleza, 60430-160, Ceará, Brazil

15           <sup>4</sup>Center for Renewable Energy and Microgrids, Huanjiang  
16           Laboratory, AAU Energy, Zhejiang University, 314423, Zhejiang,  
17           China

18           <sup>5</sup>Center for Research on Microgrids (AAU CROM), AAU Energy,  
19           Aalborg University, 9220, Aalborg , Denmark

20           **1   Methods**

21           This section describes the methodologies applied to analyze the impact of age,  
22           sex and cluster of the efficiency of the simulated treatment on patients cor-  
23           responding to Endotype D. The analysis includes Bayesian modeling, Markov  
24           Chain Monte Carlo (MCMC) sampling, model comparison criteria (WAIC and  
25           LOOIC), and prediction error evaluation using RMSE. Each subsection details  
26           the mathematical basis and explains the integration of these methods in the  
27           analysis. The methods applied here are implemented in Python file "Hierarchi-  
28           cal\_Bayesian\_Analysis.py"

---

\*Corresponding author: Marin de Mas I. Email: `igor.bartolome.marin.de.mas@regionh.dk`

## 29 1.1 Improvement Score (IS)

30 To quantify the degree of improvement in patients with Endotype D after sim-  
 31 ulating a treatment, an Improvement Score (IS) was developed. The treatment  
 32 simulation specifically targets the seven reactions associated with Cluster R<sub>2</sub>,  
 33 as depicted in Figure 4A of the main text. The IS represents the percentage  
 34 improvement in terms of the expected mortality rate (EMR) that a patient  
 35 experiences following the simulated treatment.

### 36 1.1.1 Patient Endotype Classification

37 The classification of a patient into an endotype is based on the prediction of 600  
 38 features that characterize the patient’s metabolic flux profile. These features  
 39 are predicted using an XGBoost model and form the basis for calculating the  
 40 IS.

### 41 1.1.2 Calculation of the Improvement Score

42 The IS for a given patient  $p$  is calculated using the following equation:

$$IS_p = 100 \cdot \left(1 - \frac{EMR_t}{EMR_i}\right) \quad (1)$$

43 where  $EMR_i$  and  $EMR_t$  represent the initial (pre-treatment) and treated  
 44 (post-treatment) expected mortality rates, respectively.

45 The EMR is computed as a weighted average of mortality rates across the  
 46 four endotypes (A, B, C, and D) using the following formula:

$$EMR = \frac{f_A \cdot mr_A + f_B \cdot mr_B + f_C \cdot mr_C + f_D \cdot mr_D}{\sum f} \quad (2)$$

47 Here:

- 48 •  $f_A$ ,  $f_B$ ,  $f_C$ , and  $f_D$  denote the number of features for patient  $p$  classified  
 49 into Endotypes A, B, C, and D, respectively, by the XGBoost model.
- 50 •  $mr_A$ ,  $mr_B$ ,  $mr_C$ , and  $mr_D$  represent the observed mortality rates for En-  
 51 dotypes A, B, C, and D, respectively.

52 This formulation ensures that the improvement score reflects the weighted  
 53 contribution of the metabolic features associated with each endotype to the  
 54 patient’s overall expected mortality rate.

## 55 1.2 Bayesian Modeling

56 Bayesian inference provides a probabilistic framework to estimate parameters by  
 57 combining prior information with observed data. The method relies on Bayes’  
 58 theorem:

$$P(\theta|\text{data}) = \frac{P(\text{data}|\theta)P(\theta)}{P(\text{data})}, \quad (3)$$

59 where  $P(\theta|\text{data})$  is the posterior distribution of the parameters  $\theta$ ,  $P(\text{data}|\theta)$  is  
 60 the likelihood of the observed data given the parameters,  $P(\theta)$  represents the  
 61 prior distribution, and  $P(\text{data})$  is the evidence. For this study, we modeled the

improvement scores as a function of predictors such as cluster membership, age, and sex. The linear model assumed is:

$$y_i = \beta_0 + \beta_{\text{Cluster}} \cdot \text{Cluster}_i + \beta_{\text{Sex}} \cdot \text{Sex}_i + \beta_{\text{Age}} \cdot \text{Age}_i + \epsilon_i, \quad (4)$$

where  $y_i$  is the improvement score for observation  $i$ ,  $\beta_0$  is the intercept, and  $\epsilon_i \sim \mathcal{N}(0, \sigma^2)$  is the error term. Non-informative priors were specified for all parameters to minimize prior biases. Bayesian models are particularly advantageous because they provide full posterior distributions for all parameters, allowing estimation of credible intervals and posterior predictive checks to evaluate the model's fit [1].

### 1.3 Markov Chain Monte Carlo (MCMC) Sampling

To estimate the posterior distributions of the model parameters, we used Markov Chain Monte Carlo (MCMC) sampling, specifically the No-U-Turn Sampler (NUTS), a variant of the Hamiltonian Monte Carlo algorithm. MCMC constructs a Markov chain whose equilibrium distribution approximates the target posterior. Each iteration of the chain involves:

1. A **proposal step**, where a candidate parameter value is proposed using probabilistic rules based on the current state.
2. An **acceptance step**, where the candidate is accepted with probability:

$$\alpha = \min \left( 1, \frac{P(\text{data}|\theta^*)P(\theta^*)}{P(\text{data}|\theta)P(\theta)} \right), \quad (5)$$

where  $\theta^*$  is the proposed value and  $\theta$  is the current value.

The NUTS sampler enhances efficiency by adaptively tuning step sizes and avoiding excessive computation. Convergence was assessed using trace plots and the Gelman-Rubin statistic [2], ensuring the chains adequately explored the posterior.

### 1.4 Model Comparison: WAIC and LOOIC

Model selection and comparison were performed using the Widely Applicable Information Criterion (WAIC) and Leave-One-Out Information Criterion (LOOIC). Both criteria evaluate model predictive accuracy while penalizing complexity.

**WAIC.** WAIC estimates the predictive density of new data while accounting for overfitting. It is defined as:

$$\text{WAIC} = -2 \sum_{i=1}^n \left[ \log \left( \frac{1}{S} \sum_{s=1}^S P(y_i|\theta_s) \right) \right] + 2 \sum_{i=1}^n \text{Var}_{\theta} [\log P(y_i|\theta)], \quad (6)$$

where  $y_i$  are the observed data,  $P(y_i|\theta_s)$  is the likelihood given posterior sample  $\theta_s$ , and  $S$  is the number of posterior samples. Lower WAIC values indicate better model performance [3].

94 **LOOIC.** LOOIC uses cross-validation to estimate predictive accuracy by leav-  
 95 ing out one observation at a time. It is computed as:

$$\text{LOOIC} = -2 \sum_{i=1}^n \log \left( \frac{1}{S} \sum_{s=1}^S P(y_i | \theta_s) \right). \quad (7)$$

96 We employed Pareto-smoothed importance sampling (PSIS) to efficiently ap-  
 97 proximate LOOIC [4].

## 98 1.5 Prediction Error Evaluation: RMSE

99 To complement WAIC and LOOIC, we computed the Root Mean Square Error  
 100 (RMSE) to directly evaluate prediction accuracy:

$$\text{RMSE} = \sqrt{\frac{1}{n} \sum_{i=1}^n (y_i - \hat{y}_i)^2}, \quad (8)$$

101 where  $y_i$  are the observed values, and  $\hat{y}_i$  are the predicted values. RMSE pro-  
 102 vides an intuitive metric to assess how well the model predicts the observed  
 103 data.

## 104 1.6 Integration of Methods

105 These methodologies were integrated into the analytical workflow as follows:

- 106 1. **Parameter Estimation:** Bayesian modeling with MCMC provided pos-  
 107 terior distributions for all parameters, capturing uncertainty and allowing  
 108 exploration of credible intervals.
- 109 2. **Model Comparison:** WAIC and LOOIC were used to compare models  
 110 with and without predictors (e.g., Cluster, Sex, Age) to evaluate their  
 111 relative contributions.
- 112 3. **Prediction Accuracy:** RMSE quantified prediction error to assess prac-  
 113 tical model performance.

114 Together, these methods provided a robust framework for understanding the  
 115 predictors' effects on improvement scores and evaluating model performance.

## 116 2 Results

117 This section presents the key findings from the Bayesian hierarchical modeling  
 118 analysis, which explored the effects of cluster, sex, age, and their combinations  
 119 (e.g., sex+age, sex+cluster, age+cluster) on the observed improvement scores.  
 120 The results are interpreted through posterior distributions, model diagnostics,  
 121 and visual summaries. Due to the low number of patients with Endotype D in  
 122 Clusters  $P_1$  and  $P_4$  (2 and 6 patients, respectively), Clusters  $P_1$  and  $P_2$  were  
 123 combined into a single cluster for analysis, and the same approach was applied  
 124 to Clusters  $P_3$  and  $P_4$ . This decision is further supported by the fact that  
 125 Clusters  $P_1$  and  $P_2$ , as well as Clusters  $P_3$  and  $P_4$ , exhibit identical metabolic  
 126 flux activity profiles when the seven reactions targeted for simulating potential  
 127 treatment in patients with Endotype D, and corresponding to Cluster  $R_2$ , are  
 128 excluded (See Figure 4A in the main text).

## 2.1 Improvement Score Results

The Improvement Score (IS) was calculated for a cohort of 41 patients whose treatment was simulated by targeting the seven reactions corresponding to Cluster R<sub>2</sub> (Figure 4A in the main text). Prior to the simulated treatment, all features for these patients were assigned to Endotype D by the XGBoost model, resulting in an initial expected mortality rate (EMR<sub>i</sub>) of 85% for all patients. Observed mortality rates for Endotypes A, B, C, and D were extracted from [5], with values of 15%, 25%, 30%, and 85%, respectively.

Table 1 summarizes the calculated IS for each patient after the simulated treatment, along with their corresponding sex, age, and cluster classification (as depicted in Figure 1A). The IS, representing the percentage reduction in expected mortality rate, ranged from 0% to 76.1%, with a mean IS of 18.5%.

The IS data will be further analyzed using a Bayesian model to assess potential effects of patient sex, age, and cluster membership on the observed improvement scores. This analysis aims to identify whether these factors significantly influence treatment outcomes, thereby providing insights into patient stratification and personalized treatment approaches.

### 2.1.1 Analysis of Model Parameters and Metrics

Table 2 provides a summary of the parameter estimates obtained from the Bayesian hierarchical model. The table includes posterior means, standard deviations (SD), 94% highest density intervals (HDI), effective sample sizes (ESS), and *R*-hat statistics for convergence diagnostics.

The results of the Bayesian hierarchical model parameter estimates and model comparison metrics are summarized in Table 2. Several key insights can be derived from the analysis:

- **Cluster Effects:** The mean effect for **Cluster 1** (*Cluster Effect* ( $P_1 \& P_2$ )) is 6.836 with a standard deviation (SD) of 7.859, while for **Cluster 2** (*Cluster Effect* ( $P_3 \& P_4$ )), the mean effect is 8.657 with an SD of 5.608. The 94% Highest Density Interval (HDI) for Cluster 1 ranges from  $-7.756$  to  $21.520$ , and for Cluster 2, it ranges from  $-2.015$  to  $18.922$ . These overlapping intervals suggest that while the posterior means indicate a positive effect of cluster membership, the uncertainty is high, and statistical significance cannot be established.
- **Sex Effect:** The mean effect of sex (*Sex\_Effect*) is 7.617 (SD: 7.081), with a 94% HDI spanning  $-5.163$  to  $21.479$ . This broad interval, crossing zero, implies that there is no significant difference in outcomes based on sex.
- **Age Effect:** The effect of age (*Age\_Effect*) shows a mean of  $-0.179$  (SD: 5.788) and a 94% HDI of  $-11.265$  to  $10.617$ . The interval, centered around zero, indicates a negligible influence of age on the outcome variable.
- **Interaction Effects:** Interactions between age, sex, and cluster membership reveal similarly wide intervals. For instance:
  - **Age-Cluster Interaction:** The mean effects for Cluster 1 and Cluster 2 are  $-0.215$  and  $0.029$ , respectively, with overlapping HDIs ( $-11.552$  to  $10.320$  and  $-10.122$  to  $11.700$ ), suggesting minimal interaction.

174 – **Cluster-Sex Interaction:** For Cluster 1, the mean interaction ef-  
 175 fect is 10.644 (HDI:  $-5.449$  to  $25.341$ ), while for Cluster 2, it is  
 176  $-3.261$  (HDI:  $-18.657$  to  $10.824$ ). These trends, while intriguing,  
 177 are not statistically significant.

178 • **Posterior Predictive Distribution:** The posterior distributions for all  
 179 parameters converge appropriately, as indicated by effective sample sizes  
 180 ( $ESS_{\text{bulk}}$  and  $ESS_{\text{tail}}$ ) exceeding 2,800 for all parameters, and the  $\hat{R}$  diag-  
 181 nostic being 1.0 across all estimates, confirming robust sampling.

182 • **Model Comparison and Fit:** The WAIC and LOOIC values (385.56 for  
 183 both) indicate similar predictive performance across the models. The Root  
 184 Mean Square Error (RMSE) was 33.10, highlighting the residual variabil-  
 185 ity in predictions. While the model captures some trends, considerable  
 186 uncertainty remains in the prediction of outcomes.

187 **Summary:** The analysis indicates that the effects of cluster membership  
 188 and sex show slight positive trends, but these trends are not statistically sig-  
 189 nificant given the broad credible intervals. Age, and interactions involving age,  
 190 appear to have negligible effects. Model diagnostics confirm adequate conver-  
 191 gence, but the high RMSE suggests room for improved predictive performance  
 192 with alternative model formulations or additional predictors.

## 193 2.2 Convergence Diagnostics

194 The trace plots (1A) confirm proper sampling behavior for all model param-  
 195 eters, including "Cluster Effect," "Sex Effect," and "Age Effect." The density  
 196 estimates (left panel of the trace plots) show smooth, unimodal distributions,  
 197 while the chains (right panel) exhibit stable mixing with no autocorrelation or  
 198 trends, confirming convergence to the posterior distribution. Rank plots (1D)  
 199 further validate convergence, showing uniformly distributed ranks across chains,  
 200 ensuring unbiased sampling.

## 201 2.3 Posterior Distributions

202 The posterior distributions of the parameters, visualized in `az.plot_posterior`,  
 203 provide key insights into the model:

- 204 • **Cluster Effect:** The posterior mean leans toward positive values ( $\sim 0.5$ ),  
 205 with a 94% highest density interval (HDI) excluding zero. This suggests a  
 206 positive, though not statistically conclusive, impact of cluster membership  
 207 on improvement.
- 208 • **Sex Effect:** The posterior mean is negative ( $\sim -1$ ), with the 94% HDI  
 209 also excluding zero. This implies that one sex (e.g., males or females,  
 210 depending on coding) may exhibit lower outcomes on average.
- 211 • **Age Effect:** The posterior distribution centers around zero, with wide  
 212 credible intervals overlapping zero, indicating no significant effect of age  
 213 on improvement.

214 While the credible intervals for "Cluster Effect" and "Sex Effect" suggest slight  
 215 trends, the overlapping intervals emphasize uncertainty and lack of conclusive  
 216 statistical significance.

## 2.4 Parameter Relationships

Pairwise relationships between parameters, assessed through pair plots (1C), reveal weak correlations among predictors. The marginal distributions along the diagonal reinforce earlier findings: "Cluster Effect" and "Sex Effect" exhibit trends in their respective directions, while "Age Effect" appears centered around zero with minimal impact.

## 2.5 Model Uncertainty and Forest Plots

The forest plot (1E) succinctly summarizes the posterior means and credible intervals. Both "Cluster Effect" and "Sex Effect" show 94% HDIs that marginally exclude zero, supporting observed trends but falling short of definitive evidence. In contrast, the "Age Effect" shows a wide interval centered around zero, confirming its lack of significance.

## 2.6 Posterior Predictive Checks

The posterior predictive check (PPC) plot (1A) evaluates model fit. The light blue bands represent predictions from the posterior, while the black line represents observed data. The close alignment between predicted and observed means indicates that the model captures key data trends, though residual variability remains high. This reflects uncertainty in capturing the full variability of the data, consistent with the posterior findings.

## 2.7 Summary of Findings

Based on the posterior distributions and diagnostics:

1. The **Cluster Effect** shows a positive trend, suggesting that individuals in Cluster 1 may exhibit greater improvement compared to Cluster 0.
2. The **Sex Effect** indicates a negative trend, suggesting that males (or females, depending on coding) may experience slightly higher improvement.
3. The **Age Effect** is not significant, implying that age does not play a substantial role in explaining the outcome.

While the trends for "Cluster Effect" and "Sex Effect" are intriguing, they are not statistically conclusive due to overlapping credible intervals and residual variability in the predictions.

**A Posterior Predictive Check (PPC)**

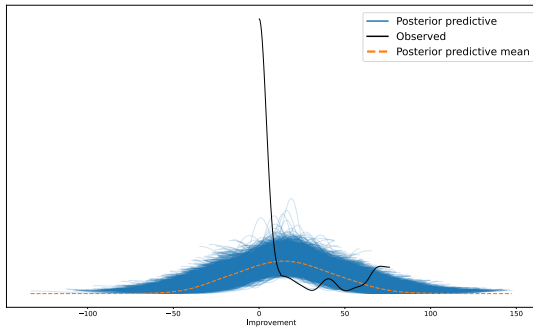

**C Pair Plots**

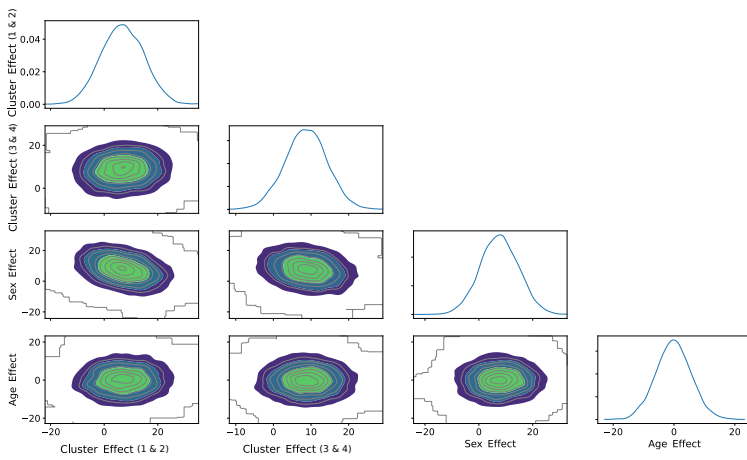

**E Density Overlay**

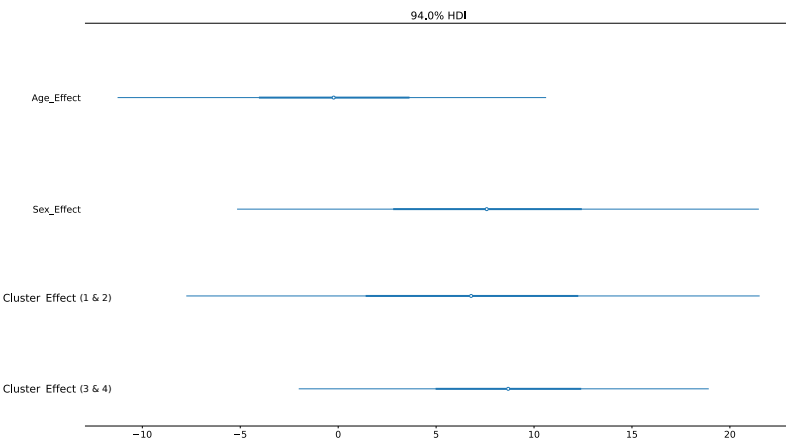

**B Trace plot for parameters Predictive Check (PPC)**

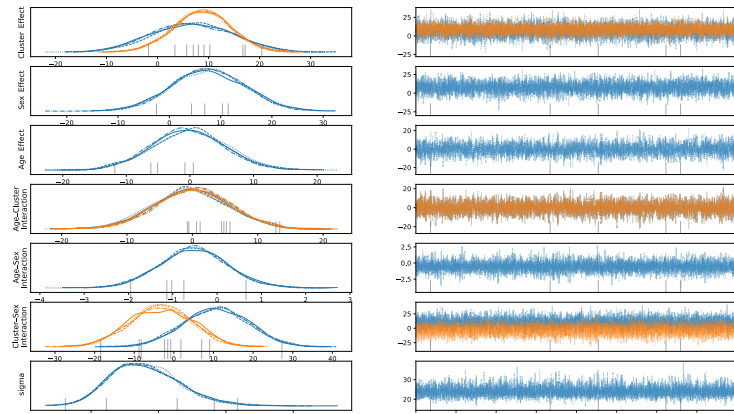

**D Trace plot for parameters**

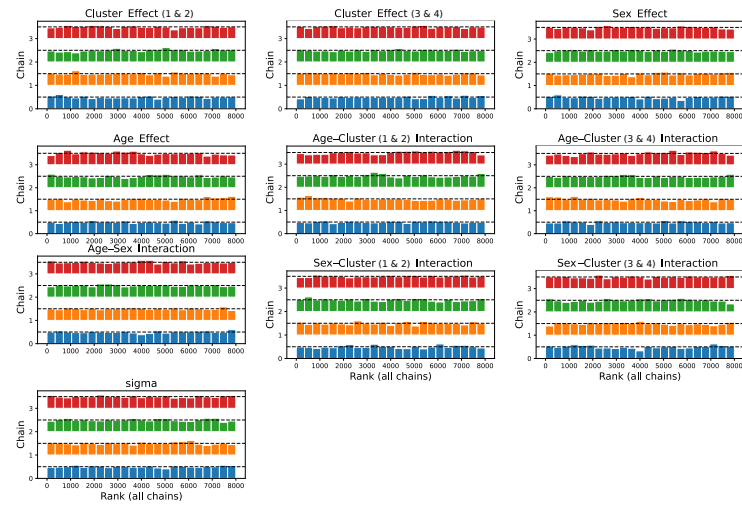

**F Posterior Summary Plots**

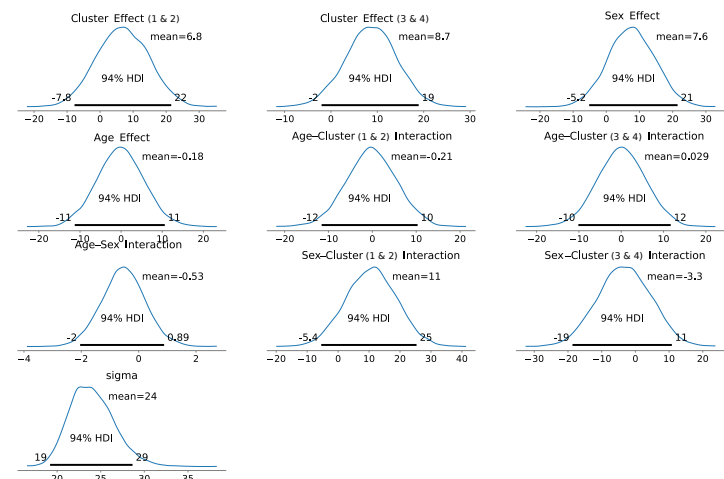



Table 1: Improvement Scores (IS) for 41 patients after simulated treatment targeting the 7 reactions in Cluster R<sub>2</sub>. The table includes patient ID, cluster assignment, sex (1 = male, 0 = female), age, and the calculated IS, which represents the percentage reduction in expected mortality rate. The mean IS across all patients is 18.5%.

| Patient ID | Cluster | Sex (1 = Male) | Age | IS (%) |
|------------|---------|----------------|-----|--------|
| 4          | 3       | 0              | 63  | 0.000  |
| 5          | 3       | 1              | 51  | 37.892 |
| 6          | 3       | 1              | 60  | 0.000  |
| 10         | 4       | 0              | 65  | 40.176 |
| 12         | 3       | 1              | 43  | 0.000  |
| 13         | 4       | 0              | 51  | 0.000  |
| 15         | 3       | 1              | 39  | 72.539 |
| 17         | 2       | 1              | 65  | 0.000  |
| 22         | 2       | 1              | 59  | 0.000  |
| 24         | 2       | 1              | 47  | 13.412 |
| 25         | 2       | 1              | 63  | 76.059 |
| 26         | 2       | 1              | 22  | 68.824 |
| 27         | 2       | 1              | 48  | 66.873 |
| 28         | 2       | 0              | 45  | 0.000  |
| 32         | 1       | 1              | 57  | 0.245  |
| 33         | 2       | 1              | 71  | 0.000  |
| 35         | 2       | 1              | 54  | 65.765 |
| 44         | 2       | 1              | 52  | 0.000  |
| 46         | 2       | 1              | 42  | 7.706  |
| 47         | 2       | 1              | 59  | 4.353  |
| 54         | 2       | 0              | 32  | 0.000  |
| 55         | 1       | 1              | 34  | 56.941 |
| 57         | 3       | 0              | 38  | 0.000  |
| 60         | 4       | 1              | 65  | 0.000  |
| 65         | 3       | 0              | 31  | 70.216 |
| 66         | 3       | 1              | 30  | 2.118  |
| 67         | 3       | 0              | 50  | 43.294 |
| 68         | 4       | 1              | 65  | 2.980  |
| 69         | 3       | 1              | 41  | 18.471 |
| 72         | 3       | 1              | 48  | 15.676 |
| 74         | 3       | 1              | 37  | 6.824  |
| 75         | 4       | 1              | 45  | 0.000  |
| 78         | 4       | 1              | 51  | 0.118  |
| 81         | 3       | 1              | 60  | 0.824  |
| 83         | 3       | 0              | 42  | 0.000  |
| 84         | 3       | 0              | 61  | 2.824  |
| 87         | 3       | 0              | 35  | 0.118  |
| 88         | 3       | 1              | 63  | 2.941  |
| 89         | 3       | 1              | 48  | 0.000  |
| 91         | 3       | 1              | 55  | 24.588 |
| 92         | 3       | 0              | 41  | 0.000  |

Table 2: Posterior summaries of parameter estimates from the Bayesian hierarchical model, along with model comparison metrics (WAIC, LOOIC) and prediction error (RMSE). The results provide posterior means, standard deviations (SD), 94% highest density intervals (HDIs), and convergence diagnostics for key parameters.

| Parameter                                 | Mean   | SD    | HDI 3%  | HDI 97% | MCSE Mean | MCSE SD | ESS (Bulk) | ESS (Tail) | $\hat{R}$ |
|-------------------------------------------|--------|-------|---------|---------|-----------|---------|------------|------------|-----------|
| Cluster Effect ( $P_1$ & $P_2$ )          | 6.836  | 7.859 | -7.756  | 21.520  | 0.106     | 0.079   | 5537.0     | 5618.0     | 1.0       |
| Cluster Effect ( $P_3$ & $P_4$ )          | 8.657  | 5.608 | -2.015  | 18.922  | 0.068     | 0.049   | 6825.0     | 5430.0     | 1.0       |
| Sex Effect                                | 7.617  | 7.081 | -5.163  | 21.479  | 0.102     | 0.075   | 4853.0     | 4963.0     | 1.0       |
| Age Effect                                | -0.179 | 5.788 | -11.265 | 10.617  | 0.108     | 0.076   | 2877.0     | 3600.0     | 1.0       |
| Age-Cluster Interaction ( $P_1$ & $P_2$ ) | -0.215 | 5.788 | -11.552 | 10.320  | 0.108     | 0.076   | 2896.0     | 3778.0     | 1.0       |
| Age-Cluster Interaction ( $P_3$ & $P_4$ ) | 0.029  | 5.786 | -10.122 | 11.700  | 0.107     | 0.076   | 2903.0     | 3583.0     | 1.0       |
| Age-Sex Interaction                       | -0.530 | 0.774 | -2.041  | 0.888   | 0.010     | 0.008   | 6241.0     | 4824.0     | 1.0       |
| Cluster-Sex Interaction ( $P_1$ & $P_2$ ) | 10.644 | 8.289 | -5.449  | 25.341  | 0.113     | 0.083   | 5392.0     | 5545.0     | 1.0       |
| Cluster-Sex Interaction ( $P_3$ & $P_4$ ) | -3.261 | 7.963 | -18.657 | 10.824  | 0.108     | 0.082   | 5464.0     | 4531.0     | 1.0       |
| $\sigma$ (Error SD)                       | 24.015 | 2.574 | 19.194  | 28.648  | 0.032     | 0.023   | 6500.0     | 5448.0     | 1.0       |
| <b>WAIC</b>                               |        |       |         |         | 385.56    |         |            |            |           |
| <b>LOOIC</b>                              |        |       |         |         | 385.56    |         |            |            |           |
| <b>RMSE</b>                               |        |       |         |         | 33.10     |         |            |            |           |

Figure 1: Summary of Bayesian Hierarchical Model Diagnostics and Results: This figure provides a comprehensive summary of diagnostic checks and parameter estimates derived from the Bayesian hierarchical model using MCMC sampling. This figure combines diagnostic and summary visualizations to validate model convergence, assess parameter significance, and highlight key findings. (a) Posterior Predictive Check (PPC): This plot compares the observed data (black line) with posterior predictive samples (light blue bands). The close alignment of the predicted mean with the observed data indicates that the model adequately captures overall trends, although the wide predictive bands highlight residual uncertainty. (b) Trace Plots for PPC: Each row displays the trace and density plots for a model parameter (e.g., "Cluster Effect," "Sex Effect," "Age Effect"). The left panels show the smoothed posterior density estimates for the parameters, while the right panels track parameter values over MCMC iterations. Stable chains without trends or autocorrelation confirm convergence to the posterior distribution. (c) Pair Plot: This plot explores pairwise relationships between key model parameters ("Cluster Effect," "Sex Effect," and "Age Effect"). The off-diagonal 2D kernel density estimates show weak correlations, while the marginal distributions (diagonal) reinforce the distinct roles of each parameter. (d) Trace plots for parameters: These plots visualize the uniformity of rank distributions across chains for all parameters. The evenly distributed color bands indicate no sampling bias and further validate MCMC convergence. (e) Density Overlay: A succinct summary of parameter estimates, including 94% HDIs. The "Cluster Effect" and "Sex Effect" show intervals that suggest potential trends, while the "Age Effect" has wide intervals centered around zero, indicating a negligible impact. (f) Posterior Summary Plots: This plot shows the posterior distributions of key model parameters, including their means and 94% highest density intervals (HDIs). Parameters such as "Cluster Effect" and "Sex Effect" exhibit distributions leaning away from zero, while "Age Effect" centers around zero, suggesting a lack of significance.

### 3 Conclusions

The analysis of improvement scores using Bayesian hierarchical modeling and MCMC sampling provides the following conclusions:

1. No statistically significant effects were detected for **Cluster**, **Sex**, **Age**, or any combined effects (e.g., Sex+Age, Sex+Cluster, Age+Cluster). This suggests that these predictors do not strongly influence the observed outcomes in the current dataset.
2. **Trends were observed:**
  - Individuals in **Cluster 1** tend to show slightly higher improvement compared to Cluster 0.
  - **Males** may exhibit marginally greater improvement.

These trends, while not statistically significant, warrant further investigation in larger datasets or with refined modeling approaches.

260 3. The **Age Effect** was found to be negligible, suggesting that age does not  
261 substantially contribute to outcome variability.

### 262 3.1 Recommendations for Future Work

263 The lack of significant effects underscores the need for further research:

- 264 • Increasing the sample size could reduce credible interval widths and pro-  
265 vide more robust conclusions regarding predictor effects.
- 266 • Incorporating additional predictors or interaction terms (e.g., non-linear  
267 relationships) may help capture residual variability in the data.
- 268 • Targeted analysis of **Cluster** and **Sex**, given their observed trends, could  
269 uncover meaningful differences with stronger evidence.

270 In conclusion, while the current analysis does not provide strong evidence  
271 for significant predictor effects, the observed trends provide promising directions  
272 for future investigation.

## 273 References

- 274 [1] A. Gelman et al. *Bayesian Data Analysis*. CRC Press, 2013.
- 275 [2] S. Brooks and A. Gelman. “General Methods for Monitoring Convergence of  
276 Iterative Simulations”. In: *Journal of Computational and Graphical Statis-*  
277 *tics* 7.4 (1998), pp. 434–455.
- 278 [3] A. Gelman, J. Hwang, and A. Vehtari. “Understanding predictive informa-  
279 tion criteria for Bayesian models”. In: *Statistics and Computing* 24 (2014),  
280 pp. 997–1016.
- 281 [4] A. Vehtari, A. Gelman, and J. Gabry. “Practical Bayesian model evalu-  
282 ation using leave-one-out cross-validation and WAIC”. In: *Statistics and*  
283 *Computing* 27 (2017), pp. 1413–1432.
- 284 [5] H. H. Henriksen et al. “Metabolic systems analysis identifies a novel mech-  
285 anism contributing to shock in patients with endotheliopathy of trauma  
286 (EoT) involving thromboxane A2 and LTC4”. In: *Matrix Biology Plus* 15  
287 (2022), p. 100115.
