# Supplementary material for: Integrating Machine Learning with Metabolic Models for Precision Trauma Care: Personalized ENDOTYPE Stratification and Metabolic Target Identification
Source: Research Square preprint supplement (doi:10.21203/rs.3.rs-6258357/v1), 2025-03-27
Supplement: Supplementary file 3 [file 9911ef546f649dc5236662ae.xlsx]

## Sheet: Sheet1
Reaction Index	Reaction ID	Reaction Name	Pathway	EC number	GPR	lb	ub	Confidence Scores	Notes	References
8	24,25DHVITD2t	24,25-Dihydroxyvitamin D2 transport from cytoplasm	Transport, Extracellular			0	0	2	is found in blood --&gt; subsequently has to be transported but how? based on Vitamins, G.F.M. Ball,2004, Blackwell publishing, 1st ed (book) pg.193 IT	Ball, G.F.M#TITLE:Vitamins: Their Role in the Human Body#YEAR:2004#
9	24,25DHVITD2tm	24,25-Dihydroxyvitamin D2 transport from mitochondria	Transport, Mitochondrial			0	0	2	is found in blood --&gt; subsequently has to be transported but how? based on Vitamins, G.F.M. Ball,2004, Blackwell publishing, 1st ed (book) pg.193 IT	Ball, G.F.M#TITLE:Vitamins: Their Role in the Human Body#YEAR:2004#
10	24,25DHVITD3t	24,25-Dihydroxyvitamin D3 transport from cytoplasm	Transport, Extracellular			0	0	2	is found in blood --&gt; subsequently has to be transported but how? based on Vitamins, G.F.M. Ball,2004, Blackwell publishing, 1st ed (book) pg.193 IT	Ball, G.F.M#TITLE:Vitamins: Their Role in the Human Body#YEAR:2004#
11	24,25DHVITD3tm	24,25-Dihydroxyvitamin D3 transport from mitochondria	Transport, Mitochondrial			0	0	2	is found in blood --&gt; subsequently has to be transported but how? based on Vitamins, G.F.M. Ball,2004, Blackwell publishing, 1st ed (book) pg.193 IT	Ball, G.F.M#TITLE:Vitamins: Their Role in the Human Body#YEAR:2004#
12	24,25VITD2Hm	24R-Vitamin D-25-hydroxylase (D2)	Vitamin D		( 1591.1 )	0	0	4	based on Vitamins, G.F.M. Ball,2004, Blackwell publishing, 1st ed (book) pg.196 IT	Ball, G.F.M#TITLE:Vitamins: Their Role in the Human Body#YEAR:2004#;Kusudo T, Sakaki T, Abe D, Fujishima T, Kittaka A, Takayama H, Hatakeyama S, Ohta M, Inouye K.#TITLE:Metabolism of A-ring diastereomers of 1alpha,25-dihydroxyvitamin D3 by CYP24A1. #JOURNAL:Biochem Biophys Res Commun.#YEAR:2004#PUBMED:15358094#;Labuda M, Lemieux N, Tihy F, Prinster C, Glorieux FH.#TITLE:Human 25-hydroxyvitamin D …
13	24,25VITD3Hm	24R-Vitamin D-25-hydroxylase (D3)	Vitamin D		( 1591.1 )	0	0	4	based on Vitamins, G.F.M. Ball,2004, Blackwell publishing, 1st ed (book) pg.196 IT	Ball, G.F.M#TITLE:Vitamins: Their Role in the Human Body#YEAR:2004#;Kusudo T, Sakaki T, Abe D, Fujishima T, Kittaka A, Takayama H, Hatakeyama S, Ohta M, Inouye K.#TITLE:Metabolism of A-ring diastereomers of 1alpha,25-dihydroxyvitamin D3 by CYP24A1. #JOURNAL:Biochem Biophys Res Commun.#YEAR:2004#PUBMED:15358094#;Labuda M, Lemieux N, Tihy F, Prinster C, Glorieux FH.#TITLE:Human 25-hydroxyvitamin D …
14	25HVITD2tin	25-hydroxyvitamin D2 transport in cytoplasm	Transport, Extracellular			0	0	2	is found in blood --&gt; subsequently has to be transported but how? based on Vitamins, G.F.M. Ball,2004, Blackwell publishing, 1st ed (book) pg.193 IT	Ball, G.F.M#TITLE:Vitamins: Their Role in the Human Body#YEAR:2004#
15	25HVITD2tin_m	25-hydroxyvitamin D2 transport in mitochondria	Transport, Mitochondrial			0	0	2	is found in blood --&gt; subsequently has to be transported but how? based on Vitamins, G.F.M. Ball,2004, Blackwell publishing, 1st ed (book) pg.193 IT	Ball, G.F.M#TITLE:Vitamins: Their Role in the Human Body#YEAR:2004#
21	2HCO3_NAt	bicarbonate transport (Na/HCO3 1:2 cotransport)	Transport, Extracellular		( 57835.3 ) or ( 8671.1 ) or ( 57835.2 ) or ( 57835.1 ) or ( 57835.4 )	0	0	4	MM	Romero MF, Fulton CM, Boron WF.#TITLE:The SLC4 family of HCO 3 - transporters.#YEAR:2004#PUBMED:14722772#
40	3HCO3_NAt	bicarbonate transport (Na/HCO3 1:3 cotransport)	Transport, Extracellular			0	0	4	MM	Romero MF, Fulton CM, Boron WF.#TITLE:The SLC4 family of HCO 3 - transporters.#YEAR:2004#PUBMED:14722772#
68	7DHCHSTEROLtr	cholesterol precursor intracellular transport	Transport, Endoplasmic Reticular			0	0	2	specific mechanism not known, proton dependence for trans-mit transport has been suggested, however directionality and stoichiometry has not yet been elucidated. see PMID: 12770731 and others NJ
92	ACALDtm	acetaldehyde mitochondrial diffusion	Transport, Mitochondrial			0	0	2	NCD	Lieber CS#TITLE:Ethanol metabolism, cirrhosis and alcoholism#JOURNAL:Clin Chim Acta#YEAR:1997#PUBMED:9028626#
144	ACt2m	acetate mitochondrial transport via proton symport	Transport, Mitochondrial			0	0	2	NCD	Casal M, Paiva S, Andrade RP, Gancedo C, Leao C.#TITLE:The lactate-proton symport of Saccharomyces cerevisiae is encoded by JEN1.#JOURNAL:J Bacteriol#YEAR:1999#PUBMED:10198029#;Wolfe AJ.#TITLE:The acetate switch#JOURNAL:Microbiol Mol Biol Rev#YEAR:2005#PUBMED:15755952#
146	ADA	Adenosine deaminase	Purine Catabolism	3.5.4.4	( 100.1 )	0	0	4	Added EC- JLR	Gonzalez-Gronow M, Hershfield MS, Arredondo-Vega FX, Pizzo SV.#TITLE:Cell surface adenosine deaminase binds and stimulates plasminogen activation on 1-LN human prostate cancer cells.#JOURNAL:J Biol Chem#YEAR:2004#PUBMED:15016824#;Iwaki-Egawa S, Watanabe Y.#TITLE:Characterization and purification of adenosine deaminase 1 from human and chicken liver.#JOURNAL:Comp Biochem Physiol B Biochem Mol Biol…
147	ADAe	Adenosine deaminase, extracellular	Nucleotides	3.5.4.4	( 100.1 )	0	0	4	adenosine deaminase has been found on cell surface in human (Gonzales-Gronow et al, JBC, 2004,279,20993-20998). IT	Gonzalez-Gronow M, Hershfield MS, Arredondo-Vega FX, Pizzo SV.#TITLE:Cell surface adenosine deaminase binds and stimulates plasminogen activation on 1-LN human prostate cancer cells.#JOURNAL:J Biol Chem#YEAR:2004#PUBMED:15016824#;Iwaki-Egawa S, Watanabe Y.#TITLE:Characterization and purification of adenosine deaminase 1 from human and chicken liver.#JOURNAL:Comp Biochem Physiol B Biochem Mol Biol…
178	AGTim	alanine-glyoxylate transaminase (irreversible), mitochondrial	Alanine and Aspartate Metabolism	2.6.1.44	( 64902.1 ) or ( 64850.1 )	0	0	4	NCD	Holmes RP, Assimos DG#TITLE:Glyoxylate synthesis, and its modulation and influence on oxalate synthesis#JOURNAL:J Urol#YEAR:1998#PUBMED:9783918#;Baker PR, Cramer SD, Kennedy M, Assimos DG, Holmes RP.#TITLE:Glycolate and glyoxylate metabolism in HepG2 cells.#YEAR:2004#PUBMED:15240345#;Poore RE, Hurst CH, Assimos DG, Holmes RP#TITLE:Pathways of hepatic oxalate synthesis and their regulation#JOURNAL…
190	ALADGLYexR	D-alanine/glycine reversible exchange	Transport, Extracellular		( 56301.1 ) and ( 6520.1 )	0	0	2	SAB many other exchanges possible	Verrey F, Closs EI, Wagner CA, Palacin M, Endou H, Kanai Y#TITLE:CATs and HATs: the SLC7 family of amino acid transporters#JOURNAL:Pflugers Arch#YEAR:2004#PUBMED:14770310#;Fukasawa Y, Segawa H, Kim JY, Chairoungdua A, Kim DK, Matsuo H, Cha SH, Endou H, Kanai Y#TITLE:Identification and characterization of a Na(+)-independent neutral amino acid transporter that associates with the 4F2 heavy chain a…
206	ALDD2xm	aldehyde dehydrogenase (acetylaldehyde, NAD), mitochondrial	Glycolysis/Gluconeogenesis	1.2.1.3	( 219.1 ) or ( 217.1 )	0	0	0	NCD
241	ARTFR42	R group artificial flux	R Group Synthesis			0	0	0	Carbon stoichiometry normalized wrt C16:0 The concomitant oxidation of fadh2 is to account for the normalization to a saturated fatty acid (later in the mitochondria, the full beta oxidation cycle will occur, and the additional round of fad reduction will be balanced to account for the respective degree of desaturation). For example a 9,15 fatty acid would have 2fadh2(m) -&gt; 2fad(m). The concom…
242	ARTFR44	R group artificial flux	R Group Synthesis			0	0	0	Carbon stoichiometry normalized wrt C16:0 The concomitant oxidation of fadh2 is to account for the normalization to a saturated fatty acid (later in the mitochondria, the full beta oxidation cycle will occur, and the additional round of fad reduction will be balanced to account for the respective degree of desaturation). For example a 9,15 fatty acid would have 2fadh2(m) -&gt; 2fad(m). The concom…
243	ARTFR46	R group artificial flux	R Group Synthesis			0	0	0	Carbon stoichiometry normalized wrt C16:0 The concomitant oxidation of fadh2 is to account for the normalization to a saturated fatty acid (later in the mitochondria, the full beta oxidation cycle will occur, and the additional round of fad reduction will be balanced to account for the respective degree of desaturation). For example a 9,15 fatty acid would have 2fadh2(m) -&gt; 2fad(m). The concom…
252	ASPCTr	aspartate carbamoyltransferase (reversible)	Pyrimidine Biosynthesis	2.1.3.2	( 790.1 )	0	0	4	LOCUS:_790#TRANSCRIPT:1#ABBREVIATION:CAD1#ECNUMBERS:6.3.5.5,2.1.3.2,3.5.2.3#	Iwahana H, Fujimura M, Ii S, Kondo M, Moritani M, Takahashi Y, Yamaoka T, Yoshimoto K, Itakura M.#TITLE:Molecular cloning of a human cDNA encoding a trifunctional enzyme of carbamoyl-phosphate synthetase-aspartate transcarbamoylase-dihydroorotase in de Novo pyrimidine synthesis. #JOURNAL:Biochem Biophys Res Commun.#YEAR:1996#PUBMED:8619816#;Chen KC, Vannais DB, Jones C, Patterson D, Davidson JN.#…
299	BILDGLCURtr	glucuronidated compound transport	Transport, Endoplasmic Reticular			0	0	2	unknown mechanism, however glucuronidated metabolites need to get out of the cell NJ
303	BMTer_L	B mannosyltransferase, endoplasmic reticulum	Glycosylphosphatidylinositol (GPI)-anchor biosynthesis		( 9488.1 )	0	0	4	NCD	Varki, Cummings, Esko, Freeze, Hart, Marth#TITLE:Essentials of Glycobiology#YEAR:1999#;Takahashi M, Inoue N, Ohishi K, Maeda Y, Nakamura N, Endo Y, Fujita T, Takeda J, Kinoshita T#TITLE:PIG-B, a membrane protein of the endoplasmic reticulum with a large lumenal domain, is involved in transferring the third mannose of the GPI anchor#JOURNAL:EMBO J#YEAR:1996#PUBMED:8861954#
336	C3STDH1r	C-3 sterol dehydrogenase (4-methylzymosterol)	Cholesterol Metabolism	5.3.3.1	( 50814.1 )	0	0	4	NCD ER version NJ	Marijanovic Z, Laubner D, Moller G, Gege C, Husenn B, Adamski J, Breitling R#TITLE:Closing the gap: Identification of human 3-ketosteroid reductase, the last unknown enzyme of mammalian cholesterol biosynthesis#JOURNAL:Molecular Endocrinology#YEAR:2005#
374	CHOLt4	choline, sodium cotransport	Transport, Extracellular		( 60482.1 )	0	0	4	NCD	Okuda T, Haga T#TITLE:High-affinity choline transporter#JOURNAL:Neurochem Res#YEAR:2003#PUBMED:12675135#;Okuda T, Haga T.#TITLE:Functional characterization of the human high-affinity choline transporter#JOURNAL:FEBS Lett#YEAR:2000#PUBMED:11068039#;Apparsundaram S, Ferguson SM, George AL Jr, Blakely RD#TITLE:Molecular cloning of a human, hemicholinium-3-sensitive choline transporter#JOURNAL:Bioche…
384	CITtam	citrate transport, mitochondrial	Transport, Mitochondrial		( 6576.1 )	0	0	4	antiport with malate IF	Palmieri, F.#TITLE: The mitochondrial transporter family (SLC25): physiological and pathological implications.#JOURNAL: Pflugers Archive#YEAR:2004#PUBMED:14598172#
400	CO2tm	CO2 transport (diffusion), mitochondrial	Transport, Mitochondrial			0	0	4	IF	Balboni E, Lehninger AL.#TITLE:Entry and exit pathways of CO2 in rat liver mitochondria respiring in a bicarbonate buffer system.#JOURNAL:J Biol Chem#YEAR:1968#PUBMED:3081508#
461	CYTK12	cytidylate kinase (dCMP,dCTP)	Nucleotides	2.7.4.14	( 51727.1 )	0	0	4	LOCUS:_51727#TRANSCRIPT:1#ABBREVIATION:UMP-CMPK#ECNUMBERS:2.7.4.14#	Van Rompay AR, Johansson M, Karlsson A.#TITLE:Phosphorylation of deoxycytidine analog monophosphates by UMP-CMP kinase: molecular characterization of the human enzyme. #JOURNAL:Mol Pharmacol. #YEAR:1999#PUBMED:10462544#;Liou JY, Dutschman GE, Lam W, Jiang Z, Cheng YC.#TITLE:Characterization of human UMP/CMP kinase and its phosphorylation of D- and L-form deoxycytidine analogue monophosphates.#JOU…
467	CYTK9	cytidylate kinase (CMP,dCTP)	Nucleotides	2.7.4.14	( 51727.1 )	0	0	4	LOCUS:_51727#TRANSCRIPT:1#ABBREVIATION:UMP-CMPK#ECNUMBERS:2.7.4.14#	Van Rompay AR, Johansson M, Karlsson A.#TITLE:Phosphorylation of deoxycytidine analog monophosphates by UMP-CMP kinase: molecular characterization of the human enzyme. #JOURNAL:Mol Pharmacol. #YEAR:1999#PUBMED:10462544#;Liou JY, Dutschman GE, Lam W, Jiang Z, Cheng YC.#TITLE:Characterization of human UMP/CMP kinase and its phosphorylation of D- and L-form deoxycytidine analogue monophosphates.#JOU…
468	DADA	Deoxyadenosine deaminase	Nucleotides		( 100.1 )	0	0	4	JLR	Gonzalez-Gronow M, Hershfield MS, Arredondo-Vega FX, Pizzo SV.#TITLE:Cell surface adenosine deaminase binds and stimulates plasminogen activation on 1-LN human prostate cancer cells.#JOURNAL:J Biol Chem#YEAR:2004#PUBMED:15016824#;Iwaki-Egawa S, Watanabe Y.#TITLE:Characterization and purification of adenosine deaminase 1 from human and chicken liver.#JOURNAL:Comp Biochem Physiol B Biochem Mol Biol…
469	DADAe	Deoxyadenosine deaminase, extracellular	Nucleotides		( 100.1 )	0	0	4	adenosine deaminase has been found on cell surface in human (Gonzales-Gronow et al, JBC, 2004,279,20993-20998). IT	Gonzalez-Gronow M, Hershfield MS, Arredondo-Vega FX, Pizzo SV.#TITLE:Cell surface adenosine deaminase binds and stimulates plasminogen activation on 1-LN human prostate cancer cells.#JOURNAL:J Biol Chem#YEAR:2004#PUBMED:15016824#;Iwaki-Egawa S, Watanabe Y.#TITLE:Characterization and purification of adenosine deaminase 1 from human and chicken liver.#JOURNAL:Comp Biochem Physiol B Biochem Mol Biol…
481	DCSPTN1COAtx	fatty acid intracellular transport	Transport, Peroxisomal			0	0	2	interaction between peroxisomes and ER (some enzymes on the outer membrane) NJ	Sprecher H#TITLE:An update on the pathways of polyunsaturated fatty acid metabolism#JOURNAL:Curr Opn in Clinical Nutrition and Metabolic Care#YEAR:1999#
494	DESAT18_3	stearoyl-CoA desaturase (n-C18:0CoA -> n-C18:1CoA)	Fatty acid elongation	1.14.19.1	( 6319.1 )	0	0	4	for homo sapiens, noted to actually be NADH-cyt b5, using NADH at present NJ	Voet D, Voet JG#TITLE:Biochemistry#YEAR:1995#;Murray RK, Granner DK, Mayes PA, Rodwell VW#TITLE:Harper&apos;s Biochemistry#YEAR:1999#;Horrobin DF#TITLE:Omega-6 Essential Fatty Acids#YEAR:1990#;Leonard AE, Bobik EG, Dorado J, Kroeger PE, Chuang LT, Thurmond JM, Parker-Barnes JM, Das T, Huang YS, Mukerji P#TITLE:Cloning of a human cDNA encoding a novel enzyme involved in the elongation of long-chai…
511	DHCR243r	24-dehydrocholesterol reductase [Precursor]	Cholesterol Metabolism		( 1718.1 )	0	0	4	lanosterol -&gt; cholesterol pathway FAD known to be cofactor, other details missing NJ	Marijanovic Z, Laubner D, Moller G, Gege C, Husenn B, Adamski J, Breitling R#TITLE:Closing the gap: Identification of human 3-ketosteroid reductase, the last unknown enzyme of mammalian cholesterol biosynthesis#JOURNAL:Molecular Endocrinology#YEAR:2005#
512	DHCR71r	7-dehydrocholesterol reductase	Cholesterol Metabolism	1.3.1.21	( 1717.1 )	0	0	4	lanosterol -&gt; cholesterol pathway see paper refs Moebius et al PNAS 95:1899-1902 - check/re-check lit for more specific details (NADPH known to be cofactor - also NADH?, possibly rev?) NJ	Marijanovic Z, Laubner D, Moller G, Gege C, Husenn B, Adamski J, Breitling R#TITLE:Closing the gap: Identification of human 3-ketosteroid reductase, the last unknown enzyme of mammalian cholesterol biosynthesis#JOURNAL:Molecular Endocrinology#YEAR:2005#;Moebius FF, Fitzky BU, Lee, JN, Paik YK, Glossmann H#TITLE:Molecular cloning and expression of the human delta-7-sterol reductase#JOURNAL:PNAS#YE…
520	DHORD9	dihydoorotic acid dehydrogenase (quinone10)	Pyrimidine Biosynthesis		( 1723.1 )	0	0	4	_06-15-05 - EC 1.3.3.1 IT based on Bader et al, 1998, Prot. Expr. Purif,., 13,414-422 (I guess it is ubiquinone but i am not sure ) (needs FMN as cofactor) v(enzyme is located in inner-membrane of mitochondria, reaction take place in cytosol (Fig. 8 Rawls et al PMID: 10727948 )	Bader B, Knecht W, Fries M, Loffler M.#TITLE: Expression, purification, and characterization of histidine-tagged rat and human flavoenzyme dihydroorotate dehydrogenase.#JOURNAL:Protein Expr Purif.#YEAR:1998#PUBMED:9693067#;Loffler M, Jockel J, Schuster G, Becker C.#TITLE:Dihydroorotat-ubiquinone oxidoreductase links mitochondria in the biosynthesis of pyrimidine nucleotides.#JOURNAL:Mol Cell Bioc…
521	DHORTS	dihydroorotase	Pyrimidine Biosynthesis	3.5.2.3	( 790.1 )	0	0	4	LOCUS:_790#TRANSCRIPT:1#ABBREVIATION:CAD1#ECNUMBERS:6.3.5.5,2.1.3.2,3.5.2.3#	Iwahana H, Fujimura M, Ii S, Kondo M, Moritani M, Takahashi Y, Yamaoka T, Yoshimoto K, Itakura M.#TITLE:Molecular cloning of a human cDNA encoding a trifunctional enzyme of carbamoyl-phosphate synthetase-aspartate transcarbamoylase-dihydroorotase in de Novo pyrimidine synthesis. #JOURNAL:Biochem Biophys Res Commun.#YEAR:1996#PUBMED:8619816#;Chen KC, Vannais DB, Jones C, Patterson D, Davidson JN.#…
537	DM_dctp(m)	dCTP demand	Miscellaneous			0	0	0	none
538	DM_dgtp(m)	DM dgtp(m)	Miscellaneous			0	0	0	IT
539	DM_dttp(m)	dTTP demand	Miscellaneous			0	0	0	none
540	DM_gpi_sig(er)	DM gpi sig(er)	Miscellaneous			0	0	0	NCD
541	DM_kdn_c	DM kdn(c)	Miscellaneous			0	0	0	NCD
542	DM_melanin_c	DM melanin(c)	Miscellaneous			0	0	0	SAB demand for melanin in cytosol because there is no specific melanosome compartment
543	DM_sprm_c	DM sprm(c)	Miscellaneous			0	0	0	SAB potential &quot;biomass&quot; component--may associate with DNA
640	EX_10fthf7glu(e)	10-formyltetrahydrofolate-[Glu](7) exchange	Miscellaneous			0	0	0	none
641	EX_10fthf(e)	10-Formyltetrahydrofolate exchange	Miscellaneous			0	0	0	none
642	EX_1glyc_hs(e)	1 acyl phosphoglycerol exchange	Miscellaneous			0	0	0	none
643	EX_1mncam(e)	1-Methylnicotinamide exchange	Miscellaneous			0	0	0	none
644	EX_2425dhvitd2(e)	24R,25-Dihyoxyvitamin D2 exchange	Miscellaneous			0	0	0	none
645	EX_2425dhvitd3(e)	24R,25-Dihydroxyvitamin D3 exchange	Miscellaneous			0	0	0	none
646	EX_25hvitd2(e)	25-Hydroxyvitamin D2 exchange	Miscellaneous			0	0	0	none
647	EX_2hb(e)	2-Hydroxybutyrate exchange	Miscellaneous			0	0	0	none
648	EX_2mcit(e)	2-Methylcitrate exchange	Miscellaneous			0	0	0	none
649	EX_34dhoxpeg(e)	3,4-Dihydroxyphenylethyleneglycol exchange	Miscellaneous			0	0	0	none
650	EX_34dhphe(e)	3,4-Dihydroxy-L-phenylalanine exchange	Miscellaneous			0	0	0	none
651	EX_35cgmp(e)	3',5'-Cyclic GMP exchange	Miscellaneous			0	0	0	none
652	EX_3aib_D(e)	D-3-Amino-isobutanoate exchange	Miscellaneous			0	0	0	none
653	EX_3aib(e)	L-3-Amino-isobutanoate exchange	Miscellaneous			0	0	0	none
654	EX_3mlda(e)	3-Methylimidazoleacetic acid exchange	Miscellaneous			0	0	0	none
655	EX_4hdebrisoquine(e)	4 hydroxy debrisoquine exchange	Miscellaneous			0	0	0	none
656	EX_4hphac(e)	4-Hydroxyphenylacetate exchange	Miscellaneous			0	0	0	none
657	EX_4nph(e)	4-Nitrophenol exchange	Miscellaneous			0	0	0	none
658	EX_4nphsf(e)	4-Nitrophenyl sulfate exchange	Miscellaneous			0	0	0	none
659	EX_5adtststerone(e)	5alpha-Dihydrotestosterone exchange	Miscellaneous			0	0	0	none
660	EX_5adtststeroneglc(e)	5alpha-Dihydrotestosterone glucuronide exchange	Miscellaneous			0	0	0	none
661	EX_5adtststerones(e)	5alpha-Dihydrotestosterone sulfate exchange	Miscellaneous			0	0	0	none
662	EX_5fthf(e)	5-Formyltetrahydrofolate exchange	Miscellaneous			0	0	0	none
663	EX_5htrp(e)	5-Hydroxy-L-tryptophan exchange	Miscellaneous			0	0	0	none
664	EX_7dhf(e)	heptaglutamyl folate (DHF) exchange	Miscellaneous			0	0	0	none
665	EX_7thf(e)	heptaglutamyl folate (THF) exchange	Miscellaneous			0	0	0	none
667	EX_ac(e)	Acetate exchange	Miscellaneous			0	0	0	none
668	EX_acac(e)	Acetoacetate exchange	Miscellaneous			0	0	0	none
669	EX_acetone(e)	Acetone exchange	Miscellaneous			0	0	0	none
670	EX_ach(e)	Acetylcholine exchange	Miscellaneous			0	0	0	none
671	EX_acn13acngalgbside_hs(e)	sialyl (1,3) sialyl (2,6) galactosylgloboside (homo sapiens) exchange	Miscellaneous			0	0	0	none
672	EX_acn23acngalgbside_hs(e)	sialyl (2,3) sialyl (2,6) galactosylgloboside (homo sapiens) exchange	Miscellaneous			0	0	0	none
673	EX_acnacngal14acglcgalgluside_hs(e)	3',8'-LD1 exchange	Miscellaneous			0	0	0	none
674	EX_acngalacglcgal14acglcgalgluside_hs(e)	VI3NeuAc-nLc6Cer exchange	Miscellaneous			0	0	0	none
677	EX_adp	adp exchange	Miscellaneous			0	0	0	TV
679	EX_adrnl(e)	Adrenaline exchange	Miscellaneous			0	0	0	none
680	EX_aflatoxin(e)	aflatoxin B1 exchange	Miscellaneous			0	0	0	none
682	EX_andrstrn(e)	Androsterone exchange	Miscellaneous			0	0	0	none
683	EX_andrstrnglc(e)	androsterone glucuronide exchange	Miscellaneous			0	0	0	none
689	EX_bhb(e)	(R)-3-Hydroxybutanoate transport via H+ symport	Miscellaneous			0	0	0	IT
691	EX_but(e)	Butyrate (n-C4:0) exchange	Miscellaneous			0	0	0	none
692	EX_camp(e)	cAMP exchange	Miscellaneous			0	0	0	none
693	EX_cgly(e)	Cys-Gly exchange	Miscellaneous			0	0	0	none
696	EX_chtn(e)	chitin exchange	Miscellaneous			0	0	0	none
698	EX_coumarin(e)	coumarin exchange	Miscellaneous			0	0	0	none
699	EX_creat(e)	Creatine exchange	Miscellaneous			0	0	0	none
700	EX_crmp_hs(e)	Ceramide 1-phosphate exchange	Miscellaneous			0	0	0	none
702	EX_csn(e)	Cytosine exchange	Miscellaneous			0	0	0	none
703	EX_cyan(e)	Hydrogen cyanide exchange	Miscellaneous			0	0	0	none
705	EX_dad_2(e)	Deoxyadenosine exchange	Miscellaneous			0	0	0	none
707	EX_debrisoquine(e)	debrisoquine exchange	Miscellaneous			0	0	0	none
708	EX_dgchol(e)	Chenodeoxyglycocholate exchange	Miscellaneous			0	0	0	none
709	EX_dhf(e)	7,8-Dihydrofolate exchange	Miscellaneous			0	0	0	none
711	EX_dopa(e)	Dopamine exchange	Miscellaneous			0	0	0	none
712	EX_dopasf(e)	Dopamine 3-O-sulfate exchange	Miscellaneous			0	0	0	none
713	EX_eaflatoxin(e)	8,9 epxoy aflatoxin B1 exchange	Miscellaneous			0	0	0	none
714	EX_ebastine(e)	ebastine exchange	Miscellaneous			0	0	0	none
715	EX_ebastineoh(e)	hydroxylated ebastine exchange	Miscellaneous			0	0	0	none
716	EX_eicostet(e)	eicosatetranoic acid exchange	Miscellaneous			0	0	0	none
717	EX_estroneglc(e)	estrone glucuronide exchange	Miscellaneous			0	0	0	none
718	EX_estrones(e)	Estrone 3-sulfate exchange	Miscellaneous			0	0	0	none
719	EX_etoh(e)	Ethanol exchange	Miscellaneous			0	0	0	none
720	EX_fol(e)	Folate exchange	Miscellaneous			0	0	0	none
721	EX_fuc_L(e)	L-Fucose exchange	Miscellaneous			0	0	0	none
722	EX_gal(e)	D-Galactose exchange	Miscellaneous			0	0	0	none
723	EX_galacglcgalgbside_hs(e)	Gal-GlcNAc-Gal globoside (homo sapiens) exchange	Miscellaneous			0	0	0	none
724	EX_galgalgalthcrm_hs(e)	Gal-Gal-Gal-Gal-Gal-Glc-Cer (homo sapiens) exchange	Miscellaneous			0	0	0	none
725	EX_gam(e)	D-Glucosamine exchange	Miscellaneous			0	0	0	none
726	EX_gbside_hs(e)	globoside (homo sapiens) exchange	Miscellaneous			0	0	0	none
727	EX_gd1b2_hs(e)	GD1beta (homo sapiens) exchange	Miscellaneous			0	0	0	none
728	EX_gd1c_hs(e)	GD1c (homo sapiens) exchange	Miscellaneous			0	0	0	none
732	EX_glyb(e)	Glycine betaine exchange	Miscellaneous			0	0	0	none
733	EX_glyc_S(e)	(S)-Glycerate exchange	Miscellaneous			0	0	0	none
734	EX_glygn2(e)	glycogen, structure 2 (glycogenin-1,6-{7[1,4-Glc], 4[1,4-Glc]}) exchange	Miscellaneous			0	0	0	none
735	EX_glygn5(e)	glycogen, structure 5 (glycogenin-2[1,4-Glc]) exchange	Miscellaneous			0	0	0	none
736	EX_gp1c_hs(e)	GP1c (homo sapiens) exchange	Miscellaneous			0	0	0	none
737	EX_gp1calpha_hs(e)	GP1c alpha (homo sapiens) exchange	Miscellaneous			0	0	0	none
738	EX_gq1b_hs(e)	GQ1b (homo sapiens) exchange	Miscellaneous			0	0	0	none
739	EX_gq1balpha_hs(e)	GQ1balpha (homo sapiens) exchange	Miscellaneous			0	0	0	none
740	EX_gt1a_hs(e)	GT1a (homo sapiens) exchange	Miscellaneous			0	0	0	none
741	EX_gthox(e)	Oxidized glutathione exchange	Miscellaneous			0	0	0	none
742	EX_gtp(e)	GTP exchange	Miscellaneous			0	0	0	none
743	EX_gua(e)	Guanine exchange	Miscellaneous			0	0	0	none
744	EX_ha(e)	hyaluronan exchange	Miscellaneous			0	0	0	none
745	EX_hcoumarin(e)	hydroxy coumarin exchange	Miscellaneous			0	0	0	none
747	EX_hestratriol(e)	4,17 dihydroxy estradiol exchange	Miscellaneous			0	0	0	none
748	EX_hexc(e)	hexacosanoate (n-C26:0) exchange	Miscellaneous			0	0	0	none
750	EX_hista(e)	Histamine exchange	Miscellaneous			0	0	0	none
751	EX_hpdca(e)	heptadecanoate exchange	Miscellaneous			0	0	0	none
754	EX_idp(e)	IDP exchange	Miscellaneous			0	0	0	none
756	EX_imp(e)	IMP exchange	Miscellaneous			0	0	0	none
763	EX_leuktrC4(e)	Leukotriene C4 exchange	Miscellaneous			0	0	0	none
764	EX_lgnc(e)	lignoceric acid exchange	Miscellaneous			0	0	0	none
767	EX_lpchol_hs(e)	lysophosphatidylcholine (homo sapiens) exchange	Miscellaneous			0	0	0	none
769	EX_malt(e)	Maltose exchange	Miscellaneous			0	0	0	none
771	EX_mercplaccys(e)	3-mercaptolactate-cysteine disulfide exchange	Miscellaneous			0	0	0	none
773	EX_n2m2nmasn(e)	N-Acetyl-beta-D-glucosaminyl-1,2-alpha-D-mannosyl-1,3-(N-acetyl-beta-D-glucosaminyl-1,2-alpha-D-mannosyl-1,6)-(N-acetyl-beta-D-glucosaminyl-1,4)-beta-D-mannosyl-1,4-N-acetyl-beta-D-glucosaminyl-R exchange	Miscellaneous			0	0	0	none
775	EX_npthl(e)	Naphthalene exchange	Miscellaneous			0	0	0	none
776	EX_nrpphr(e)	Norepinephrine exchange	Miscellaneous			0	0	0	none
777	EX_nrpphrsf(e)	Sulfate derivative of norepinephrine exchange	Miscellaneous			0	0	0	none
778	EX_nrvnc(e)	nervonic acid exchange	Miscellaneous			0	0	0	none
779	EX_oagd3_hs(e)	9-O-Acetylated GD3 (homo sapiens) exchange	Miscellaneous			0	0	0	none
780	EX_oagt3_hs(e)	9-O-Acetylated GT3 (homo sapiens) exchange	Miscellaneous			0	0	0	none
783	EX_octa(e)	octanoate (n-C8:0) exchange	Miscellaneous			0	0	0	none
784	EX_onpthl(e)	naphthalene epoxide exchange	Miscellaneous			0	0	0	none
786	EX_oxa(e)	Oxalate exchange	Miscellaneous			0	0	0	none
791	EX_pheacgln(e)	alpha-N-Phenylacetyl-L-glutamine exchange	Miscellaneous			0	0	0	none
793	EX_ppa(e)	Propionate exchange	Miscellaneous			0	0	0	none
794	EX_pro_D(e)	D-Proline exchange	Miscellaneous			0	0	0	none
798	EX_prostgf2(e)	Prostaglandin F2alpha exchange	Miscellaneous			0	0	0	none
799	EX_ps_hs(e)	phosphatidylserine (homo sapiens) exchange	Miscellaneous			0	0	0	none
800	EX_ptdca(e)	pentadecanoate exchange	Miscellaneous			0	0	0	none
801	EX_s2l2n2m2masn(e)	de-Fuc form of PA6 exchange	Miscellaneous			0	0	0	none
803	EX_sl_L(e)	L-sulfolactate exchange	Miscellaneous			0	0	0	none
805	EX_sph1p(e)	Sphinganine 1-phosphate exchange	Miscellaneous			0	0	0	none
807	EX_strch1(e)	starch, structure 1 (1,6-{7[1,4-Glc], 4[1,4-Glc]}) exchange	Miscellaneous			0	0	0	none
808	EX_strdnc(e)	stearidonic acid exchange	Miscellaneous			0	0	0	none
810	EX_sucr(e)	Sucrose exchange	Miscellaneous			0	0	0	none
811	EX_tag_hs(e)	triacylglycerol (homo sapiens) exchange	Miscellaneous			0	0	0	none
812	EX_tagat_D(e)	D-Tagatose exchange	Miscellaneous			0	0	0	none
815	EX_tcynt(e)	Thiocyanate exchange	Miscellaneous			0	0	0	none
816	EX_tdchola(e)	taurochenodeoxycholate exchange	Miscellaneous			0	0	0	none
817	EX_tetpent3(e)	tetracosapentaenoic acid, n-3 exchange	Miscellaneous			0	0	0	none
818	EX_tetpent6(e)	tetracosapentaenoic acid, n-6 exchange	Miscellaneous			0	0	0	none
819	EX_tettet6(e)	tetracosatetraenoic acid n-6 exchange	Miscellaneous			0	0	0	none
821	EX_thmmp(e)	Thiamin monophosphate exchange	Miscellaneous			0	0	0	none
824	EX_thym(e)	Thymine exchange	Miscellaneous			0	0	0	none
826	EX_thyox_L(e)	L-Thyroxine exchange	Miscellaneous			0	0	0	none
827	EX_triodthysuf(e)	Triiodothyronine sulfate exchange	Miscellaneous			0	0	0	none
829	EX_tsul(e)	Thiosulfate exchange	Miscellaneous			0	0	0	none
830	EX_ttdca(e)	tetradecanoate (n-C14:0) exchange	Miscellaneous			0	0	0	none
831	EX_txa2(e)	Thromboxane A2 exchange	Miscellaneous			0	0	0	none
832	EX_tymsf(e)	Tyramine O-sulfate exchange	Miscellaneous			0	0	0	none
834	EX_ura(e)	Uracil exchange	Miscellaneous			0	0	0	none
837	EX_utp(e)	UTP exchange	Miscellaneous			0	0	0	none
839	EX_vitd3(e)	Vitamin D3 exchange	Miscellaneous			0	0	0	none
841	EX_xyl_D(e)	D-Xylose exchange	Miscellaneous			0	0	0	none
855	FACOAL226	fatty-acid--CoA ligase	Fatty acid activation	6.2.1.3	( 2180.1 )	0	0	4	NJ	Mashek DG, Bornfeldt KE, Coleman RA, Berger J, Bernlohr DA, Black P, DiRusso CC, Farber SA, Guo W, Hashimoto N, Khodiyar V, Kuypers FA, Maltais LJ, Nebert DW, Renieri A, Schaffer JE, Stahl A, Watkins PA, Vasiliou V, Yamamoto TT.#TITLE:Revised nomenclature for the mammalian long-chain acyl-CoA synthetase gene family.#JOURNAL:J Lipid Res#YEAR:2004#PUBMED:15292367#;Reich, Sel&apos;kov#TITLE:Energy m…
869	FALDH	formaldehyde dehydrogenase	Tyrosine metabolism	1.2.1.1	( 128.1 )	0	0	4	NCD	Engeland K, Hoog JO, Holmquist B, Estonius M, Jornvall H, Vallee BL#TITLE:Mutation of Arg-115 of human class III alcohol dehydrogenase: a binding site required for formaldehyde dehydrogenase activity and fatty acid activation#JOURNAL:Proc Natl Acad Sci U S A#YEAR:1993#PUBMED:8460164#;Uotila L, Koivusalo M#TITLE:Purification and properties of S-formylglutathione hydrolase from human liver#JOURNAL:…
871	FAOXC140	Beta oxidation of long chain fatty acid	Fatty acid oxidation	1.3.99.3	( 35.1 ) or ( 34.1 )	0	0	4	TV Other enzymes: 1.3.3.6, 4.2.1.74, 4.2.1.17, 1.1.1.35, 1.1.1.211	Naito E, Ozasa H, Ikeda Y, Tanaka K.#TITLE:Molecular cloning and nucleotide sequence of complementary DNAs encoding human short chain acyl-coenzyme A dehydrogenase and the study of the molecular basis of human short chain acyl-coenzyme A dehydrogenase deficiency.#JOURNAL:J Clin Invest#YEAR:1985#PUBMED:2565344#
872	FAOXC150m	Beta oxidation of long chain fatty acid (odd chain)	Fatty acid oxidation	1.3.99.3	( 35.1 ) or ( 34.1 )	0	0	4	by extension from even chain lumped FAO - should double-check stoich in future NJ	Naito E, Ozasa H, Ikeda Y, Tanaka K.#TITLE:Molecular cloning and nucleotide sequence of complementary DNAs encoding human short chain acyl-coenzyme A dehydrogenase and the study of the molecular basis of human short chain acyl-coenzyme A dehydrogenase deficiency.#JOURNAL:J Clin Invest#YEAR:1985#PUBMED:2565344#
873	FAOXC160	Beta oxidation of long chain fatty acid	Fatty acid oxidation	1.3.99.3	( 34.1 ) or ( 35.1 )	0	0	4	TV Other enzymes: 1.3.3.6, 4.2.1.74, 4.2.1.17, 1.1.1.35, 1.1.1.211	Kelly DP, Kim JJ, Billadello JJ, Hainline BE, Chu TW, Strauss AW#TITLE:Nucleotide sequence of medium-chain acyl-CoA dehydrogenase mRNA and its expression in enzyme-deficient human tissue.#JOURNAL:Proc Natl Acad Sci U S A.#YEAR:1987#PUBMED:3035565#;Naito E, Ozasa H, Ikeda Y, Tanaka K.#TITLE:Molecular cloning and nucleotide sequence of complementary DNAs encoding human short chain acyl-coenzyme A d…
874	FAOXC16080m	Beta oxidation of long chain fatty acid	Fatty acid oxidation	1.3.99.3	( 35.1 ) or ( 34.1 )	0	0	4	_4 rounds of beta ox c16:0 -&gt; c8:0, 4 step FAO lumped for 2 rounds also includes EC 1.1.1.35, 1.1.1.211, 1.3.3.6, 4.2.1.17, 4.2.1.74 NJ
901	FAOXC2252053m	Beta oxidation of long chain fatty acid	Fatty acid oxidation	1.3.99.3	( 35.1 ) or ( 34.1 )	0	0	4	_1 round beta ox - c22:5,n-3 -&gt; c20:5, n-3 - final &apos;3&apos; in abbreviation indicates omega3 FA 4 step FAO lumped for 2 rounds also includes EC 1.1.1.35, 1.1.1.211, 1.3.3.6, 4.2.1.17, 4.2.1.74 NJ
904	FAOXC226205m	Beta oxidation of long chain fatty acid	Fatty acid oxidation	1.3.99.3	( 35.1 ) or ( 34.1 )	0	0	4	_1 round of beta-oxidation, loses degree of desat, so no fad peroxisomal (very long chain FA) c22:6,n-3 -&gt; c20:5, n-3 4 step FAO lumped also includes EC 1.1.1.35, 1.1.1.211, 1.3.3.6, 4.2.1.17, 4.2.1.74 NJ	Kelly DP, Kim JJ, Billadello JJ, Hainline BE, Chu TW, Strauss AW#TITLE:Nucleotide sequence of medium-chain acyl-CoA dehydrogenase mRNA and its expression in enzyme-deficient human tissue.#JOURNAL:Proc Natl Acad Sci U S A.#YEAR:1987#PUBMED:3035565#;Naito E, Ozasa H, Ikeda Y, Tanaka K.#TITLE:Molecular cloning and nucleotide sequence of complementary DNAs encoding human short chain acyl-coenzyme A d…
913	FAOXC80	Beta oxidation of med/long chain fatty acid	Fatty acid oxidation	1.3.99.3	( 35.1 ) or ( 34.1 )	0	0	4	TDV (9/7/2004) Other enzymes: 1.3.3.6, 4.2.1.74, 4.2.1.17, 1.1.1.35, 1.1.1.211	Kelly DP, Kim JJ, Billadello JJ, Hainline BE, Chu TW, Strauss AW#TITLE:Nucleotide sequence of medium-chain acyl-CoA dehydrogenase mRNA and its expression in enzyme-deficient human tissue.#JOURNAL:Proc Natl Acad Sci U S A.#YEAR:1987#PUBMED:3035565#;Naito E, Ozasa H, Ikeda Y, Tanaka K.#TITLE:Molecular cloning and nucleotide sequence of complementary DNAs encoding human short chain acyl-coenzyme A d…
1031	GALT	galactose-1-phosphate uridylyltransferase	Galactose metabolism	2.7.7.10	( 2592.1 ) or ( 2592.3 ) or ( 2592.2 )	0	0	0	LOCUS:_2592#TRANSCRIPT:1#ABBREVIATION:GALT#ECNUMBERS:2.7.7.12#	Leslie ND, Immerman EB, Flach JE, Florez M, Fridovich-Keil JL, Elsas LJ#TITLE:The human galactose-1-phosphate uridyltransferase gene#JOURNAL:Genomics#YEAR:1992#PUBMED:1427861#
1147	GLXtm	glyoxylate transport, mitochondrial	Transport, Mitochondrial			0	0	1	NCD	Baker PR, Cramer SD, Kennedy M, Assimos DG, Holmes RP.#TITLE:Glycolate and glyoxylate metabolism in HepG2 cells.#YEAR:2004#PUBMED:15240345#
1162	GLYt7(211)r	glycine reversible transport via sodium and chloride symport (2:1:1)	Transport, Extracellular		( 6536.1 ) or ( 6536.2 )	0	0	4	SAB	Chen NH, Reith ME, Quick MW#TITLE:Synaptic uptake and beyond: the sodium- and chloride-dependent neurotransmitter transporter family SLC6#JOURNAL:Pflugers Arch#YEAR:2004#PUBMED:12719981#
1166	GMPS2	GMP synthase	Nucleotides	6.3.5.2	( 8833.1 )	0	0	4	JLR	Nakamura J, Lou L. #TITLE:Biochemical characterization of human GMP synthetase.#JOURNAL: J Biol Chem. #YEAR:1995#PUBMED:7706277#
1194	GUAD	guanine deaminase	Purine Catabolism	3.5.4.3	( 9615.1 )	0	0	4	LOCUS:_9615#TRANSCRIPT:1#ABBREVIATION:GDA#ECNUMBERS:3.5.4.3#	Yuan G, Bin JC, McKay DJ, Snyder FF.#TITLE:Cloning and characterization of human guanine deaminase. Purification and partial amino acid sequence of the mouse protein.#JOURNAL:J Biol Chem.#YEAR:1999#PUBMED:10075721#
1209	H2O2tp	hydrogen peroxide peroxisomal transport via diffusion	Transport, Peroxisomal			0	0	2	NCD	Ohno Y, Gallin JI. #TITLE:Diffusion of extracellular hydrogen peroxide into intracellular compartments of human neutrophils. Studies utilizing the inactivation of myeloperoxidase by hydrogen peroxide and azide.#JOURNAL:J Biol Chem#YEAR:1985#PUBMED:2989289#
1283	HSD17B8r	17-beta-hydroxysteroid dehydrogenase	Steroid Metabolism	1.1.1.62	( 3294.1 )	0	0	4	microsomal NAD as cofactor HSD type 2 recheck/confirm comparmentalization - type 1: cytosol, types 2,3: microsomes NJ	Wu L, Einstein M, Geissler WM, Chan HK, Elliston KO, Andersson S.#TITLE:Expression cloning and characterization of human 17 beta-hydroxysteroid dehydrogenase type 2, a microsomal enzyme possessing 20 alpha-hydroxysteroid dehydrogenase activity.#JOURNAL:J Biol Chem#YEAR:1993#PUBMED:8099587#
1379	LSTO1r	Lathosterol oxidase	Cholesterol Metabolism	1.3.3.2	( 6309.1 )	0	0	4	lanosterol -&gt; cholesterol pathway NJ	Marijanovic Z, Laubner D, Moller G, Gege C, Husenn B, Adamski J, Breitling R#TITLE:Closing the gap: Identification of human 3-ketosteroid reductase, the last unknown enzyme of mammalian cholesterol biosynthesis#JOURNAL:Molecular Endocrinology#YEAR:2005#;Taton M, Husselstein T, Benveniste P, Rahier A#TITLE:Role of highly conserved residues in the reaction catalyzed by recombinant delta-sterol-C5(6…
1403	MALTSULtm	Malate:thiosulfate antiport, mitochondrial	Transport, Mitochondrial		( 1468.1 )	0	0	4	MM	Palmieri, F.#TITLE: The mitochondrial transporter family (SLC25): physiological and pathological implications.#JOURNAL: Pflugers Archive#YEAR:2004#PUBMED:14598172#;Crompton M, Palmieri F, Capano M, Quagliariello E.#TITLE:The transport of sulphate and sulphite in rat liver mitochondria. #YEAR:1974#PUBMED:4441366#
1417	MDHm	malate dehydrogenase, mitochondrial	Citric Acid Cycle	1.1.1.37	( 4191.1 )	0	0	0	IF
1435	MI14P4P	inositol-1,4-bisphosphate 4-phosphatase	Inositol Phosphate Metabolism			0	0	2	NCD	Irvine RF, Moor RM, Pollock WK, Smith PM, Wreggett KA#TITLE:Inositol phosphates: proliferation, metabolism and function#JOURNAL:Philos Trans R Soc Lond B Biol Sci#YEAR:1988#PUBMED:2906139#
1459	MMSAD1m	methylmalonate-semialdehyde dehydrogenase	Valine, Leucine, and Isoleucine Metabolism	1.2.1.27	( 4329.1 )	0	0	4	TV Also converts propanal to propanoyl-CoA	Devlin, TM#TITLE:Textbook of Biochemistry with Clinical Correlations#YEAR:2001#;Kedishvili NY, Popov KM, Rougraff PM, Zhao Y, Crabb DW, Harris RA.#TITLE:CoA-dependent methylmalonate-semialdehyde dehydrogenase, a unique member of the aldehyde dehydrogenase superfamily. cDNA cloning, evolutionary relationships, and tissue distribution. #YEAR:1992#PUBMED:1527093#;Chambliss,K.L. , Gray,R.G. , Rylance…
1472	NABTNOm	N4-Acetylaminobutanal:NAD+ oxidoreductase (m)	Arginine and Proline Metabolism	1.2.1.3	( 217.1 ) or ( 8659.1 ) or ( 219.1 )	0	0	1	NCD SAB m
1543	NDP10ex	nucleoside-diphosphatase (IDP), extracellular	Nucleotides	3.6.1.6	( 124583.1 )	0	0	4	IT	Smith TM, Hicks-Berger CA, Kim S, Kirley TL.#TITLE:Cloning, expression, and characterization of a soluble calcium-activated nucleotidase, a human enzyme belonging to a new family of extracellular nucleotidases.#JOURNAL:Arch Biochem Biophys. #YEAR:2002#PUBMED:12234496#;Murphy DM, Ivanenkov VV, Kirley TL. #TITLE:Bacterial expression and characterization of a novel, soluble, calcium-binding, and cal…
1544	NDP3ex	nucleoside-diphosphatase (GDP), extracellular	Nucleotides	3.6.1.6	( 124583.1 )	0	0	4	EC is 3.6.1.42? NCD	Smith TM, Hicks-Berger CA, Kim S, Kirley TL.#TITLE:Cloning, expression, and characterization of a soluble calcium-activated nucleotidase, a human enzyme belonging to a new family of extracellular nucleotidases.#JOURNAL:Arch Biochem Biophys. #YEAR:2002#PUBMED:12234496#;Murphy DM, Ivanenkov VV, Kirley TL. #TITLE:Bacterial expression and characterization of a novel, soluble, calcium-binding, and cal…
1546	NDP7ex	nucleoside-diphosphatase (UDP), extracellular	Nucleotides	3.6.1.6	( 124583.1 )	0	0	4	LOCUS:_124583#TRANSCRIPT:1#ABBREVIATION:CANT1#	Murphy DM, Ivanenkov VV, Kirley TL. #TITLE:Bacterial expression and characterization of a novel, soluble, calcium-binding, and calcium-activated human nucleotidase. #JOURNAL:Biochemistry#YEAR:2003#PUBMED:12600208#
1549	NDP8ex	nucleoside-diphosphatase (UTP), extracellular	Nucleotides	3.6.1.6	( 124583.1 )	0	0	4	LOCUS:_124583#TRANSCRIPT:1#ABBREVIATION:CANT1#	Smith TM, Hicks-Berger CA, Kim S, Kirley TL.#TITLE:Cloning, expression, and characterization of a soluble calcium-activated nucleotidase, a human enzyme belonging to a new family of extracellular nucleotidases.#JOURNAL:Arch Biochem Biophys. #YEAR:2002#PUBMED:12234496#;Murphy DM, Ivanenkov VV, Kirley TL. #TITLE:Bacterial expression and characterization of a novel, soluble, calcium-binding, and cal…
1602	NTD2e	5'-nucleotidase (UMP), extracellular	Nucleotides	3.1.3.5	( 4907.1 )	0	0	2	Wide specificity for 5&apos;-nucleotides Also see EC 3.1.3.31
1610	NTD9e	5'-nucleotidase (GMP), extracellular	Nucleotides	3.1.3.5	( 4907.1 )	0	0	2	Wide specificity for 5&apos;-nucleotides Also see EC 3.1.3.31
1611	NTP3e	nucleoside-triphosphatase (GTP)	Nucleotides	3.6.1.15	( 124583.1 )	0	0	4	LOCUS:_124583#TRANSCRIPT:1#ABBREVIATION:CANT1#	Smith TM, Hicks-Berger CA, Kim S, Kirley TL.#TITLE:Cloning, expression, and characterization of a soluble calcium-activated nucleotidase, a human enzyme belonging to a new family of extracellular nucleotidases.#JOURNAL:Arch Biochem Biophys. #YEAR:2002#PUBMED:12234496#;Murphy DM, Ivanenkov VV, Kirley TL. #TITLE:Bacterial expression and characterization of a novel, soluble, calcium-binding, and cal…
1614	O16G1e	oligo-1,6-glucosidase (glygn4 -> glygn5), extracellular	Starch and Sucrose Metabolism	3.2.1.10	( 6476.1 )	0	0	0	NCD
1615	O16G2e	oligo-1,6-glucosidase (strch2 ->strch3), extracellular	Starch and Sucrose Metabolism	3.2.1.10	( 6476.1 )	0	0	0	NCD
1633	OMPDC	orotidine-5'-phosphate decarboxylase	Pyrimidine Biosynthesis	4.1.1.23	( 7372.1 )	0	0	4	LOCUS:_7372#TRANSCRIPT:1#ABBREVIATION:UMPS#ECNUMBERS:2.4.2.10,,4.1.1.23#	Patterson D, Jones C, Morse H, Rumsby P, Miller Y, Davis R. #TITLE:Structural gene coding for multifunctional protein carrying orotate phosphoribosyltransferase and OMP decarboxylase activity is located on long arm of human chromosome 3.#JOURNAL:Somatic Cell Genet#YEAR:1983#PUBMED:6574608#;McClard RW, Black MJ, Livingstone LR, Jones ME.#TITLE:Isolation and initial characterization of the single p…
1641	ORPT	orotate phosphoribosyltransferase	Pyrimidine Biosynthesis	2.4.2.10	( 7372.1 )	0	0	4	LOCUS:_7372#TRANSCRIPT:1#ABBREVIATION:UMPS#ECNUMBERS:2.4.2.10,,4.1.1.23#	Patterson D, Jones C, Morse H, Rumsby P, Miller Y, Davis R. #TITLE:Structural gene coding for multifunctional protein carrying orotate phosphoribosyltransferase and OMP decarboxylase activity is located on long arm of human chromosome 3.#JOURNAL:Somatic Cell Genet#YEAR:1983#PUBMED:6574608#;McClard RW, Black MJ, Livingstone LR, Jones ME.#TITLE:Isolation and initial characterization of the single p…
1646	P45027A12m	5-beta-cholestane-3-alpha,7-alpha,12-alpha-triol 27-hydroxylase	Bile Acid Biosynthesis	1.14.13.15	( 1593.1 )	0	0	4	from uniprot Russell - bile acid biosynthesis review paper in human recon citation db NJ	Russell DW#TITLE:The enzymes, regulation, and genetics of bile acid synthesis#JOURNAL:Annu Rev Biochem#YEAR:2003#
1647	P45027A13m	5-beta-cholestane-3-alpha,7-alpha,12-alpha-triol 27-hydroxylase	Bile Acid Biosynthesis	1.14.13.15	( 1593.1 )	0	0	4	from uniprot NJ	Russell DW#TITLE:The enzymes, regulation, and genetics of bile acid synthesis#JOURNAL:Annu Rev Biochem#YEAR:2003#
1649	P45027A15m	5-beta-cytochrome P450, family 27, subfamily A, polypeptide 1	Bile Acid Biosynthesis	1.14.13.15	( 1593.1 )	0	0	4	from uniprot NJ	Russell DW#TITLE:The enzymes, regulation, and genetics of bile acid synthesis#JOURNAL:Annu Rev Biochem#YEAR:2003#
1650	P45027A16m	Cytochrome P450 27	Bile Acid Biosynthesis	1.14.13.15	( 1593.1 )	0	0	4	from uniprot NJ	Russell DW#TITLE:The enzymes, regulation, and genetics of bile acid synthesis#JOURNAL:Annu Rev Biochem#YEAR:2003#
1750	PPAtm	Propionate transport, diffusion	Transport, Mitochondrial			0	0	4	TDV Short-chain fatty acid can diffuse through mitochondrial membrane	Tassani V, Cattapan F, Magnanimi L, Peschechera A.#TITLE:Anaplerotic effect of propionyl carnitine in rat heart mitochondria.#JOURNAL:Biochem Biophys Res Commun#YEAR:1994#PUBMED:8135845#
1756	PPDOy	Propane-1,2-diol:NADP+ 1-oxidoreductase	Pyruvate Metabolism	1.1.1.21	( 8574.1 ) or ( 231.1 ) or ( 10327.2 ) or ( 10327.1 )	0	0	4	NCD	Vander Jagt DL, Robinson B, Taylor KK, Hunsaker LA.#TITLE:Reduction of trioses by NADPH-dependent aldo-keto reductases. Aldose reductase, methylglyoxal, and diabetic complications#JOURNAL:J Biol Chem#YEAR:1992#PUBMED:1537826#;Kelly VP, Sherratt PJ, Crouch DH, Hayes JD#TITLE:Novel homodimeric and heterodimeric rat gamma-hydroxybutyrate synthases that associate with the Golgi apparatus define a dis…
1770	PRO1xm	proline oxidase (NAD), mitochondrial	Arginine and Proline Metabolism		( 5625.1 )	0	0	2	NCD	Gogos JA, Santha M, Takacs Z, Beck KD, Luine V, Lucas LR, Nadler JV, Karayiorgou M.#TITLE:The gene encoding proline dehydrogenase modulates sensorimotor gating in mice. #JOURNAL:Nat Genet#YEAR:1999#PUBMED:10192398#
1772	PROD2m	Proline dehydrogenase (m)	Arginine and Proline Metabolism	1.5.99.8	( 5625.1 )	0	0	2	JLR SAB m	Gogos JA, Santha M, Takacs Z, Beck KD, Luine V, Lucas LR, Nadler JV, Karayiorgou M.#TITLE:The gene encoding proline dehydrogenase modulates sensorimotor gating in mice. #JOURNAL:Nat Genet#YEAR:1999#PUBMED:10192398#
1779	PROSTGE2t3	prostaglandine E2 transport (ATP-dependent)	Transport, Extracellular		( 10257.1 )	0	0	4	IT	Chen ZS, Lee K, Kruh GD.#TITLE:Transport of cyclic nucleotides and estradiol 17-beta-D-glucuronide by multidrug resistance protein 4. Resistance to 6-mercaptopurine and 6-thioguanine.#JOURNAL:J Biol Chem. #YEAR:2001#PUBMED:11447229#;Reid G, Wielinga P, Zelcer N, van der Heijden I, Kuil A, de Haas M, Wijnholds J, Borst P. #TITLE:The human multidrug resistance protein MRP4 functions as a prostaglan…
1807	PVD3	Previtamin D3 formation	Vitamin D			0	0	4	This reaction takes place in skin and needs UV 290-305. based on Vitamins, G.F.M. Ball,2004, Blackwell publishing, 1st ed (book) pg.194 IT	Ball, G.F.M#TITLE:Vitamins: Their Role in the Human Body#YEAR:2004#
1840	RTOT4	R total flux	R Group Synthesis			0	0	0	User defined, tissue specific fluxes that can be customized w/ various ratios of R1 through R5 NJ
1932	SFGTH	S-Formylglutathione hydralase	Tyrosine metabolism	3.1.2.12	( 2098.1 )	0	0	4	NCD	Engeland K, Hoog JO, Holmquist B, Estonius M, Jornvall H, Vallee BL#TITLE:Mutation of Arg-115 of human class III alcohol dehydrogenase: a binding site required for formaldehyde dehydrogenase activity and fatty acid activation#JOURNAL:Proc Natl Acad Sci U S A#YEAR:1993#PUBMED:8460164#;Uotila L, Koivusalo M#TITLE:Purification and properties of S-formylglutathione hydrolase from human liver#JOURNAL:…
2009	SUCRe	sucrose hydrolyzing enxyme, extracellular	Galactose metabolism	3.2.1.26	( 6476.1 ) or ( 8972.1 )	0	0	4	NCD	Devlin, TM#TITLE:Textbook of Biochemistry with Clinical Correlations#YEAR:2001#;Wu GD, Wang W, Traber PG#TITLE:Isolation and characterization of the human sucrase-isomaltase gene and demonstration of intestine-specific transcriptional elements#JOURNAL:J Biol Chem#YEAR:1992#PUBMED:1560017#;Naim HY, Sterchi EE, Lentze MJ#TITLE:Structure, biosynthesis, and glycosylation of human small intestinal mal…
2122	VD3	Vitamin D3 formation	Vitamin D			0	0	4	This reaction takes place in skin and needs body temperature based on Vitamins, G.F.M. Ball,2004, Blackwell publishing, 1st ed (book) pg.194 IT	Ball, G.F.M#TITLE:Vitamins: Their Role in the Human Body#YEAR:2004#
2123	VITD3Hm	Vitamin D-25-hydroxylase (D3)	Vitamin D		( 1593.1 )	0	0	4	based on Vitamins, G.F.M. Ball,2004, Blackwell publishing, 1st ed (book) pg.196 IT	Ball, G.F.M#TITLE:Vitamins: Their Role in the Human Body#YEAR:2004#;Guo YD, Strugnell S, Back DW, Jones G.#TITLE:Transfected human liver cytochrome P-450 hydroxylates vitamin D analogs at different side-chain positions.#JOURNAL:Proc Natl Acad Sci U S A.#YEAR:1993#PUBMED:7690968#
2124	VITD3t2	Vitamin D3 uptake	Transport, Extracellular			0	0	2	I am not sure how vitamin D3 is taken up from peripheral cells based on Vitamins, G.F.M. Ball,2004, Blackwell publishing, 1st ed (book) pg.193 IT	Ball, G.F.M#TITLE:Vitamins: Their Role in the Human Body#YEAR:2004#
2125	VITD3tm3	Vitamin D3 transport in mitochondria	Transport, Mitochondrial			0	0	2	I am not sure how vitamin D3 is transported from cytosol in mitochondria based on Vitamins, G.F.M. Ball,2004, Blackwell publishing, 1st ed (book) pg.193 IT	Ball, G.F.M#TITLE:Vitamins: Their Role in the Human Body#YEAR:2004#
2156	DM_4hrpo	DM_4hrpo	Exchange/demand reaction			0	0	0
2157	DM_anth	DM_anth	Exchange/demand reaction			0	0	0
2172	FAOXC17C15m	FAOXC17C15m	Fatty acid oxidation		( 37.1 and 3030.1 and 3032.1 )	0	0	0
2181	FRDPtcr	FRDPtcr	Transport, Endoplasmic Reticular			0	0	0
2208	r0074	r0074	Urea cycle/amino group metabolism		8659.1	0	0	0
2237	r0423	r0423	Miscellaneous		3417.1 or 3418.1	0	0	0
2256	r0571	r0571	Valine, Leucine, and Isoleucine Metabolism			0	0	0
2262	r0643	r0643	Valine, Leucine, and Isoleucine Metabolism		224.1 or 217.1 or 219.1 or 223.1 or 501.1	0	0	0
2287	r0813	r0813	Transport, Extracellular		8714.1	0	0	0
2351	r1402	r1402	Exchange/demand reaction		8908.1 or 2992.1	0	0	0
2352	r1403	r1403	Exchange/demand reaction			0	0	0
2358	r1434	r1434	Transport, Mitochondrial			0	0	0
2367	r1514	r1514	Transport, Extracellular		19.1	0	0	0
2376	r1559	r1559	Transport, Extracellular		8140.1	0	0	0
2405	r1700	r1700	Transport, Extracellular		9057.1	0	0	0
2435	r1753	r1753	Transport, Extracellular		9057.1	0	0	0
2513	r1903	r1903	Transport, Extracellular		9057.1	0	0	0
2520	r1916	r1916	Transport, Extracellular		9057.1	0	0	0
2591	r2108	r2108	Transport, Extracellular		6566.1	0	0	0
2597	r2118	r2118	Transport, Extracellular		6566.1	0	0	0
2612	sink_pre_prot(r)	sink_pre_prot(r)	Exchange/demand reaction			0	0	0
2613	4ABUTNtm	4ABUTNtm	Aminosugar Metabolism			0	0	0
2617	DM-Dem2emgacpail_prot_hs_r	DM-Dem2emgacpail_prot_hs_r	Aminosugar Metabolism			0	0	0
2618	DM-Dgpi_prot_hs_r	DM-Dgpi_prot_hs_r	Aminosugar Metabolism			0	0	0
2619	DM1p2cbxl	DM1p2cbxl	Aminosugar Metabolism			0	0	0
2620	DM_glc1man_g	DM_glc1man_g	Aminosugar Metabolism			0	0	0
2621	DM_glc3man_g	DM_glc3man_g	Aminosugar Metabolism			0	0	0
2622	DM_gncore2_g	DM_gncore2_g	Aminosugar Metabolism			0	0	0
2623	DM_mem2emgacpail_prot_hs_r	DM_mem2emgacpail_prot_hs_r	Aminosugar Metabolism			0	0	0
2624	DM_n5m2masn_g	DM_n5m2masn_g	Aminosugar Metabolism			0	0	0
2625	Dmidour	Dmidour	Aminosugar Metabolism			0	0	0
2628	EXcore2	EXcore2	Aminosugar Metabolism			0	0	0
2629	Excspg_a	Excspg_a	Aminosugar Metabolism			0	0	0
2630	Excspg_b	Excspg_b	Aminosugar Metabolism			0	0	0
2631	Excspg_c	Excspg_c	Aminosugar Metabolism			0	0	0
2632	Excspg_d	Excspg_d	Aminosugar Metabolism			0	0	0
2635	GP1Calphate	GP1Calphate	Aminosugar Metabolism			0	0	0
2639	aabutntm	aabutntm	Aminosugar Metabolism			0	0	0
2687	3SALATAi	3SALATAi	Cysteine Metabolism		( 2805.1 )	0	0	0
2688	3SPYRSP	3SPYRSP	Cysteine Metabolism			0	0	0
2689	ADK3	ADK3	Nucleotides		( 26289.1 ) or ( 26289.2 )	0	0	0
2690	ADPT	ADPT	Salvage Pathway		( 353.1 )	0	0	0
2692	ARTFR211	ARTFR211	R Group Synthesis			0	0	0
2693	ARTFR33	ARTFR33	R Group Synthesis			0	0	0
2697	CHLtm	CHLtm	Transport, Mitochondrial			0	0	0
2698	CLPNDCOAtx	CLPNDCOAtx	Transport, Peroxisomal			0	0	0
2703	DNDPt29m	DNDPt29m	Transport, Mitochondrial		( 60386.1 )	0	0	0
2704	DNDPt6m	DNDPt6m	Transport, Mitochondrial		( 60386.1 )	0	0	0
2705	ESTRADIOLGLCtr	ESTRADIOLGLCtr	Transport, Endoplasmic Reticular			0	0	0
2712	EX_dgsn(e)	EX_dgsn(e)	Miscellaneous			0	0	0
2713	EX_din(e)	EX_din(e)	Miscellaneous			0	0	0
2714	EX_estradiolglc(e)	EX_estradiolglc(e)	Miscellaneous			0	0	0
2715	EX_glygn4(e)	EX_glygn4(e)	Miscellaneous			0	0	0
2716	EX_gmp(e)	EX_gmp(e)	Miscellaneous			0	0	0
2717	EX_gsn(e)	EX_gsn(e)	Miscellaneous			0	0	0
2720	EX_strch2(e)	EX_strch2(e)	Miscellaneous			0	0	0
2721	EX_tethex3(e)	EX_tethex3(e)	Miscellaneous			0	0	0
2722	EX_thf(e)	EX_thf(e)	Miscellaneous			0	0	0
2723	EX_ump(e)	EX_ump(e)	Miscellaneous			0	0	0
2724	EX_vacc(e)	EX_vacc(e)	Miscellaneous			0	0	0
2725	Excspg_e	Excspg_e	Aminosugar Metabolism		(2180.1)	0	0	0
2726	FACOAL1812	FACOAL1812	Fatty acid activation		( 2180.1 )	0	0	0
2727	FACOAL1831	FACOAL1831	Fatty acid activation		( 2180.1 )	0	0	0
2728	FACOAL246_1	FACOAL246_1	Fatty acid activation		( 2180.1 )	0	0	0
2732	FUMm	FUMm	Citric Acid Cycle		( 2271.1 )	0	0	0
2733	G5SADrm	G5SADrm	Arginine and Proline Metabolism			0	0	0
2734	GHMT2r	GHMT2r	Glycine, Serine, and Threonine Metabolism		( 6470.1 ) or ( 6470.2 )	0	0	0
2735	GLXtp	GLXtp	Transport, Peroxisomal			0	0	0
2737	HSD3A1r	HSD3A1r	Steroid Metabolism		( 1109.1 )	0	0	0
2739	LGTHL	LGTHL	Pyruvate Metabolism		( 2739.1 )	0	0	0
2740	LNLNCAt	LNLNCAt	Transport, Extracellular			0	0	0
2743	NADPHtru	NADPHtru	Transport, Endoplasmic Reticular			0	0	0
2745	NADPtru	NADPtru	Transport, Endoplasmic Reticular			0	0	0
2748	PE_HStm	PE_HStm	Transport, Mitochondrial			0	0	0
2749	PLA2_2	PLA2_2	Glycerophospholipid Metabolism		( 8398.1 ) or ( 5320.1 ) or ( 8398.2 )	0	0	0
2750	PROtm	PROtm	Transport, Mitochondrial			0	0	0
2754	TETHEX3t	TETHEX3t	Transport, Extracellular			0	0	0
2756	UMPK3n	UMPK3n	Nucleotides		( 51727.1 )	0	0	0
2757	UMPKn	UMPKn	Nucleotides		( 51727.1 )	0	0	0
2758	URIK1	URIK1	Pyrimidine Biosynthesis		( 7371.1 ) or ( 83549.1 )	0	0	0
2759	VACCt	VACCt	Transport, Extracellular			0	0	0
2760	r1045	r1045	Transport, Extracellular		( 9153.1 ) or ( 64078.1 )	0	0	0
2761	r1515	r1515	Transport, Extracellular		19.1	0	0	0
2764	r2520	r2520	Transport, Mitochondrial		8402.1	0	0	0
2766	4hprolttm	4hprolttm	Aminosugar Metabolism		(10599.1)	0	0	0
2768	CRNtuNa	CRNtuNa	Transport, Extracellular		( 6584.1 )	0	0	0
2772	CYTK12n	CYTK12n	Nucleotides		( 51727.1 )	0	0	0
2773	CYTK13	CYTK13	Nucleotides		( 51727.1 )	0	0	0
2774	CYTK3	CYTK3	Nucleotides		( 26289.1 ) or ( 26289.2 )	0	0	0
2775	CYTK5	CYTK5	Nucleotides		( 51727.1 )	0	0	0
2777	GLCMter	GLCMter	Transport, Extracellular			0	0	0
2783	RADH	RADH	Vitamin A Metabolism			0	0	0
2784	RADH4	RADH4	Vitamin A Metabolism			0	0	0
2786	SUCCt2m	SUCCt2m	Transport, Mitochondrial		( 1468.1 )	0	0	0
2788	UGT1A6r	UGT1A6r	Steroid Metabolism		( 54575.1 ) or ( 54576.1 )	0	0	0
2789	UMPK4n	UMPK4n	Nucleotides		( 51727.1 )	0	0	0
2790	UREAt5	UREAt5	Transport, Extracellular		( 6523.1 )	0	0	0
2795	r0525	r0525	Lysine Metabolism		10157.1	0	0	0
2796	r0780	r0780	Cholesterol Metabolism		7108.1	0	0	0
2797	r1518	r1518	Transport, Extracellular		19.1	0	0	0
2798	r2395	r2395	Transport, Mitochondrial		83884.1	0	0	0
2799	r2396	r2396	Transport, Mitochondrial		83884.1	0	0	0
2800	r2449	r2449	Transport, Extracellular		( 9153.1 ) or ( 64078.1 )	0	0	0
2806	Ex_so3[e]	Ex_so3[e]				0	0	0
2907	EX_3h5chola	EX_3h5chola	Exchange/demand reaction			0	0	0
2910	RIBt2	RIBt2	Exchange/demand reaction			0	0	0
2912	EX_lhcr	EX_lhcr	Exchange/demand reaction			0	0	0
2987	sink_Ser/Thr[g]	sink_Ser/Thr[g]	Sink			0	0	0
2995	sink_Asn-X-Ser/Thr[r]	sink_Asn-X-Ser/Thr[r]	Sink			0	0	0
2998	EX_odecrn[e]	EX_odecrn[e]	Exchange			-1000	1000	0
2999	EX_ttdcrn[e]	EX_ttdcrn[e]	Exchange			-1000	1000	0
3000	EX_clpnd[e]	EX_clpnd[e]	Exchange			-1000	1000	0
3001	EX_hdcea[e]	EX_hdcea[e]	Exchange			-1000	1000	0
3002	EX_tmao[e]	EX_tmao[e]	Exchange			-1000	1000	0
3003	EX_ivcrn[e]	EX_ivcrn[e]	Exchange			-1000	1000	0
3004	EX_dodecanac[e]	EX_dodecanac[e]	Exchange			-1000	1000	0
3005	EX_c10crn[e]	EX_c10crn[e]	Exchange			-1000	1000	0
3006	EX_5eipenc[e]	EX_5eipenc[e]	Exchange			-1000	1000	0
